# Supplementary material
Source: MDPI journal article supplement (https://www.mdpi.com/2304-6740/11/8/321)
Supplement: s1 [file s1]

# Supplementary Information

Article

## Synthesis of new organoselenium-based succinanilic and maleanilic derivatives and in-silico studies as possible SARS-CoV-2 main protease inhibitors

Saad Shaaban<sup>1,2,\*</sup>, Yasair S. Al-Faiyz<sup>1</sup>, Ghayah M. Alsulaim<sup>1,\*</sup>, Mohamed Alaasar<sup>3,4</sup>, Nasser Amri<sup>5</sup>, Hussein Ba-Ghazal<sup>1</sup>, Ahmed A. Al-Karmalawy<sup>6</sup>, and Aly Abdou<sup>7\*</sup>

<sup>1</sup>Department of Chemistry, College of Science, King Faisal University, Al-Ahsa 31982, Saudi Arabia; Sbrahim@kfu.edu.sa

<sup>2</sup>Department of Chemistry, Faculty of Science, Mansoura University, 35516 Mansoura, Egypt

<sup>3</sup>Institute of Chemistry, Martin Luther University Halle–Wittenberg, Halle (Saale), Germany, mohamed.alaasar@chemie.uni-halle.de

<sup>4</sup>Department of Chemistry, Faculty of Science, Cairo University, Giza, Egypt

<sup>5</sup>Department of Chemistry, Faculty of Science, Jazan University, Jazan 45142, Saudi Arabia

<sup>6</sup>Pharmaceutical Chemistry Department, Faculty of Pharmacy, Ahram Canadian University, 6th of October City, Giza 12566, Egypt. akarmalawy@acu.edu.eg

<sup>7</sup>Department of Chemistry, Faculty of Science, Sohag University, Sohag 82524, Egypt, aly\_abdou@science.sohag.edu.eg

\* Correspondence: sbrahim@kfu.edu.sa (S. Shaaban); aly\_abdou@science.sohag.edu.eg (A. Abdou); g.m.alsulaim@gmail.com (G.alsulaim)

### **SI.1. MD simulations**

The MD simulations were carried out using Desmond simulation package of Schrödinger LLC [1]. The NPT ensemble with the temperature 300 K and a pressure 1 bar was applied in all runs. The simulation length was 200 ns with a relaxation time 1 ps for the ligands. The OPLS3 force field parameters were used in all simulations [2]. The cutoff radius in Coulomb interactions was 9.0 Å. The orthorhombic periodic box boundaries were set 10 Å away from the protein atoms. The water molecules were explicitly described using the transferable intermolecular potential with three points (TIP3P) model [3]. Salt concentration set to 0.15 M NaCl and was built using the System Builder utility of Desmond [4]. The Martyna–Tuckerman–Klein chain coupling scheme with a coupling constant of 2.0 ps was used for the pressure control and the Nosé–Hoover chain coupling scheme for the temperature control [5]. Nonbonded forces were calculated using a RESPA integrator where the short-range forces were updated every step and the long-range forces were updated every three steps. The trajectories were saved at 20 ns intervals for analysis. The behavior and interactions between the ligands and protein were analyzed using the Simulation Interaction Diagram tool implemented in Desmond MD package. The stability of MD simulations was monitored by looking on the RMSD of the ligand and protein atom positions in time.

### **SI.2. MM-GBSA calculations and MD trajectory analysis**

Simulation interactions diagram panel of Maestro software was used to monitoring interactions contribution in the ligand-protein stability. The molecular mechanics generalized born/solvent accessibility (MM – GBSA) was performed to calculate the ligand binding free energies and ligand strain energies for docked compounds over the last 50 ns with `thermal_mmgbsa.py` python script provided by Schrodinger which takes a Desmond trajectory file, splits it into individual snapshots, runs the MM-GBSA calculations on each frame, and outputs the average computed binding energy.

### SI.3. Molecular docking against 6lu7

Also, the titled compounds were used as ligands (substrates) for investigation of their binding ability towards SARS-CoV-2 protease (PDB ID: 6LU7).

The 6LU7 protein serves as the target receptor, while the chemicals that have been mentioned serve as the substrate. Figure (S3.a) displays the three-dimensional structure of the SARS-CoV-2 protease (PDB ID: 6LU7) that was developed before. Figure (S3.b) illustrates the active site pocket inside the Dummy atoms where molecular docking occurred. The amino acids of active site pocket are THR24, THR25, THR26, LEU27, HIS41, CYS44, THR45, SER46, MET49, PRO52, TYR54, PHE140, LEU141, ASN142, GLY143, SER144, CYS145, HIS163, HIS164, MET165, GLU166, LEU167, PRO168, HIS172, ASP187, ARG188, GLN189, THR190, and GLN192. The molecular docking results are shown in Table (S3), and Figure (S3.c) illustrates the location of the optimal conformation of the substrates under study inside the binding pocket. Table (S3) shows a presentation of the outcomes of the molecular docking.

As can be shown in Table (S3), and Figure (S3.c); the docking scores (S) for the subject substrates are significantly on the negative side. They connect to the 6LU7 pocket in several different ways, including via hydrogen bonds and interactions that are hydrophobic. This suggests that the docked substrates are engaging in a robust interaction with the active region of the receptor. According to Table (S3), the compounds in issue have low RMSD values and high docking scores (regarding S and Kcal/mol) regarding the 6LU7. These values varied from -8.96 kcal/mol and 1.40 for compound 10 and -8.93 kcal/mol and 1.43 for compound 12 to -6.79 kcal/mol and 1.69 for compound 7. Therefore, compounds 10 and 12 seem to be the most energetic candidate because it has a high docking score (-8.96 and -8.93 Kcal/mol) and a low RMSD value (1.40 and 1.43). The following is a list of the levels of inhibitory activity in the order that they were reached: 10  $\approx$  12 > 11 > 9 > 8 > 7, Table (S3). The docking results showed that the compounds with the highest activity level were compounds 10, 12, and 11.

Compound 10 creates two hydrogen bond donors: between SE11, and O17 with HIS164, and THR45, with distances of 3.29, and 2.93 angstroms, respectively, Table (S3) and Figure (S3.c). While, compound 12 creates two hydrogen bond donors: between N13, and O19 with GLN189, and THR190, with distances of 3.06, and 3.03 angstroms, respectively, Table (S3) and Figure (S3.c). In addition to two hydrogen bond acceptors, between SE11, and O16 with GLY143, and GLU166, with distances of 3.13, and 2.94 angstroms, respectively, Table (S3) and Fig. (S3.c). In

the case of compound 11 creates two hydrogen bond donors: between SE11-MET165, and SE11-THR190, with distances of 3.19, and 3.10 angstroms. In addition to one hydrogen bond acceptor, between O20 with GLY143, with distances of 3.11 angstroms, Table (S3) and Fig. (S3.c).

The inhibition constant, sometimes referred to as the  $K_i$  value, is a critical component that is taken into consideration when deciding whether a molecule has the potential to be a hit, lead, or therapeutic candidate. For a molecule to be considered a hit or a lead chemical, the  $K_i$  value of the molecule must fall within the micromolar ( $\mu\text{M}$ ) range. This is because, in most cases, a low  $K_i$  number indicates a high potency. The 6LU7 domain  $K_i$  values of the discovered compounds varied from 0.27  $\mu\text{M}$  (in the case of compound 10) and 0.29  $\mu\text{M}$  (in the case of compound 12) to 8.27  $\mu\text{M}$  (in the case of compound 8) and 10.77  $\mu\text{M}$  (in the case of compound 7), which shows that every single one of them has the potential to be a hit and a lead. Accordingly, therapeutic applications are a viable option for the compounds produced and shown to have the lowest  $K_i$  value (Table (S3)).

### **List of SI Figures**

Figure S1. Various possible conformers of the title compounds

Figure S2. The plot of Natural charges distribution of the compounds 7-12 using the B3LYP/6-311G(d,p) in the gas phase

Figure S3. (a): The 3D structure of the 6lu7 of novel coronavirus (COVID-19); (b): Active site pocket in which molecular docking occurred; and (c) 3D and 2D interactions of the titled compounds inside the active site of the target receptor.

|    |                                                                                     |                                                                                      |
|----|-------------------------------------------------------------------------------------|--------------------------------------------------------------------------------------|
|    | 7                                                                                   | 8                                                                                    |
| C1 | 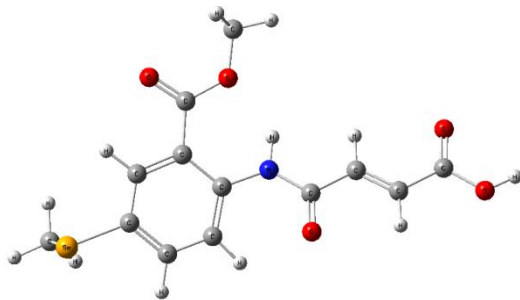   |    |
|    | -823.5107                                                                           | -803.2082                                                                            |
| C2 |                                                                                     |    |
|    |                                                                                     | -803.1422                                                                            |
| C3 |                                                                                     |   |
|    |                                                                                     | -803.8313                                                                            |
|    | 9                                                                                   | 10                                                                                   |
| C1 |  |  |
|    | -810.0271                                                                           | -841.326                                                                             |

|    |                                                                                   |                                                                                      |
|----|-----------------------------------------------------------------------------------|--------------------------------------------------------------------------------------|
| C2 | 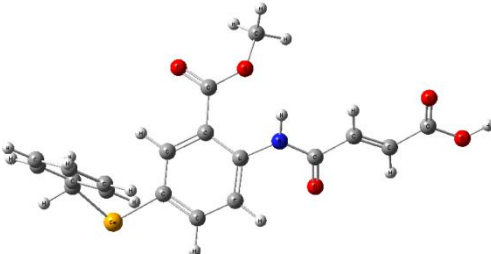 |    |
|    | -810.1328                                                                         | -841.303                                                                             |
| C3 |  |    |
|    | -810.6821                                                                         | -841.492                                                                             |
| C4 |                                                                                   |   |
|    |                                                                                   | -841.043                                                                             |
| C5 |                                                                                   |  |
|    |                                                                                   | -841.452                                                                             |
| C6 |                                                                                   |  |
|    |                                                                                   | -841.651                                                                             |

|    |                                                                                     |                                                                                      |
|----|-------------------------------------------------------------------------------------|--------------------------------------------------------------------------------------|
| C7 |                                                                                     | 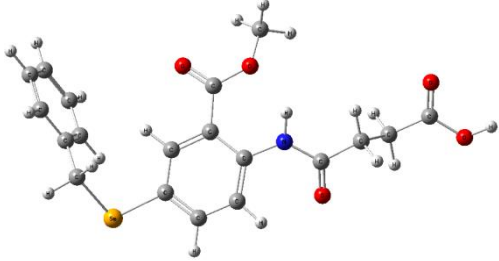   |
|    |                                                                                     | -841.602                                                                             |
| C8 |                                                                                     |    |
|    |                                                                                     | -841.535                                                                             |
| C9 |                                                                                     |   |
|    |                                                                                     | -842.031                                                                             |
| 11 | 12                                                                                  |                                                                                      |
| C1 |  |  |
|    | -805.083                                                                            | -883.008                                                                             |
| C2 |  |  |
|    | -805.262                                                                            | -883.143                                                                             |

|    |                                                                                   |                                                                                      |
|----|-----------------------------------------------------------------------------------|--------------------------------------------------------------------------------------|
| C3 | 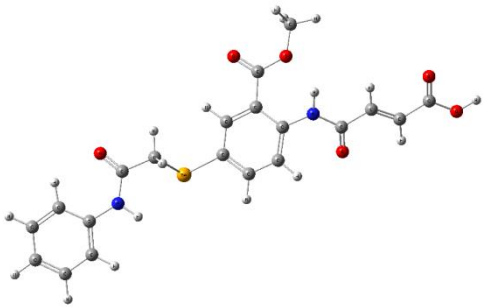 |    |
|    | -805.828                                                                          | -883.048                                                                             |
| C4 |                                                                                   |    |
|    |                                                                                   | -883.128                                                                             |
| C5 |                                                                                   |   |
|    |                                                                                   | -883.229                                                                             |
| C6 |                                                                                   |  |
|    |                                                                                   | -883.112                                                                             |
| C7 |                                                                                   |  |

|                                                                |  |                                                                                    |
|----------------------------------------------------------------|--|------------------------------------------------------------------------------------|
|                                                                |  | -883.265                                                                           |
| C8                                                             |  | 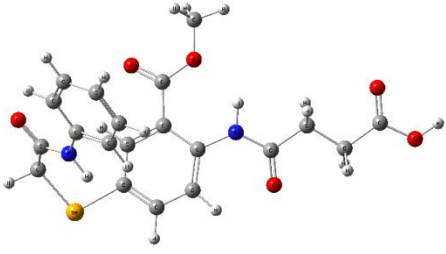 |
|                                                                |  | -883.204                                                                           |
| C9                                                             |  |  |
|                                                                |  | -883.677                                                                           |
| Figure S1. Various possible conformers of the title compounds. |  |                                                                                    |

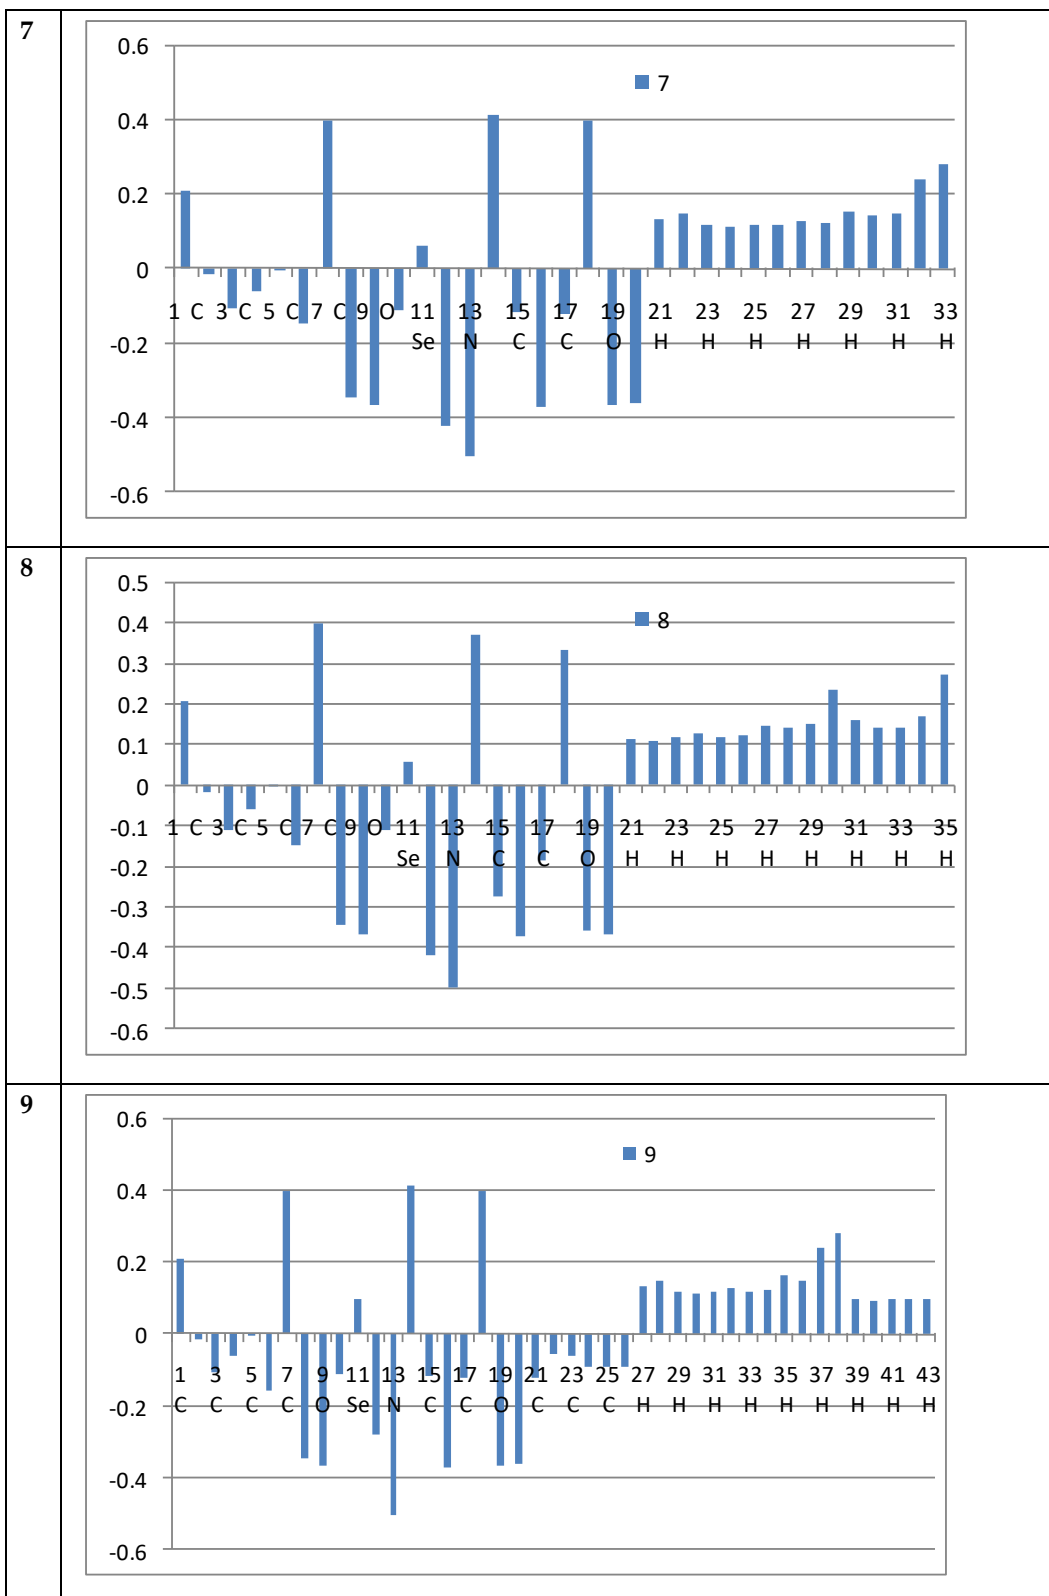

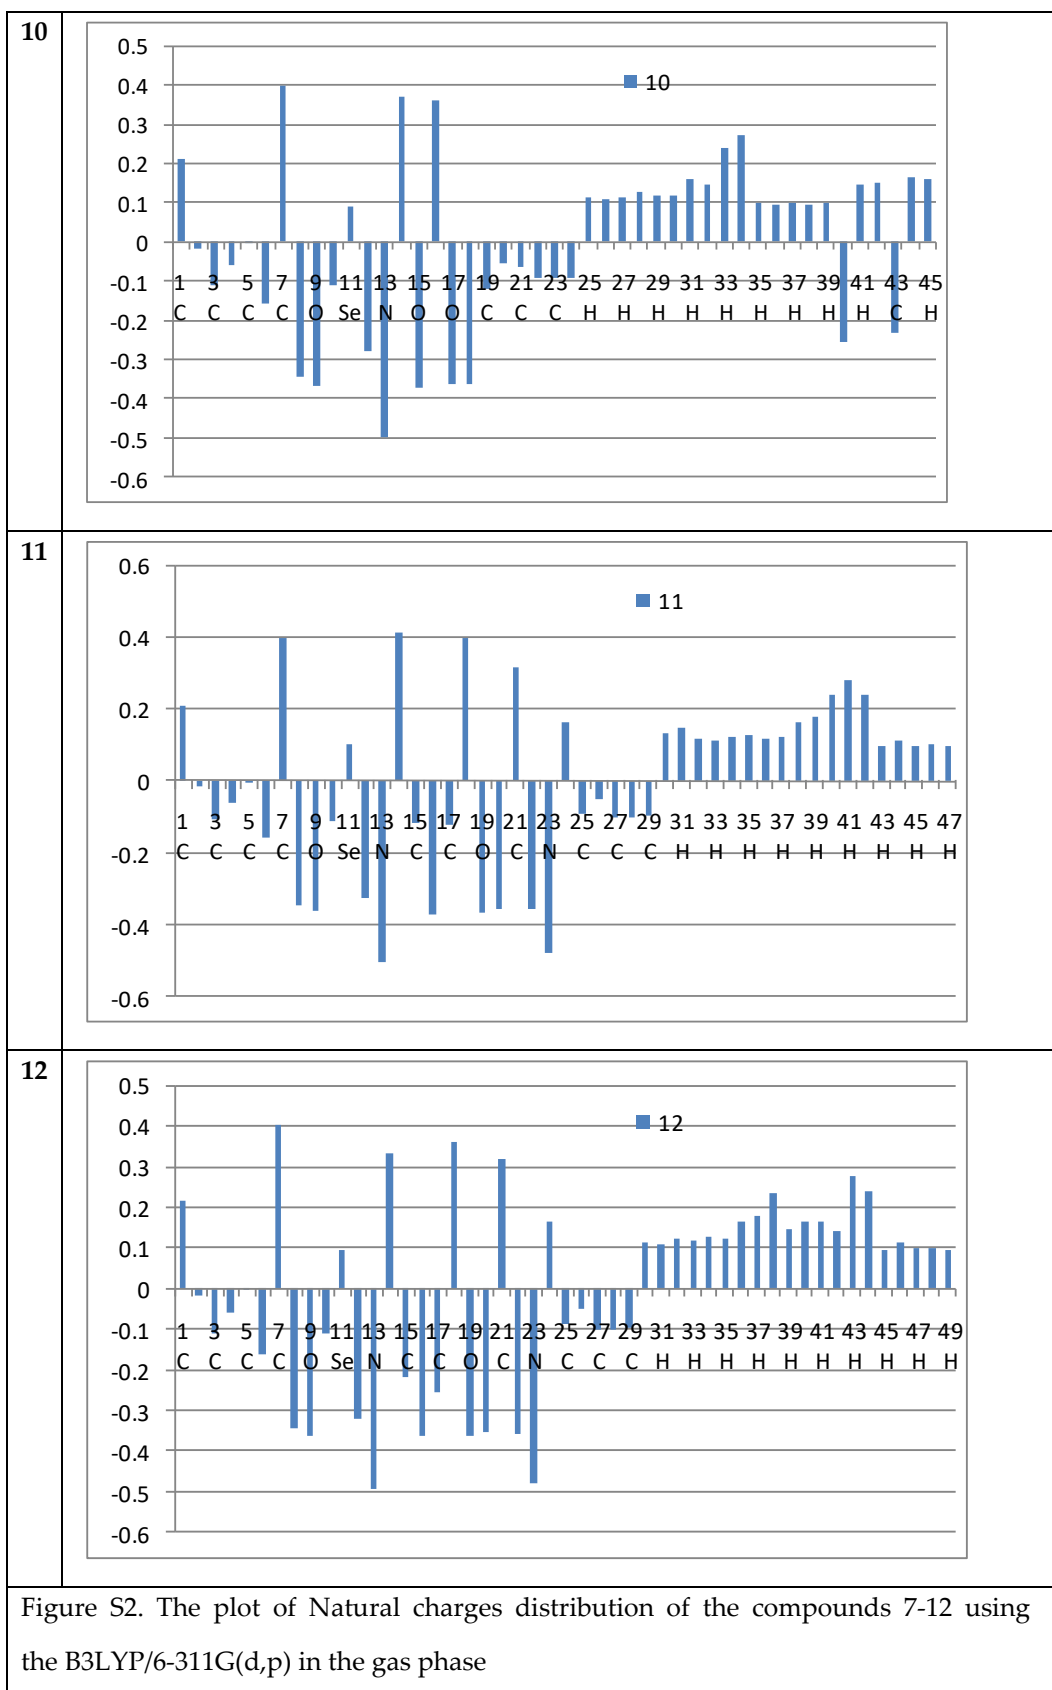

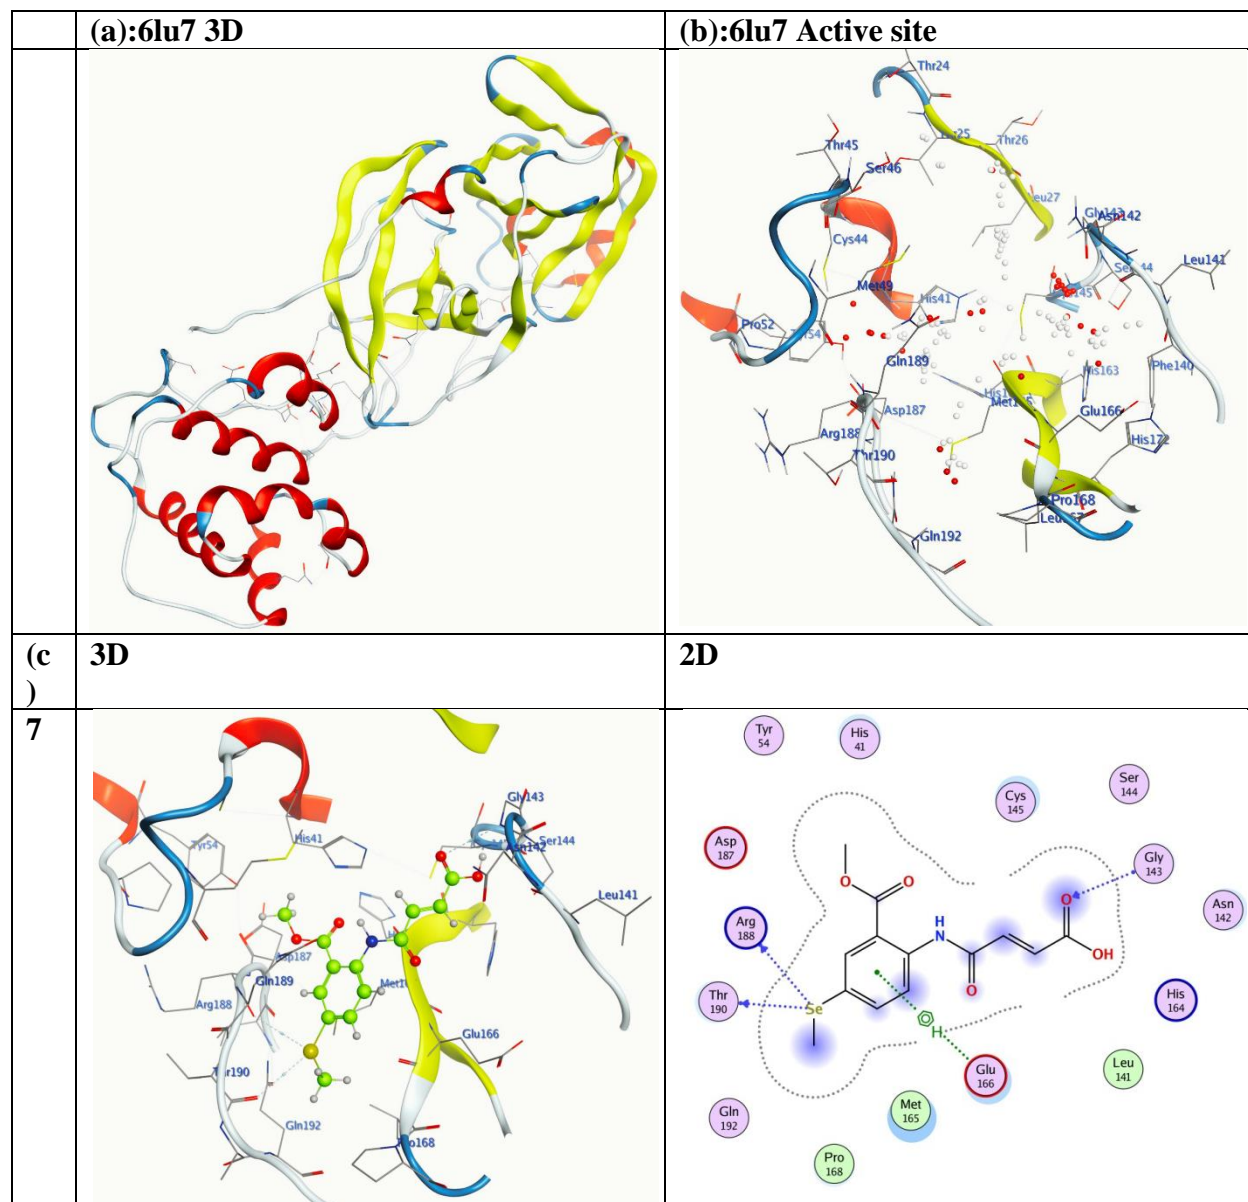

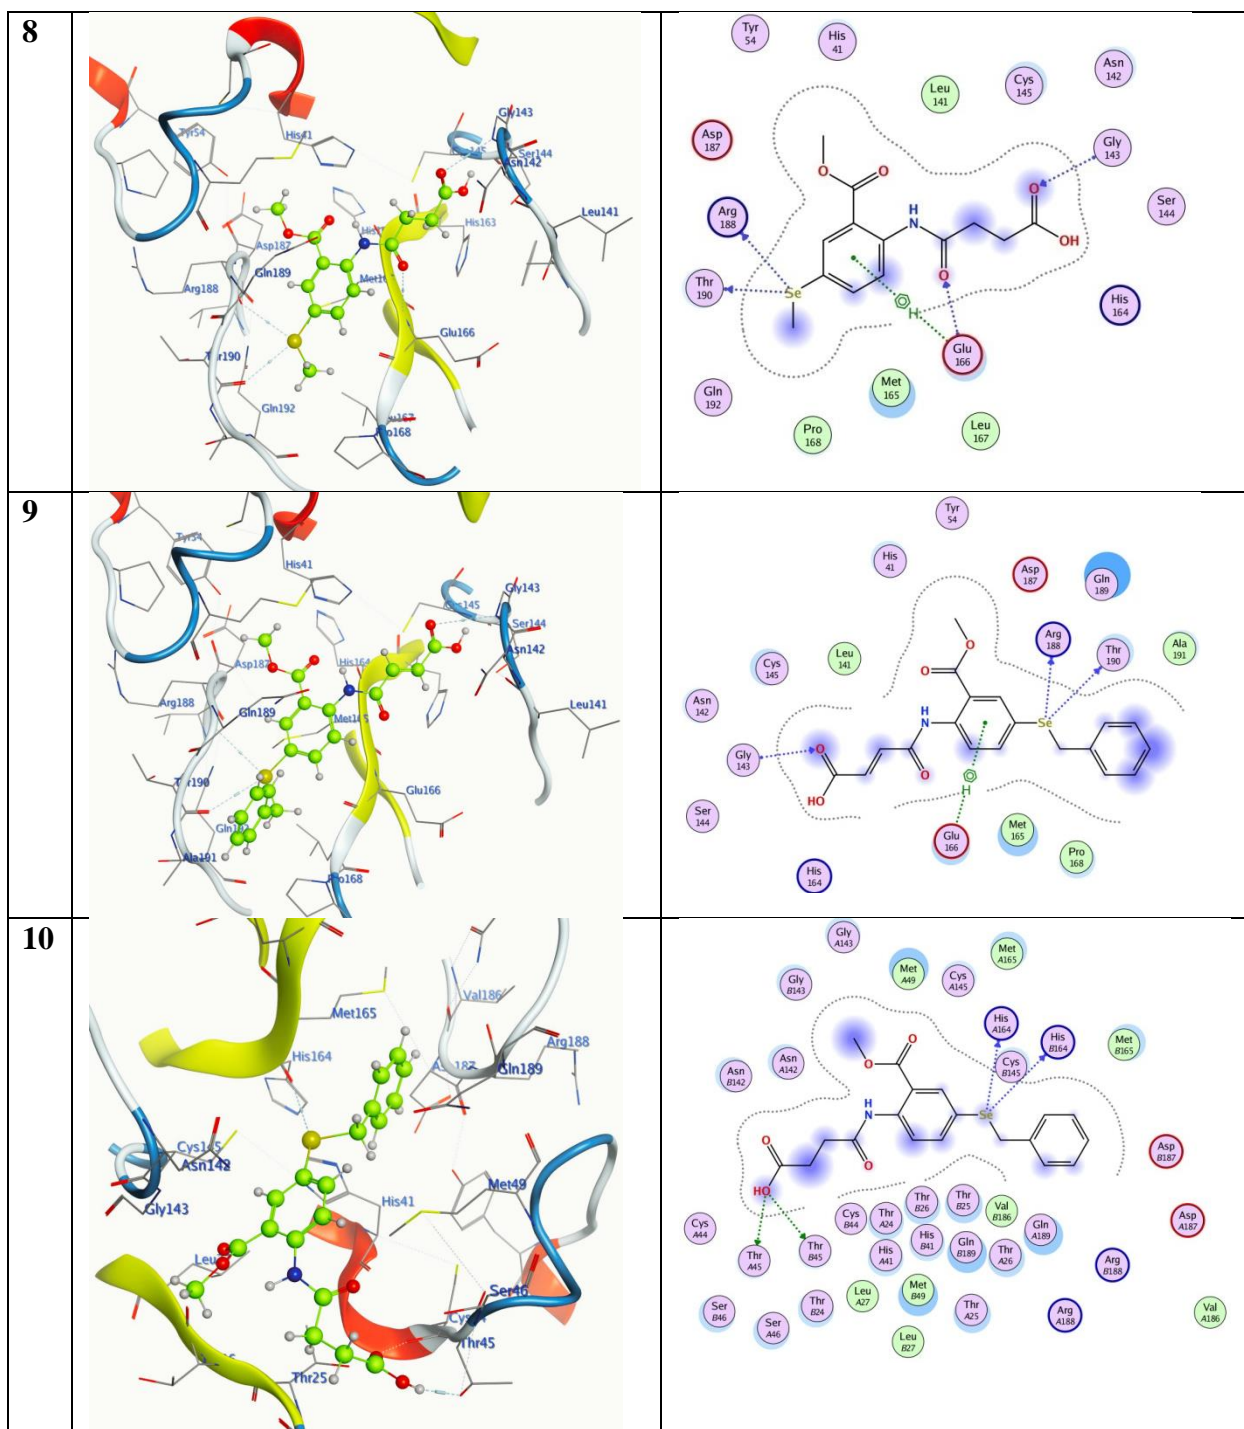

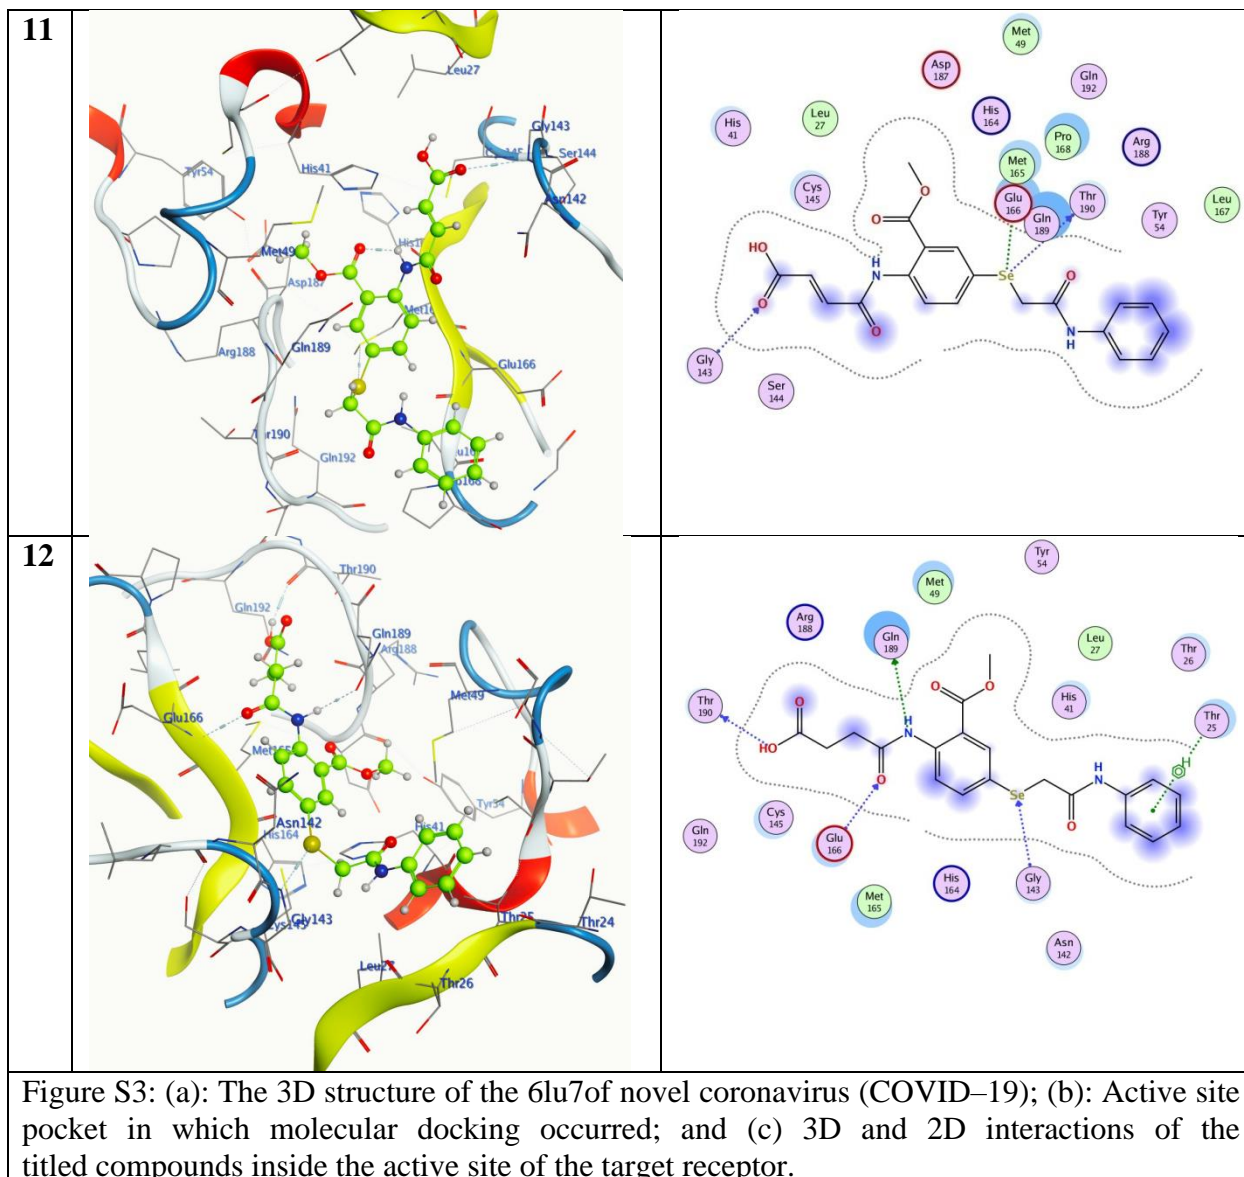

Figure S3: (a): The 3D structure of the 6lu7of novel coronavirus (COVID-19); (b): Active site pocket in which molecular docking occurred; and (c) 3D and 2D interactions of the titled compounds inside the active site of the target receptor.

## **List f SI Tables**

Table S1. Drug Likeness parameters

Table S2. Pharmacokinetics, toxicities and receptor binding properties of potential bioactive compounds from medicinal plants using pkCSM web server

Table (S3): Molecular Docking data; Interaction type, and distance between ligand and receptor of the title compounds

Table S1. Drug Likeness parameters

|                        | 7                | 8                | 9                | 10               | 11               | 12               |
|------------------------|------------------|------------------|------------------|------------------|------------------|------------------|
| <b>MW</b>              | 342.209          | 344.225          | 418.307          | 420.323          | 461.332          | 463.348          |
| <b>log <i>P</i></b>    | 0.4301           | 0.6541           | 1.5822           | 1.8062           | 1.439            | 1.663            |
| <b>n<sub>Rot</sub></b> | 5                | 6                | 7                | 8                | 8                | 9                |
| <b>nHBA</b>            | 4                | 4                | 4                | 4                | 5                | 5                |
| <b>nHBD</b>            | 2                | 2                | 2                | 2                | 3                | 3                |
| <b>Lipinski rule</b>   | Yes; 0 violation |
| <b>ABS</b>             | 0.56             | 0.56             | 0.56             | 0.56             | 0.56             | 0.56             |
| <b>Log S</b>           | -2.84            | -2.58            | -4.19            | -3.93            | -2.84            | -3.30            |
| <b>GI</b>              | High             | High             | High             | High             | High             | High             |
| <b>Pgp</b>             | No               | No               | No               | No               | No               | No               |
| <b>BBB</b>             | No               | No               | No               | No               | No               | No               |
| <b>TPSA</b>            | 121.519          | 122.209          | 156.576          | 157.266          | 172.653          | 173.342          |
| <b>LogKp</b>           | -7.13            | -7.38            | -6.59            | -6.83            | -7.13            | -7.91            |
| <b>SA</b>              | 2.70             | 2.56             | 3.26             | 3.15             | 2.70             | 3.36             |

MW: molecular weight; n<sub>Rot</sub>: number of rotatable bonds; HBA: number of hydrogen bond acceptors; nHBD: number of hydrogen bond donors; log *P*: n-octanol/water partition coefficient; TPSA: topological polar surface area; S.A.: synthetic accessibility; G.I.: gastrointestinal absorption; BBB: blood-brain barrier; Pgp: P-glycoprotein substrate; **LogKp**: skin permeation (cm/s); **ABS**: Abbot Bioavailability Score.

**Table S2.** Pharmacokinetics, toxicities and receptor binding properties of potential bioactive compounds from medicinal plants using pkCSM web server.

|                     |                                   | 7      | 8      | 9      | 10     | 11     | 12     |
|---------------------|-----------------------------------|--------|--------|--------|--------|--------|--------|
| <b>Absorption</b>   | Water solubility                  | -2.323 | -2.353 | -3.99  | -4.045 | -3.878 | -3.898 |
|                     | Caco2 permeability                | 0.18   | 0.159  | 0.005  | 0.367  | -0.031 | -0.033 |
|                     | Intestinal absorption (human)     | 44.025 | 44.803 | 49.294 | 50.072 | 45.608 | 46.385 |
|                     | Skin Permeability                 | -2.735 | -2.735 | -2.735 | -2.735 | -2.735 | -2.735 |
|                     | P-glycoprotein substrate          | Yes    | Yes    | Yes    | Yes    | Yes    | Yes    |
|                     | P-glycoprotein I inhibitor        | No     | No     | No     | No     | No     | No     |
|                     | P-glycoprotein II inhibitor       | No     | No     | No     | No     | No     | No     |
| <b>Distribution</b> | VDss (human)                      | -1.053 | -1.021 | -1.201 | -1.152 | -1.041 | -0.998 |
|                     | Fraction unbound (human)          | 0.395  | 0.391  | 0.074  | 0.074  | 0.062  | 0.062  |
|                     | BBB permeability                  | -0.47  | -0.506 | -0.272 | -0.308 | -0.936 | -0.997 |
|                     | CNS permeability                  | -3.04  | -3.053 | -2.863 | -2.915 | -3.336 | -3.355 |
| <b>Metabolism</b>   | CYP2D6 substrate                  | No     | No     | No     | No     | No     | No     |
|                     | CYP3A4 substrate                  | No     | No     | No     | No     | No     | No     |
|                     | CYP1A2 inhibitor                  | No     | No     | No     | No     | No     | No     |
|                     | CYP2C19 inhibitor                 | No     | No     | No     | No     | No     | No     |
|                     | CYP2C9 inhibitor                  | No     | No     | No     | No     | No     | No     |
|                     | CYP2D6 inhibitor                  | No     | No     | No     | No     | No     | No     |
|                     | CYP3A4 inhibitor                  | No     | No     | No     | No     | No     | No     |
| <b>Excretion</b>    | Total Clearance                   | 1.83   | 1.822  | 2.133  | 2.129  | 2.212  | 2.209  |
|                     | Renal OCT2 substrate              | No     | No     | No     | No     | No     | No     |
| <b>Toxicity</b>     | AMES toxicity                     | No     | No     | No     | No     | No     | No     |
|                     | Max. tolerated dose (human)       | 1.566  | 1.535  | 0.305  | 0.289  | 0.396  | 0.372  |
|                     | hERG I inhibitor                  | No     | No     | No     | No     | No     | No     |
|                     | hERG II inhibitor                 | No     | No     | No     | No     | No     | No     |
|                     | Oral Rat Acute Toxicity (LD50)    | 2.294  | 2.302  | 2.631  | 2.638  | 2.549  | 2.559  |
|                     | Oral Rat Chronic Toxicity (LOAEL) | 2.115  | 2.093  | 2.088  | 2.067  | 2.138  | 2.117  |
|                     | Hepatotoxicity                    | No     | No     | No     | Yes    | No     | No     |
|                     | Skin Sensitisation                | No     | No     | No     | No     | No     | No     |
|                     | <i>T.Pyiformis</i> toxicity       | 0.283  | 0.283  | 0.285  | 0.285  | 0.285  | 0.285  |
|                     | Minnow toxicity                   | 0.834  | 0.706  | -0.765 | -0.892 | -0.11  | -0.237 |

| Table (S3): Molecular Docking data; Interaction type, and distance between ligand and receptor of the title compounds. |        |          |             |          |                 |                 |      |                  |
|------------------------------------------------------------------------------------------------------------------------|--------|----------|-------------|----------|-----------------|-----------------|------|------------------|
| <b>6lu7</b>                                                                                                            | Ligand | Receptor | Interaction | Distance | E<br>(kcal/mol) | S<br>(kcal/mol) | RMSD | Ki<br>( $\mu$ M) |
| <b>7</b>                                                                                                               | SE11   | ARG 188  | H-donor     | 3.43     | -0.80           | -6.79           | 1.69 | 10.77            |
|                                                                                                                        | SE11   | THR 190  | H-donor     | 3.33     | -1.00           |                 |      |                  |
|                                                                                                                        | O20    | GLY 143  | H-acceptor  | 3.30     | -1.20           |                 |      |                  |
|                                                                                                                        | 6-ring | GLU 166  | pi-H        | 4.50     | -0.90           |                 |      |                  |
| <b>8</b>                                                                                                               | SE11   | ARG 188  | H-donor     | 3.37     | -1.00           | -6.94           | 1.27 | 8.27             |
|                                                                                                                        | SE11   | THR 190  | H-donor     | 3.38     | -0.90           |                 |      |                  |
|                                                                                                                        | O16    | GLU 166  | H-acceptor  | 3.25     | -0.70           |                 |      |                  |
|                                                                                                                        | O20    | GLY 143  | H-acceptor  | 3.07     | -2.80           |                 |      |                  |
|                                                                                                                        | 6-ring | GLU 166  | pi-H        | 4.48     | -0.90           |                 |      |                  |
| <b>9</b>                                                                                                               | SE11   | ARG 188  | H-donor     | 3.48     | -1.00           | -7.68           | 1.33 | 2.39             |
|                                                                                                                        | SE11   | THR 190  | H-donor     | 3.41     | -1.70           |                 |      |                  |
|                                                                                                                        | O20    | GLY 143  | H-acceptor  | 3.30     | -1.20           |                 |      |                  |
|                                                                                                                        | 6-ring | GLU 166  | pi-H        | 4.47     | -1.00           |                 |      |                  |
| <b>10</b>                                                                                                              | SE11   | HIS 164  | H-donor     | 3.29     | -1.10           | -8.96           | 1.40 | 0.27             |
|                                                                                                                        | O17    | THR 45   | H-donor     | 2.93     | -2.70           |                 |      |                  |
| <b>11</b>                                                                                                              | SE11   | MET 165  | H-donor     | 3.19     | -1.60           | -7.99           | 1.33 | 1.41             |
|                                                                                                                        | SE11   | THR 190  | H-donor     | 3.10     | -0.50           |                 |      |                  |
|                                                                                                                        | O20    | GLY 143  | H-acceptor  | 3.11     | -2.50           |                 |      |                  |
| <b>12</b>                                                                                                              | N13    | GLN 189  | H-donor     | 3.06     | -1.00           | -8.93           | 1.43 | 0.29             |
|                                                                                                                        | O19    | THR 190  | H-donor     | 3.03     | -4.00           |                 |      |                  |
|                                                                                                                        | SE11   | GLY 143  | H-acceptor  | 3.13     | -2.20           |                 |      |                  |
|                                                                                                                        | O16    | GLU 166  | H-acceptor  | 2.94     | -2.60           |                 |      |                  |
|                                                                                                                        | 6-ring | THR 25   | pi-H        | 4.04     | -0.70           |                 |      |                  |

*Synthesis of methyl 2-amino-5-selenocyanatobenzoate (2)[6]*

Methyl 2-amino-5-selenocyanatobenzoate (**2**) was synthesized from methyl 2-aminobenzoate (12.5 mmol, 1.80 g) with triselenium dicyanide prepared *in situ* from malononitrile (15 mmol, 1.00 g) and selenium dioxide (30 mmol, 3.30 g). It was isolated as reddish solid; yield: 3.07 g (96%); m.p. = 118–119°C; *R*<sub>f</sub> = 0.4 (petroleum ether/ ethyl acetate 4:2, *v/v*). IR (KBr):  $\nu$ 3475 (N-H), 3366 (N-H), 2946 (C<sub>aliph</sub>-H), 2842 (C<sub>aliph</sub>-H), 2148 (CN), 1691 (C=O), 1551 (C=C), 1253 (C<sub>Ar</sub>-N), 1085 (C-O), 910, 815 (C-H bending), 556 (C-Se), 536 (C-H rocking), 460; <sup>1</sup>H NMR (400 MHz, DMSO-*d*<sub>6</sub>)  $\delta$  8.02 (s, 1H, Ar-H), 7.57 (d, *J* = 8.8 Hz, 1H, Ar-H), 7.08 (s, br, 2H, NH<sub>2</sub>), 6.84 (d, *J* = 8.8 Hz, 1H, Ar-H), 3.82 (s, 3H, OCH<sub>3</sub>). <sup>13</sup>C NMR (101 MHz, DMSO-*d*<sub>6</sub>)  $\delta$  166.73, 152.22, 140.09, 137.94, 118.28, 109.59, 105.54, 105.47, 51.73. MS (EI, 70 eV) *m/z* (%) = 259.35 (M+3H, 2.39), 117 (29.02), 87 (26.6), 75 (2.70), 59 (100.0, base peak).

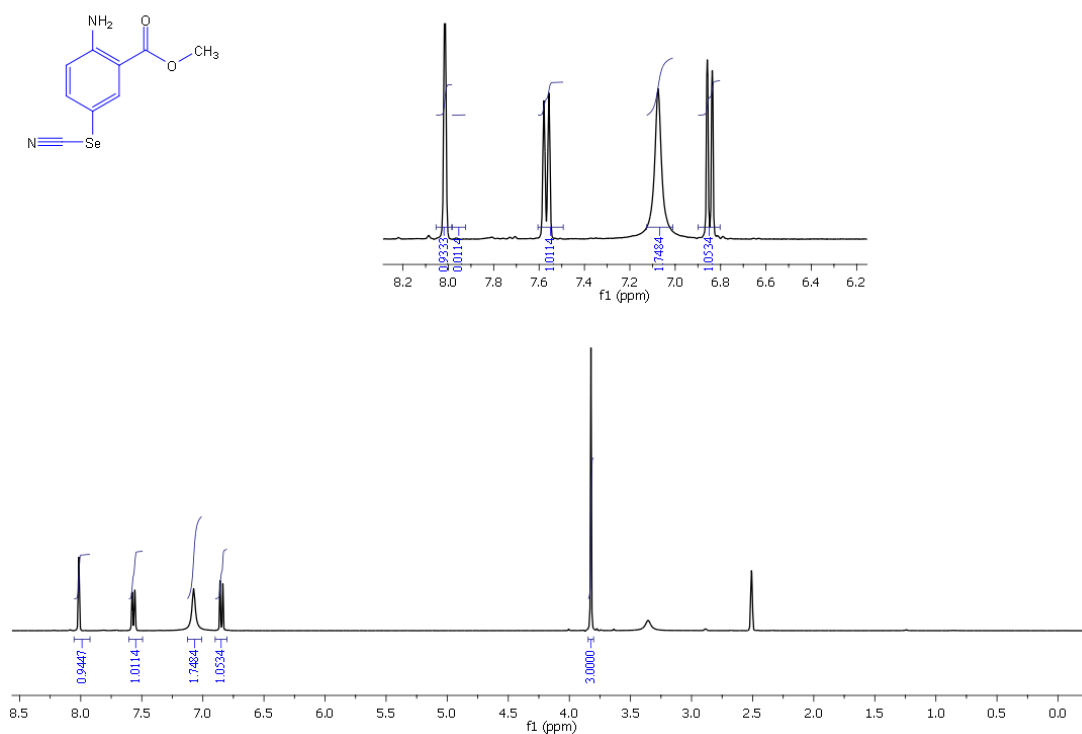

<sup>1</sup>H NMR chart of compound **2**

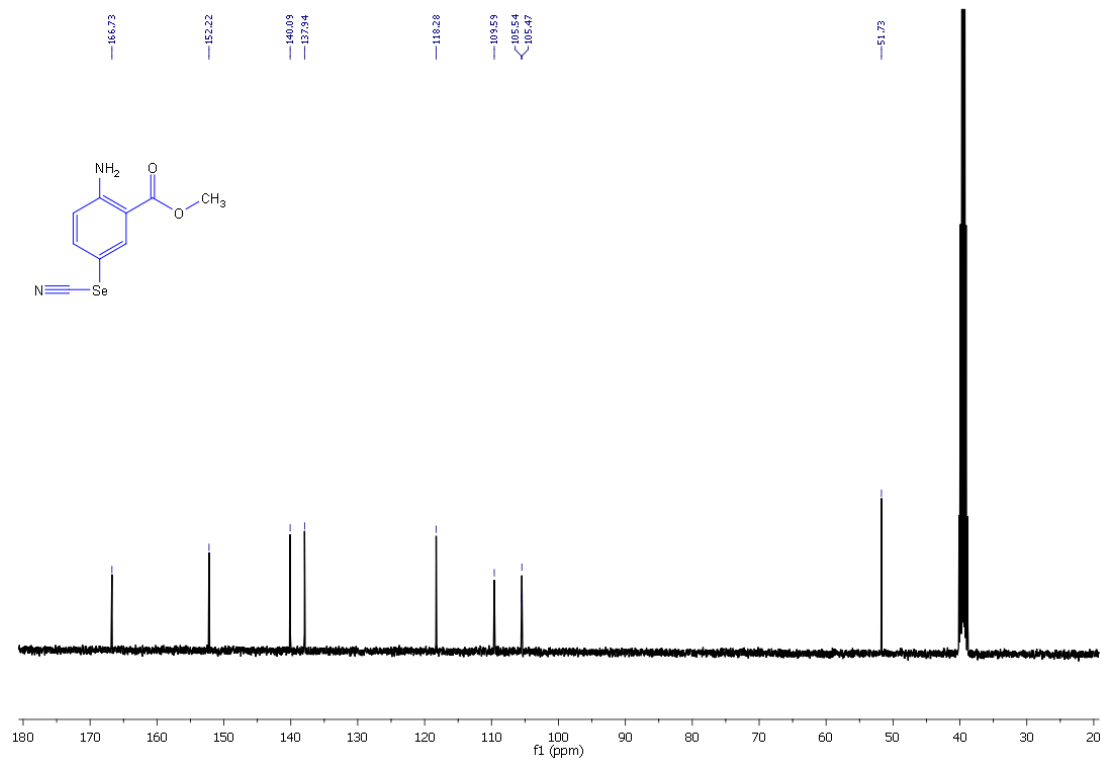

$^{13}\text{C}$ NMR chart of compound **2**

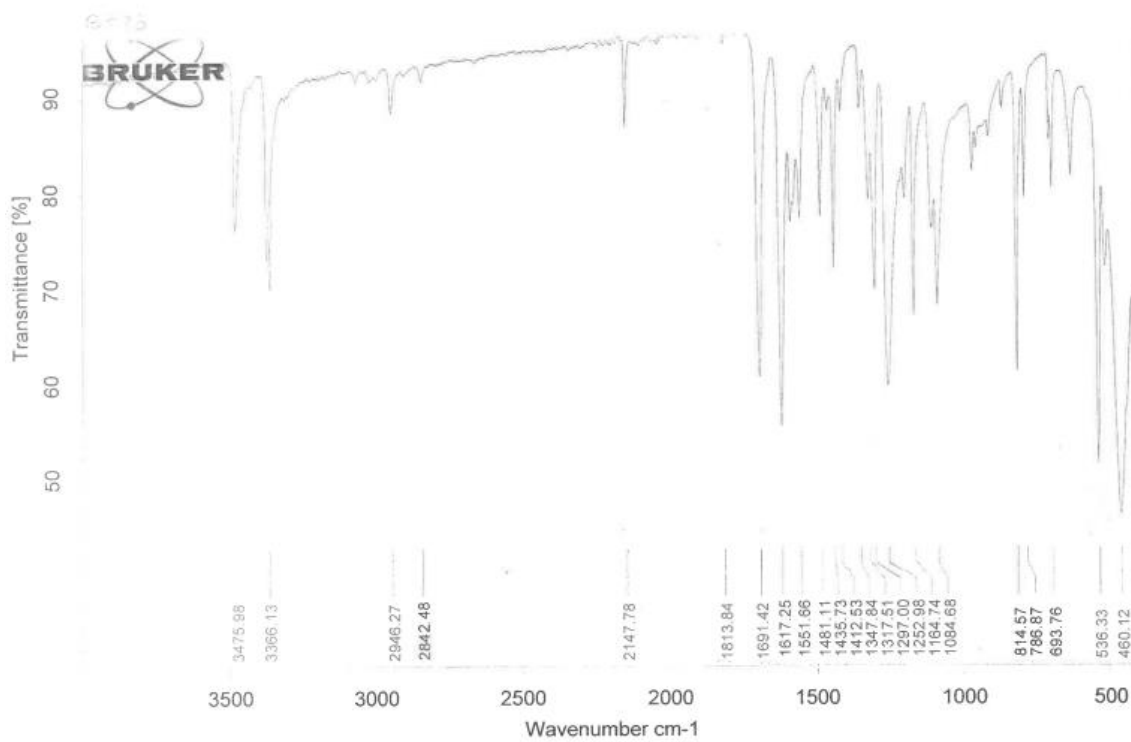

IR chart of compound **2**

# Cairo University Micro Analytical Center

DI Analysis  
Shimadzu Qp-2010 Plus

Sample Information  
Analyzed by: Dr. Mai Younis  
Analyzed: 06/01/2007 07:26:19  
Sample Name: B2  
Sample ID:  
Customer Name: Dr. Mohamed Soliman - Science - Cairo  
Data File: C:\GCM\Solution\Data\Project1\B2.QGD  
Org Data File: C:\GCM\Solution\Data\Project1\B2.QGD  
Method File: C:\GCM\Solution\Data\Project1\High Temperature Op  
Org Method File: C:\GCM\Solution\Data\Project1\High Temperature Op  
Report File:  
Timing File: C:\GCM\Solution\System\Tune1\\_default.qgt  
\$End\$ Modified by: Dr. Mai Younis  
Modified: 06/01/2007 07:32:04

## Method

Analytical Line 1  
IonSourceTemp: 230.00 °C  
[MS Table]  
--Group 1 - Event 1--  
Start Time: 0.00min  
End Time: 10.00min  
ACQ Mode: Scan  
Event Time: 0.50sec  
Scan Speed: 1000  
Start m/z: 50.00  
End m/z: 310.00  
Electron Voltage: 70 eV  
Ionization Mode: EI

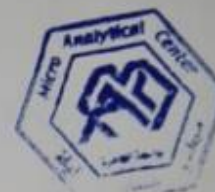

C:\GCM\Solution\Data\Project1\B2.QGD

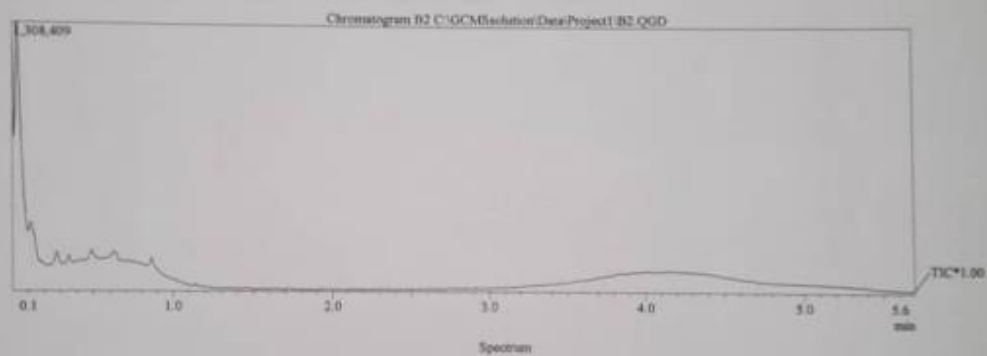

Line# 1 R.Time:4.1(Scan# 490)  
MassPeaks:76  
RawMode:Single 4.1(490) BasePeak:59(21586)  
BG Mode:None Group 1 - Event 1

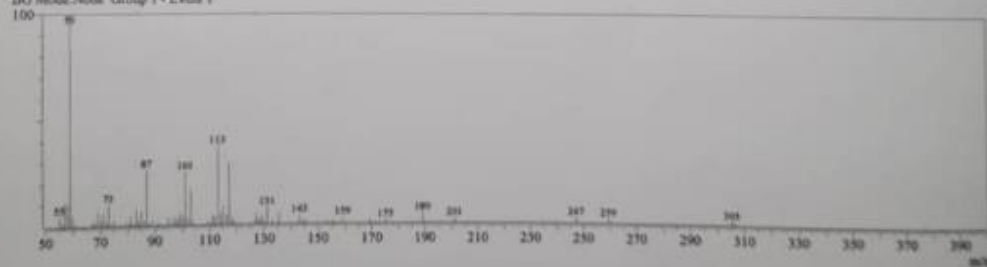

Mass Table  
Line# 1 R.Time:4.1(Scan# 490)  
MassPeaks:76  
RawMode:Single 4.1(490) BasePeak:59(21586)  
BG Mode:None Group 1 - Event 1

| # | m/z   | Abs. In | Rel. Int. | # | m/z   | Abs. In | Rel. Int. | # | m/z   | Abs. In | Rel. Int. |
|---|-------|---------|-----------|---|-------|---------|-----------|---|-------|---------|-----------|
| 1 | 55.05 | 1062    | 4.92      | 4 | 58.05 | 2312    | 10.71     | 7 | 61.00 | 236     | 1.09      |
| 2 | 56.05 | 354     | 1.64      | 5 | 59.00 | 21586   | 100.00    | 8 | 67.10 | 468     | 2.17      |
| 3 | 57.05 | 2418    | 11.20     | 6 | 59.95 | 1083    | 5.02      | 9 | 68.15 | 341     | 1.58      |

Mass chart of compound 2

| #  | m/z   | Abs. Int. | Rel. Int. | #  | m/z    | Abs. Int. | Rel. Int. | #  | m/z    | Abs. Int. | Rel. Int. |
|----|-------|-----------|-----------|----|--------|-----------|-----------|----|--------|-----------|-----------|
| 10 | 69.05 | 1515      | 7.02      | 33 | 97.10  | 945       | 4.38      | 56 | 130.15 | 304       | 1.41      |
| 11 | 70.10 | 633       | 2.93      | 34 | 98.15  | 599       | 2.77      | 57 | 131.10 | 1722      | 7.98      |
| 12 | 71.05 | 1365      | 6.32      | 35 | 99.10  | 1268      | 5.87      | 58 | 133.15 | 432       | 2.00      |
| 13 | 72.05 | 440       | 2.04      | 36 | 100.15 | 840       | 3.89      | 59 | 135.20 | 1132      | 5.24      |
| 14 | 73.00 | 2258      | 10.46     | 37 | 101.10 | 5503      | 25.49     | 60 | 143.10 | 908       | 4.21      |
| 15 | 74.00 | 302       | 1.40      | 38 | 102.15 | 689       | 3.24      | 61 | 144.10 | 210       | 0.97      |
| 16 | 75.05 | 583       | 2.70      | 39 | 103.10 | 3649      | 16.90     | 62 | 145.20 | 492       | 2.28      |
| 17 | 77.00 | 268       | 1.24      | 40 | 104.10 | 322       | 1.49      | 63 | 153.20 | 234       | 1.08      |
| 18 | 79.00 | 223       | 1.03      | 41 | 109.10 | 401       | 1.86      | 64 | 155.20 | 281       | 1.30      |
| 19 | 80.10 | 324       | 1.50      | 42 | 110.10 | 220       | 1.02      | 65 | 159.15 | 662       | 3.07      |
| 20 | 81.10 | 954       | 4.42      | 43 | 111.10 | 969       | 4.49      | 66 | 169.20 | 334       | 1.55      |
| 21 | 82.15 | 315       | 1.46      | 44 | 112.15 | 807       | 3.74      | 67 | 171.20 | 204       | 0.95      |
| 22 | 83.10 | 1628      | 7.54      | 45 | 113.10 | 8084      | 37.45     | 68 | 173.20 | 202       | 0.94      |
| 23 | 84.10 | 481       | 2.23      | 46 | 114.10 | 1199      | 5.55      | 69 | 175.20 | 346       | 1.60      |
| 24 | 85.05 | 1397      | 6.47      | 47 | 115.10 | 2001      | 9.27      | 70 | 189.20 | 1038      | 4.81      |
| 25 | 86.05 | 492       | 2.28      | 48 | 116.25 | 936       | 4.34      | 71 | 201.15 | 502       | 2.33      |
| 26 | 87.05 | 5752      | 26.65     | 49 | 117.15 | 6264      | 29.02     | 72 | 247.20 | 575       | 2.66      |
| 27 | 88.00 | 314       | 1.45      | 50 | 118.15 | 607       | 2.81      | 73 | 259.35 | 515       | 2.39      |
| 28 | 89.05 | 560       | 2.59      | 51 | 119.20 | 271       | 1.26      | 74 | 260.40 | 207       | 0.96      |
| 29 | 91.10 | 327       | 1.51      | 52 | 126.15 | 310       | 1.44      | 75 | 305.40 | 401       | 1.86      |
| 30 | 94.10 | 202       | 0.94      | 53 | 127.10 | 1102      | 5.11      | 76 | 306.40 | 281       | 1.30      |
| 31 | 95.10 | 807       | 3.74      | 54 | 128.15 | 589       | 2.73      |    |        |           |           |
| 32 | 96.10 | 278       | 1.29      | 55 | 129.10 | 740       | 3.43      |    |        |           |           |

*Synthesis of dimethyl 5,5'-diselanediybis(2-aminobenzoate) (3)[6]*

Compound dimethyl 5,5'-diselanediybis(2-aminobenzoate) (**3**) was synthesized from methyl 2-amino-5-selenocyanatobenzoate (4 mmol, 1.00 g) and sodium hydroxide (4 mmol, 1.60 g) in anhydrous ethanol (20 mL). Dimethyl 5,5'-diselanediybis(2-aminobenzoate) (**3**) appeared as a single compound on TLC and was isolated as a yellow solid; yield: 1.69g (92%); m.p. = 138–139°C; R<sub>f</sub> = 0.5 (petroleum ether/ ethyl acetate 4:3, v/v). IR (KBr):  $\nu$ 3455 (N-H), 3344 (N-H), 2931 (C<sub>aliph</sub>-H), 2890 (C<sub>aliph</sub>-H), 2168 (CN), 1684 (C=O), 1560 (C=C), 1603, 1238 (C<sub>Ar</sub>-N), 1079 (C–O), 811, 784 (C-H bending), 699 (C-H rocking), 533 (C-Se);

<sup>1</sup>HNMR (400 MHz, DMSO- *d*<sub>6</sub>)  $\delta$  7.70(s, 2H, Ar-H), 7.44(d, *J* = 8.6 Hz, 2H, Ar-H), 7.00(s, 4H, 2NH<sub>2</sub>), 6.77(d, *J* = 8.6 Hz, 2H, Ar-H), 3.74(s, 6H, 2OCH<sub>3</sub>). <sup>13</sup>CNMR (101 MHz, DMSO- *d*<sub>6</sub>)  $\delta$  167.00, 151.91, 140.57, 138.13, 117.63, 113.57, 108.98, 51.52. MS (EI, 70 ev) *m/z* (%) = 460.15(M+H, 20.76), 459.15(M, 5.20) or 230(24.42), 119(9.45), 91 (100.0, base peak), 65(8.88).

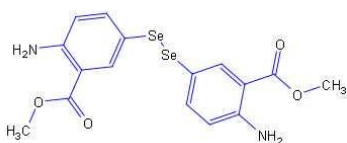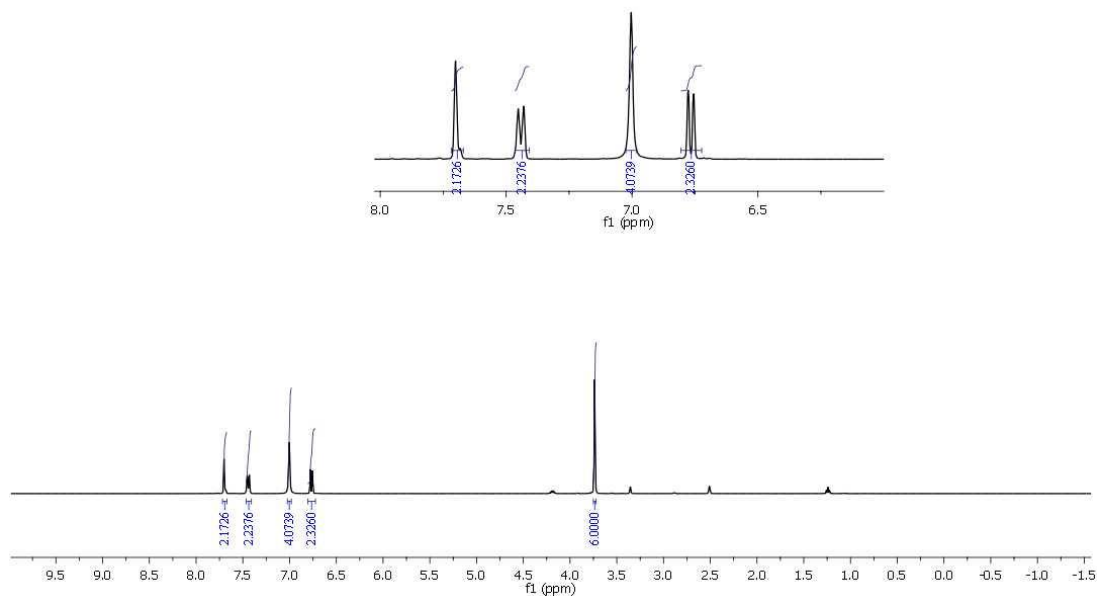

<sup>1</sup>HNMR chart of compound **3**

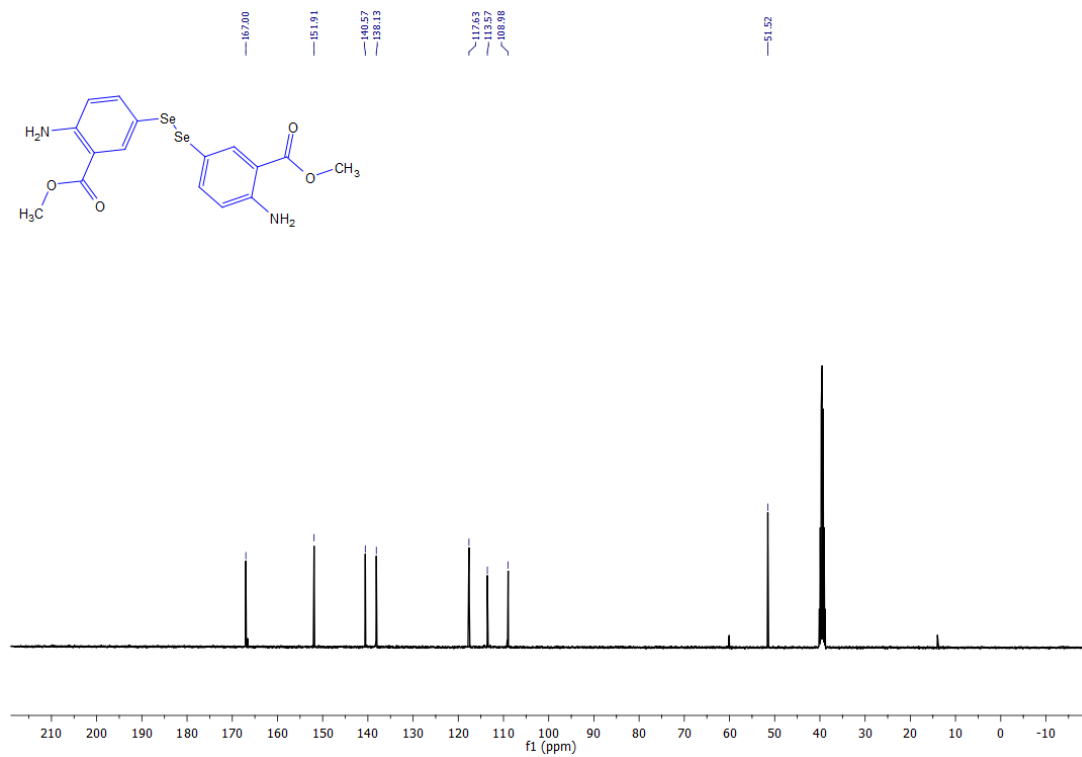

<sup>13</sup>CNMR chart of compound 3

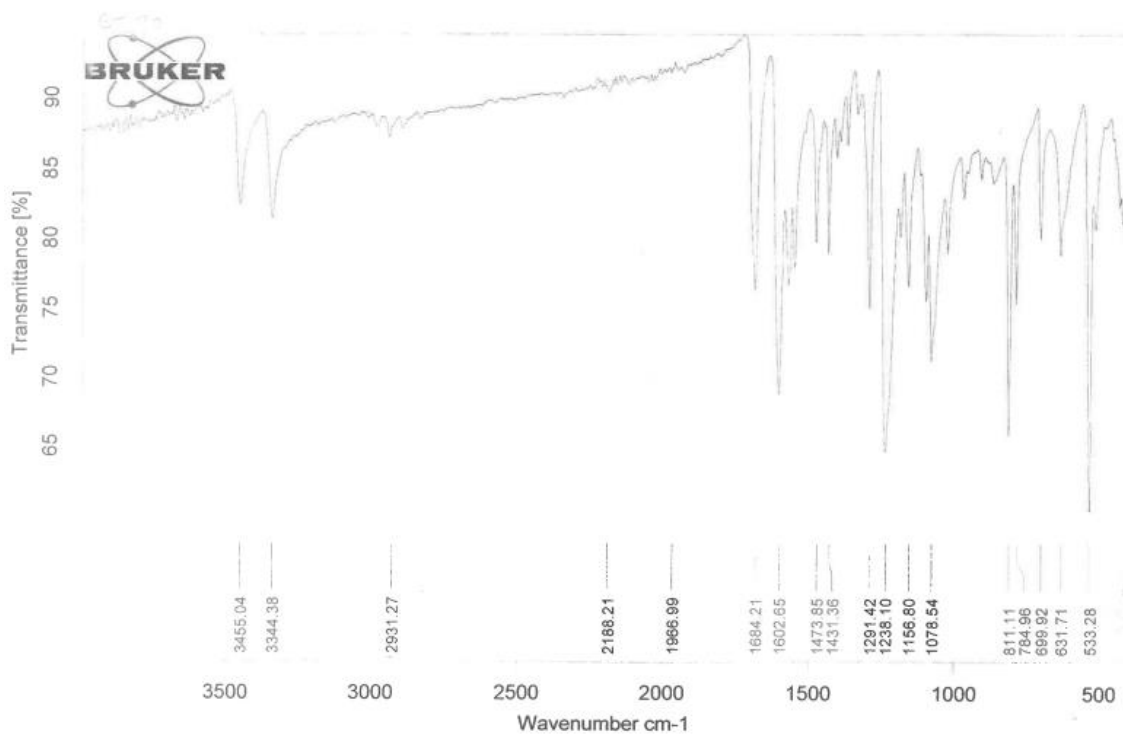

IR chart of compound 3

# Cairo University Micro Analytical Center

## DI Analysis Shimadzu Qp-2010 Plus

**Analyzed by** Dr. Mai Younis  
**Analyzed** 06/01/2007 07:17:06 μ  
**Sample Name** B1  
**Sample ID**  
**Customer Name** Dr. Mohamed Soliman - Science - Cairo  
**Data File** C:\GCMSolution\Data\Project1\B1.QGD  
**Org Data File** C:\GCMSolution\Data\Project1\B1.QGD  
**Method File** C:\GCMSolution\Data\Project1\High Temperature Op  
**Org Method File** C:\GCMSolution\Data\Project1\High Temperature Op  
**Report File**  
**Tuning File** C:\GCMSolution\System\Tune1\default.qgt  
**SEndIfSModified by** Dr. Mai Younis  
**Modified** 06/01/2007 07:22:24 μ

### Method

**Analytical Line 1**  
**IonSourceTemp** :250.00 °C  
**[MS Table]**  
**--Group 1 - Event 1--**  
**Start Time** :0.00min  
**End Time** :10.00min  
**ACQ Mode** :Scan  
**Event Time** :0.50sec  
**Scan Speed** :1000  
**Start m/z** :30.00  
**End m/z** :510.00  
**Electron Voltage** :70 eV  
**Ionization Mode** :EI

C:\GCMSolution\Data\Project1\B1.QGD

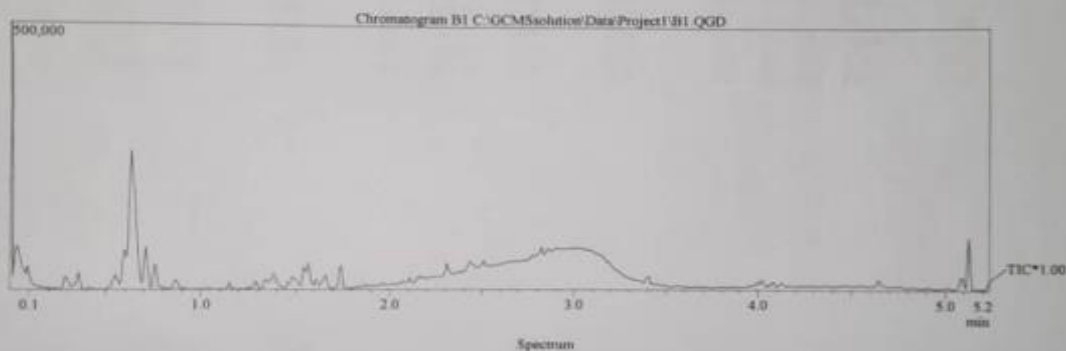

Line#:1 R.Time:2.9(Scan#:352)

MassPeaks:90

RawMode:Single 2.9(352) BasePeak:91(10811)

BG Mode:None Group 1 - Event 1

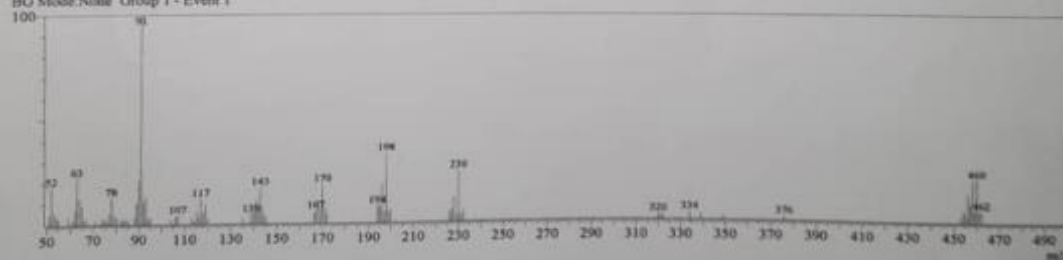

### Mass Table

Line#:1 R.Time:2.9(Scan#:352)

MassPeaks:90

RawMode:Single 2.9(352) BasePeak:91(10811)

BG Mode:None Group 1 - Event 1

| # | m/z   | Abs. In | Rel. Int. | # | m/z   | Abs. In | Rel. Int. | # | m/z   | Abs. In | Rel. Int. |
|---|-------|---------|-----------|---|-------|---------|-----------|---|-------|---------|-----------|
| 1 | 51.05 | 519     | 4.80      | 4 | 54.05 | 471     | 4.36      | 7 | 61.00 | 255     | 2.36      |
| 2 | 51.95 | 1953    | 18.06     | 5 | 55.10 | 305     | 2.82      | 8 | 62.05 | 723     | 6.69      |
| 3 | 53.05 | 620     | 5.73      | 6 | 59.05 | 411     | 3.80      | 9 | 63.00 | 2398    | 22.18     |

| #  | m/z    | Abs. In | Rel. Int. | #  | m/z    | Abs. In | Rel. Int. | #  | m/z    | Abs. In | Rel. Int. |
|----|--------|---------|-----------|----|--------|---------|-----------|----|--------|---------|-----------|
| 10 | 64.05  | 1311    | 12.13     | 37 | 113.00 | 308     | 2.85      | 64 | 198.00 | 3602    | 33.32     |
| 11 | 65.05  | 960     | 8.88      | 38 | 113.90 | 222     | 2.05      | 65 | 199.00 | 591     | 5.47      |
| 12 | 66.00  | 278     | 2.57      | 39 | 114.90 | 636     | 5.88      | 66 | 200.05 | 690     | 6.38      |
| 13 | 67.00  | 247     | 2.28      | 40 | 116.05 | 385     | 3.56      | 67 | 226.05 | 505     | 4.67      |
| 14 | 71.00  | 202     | 1.87      | 41 | 117.00 | 1319    | 12.20     | 68 | 227.05 | 655     | 6.06      |
| 15 | 74.00  | 313     | 2.90      | 42 | 118.05 | 599     | 5.54      | 69 | 228.00 | 1222    | 11.30     |
| 16 | 75.00  | 255     | 2.36      | 43 | 119.10 | 1022    | 9.45      | 70 | 229.15 | 316     | 2.92      |
| 17 | 76.00  | 214     | 1.98      | 44 | 120.10 | 310     | 2.87      | 71 | 230.05 | 2640    | 24.42     |
| 18 | 77.05  | 571     | 5.28      | 45 | 135.10 | 289     | 2.67      | 72 | 231.05 | 347     | 3.21      |
| 19 | 78.05  | 1366    | 12.64     | 46 | 139.00 | 482     | 4.46      | 73 | 232.05 | 594     | 5.49      |
| 20 | 79.10  | 466     | 4.31      | 47 | 140.00 | 614     | 5.68      | 74 | 320.00 | 290     | 2.68      |
| 21 | 80.10  | 388     | 3.59      | 48 | 141.05 | 1196    | 11.06     | 75 | 321.00 | 222     | 2.05      |
| 22 | 82.10  | 233     | 2.16      | 49 | 142.05 | 619     | 5.73      | 76 | 322.00 | 228     | 2.11      |
| 23 | 83.10  | 260     | 2.40      | 50 | 143.00 | 1894    | 17.52     | 77 | 334.00 | 398     | 3.68      |
| 24 | 84.10  | 220     | 2.03      | 51 | 144.00 | 850     | 7.86      | 78 | 339.00 | 318     | 2.94      |
| 25 | 85.10  | 278     | 2.57      | 52 | 144.95 | 409     | 3.78      | 79 | 349.00 | 230     | 2.13      |
| 26 | 88.05  | 377     | 3.49      | 53 | 166.05 | 493     | 4.56      | 80 | 376.00 | 215     | 1.99      |
| 27 | 89.05  | 1081    | 10.00     | 54 | 167.05 | 639     | 5.91      | 81 | 453.00 | 263     | 2.43      |
| 28 | 90.05  | 2287    | 21.15     | 55 | 168.05 | 1148    | 10.62     | 82 | 454.20 | 604     | 5.59      |
| 29 | 91.05  | 10811   | 100.00    | 56 | 169.15 | 688     | 6.36      | 83 | 455.20 | 425     | 3.93      |
| 30 | 92.05  | 1150    | 10.64     | 57 | 170.05 | 2031    | 18.79     | 84 | 456.25 | 1479    | 13.68     |
| 31 | 92.95  | 1429    | 13.22     | 58 | 171.10 | 802     | 7.42      | 85 | 457.20 | 1015    | 9.39      |
| 32 | 94.00  | 254     | 2.35      | 59 | 172.10 | 420     | 3.88      | 86 | 458.20 | 2169    | 20.06     |
| 33 | 95.00  | 354     | 3.27      | 60 | 194.05 | 863     | 7.98      | 87 | 459.15 | 562     | 5.20      |
| 34 | 104.00 | 249     | 2.30      | 61 | 195.05 | 858     | 7.94      | 88 | 460.15 | 2244    | 20.76     |
| 35 | 106.10 | 398     | 3.68      | 62 | 196.00 | 1993    | 18.43     | 89 | 461.15 | 521     | 4.82      |
| 36 | 107.00 | 444     | 4.11      | 63 | 197.05 | 575     | 5.32      | 90 | 462.10 | 618     | 5.72      |

Mass chart of compound 3

*Synthesis of methyl 2-amino-5-(methylselanyl) benzoate (4)[6]*

Compound **4** was synthesized from dimethyl 5,5'-diselanediybis (2-aminobenzoate) (**3**)(2 mmol, 916 mg) and methyl iodide (4.4 mmol, 0.27 mL). It was isolated as brown oil; yield: 402 mg (82%);  $R_f=0.6$ (petroleum ether/ ethyl acetate 4:2, v/v). IR(KBr):  $\nu_{3474}$  (N-H),  $\nu_{3364}$  (N-H),  $\nu_{2948}$  (C<sub>aliph</sub>-H),  $\nu_{2926}$  (C<sub>aliph</sub>-H),  $\nu_{1686}$  (C=O),  $\nu_{1607}$ ,  $\nu_{1292}$  (C<sub>Ar</sub>-N),  $\nu_{1110}$  (C-O),  $\nu_{815}$ ,  $\nu_{789}$ ,  $\nu_{696}$  (C-H bending),  $\nu_{559}$  (C-Se);  $^1\text{H NMR}$  (400 MHz, DMSO-  $d_6$ )  $\delta$  7.82(s, 1H, Ar-H), 7.40(d,  $J = 8.6$  Hz, 1H, Ar-H), 6.77(d,  $J = 8.6$  Hz, 1H, Ar-H), 6.75(s, 2H, NH<sub>2</sub>), 3.62(s, 3H, OCH<sub>3</sub>), 2.22 (s, 3H, CH<sub>3</sub>).  $^{13}\text{C NMR}$  (101 MHz, DMSO-  $d_6$ )  $\delta$  167.70, 151.00, 138.90, 135.03, 118.21, 113.98, 109.87, 51.98, 9.17. MS (EI, 70 ev)  $m/z$  (%) = 245.10(M, 100.0, base peak), 230(38.06), 186(10.46), 170(35.08), 91(91.10).

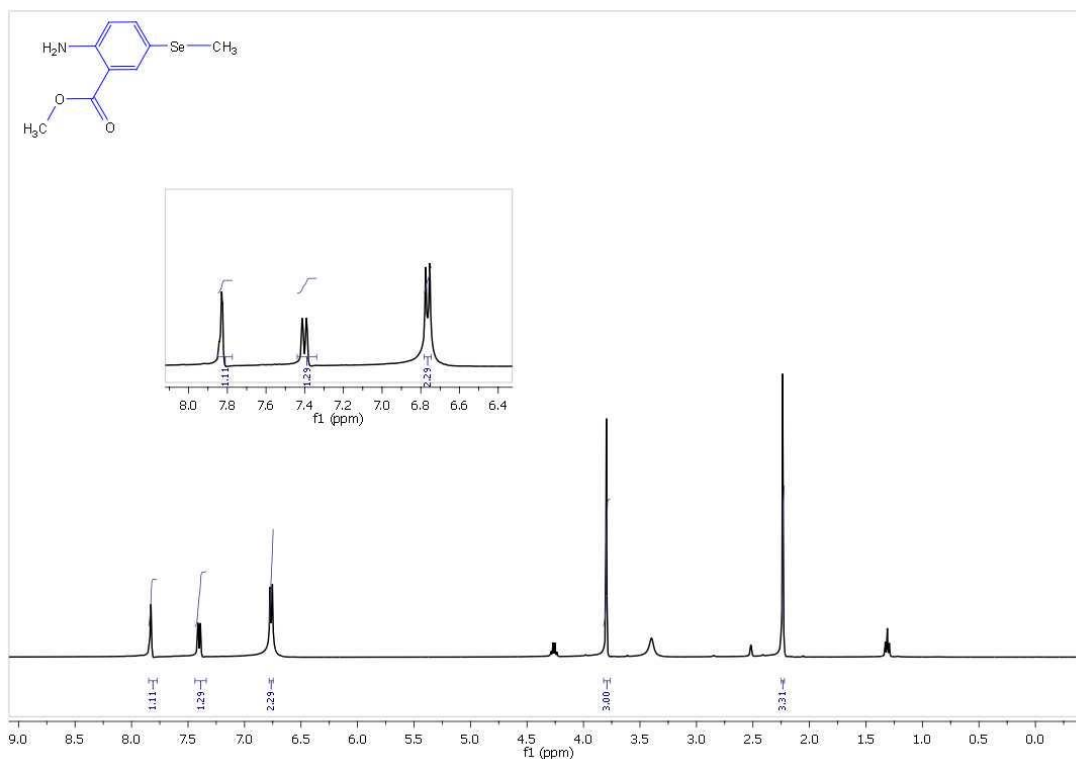

$^1\text{H NMR}$  chart of compound **4**

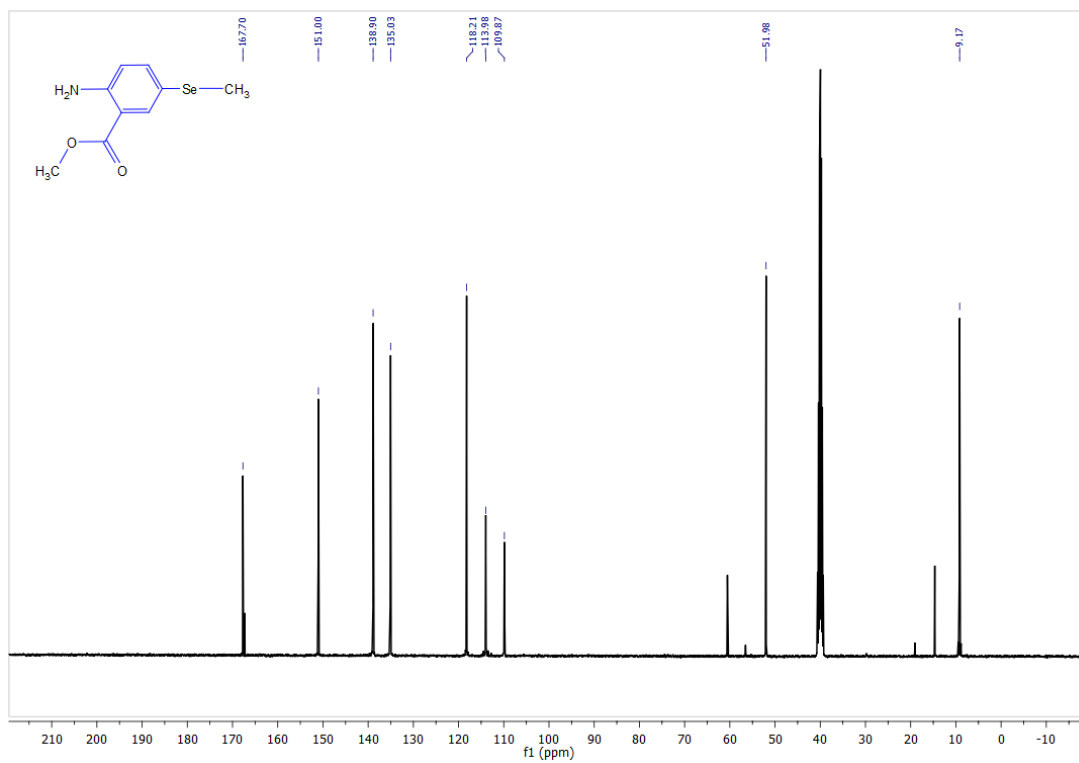

$^{13}\text{C}$ NMR chart of compound **4**

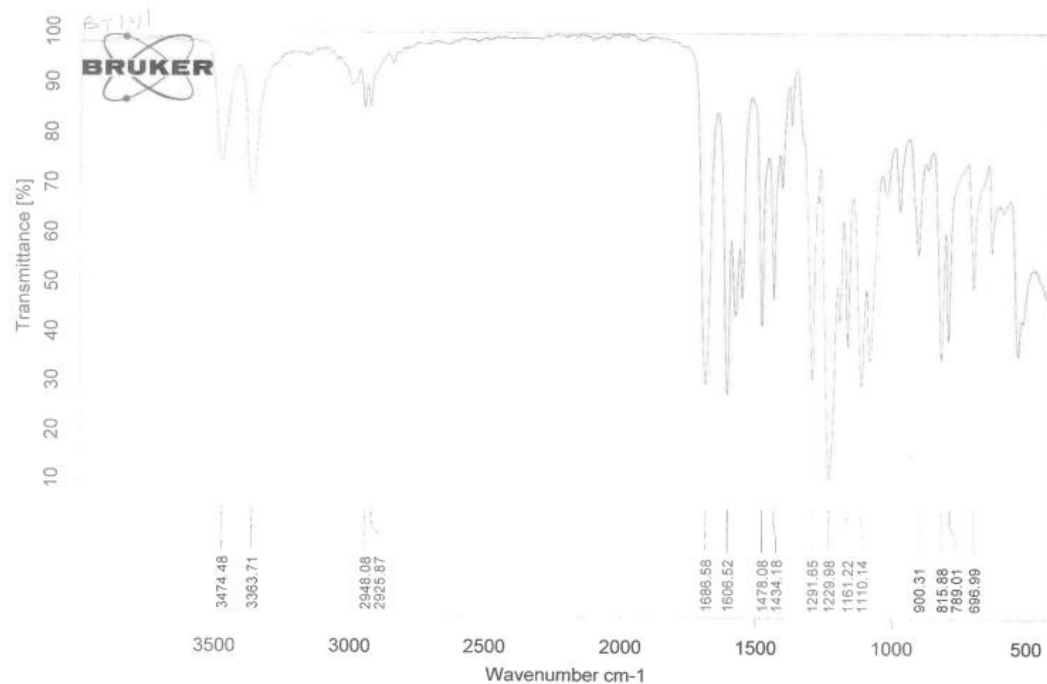

C:\Documents and Settings\adminuser\Desktop\New Folder (2)\test 1.1553

1

Instrument type and / or accessory

11/18/2021

Page 1/1

IR chart of compound 4

# Cairo University Micro Analytical Center

## DI Analysis Shimadzu Qp-2010 Plus

Sample Information  
 Analyzed by: Dr. Mai Younis  
 Analyzed: 16/01/2007 03:02:11  
 Sample Name: B35  
 Sample ID:  
 Customer Name: Dr. Mohamed Soliman - Science - Cairo  
 Data File: C:\GCMSolution\Data\Project1\B35.QGD  
 Org Data File: C:\GCMSolution\Data\Project1\B35.QGD  
 Method File: C:\GCMSolution\Data\Project1\High Temperature Op  
 Org Method File: C:\GCMSolution\Data\Project1\High Temperature Op  
 Report File:  
 Tuning File: C:\GCMSolution\System\Tune1\_default.agt  
 Standard Modified by: Dr. Mai Younis  
 Modified: 16/01/2007 03:12:11

Method  
 Analytical Line 1  
 IonSourceTemp: 250.00 °C  
 [MS Table]  
 --Group 1 - Event 1--  
 Start Time: 0.00min  
 End Time: 10.00min  
 ACQ Mode: Scan  
 Event Time: 0.50sec  
 Scan Speed: 1000  
 Start m/z: 50.00  
 End m/z: 510.00  
 Electron Voltage: 70 eV  
 Ionization Mode: EI

C:\GCMSolution\Data\Project1\B35.QGD

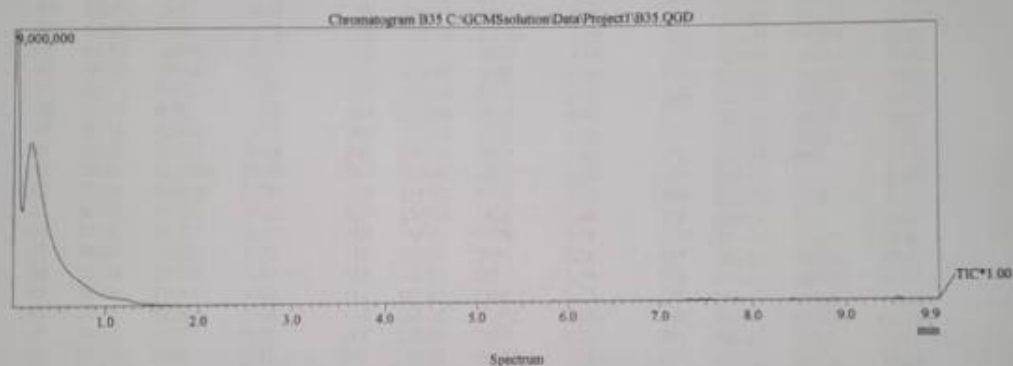

Line# 1 R.Time:0.2(Scan# 26)  
 MassPeaks:205  
 RawMode:Single 0.2(26) BasePeak:245(391154)  
 BG Mode:None Group 1 - Event 1

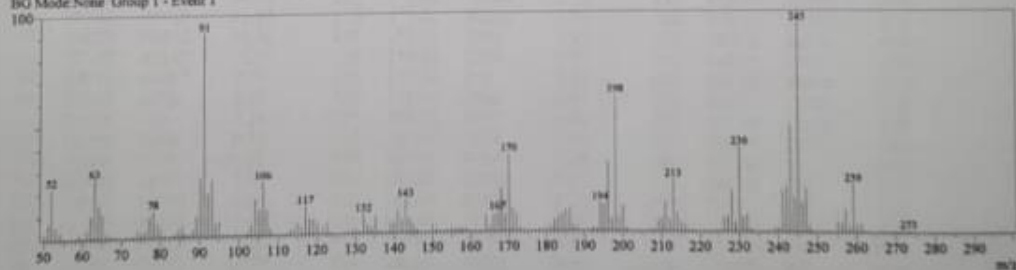

Mass Table  
 Line# 1 R.Time:0.2(Scan# 26)  
 MassPeaks:205  
 RawMode:Single 0.2(26) BasePeak:245(391154)  
 BG Mode:None Group 1 - Event 1

| # | m/z   | Abs. In | Rel. Int. | # | m/z   | Abs. In | Rel. Int. | # | m/z   | Abs. In | Rel. Int. |
|---|-------|---------|-----------|---|-------|---------|-----------|---|-------|---------|-----------|
| 1 | 50.05 | 10411   | 2.66      | 4 | 53.00 | 21482   | 5.49      | 7 | 56.05 | 488     | 0.12      |
| 2 | 51.05 | 26260   | 6.71      | 5 | 54.05 | 11184   | 2.86      | 8 | 57.05 | 709     | 0.18      |
| 3 | 52.00 | 89298   | 22.83     | 6 | 55.00 | 2246    | 0.57      | 9 | 58.05 | 1164    | 0.30      |

Mass chart of compound 4

| #  | m/z    | Abs. In | Rel. Int. | #   | m/z    | Abs. In | Rel. Int. | #   | m/z    | Abs. In | Rel. Int. |
|----|--------|---------|-----------|-----|--------|---------|-----------|-----|--------|---------|-----------|
| 10 | 59.00  | 6150    | 1.57      | 76  | 126.05 | 2179    | 0.56      | 142 | 195.00 | 47017   | 12.02     |
| 11 | 60.05  | 1575    | 0.40      | 77  | 127.05 | 3204    | 0.82      | 143 | 196.00 | 122146  | 31.23     |
| 12 | 61.05  | 14415   | 3.69      | 78  | 128.00 | 4023    | 1.03      | 144 | 197.05 | 22307   | 5.70      |
| 13 | 62.05  | 39733   | 10.16     | 79  | 129.05 | 5617    | 1.44      | 145 | 198.00 | 241660  | 61.78     |
| 14 | 63.05  | 103836  | 26.55     | 80  | 130.00 | 7762    | 1.98      | 146 | 198.95 | 25629   | 6.55      |
| 15 | 64.05  | 57318   | 14.65     | 81  | 131.15 | 4478    | 1.14      | 147 | 200.00 | 43719   | 11.18     |
| 16 | 65.05  | 43819   | 11.20     | 82  | 132.10 | 33902   | 8.67      | 148 | 200.95 | 4204    | 1.07      |
| 17 | 66.10  | 9838    | 2.52      | 83  | 133.10 | 15628   | 4.00      | 149 | 201.95 | 533     | 0.14      |
| 18 | 67.05  | 4572    | 1.17      | 84  | 134.15 | 8746    | 2.24      | 150 | 207.00 | 2228    | 0.57      |
| 19 | 68.05  | 2933    | 0.75      | 85  | 135.10 | 31116   | 7.95      | 151 | 208.05 | 2526    | 0.65      |
| 20 | 69.10  | 1041    | 0.27      | 86  | 136.15 | 5476    | 1.40      | 152 | 209.05 | 20084   | 5.13      |
| 21 | 70.05  | 837     | 0.21      | 87  | 137.00 | 2783    | 0.71      | 153 | 210.05 | 23473   | 6.00      |
| 22 | 71.05  | 1646    | 0.42      | 88  | 138.05 | 3352    | 0.86      | 154 | 211.00 | 50268   | 12.85     |
| 23 | 72.05  | 1669    | 0.43      | 89  | 139.00 | 15473   | 3.96      | 155 | 212.05 | 22070   | 5.64      |
| 24 | 72.95  | 2952    | 0.75      | 90  | 140.00 | 17660   | 4.51      | 156 | 213.00 | 91327   | 23.35     |
| 25 | 74.05  | 12141   | 3.10      | 91  | 141.00 | 39022   | 9.98      | 157 | 214.00 | 31220   | 7.98      |
| 26 | 75.10  | 10198   | 2.61      | 92  | 142.05 | 21311   | 5.45      | 158 | 215.00 | 18164   | 4.64      |
| 27 | 76.10  | 12385   | 3.17      | 93  | 143.00 | 58711   | 15.01     | 159 | 216.00 | 12508   | 3.20      |
| 28 | 77.10  | 36498   | 9.33      | 94  | 144.00 | 25175   | 6.44      | 160 | 216.95 | 1191    | 0.30      |
| 29 | 78.05  | 47310   | 12.09     | 95  | 145.00 | 13801   | 3.53      | 161 | 218.00 | 1618    | 0.41      |
| 30 | 79.10  | 24441   | 6.25      | 96  | 146.00 | 5042    | 1.29      | 162 | 224.00 | 2599    | 0.66      |
| 31 | 80.00  | 15313   | 3.91      | 97  | 147.00 | 1039    | 0.27      | 163 | 225.05 | 1510    | 0.39      |
| 32 | 81.00  | 4794    | 1.23      | 98  | 148.10 | 804     | 0.21      | 164 | 226.05 | 26426   | 6.76      |
| 33 | 82.55  | 1873    | 0.48      | 99  | 149.15 | 1515    | 0.39      | 165 | 227.05 | 28172   | 7.20      |
| 34 | 83.55  | 6981    | 1.78      | 100 | 150.10 | 13154   | 3.36      | 166 | 228.05 | 72774   | 18.60     |
| 35 | 84.55  | 13095   | 3.35      | 101 | 151.10 | 4439    | 1.13      | 167 | 229.05 | 16399   | 4.19      |
| 36 | 85.50  | 19868   | 5.08      | 102 | 151.95 | 1797    | 0.46      | 168 | 230.05 | 148867  | 38.06     |
| 37 | 86.10  | 5970    | 1.53      | 103 | 153.00 | 3161    | 0.81      | 169 | 231.00 | 25292   | 6.47      |
| 38 | 87.05  | 4792    | 1.23      | 104 | 154.00 | 3514    | 0.90      | 170 | 232.05 | 29923   | 7.65      |
| 39 | 88.10  | 12948   | 3.31      | 105 | 155.00 | 5122    | 1.31      | 171 | 233.00 | 4730    | 1.21      |
| 40 | 89.10  | 37161   | 9.50      | 106 | 156.00 | 4514    | 1.15      | 172 | 233.95 | 605     | 0.15      |
| 41 | 90.15  | 101589  | 25.97     | 107 | 157.05 | 6492    | 1.66      | 173 | 238.15 | 734     | 0.19      |
| 42 | 91.10  | 358905  | 91.76     | 108 | 158.00 | 3975    | 1.02      | 174 | 239.10 | 6298    | 1.61      |
| 43 | 92.05  | 75198   | 19.22     | 109 | 159.00 | 5625    | 1.44      | 175 | 240.15 | 7887    | 2.02      |
| 44 | 93.00  | 97377   | 24.89     | 110 | 160.00 | 1470    | 0.38      | 176 | 241.10 | 72847   | 18.62     |
| 45 | 94.00  | 22561   | 5.77      | 111 | 161.00 | 1084    | 0.28      | 177 | 242.10 | 80234   | 20.51     |
| 46 | 95.00  | 26670   | 6.82      | 112 | 162.00 | 380     | 0.10      | 178 | 243.10 | 187193  | 47.86     |
| 47 | 96.00  | 4114    | 1.05      | 113 | 163.15 | 1307    | 0.33      | 179 | 244.15 | 60066   | 15.36     |
| 48 | 97.05  | 4225    | 1.08      | 114 | 164.10 | 28951   | 7.40      | 180 | 245.10 | 391154  | 100.00    |
| 49 | 98.35  | 2449    | 0.63      | 115 | 165.05 | 9689    | 2.48      | 181 | 246.05 | 51306   | 13.12     |
| 50 | 99.30  | 3386    | 0.87      | 116 | 166.00 | 30183   | 7.72      | 182 | 247.05 | 74480   | 19.04     |
| 51 | 100.25 | 1374    | 0.35      | 117 | 167.05 | 33926   | 8.67      | 183 | 248.05 | 8926    | 2.28      |
| 52 | 101.05 | 1757    | 0.45      | 118 | 168.00 | 75583   | 19.32     | 184 | 249.05 | 953     | 0.24      |
| 53 | 102.10 | 5450    | 1.39      | 119 | 169.05 | 30276   | 7.74      | 185 | 253.10 | 1460    | 0.37      |
| 54 | 103.15 | 15671   | 4.01      | 120 | 170.00 | 137220  | 35.08     | 186 | 254.15 | 1011    | 0.26      |
| 55 | 104.15 | 62814   | 16.06     | 121 | 171.00 | 40180   | 10.27     | 187 | 255.10 | 15329   | 3.92      |
| 56 | 105.25 | 45718   | 11.69     | 122 | 172.00 | 30348   | 7.76      | 188 | 256.15 | 16105   | 4.12      |
| 57 | 106.20 | 94842   | 24.25     | 123 | 173.00 | 7290    | 1.86      | 189 | 257.10 | 40538   | 10.36     |
| 58 | 107.15 | 45188   | 11.55     | 124 | 174.00 | 1239    | 0.32      | 190 | 258.15 | 9549    | 2.44      |
| 59 | 108.15 | 10687   | 2.73      | 125 | 177.20 | 238     | 0.06      | 191 | 259.10 | 84319   | 21.56     |
| 60 | 109.05 | 2089    | 0.53      | 126 | 178.15 | 3162    | 0.81      | 192 | 260.05 | 12047   | 3.08      |
| 61 | 110.05 | 710     | 0.18      | 127 | 179.05 | 1817    | 0.46      | 193 | 261.10 | 15478   | 3.96      |
| 62 | 111.05 | 1314    | 0.34      | 128 | 180.00 | 3514    | 0.90      | 194 | 262.05 | 2350    | 0.60      |
| 63 | 112.05 | 1199    | 0.31      | 129 | 181.05 | 9794    | 2.50      | 195 | 263.05 | 335     | 0.09      |
| 64 | 113.00 | 7610    | 1.95      | 130 | 182.00 | 19970   | 5.11      | 196 | 264.10 | 220     | 0.06      |
| 65 | 114.00 | 10354   | 2.65      | 131 | 183.00 | 25158   | 6.43      | 197 | 269.15 | 730     | 0.19      |
| 66 | 115.00 | 21430   | 5.48      | 132 | 184.00 | 31201   | 7.98      | 198 | 270.15 | 629     | 0.16      |
| 67 | 116.05 | 12818   | 3.28      | 133 | 185.00 | 38050   | 9.73      | 199 | 271.15 | 1493    | 0.38      |
| 68 | 117.05 | 50031   | 12.79     | 134 | 186.00 | 40924   | 10.46     | 200 | 272.25 | 533     | 0.14      |
| 69 | 118.05 | 27671   | 7.07      | 135 | 187.00 | 10028   | 2.56      | 201 | 273.15 | 2823    | 0.72      |
| 70 | 119.10 | 26692   | 6.82      | 136 | 188.00 | 6714    | 1.72      | 202 | 274.20 | 558     | 0.14      |
| 71 | 120.10 | 18391   | 4.70      | 137 | 189.00 | 868     | 0.22      | 203 | 275.20 | 654     | 0.17      |
| 72 | 121.55 | 12099   | 3.09      | 138 | 191.05 | 296     | 0.08      | 204 | 276.20 | 290     | 0.07      |
| 73 | 122.60 | 19750   | 5.05      | 139 | 192.00 | 4826    | 1.23      | 205 | 277.10 | 369     | 0.09      |
| 74 | 123.55 | 4338    | 1.11      | 140 | 193.05 | 2875    | 0.74      |     |        |         |           |
| 75 | 125.05 | 1061    | 0.27      | 141 | 194.00 | 49812   | 12.73     |     |        |         |           |

Mass chart of compound 4

*Synthesis of methyl 2-amino-5-(benzylselanyl) benzoate (5)[6]*

Compound **5** was synthesized from dimethyl 5,5'-diselanediybis(2-aminobenzoate) (**3**) (2mmol, 916 mg) and benzyl chloride (4.4 mmol, 0.50 mL). It was isolated as light brown solid; yield: 597 mg (93%); m.p. = 78°C; R<sub>f</sub> = 0.6 (petroleum ether/ ethyl acetate 4:3, v/v). IR (KBr): ν 3462 (N-H), 3353 (N-H), 2977 (C<sub>aliph</sub>-H), 2946 (C<sub>aliph</sub>-H), 1672 (C=O), 1621, 1436, 1234 (C<sub>Ar</sub>-N), 1114 (C-O), 810 (C-H bending), 692 (C-H rocking), 595 (C-Se); <sup>1</sup>H NMR (400 MHz, DMSO- *d*<sub>6</sub>) δ 7.70 (s, 1H, Ar-H), 7.30 (d, *J* = 8.6 Hz, 1H, Ar-H), 7.23 (dd, *J* = 8.6 Hz, *J* = 2.1 Hz, 2H, Ar-H), 7.19 (d, *J* = 8.7 Hz, 2H, Ar-H), 7.14 (d, *J* = 8.6 Hz, 2H, Ar-H), 6.82 (s, 2H, NH<sub>2</sub>), 4.00 (s, 2H, SeCH<sub>2</sub>), 3.77 (s, 3H, OCH<sub>3</sub>); <sup>13</sup>C NMR (101 MHz, DMSO- *d*<sub>6</sub>) δ 167.69, 151.53, 141.06, 139.66, 137.95, 129.24, 128.65, 126.98, 117.87, 112.42, 109.68, 51.94, 32.75. MS (EI, 70 ev) *m/z* (%) = 321.20 (M, 46.87), 244.10 (2.77), 230 (34.88), 150.15 (1.02), 91.05 (100.0, base peak).

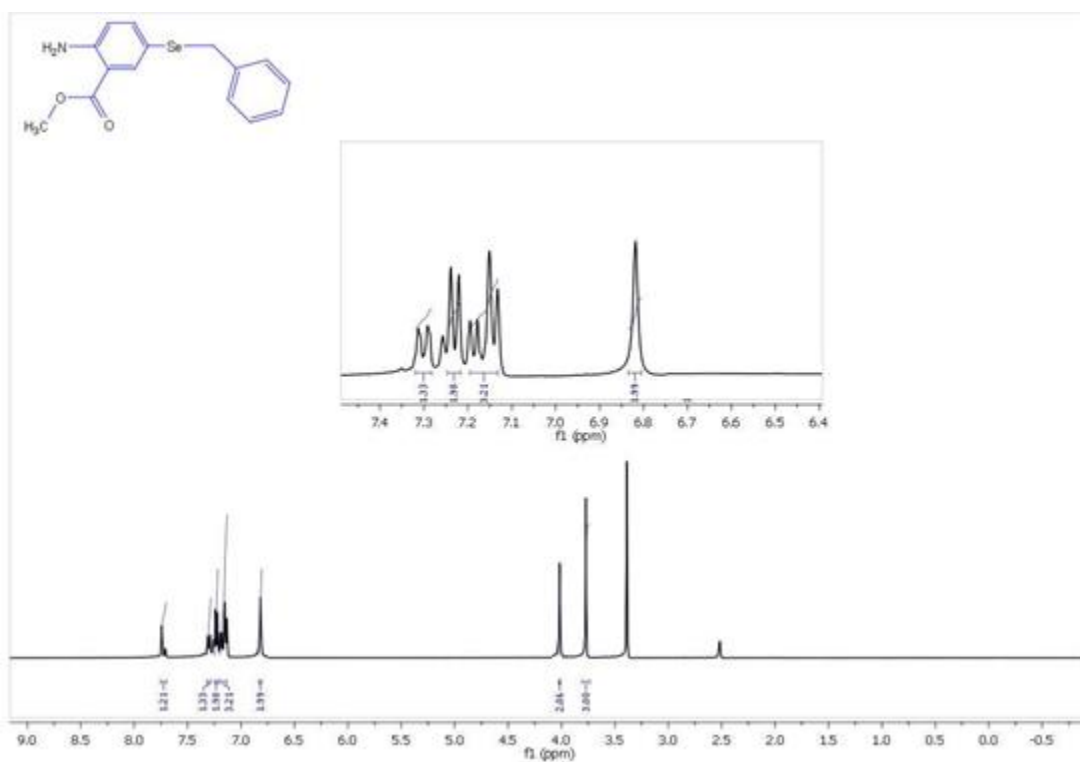

<sup>1</sup>H NMR chart of compound **5**

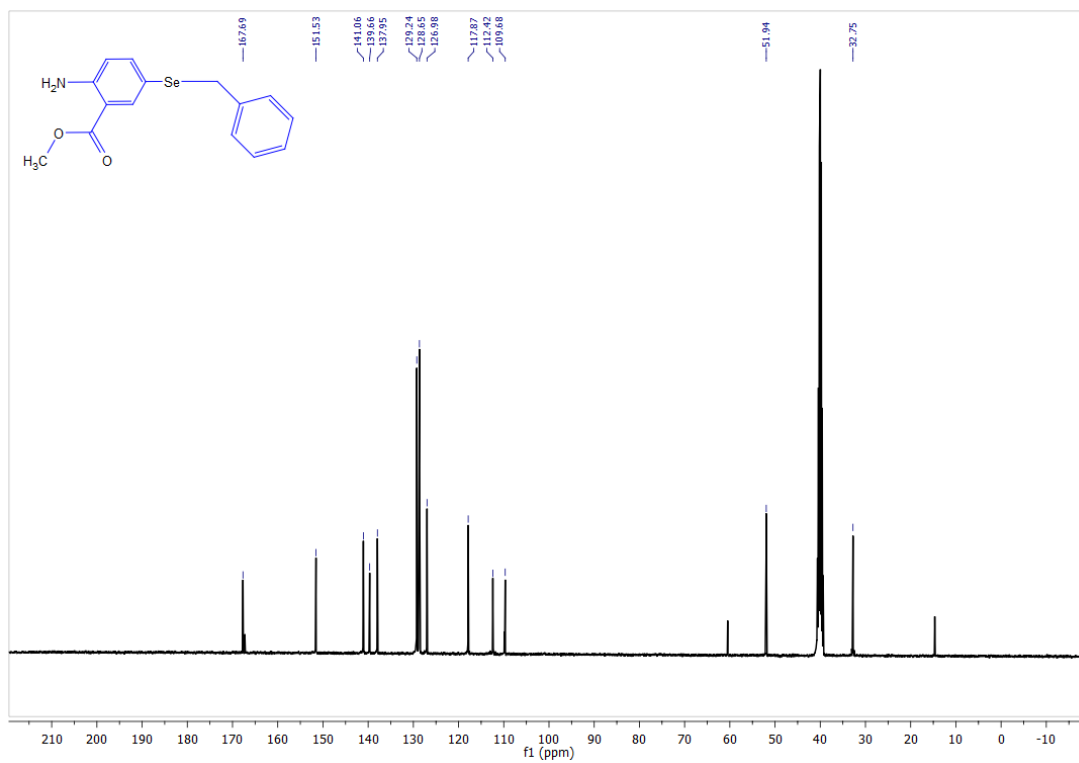

$^{13}\text{C}$ NMR chart of compound **5**

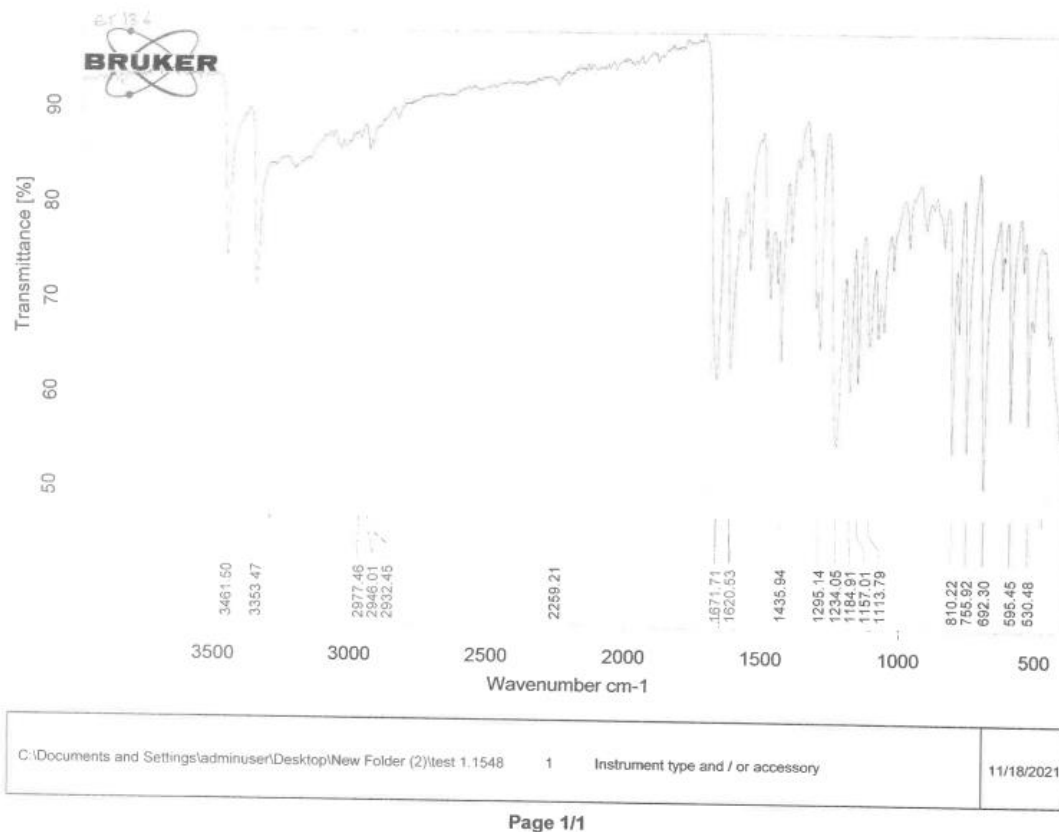

IR chart of compound 5

# Cairo University Micro Analytical Center

## DI Analysis Shimadzu Qp-2010 Plus

**Sample Information**  
 Analyzed by: Dr. Mai Younis  
 Analyzed: 06/01/2007 07:49:46  
 Sample Name: B22  
 Sample ID:  
 Customer Name: Dr. Mohamed Soliman - Science - Cairo  
 Data File: C:\GCM\Software\Data\Project1\B22.QGD  
 Org Data File: C:\GCM\Software\Data\Project1\B22.QGD  
 Method File: C:\GCM\Software\Data\Project1\High Temperature Op  
 Org Method File: C:\GCM\Software\Data\Project1\High Temperature Op  
 Report File:  
 Tuning File: C:\GCM\Software\System\Tune1\default.qgt  
 \$EndIf\$Modified by: Dr. Mai Younis  
 Modified: 06/01/2007 07:51:49

**Method**  
 Analytical Line 1  
 IonSourceTemp: 250.00 °C  
 [MS Table]  
 ~Group 1 - Event 1~  
 Scan Time: 0.00min  
 End Time: 10.00min  
 ACQ Mode: Scan  
 Event Time: 0.50sec  
 Scan Speed: 1000  
 Start m/z: 50.00  
 End m/z: 510.00  
 Electron Voltage: 70 eV  
 Ionization Mode: EI

C:\GCM\Software\Data\Project1\B22.QGD

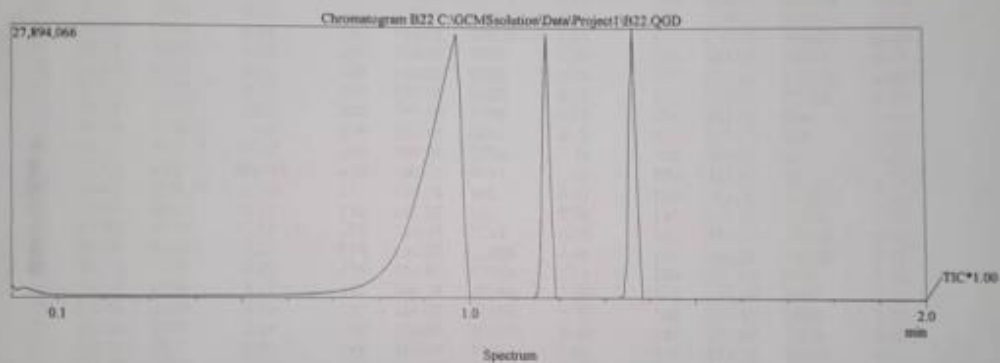

Line# 1 R.Time: 1.2 (Scan# 143)  
 MassPeaks: 244 (Peak Elimination m/z: 423.20, 425.30)  
 RawMode: Single 1.2 (143) BasePeak: 91 (2025185)  
 BG Mode: None Group 1 - Event 1

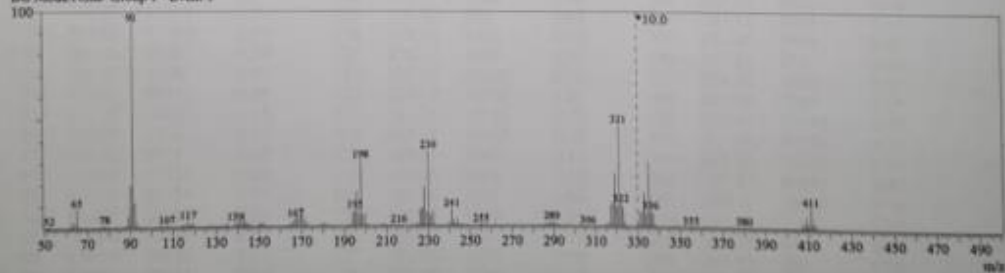

### Mass Table

Line# 1 R.Time: 1.2 (Scan# 143)

MassPeaks: 244 (Peak Elimination m/z: 423.20, 425.30)

RawMode: Single 1.2 (143) BasePeak: 91 (2025185)

BG Mode: None Group 1 - Event 1

| # | m/z   | Abs. In | Rel. Int. | # | m/z   | Abs. In | Rel. Int. | # | m/z   | Abs. In | Rel. Int. |
|---|-------|---------|-----------|---|-------|---------|-----------|---|-------|---------|-----------|
| 1 | 50.05 | 5073    | 0.25      | 4 | 52.95 | 3146    | 0.16      | 7 | 57.00 | 1097    | 0.05      |
| 2 | 51.00 | 11465   | 0.57      | 5 | 54.00 | 1751    | 0.09      | 8 | 58.05 | 483     | 0.02      |
| 3 | 52.00 | 13521   | 0.67      | 6 | 55.00 | 583     | 0.03      | 9 | 59.00 | 2993    | 0.15      |

Mass chart of compound 5

| #  | m/z    | Abs. In | Rel. Int. | #   | m/z    | Abs. In | Rel. Int. | #   | m/z    | Abs. In | Rel. Int. |
|----|--------|---------|-----------|-----|--------|---------|-----------|-----|--------|---------|-----------|
| 10 | 60.05  | 391     | 0.02      | 79  | 129.05 | 9313    | 0.46      | 148 | 201.95 | 1028    | 0.05      |
| 11 | 61.05  | 3772    | 0.19      | 80  | 130.05 | 11086   | 0.55      | 149 | 204.25 | 5464    | 0.27      |
| 12 | 62.05  | 17107   | 0.84      | 81  | 131.10 | 5054    | 0.25      | 150 | 205.15 | 701     | 0.03      |
| 13 | 63.00  | 56926   | 2.81      | 82  | 132.05 | 10987   | 0.54      | 151 | 206.20 | 1020    | 0.05      |
| 14 | 64.05  | 36812   | 1.82      | 83  | 133.10 | 3684    | 0.18      | 152 | 207.25 | 2877    | 0.14      |
| 15 | 65.00  | 176463  | 8.71      | 84  | 134.15 | 9264    | 0.46      | 153 | 208.20 | 14284   | 0.71      |
| 16 | 65.95  | 12878   | 0.64      | 85  | 135.05 | 30121   | 1.49      | 154 | 209.15 | 17645   | 0.87      |
| 17 | 67.00  | 1580    | 0.08      | 86  | 136.05 | 4109    | 0.20      | 155 | 210.05 | 5896    | 0.29      |
| 18 | 68.05  | 483     | 0.02      | 87  | 137.05 | 5343    | 0.26      | 156 | 211.15 | 1898    | 0.09      |
| 19 | 69.10  | 985     | 0.05      | 88  | 138.05 | 7879    | 0.39      | 157 | 212.05 | 5471    | 0.27      |
| 20 | 70.10  | 1497    | 0.07      | 89  | 139.00 | 35607   | 1.76      | 158 | 213.10 | 2154    | 0.11      |
| 21 | 71.10  | 1663    | 0.08      | 90  | 140.05 | 41787   | 2.06      | 159 | 214.05 | 4336    | 0.21      |
| 22 | 72.05  | 379     | 0.02      | 91  | 141.00 | 77244   | 3.81      | 160 | 215.15 | 994     | 0.05      |
| 23 | 73.05  | 2080    | 0.10      | 92  | 142.05 | 47101   | 2.33      | 161 | 216.10 | 6855    | 0.34      |
| 24 | 74.05  | 4921    | 0.24      | 93  | 142.95 | 126529  | 6.25      | 162 | 217.05 | 395     | 0.02      |
| 25 | 75.05  | 5212    | 0.26      | 94  | 143.95 | 48735   | 2.41      | 163 | 218.10 | 921     | 0.05      |
| 26 | 76.05  | 6114    | 0.30      | 95  | 144.95 | 28945   | 1.43      | 164 | 221.20 | 846     | 0.04      |
| 27 | 77.05  | 10886   | 0.54      | 96  | 146.05 | 23129   | 1.14      | 165 | 223.15 | 1595    | 0.08      |
| 28 | 78.05  | 20811   | 1.03      | 97  | 146.95 | 4067    | 0.20      | 166 | 224.10 | 14468   | 0.71      |
| 29 | 79.05  | 8101    | 0.40      | 98  | 148.15 | 1843    | 0.09      | 167 | 225.15 | 19403   | 0.96      |
| 30 | 80.00  | 5090    | 0.25      | 99  | 149.15 | 8597    | 0.42      | 168 | 226.10 | 153471  | 7.58      |
| 31 | 81.05  | 1605    | 0.08      | 100 | 150.15 | 20578   | 1.02      | 169 | 227.15 | 166163  | 8.20      |
| 32 | 82.15  | 1045    | 0.05      | 101 | 151.05 | 33271   | 1.64      | 170 | 228.10 | 368934  | 18.22     |
| 33 | 83.10  | 2590    | 0.13      | 102 | 152.05 | 32505   | 1.61      | 171 | 229.15 | 120571  | 5.95      |
| 34 | 84.15  | 2599    | 0.13      | 103 | 153.05 | 20872   | 1.03      | 172 | 230.10 | 706377  | 34.88     |
| 35 | 85.15  | 4470    | 0.22      | 104 | 154.05 | 7855    | 0.39      | 173 | 231.05 | 94541   | 4.67      |
| 36 | 86.05  | 4174    | 0.21      | 105 | 155.00 | 4855    | 0.24      | 174 | 232.10 | 132870  | 6.56      |
| 37 | 87.15  | 6312    | 0.31      | 106 | 155.95 | 3585    | 0.18      | 175 | 233.05 | 15116   | 0.75      |
| 38 | 88.15  | 20787   | 1.03      | 107 | 157.00 | 3398    | 0.17      | 176 | 234.05 | 960     | 0.05      |
| 39 | 89.15  | 110480  | 5.46      | 108 | 157.95 | 2693    | 0.13      | 177 | 238.15 | 969     | 0.05      |
| 40 | 90.15  | 391518  | 19.33     | 109 | 159.05 | 2274    | 0.11      | 178 | 239.25 | 4131    | 0.20      |
| 41 | 91.05  | 202518  | 100.00    | 110 | 160.05 | 4165    | 0.21      | 179 | 240.25 | 35113   | 1.73      |
| 42 | 92.05  | 228419  | 11.28     | 111 | 161.00 | 602     | 0.03      | 180 | 241.25 | 155831  | 7.69      |
| 43 | 93.05  | 46032   | 2.27      | 112 | 162.05 | 482     | 0.02      | 181 | 242.10 | 54386   | 2.69      |
| 44 | 94.00  | 4180    | 0.21      | 113 | 163.05 | 3714    | 0.18      | 182 | 243.15 | 12588   | 0.62      |
| 45 | 95.00  | 8522    | 0.42      | 114 | 164.05 | 12889   | 0.64      | 183 | 244.10 | 56178   | 2.77      |
| 46 | 96.15  | 1388    | 0.07      | 115 | 165.05 | 22436   | 1.11      | 184 | 245.05 | 8044    | 0.40      |
| 47 | 97.10  | 2596    | 0.13      | 116 | 166.05 | 47284   | 2.33      | 185 | 246.10 | 9770    | 0.48      |
| 48 | 98.10  | 2490    | 0.12      | 117 | 167.05 | 66556   | 3.29      | 186 | 247.10 | 1503    | 0.07      |
| 49 | 99.10  | 2721    | 0.13      | 118 | 168.00 | 102111  | 5.04      | 187 | 254.35 | 1823    | 0.09      |
| 50 | 100.15 | 911     | 0.04      | 119 | 169.05 | 77098   | 3.81      | 188 | 255.25 | 10721   | 0.53      |
| 51 | 101.10 | 2750    | 0.14      | 120 | 169.95 | 174770  | 8.63      | 189 | 256.15 | 3888    | 0.19      |
| 52 | 102.10 | 4402    | 0.22      | 121 | 170.95 | 74461   | 3.68      | 190 | 257.15 | 1891    | 0.09      |
| 53 | 103.10 | 7242    | 0.36      | 122 | 172.00 | 39018   | 1.93      | 191 | 258.15 | 4289    | 0.21      |
| 54 | 104.05 | 11796   | 0.58      | 123 | 172.95 | 11808   | 0.58      | 192 | 259.15 | 3074    | 0.15      |
| 55 | 105.05 | 7012    | 0.35      | 124 | 173.95 | 1305    | 0.06      | 193 | 260.15 | 2910    | 0.14      |
| 56 | 106.10 | 11636   | 0.57      | 125 | 176.15 | 889     | 0.04      | 194 | 261.15 | 2231    | 0.11      |
| 57 | 107.05 | 13258   | 0.65      | 126 | 177.15 | 2401    | 0.12      | 195 | 262.20 | 1594    | 0.08      |
| 58 | 108.00 | 3873    | 0.19      | 127 | 178.15 | 5969    | 0.29      | 196 | 283.25 | 376     | 0.02      |
| 59 | 109.15 | 1378    | 0.07      | 128 | 179.15 | 10187   | 0.50      | 197 | 284.25 | 1803    | 0.09      |
| 60 | 110.05 | 979     | 0.05      | 129 | 180.15 | 36701   | 1.81      | 198 | 285.20 | 7185    | 0.35      |
| 61 | 111.05 | 2440    | 0.12      | 130 | 181.10 | 18865   | 0.93      | 199 | 286.20 | 14742   | 0.73      |
| 62 | 112.05 | 2793    | 0.14      | 131 | 182.15 | 14965   | 0.74      | 200 | 287.15 | 23239   | 1.15      |
| 63 | 113.05 | 9979    | 0.49      | 132 | 183.05 | 3441    | 0.17      | 201 | 288.20 | 24534   | 1.21      |
| 64 | 114.05 | 12822   | 0.63      | 133 | 184.00 | 2350    | 0.12      | 202 | 289.15 | 36611   | 1.81      |
| 65 | 115.00 | 27724   | 1.37      | 134 | 185.10 | 1281    | 0.06      | 203 | 290.15 | 36028   | 1.78      |
| 66 | 116.05 | 18052   | 0.89      | 135 | 186.05 | 1167    | 0.06      | 204 | 291.10 | 11612   | 0.57      |
| 67 | 117.00 | 53988   | 2.67      | 136 | 190.05 | 602     | 0.03      | 205 | 292.15 | 6462    | 0.32      |
| 68 | 118.05 | 26835   | 1.33      | 137 | 191.05 | 1736    | 0.09      | 206 | 293.15 | 552     | 0.03      |
| 69 | 119.05 | 43451   | 2.15      | 138 | 192.05 | 12467   | 0.62      | 207 | 306.20 | 302     | 0.01      |
| 70 | 120.05 | 15785   | 0.78      | 139 | 193.05 | 17901   | 0.88      | 208 | 308.10 | 636     | 0.03      |
| 71 | 121.10 | 4878    | 0.24      | 140 | 194.05 | 131489  | 6.49      | 209 | 310.05 | 707     | 0.03      |
| 72 | 122.05 | 2063    | 0.10      | 141 | 195.05 | 146464  | 7.23      | 210 | 314.25 | 1728    | 0.09      |
| 73 | 123.10 | 1527    | 0.08      | 142 | 196.00 | 323593  | 15.98     | 211 | 315.20 | 18481   | 0.91      |
| 74 | 124.05 | 682     | 0.03      | 143 | 197.05 | 113333  | 5.60      | 212 | 316.25 | 23945   | 1.18      |
| 75 | 125.05 | 4002    | 0.20      | 144 | 198.00 | 620129  | 30.62     | 213 | 317.20 | 196281  | 9.69      |
| 76 | 126.05 | 5459    | 0.27      | 145 | 198.95 | 99120   | 4.89      | 214 | 318.25 | 227987  | 11.26     |
| 77 | 127.05 | 10480   | 0.52      | 146 | 200.00 | 113441  | 5.60      | 215 | 319.20 | 494574  | 24.42     |
| 78 | 128.05 | 10844   | 0.54      | 147 | 200.95 | 16159   | 0.80      | 216 | 320.25 | 188395  | 9.30      |

| #   | m/z    | Abs. In | Rel. Int. | #   | m/z    | Abs. In | Rel. Int. | #   | m/z    | Abs. In | Rel. Int. |
|-----|--------|---------|-----------|-----|--------|---------|-----------|-----|--------|---------|-----------|
| 217 | 321.20 | 949119  | 46.87     | 227 | 334.25 | 12617   | 0.62      | 237 | 407.30 | 3812    | 0.19      |
| 218 | 322.15 | 206457  | 10.19     | 228 | 335.20 | 61590   | 3.04      | 238 | 408.35 | 4545    | 0.22      |
| 219 | 323.15 | 182324  | 9.00      | 229 | 336.15 | 14251   | 0.70      | 239 | 409.25 | 10425   | 0.51      |
| 220 | 324.05 | 37472   | 1.85      | 230 | 337.20 | 12284   | 0.61      | 240 | 410.35 | 4385    | 0.22      |
| 221 | 325.05 | 4024    | 0.20      | 231 | 338.15 | 2137    | 0.11      | 241 | 411.25 | 19850   | 0.98      |
| 222 | 329.25 | 824     | 0.04      | 232 | 347.20 | 470     | 0.02      | 242 | 412.25 | 5834    | 0.29      |
| 223 | 330.25 | 1720    | 0.08      | 233 | 349.20 | 1524    | 0.08      | 243 | 413.25 | 4131    | 0.20      |
| 224 | 331.20 | 13207   | 0.65      | 234 | 355.20 | 474     | 0.02      | 244 | 414.15 | 786     | 0.04      |
| 225 | 332.25 | 14297   | 0.71      | 235 | 378.20 | 226     | 0.01      |     |        |         |           |
| 226 | 333.20 | 31734   | 1.57      | 236 | 380.20 | 604     | 0.03      |     |        |         |           |

Mass chart of compound 5

*Synthesis of methyl 2-amino-5-((2-oxo-2-(phenylamino) ethyl) selenanyl) benzoate (6)[6]*

Compound **6** was synthesized from dimethyl 5,5'-diselanediybis (2-aminobenzoate) (**3**)(2.0 mmol, 916 mg) and 2-chloro-*N*-phenylacetamide (4.4 mmol, 744 mg). It was isolated as violet solid; yield: 699 mg (96%); m.p. = 126–128°C; *R*<sub>f</sub> = 0.50 (petroleum ether/ ethyl acetate 4:2, v/v). IR (KBr):  $\nu$  3466 (N-H), 3354 (N-H), 3246 (N-H), 2945 (C<sub>aliph</sub>-H), 1678, 1594 (C=O), 1542 (C=C), 1439, 1238 (C<sub>Ar</sub>-N), 1090 (C-O), 752 (C-H bending), 695, 552 (C-Se), 539 (C-H rocking); <sup>1</sup>H NMR (400 MHz, DMSO- *d*<sub>6</sub>)  $\delta$  9.99(s, 1H, NH), 7.96(s, 1H, Ar-H), 7.53 (d, *J* = 8.6 Hz, 2H, ArH), 7.48 (d, *J* = 8.6 Hz, 1H, ArH), 7.30 (dd, *J* = 8.6 Hz, *J* = 2.1 Hz, 2H, Ar-H), 7.04 (t, 1H, *J* = 8.6 Hz, Ar-H), 6.86(s, 2H, NH<sub>2</sub>), 6.75(d, *J* = 8.6 Hz, 1H, Ar-H), 3.74 (s, 3H, OCH<sub>3</sub>), 3.42(s, 2H, SeCH<sub>2</sub>); <sup>13</sup>C NMR (101 MHz, DMSO- *d*<sub>6</sub>)  $\delta$  168.65, 167.65, 151.81, 141.13, 139.49, 138.20, 129.14, 123.74, 119.62, 117.89, 111, 109.71, 51.93, 32.33. MS (EI, 70 eV) *m/z* (%) = 364.20(M, 100.0, base peak), 230(40.48), 91.10(31), 77.05(24.13), 59(14.56).

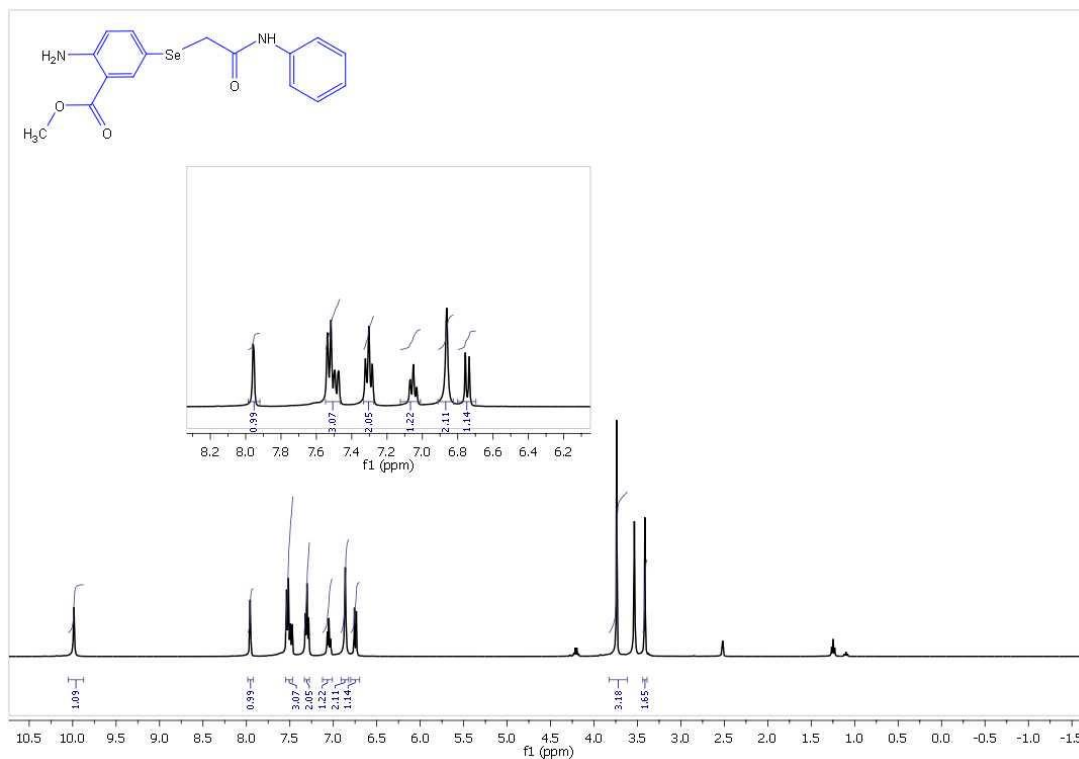

<sup>1</sup>H NMR chart of compound **6**

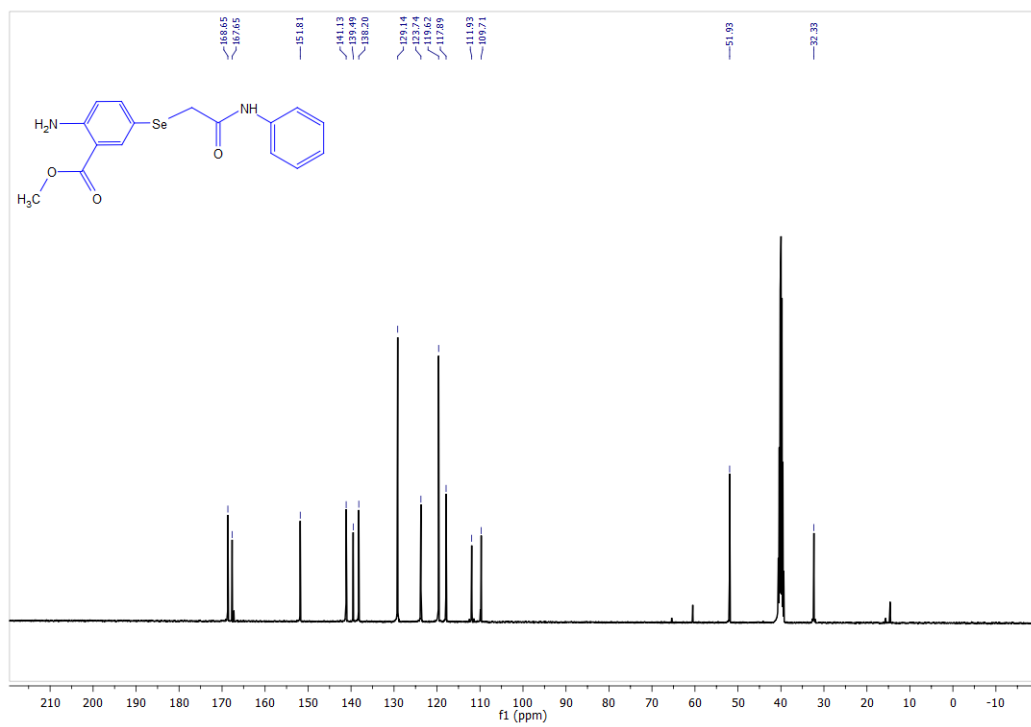

<sup>13</sup>CNMR chart of compound 6

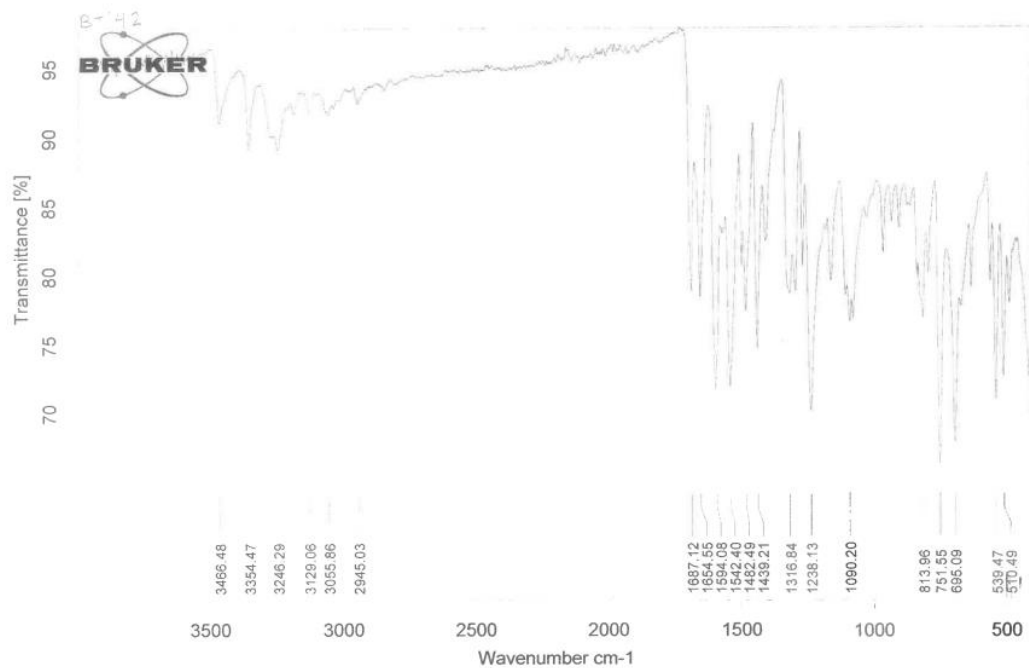

C:\Documents and Settings\adminuser\Desktop\New Folder (2)\test 1.1549

1

Instrument type and / or accessory

11/18/2021

Page 1/1

IR chart of compound **6**

# Cairo University Micro Analytical Center

DI Analysis  
Shimadzu Qp-2010 Plus

Sample Information  
Analyzed by: Dr. Mai Younis  
Analyzed: 06/01/2007 08:03:42  
Sample Name: B23  
Sample ID:  
Customer Name: Dr. Mohamed Soliman - Science - Cairo  
Data File: C:\GCMS\data\Project1\B23.QGD  
Org. Data File: C:\GCMS\data\Project1\B23.QGD  
Method File: C:\GCMS\data\Project1\High Temperature Op  
Org. Method File: C:\GCMS\data\Project1\High Temperature Op  
Report File:  
Tuning File: C:\GCMS\data\System\Tune\Default.tun  
SMD/Modified by: Dr. Mai Younis  
Modified: 06/01/2007 08:06:25

Method  
Analytical Line 1  
IonSourceTemp: 250.00 °C  
[MS Table]  
Group 1 - Event 1  
Start Time: 0.00min  
End Time: 10.00min  
Scan: 5000  
ACQ Mode: Scan  
Event Time: 0.50min  
Scan Speed: 1000  
Start m/z: 50.00  
End m/z: 510.00  
Electron Voltage: 70 eV  
Ionization Mode: EI

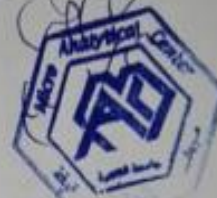

C:\GCMS\data\Project1\B23.QGD

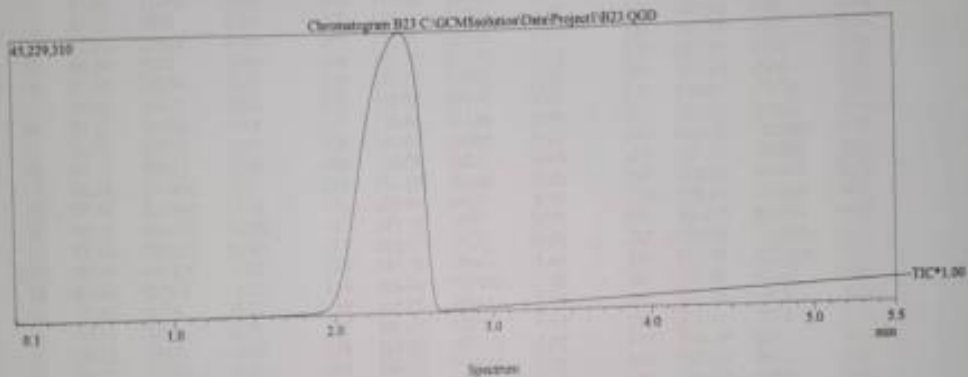

Line# 1 R.Time:2.6(Scan# 309)  
MassPeaks:395(Peak Elimination m/z: 467.40, 468.40, 469.60, 473.60, 487.60)  
RawMode:Single 2.6(309) BasePeak:364(2220999)  
BG Mode:None Group 1 - Event 1

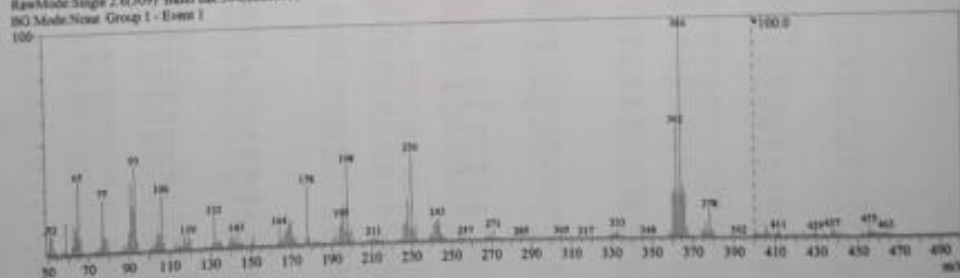

Mass Table

Line# 1 R.Time:2.6(Scan# 309)

MassPeaks:395(Peak Elimination m/z: 467.40, 468.40, 469.60, 473.60, 487.60)

RawMode:Single 2.6(309) BasePeak:364(2220999)

BG Mode:None Group 1 - Event 1

| # | m/z   | Abs. In | Rel. Int. | # | m/z   | Abs. In | Rel. Int. |
|---|-------|---------|-----------|---|-------|---------|-----------|
| 1 | 30.05 | 51768   | 2.33      | 4 | 53.00 | 56865   | 2.56      |
| 2 | 51.00 | 187841  | 8.46      | 5 | 54.00 | 39409   | 1.77      |
| 3 | 52.00 | 198514  | 8.94      | 6 | 55.00 | 21300   | 0.96      |
|   |       |         |           | 7 | 56.05 | 7933    | 0.36      |
|   |       |         |           | 8 | 57.05 | 37932   | 1.71      |
|   |       |         |           | 9 | 58.05 | 57716   | 2.60      |

Mass chart of compound 6

| #  | m/z    | Abs. In | Rel. Int. | #   | m/z    | Abs. In | Rel. Int. | #   | m/z    | Abs. In | Rel. Int. |
|----|--------|---------|-----------|-----|--------|---------|-----------|-----|--------|---------|-----------|
| 10 | 59.00  | 323380  | 14.56     | 79  | 128.15 | 17920   | 0.81      | 148 | 197.05 | 127657  | 5.75      |
| 11 | 60.00  | 19518   | 0.88      | 80  | 129.15 | 16582   | 0.75      | 149 | 198.00 | 802486  | 36.13     |
| 12 | 61.05  | 25294   | 1.14      | 81  | 130.15 | 23991   | 1.08      | 150 | 198.95 | 111117  | 5.00      |
| 13 | 62.05  | 85663   | 3.86      | 82  | 131.15 | 62358   | 2.81      | 151 | 200.00 | 147049  | 6.62      |
| 14 | 63.05  | 284974  | 12.83     | 83  | 132.10 | 333977  | 15.04     | 152 | 201.00 | 27327   | 1.23      |
| 15 | 64.05  | 250676  | 11.29     | 84  | 133.15 | 66067   | 2.97      | 153 | 202.05 | 6591    | 0.30      |
| 16 | 65.00  | 718538  | 32.35     | 85  | 134.15 | 78340   | 3.53      | 154 | 203.15 | 3651    | 0.16      |
| 17 | 66.00  | 152620  | 6.87      | 86  | 135.15 | 69517   | 3.13      | 155 | 204.15 | 2634    | 0.12      |
| 18 | 66.95  | 28433   | 1.28      | 87  | 136.15 | 11769   | 0.53      | 156 | 205.10 | 8610    | 0.39      |
| 19 | 68.05  | 8877    | 0.40      | 88  | 137.10 | 7681    | 0.35      | 157 | 206.05 | 3512    | 0.16      |
| 20 | 69.05  | 15359   | 0.69      | 89  | 138.15 | 13090   | 0.59      | 158 | 207.05 | 11680   | 0.53      |
| 21 | 70.05  | 8547    | 0.38      | 90  | 139.15 | 52222   | 2.36      | 159 | 208.05 | 15928   | 0.72      |
| 22 | 71.05  | 14796   | 0.67      | 91  | 140.10 | 117575  | 5.29      | 160 | 209.05 | 33769   | 1.52      |
| 23 | 72.05  | 7256    | 0.33      | 92  | 141.05 | 90195   | 4.06      | 161 | 210.05 | 30291   | 1.36      |
| 24 | 73.05  | 29968   | 1.35      | 93  | 142.05 | 52676   | 2.37      | 162 | 211.05 | 55042   | 2.48      |
| 25 | 74.05  | 26922   | 1.21      | 94  | 143.00 | 141599  | 6.38      | 163 | 212.05 | 30408   | 1.37      |
| 26 | 75.05  | 38018   | 1.71      | 95  | 144.00 | 54009   | 2.43      | 164 | 213.05 | 31320   | 1.41      |
| 27 | 76.05  | 89648   | 4.04      | 96  | 145.05 | 43425   | 1.96      | 165 | 214.05 | 18869   | 0.85      |
| 28 | 77.05  | 535908  | 24.13     | 97  | 146.05 | 54032   | 2.43      | 166 | 215.05 | 9367    | 0.42      |
| 29 | 78.05  | 171575  | 7.73      | 98  | 147.10 | 12569   | 0.57      | 167 | 216.05 | 19840   | 0.89      |
| 30 | 79.05  | 144276  | 6.50      | 99  | 148.10 | 17756   | 0.80      | 168 | 217.05 | 4333    | 0.20      |
| 31 | 80.05  | 37639   | 1.69      | 100 | 149.15 | 8208    | 0.37      | 169 | 218.05 | 4479    | 0.20      |
| 32 | 81.05  | 11176   | 0.50      | 101 | 150.15 | 38743   | 1.74      | 170 | 219.10 | 2612    | 0.12      |
| 33 | 82.15  | 5419    | 0.24      | 102 | 151.10 | 102964  | 4.64      | 171 | 220.10 | 778     | 0.04      |
| 34 | 83.10  | 15562   | 0.70      | 103 | 152.05 | 16710   | 0.75      | 172 | 221.15 | 1397    | 0.06      |
| 35 | 84.15  | 7935    | 0.36      | 104 | 153.10 | 11177   | 0.50      | 173 | 222.15 | 1142    | 0.05      |
| 36 | 85.10  | 16374   | 0.74      | 105 | 154.10 | 14711   | 0.66      | 174 | 223.15 | 4881    | 0.22      |
| 37 | 86.15  | 16002   | 0.72      | 106 | 155.05 | 15641   | 0.70      | 175 | 224.05 | 17976   | 0.81      |
| 38 | 87.10  | 69636   | 3.14      | 107 | 156.05 | 11100   | 0.50      | 176 | 225.15 | 20916   | 0.94      |
| 39 | 88.15  | 32733   | 1.47      | 108 | 157.05 | 15214   | 0.69      | 177 | 226.10 | 174902  | 7.87      |
| 40 | 89.15  | 88448   | 3.98      | 109 | 158.05 | 8233    | 0.37      | 178 | 227.15 | 189200  | 8.52      |
| 41 | 90.15  | 210874  | 9.49      | 110 | 159.10 | 16986   | 0.76      | 179 | 228.05 | 447454  | 20.15     |
| 42 | 91.10  | 688561  | 31.00     | 111 | 160.05 | 4503    | 0.20      | 180 | 229.15 | 133404  | 6.01      |
| 43 | 92.15  | 463765  | 20.88     | 112 | 161.15 | 4537    | 0.20      | 181 | 230.05 | 899020  | 40.48     |
| 44 | 93.10  | 862055  | 38.81     | 113 | 162.15 | 5173    | 0.23      | 182 | 231.05 | 114924  | 5.17      |
| 45 | 94.05  | 112159  | 5.05      | 114 | 163.15 | 35647   | 1.60      | 183 | 232.05 | 173318  | 7.80      |
| 46 | 95.00  | 27708   | 1.25      | 115 | 164.10 | 195450  | 8.80      | 184 | 233.05 | 21637   | 0.97      |
| 47 | 96.10  | 5274    | 0.24      | 116 | 165.05 | 50811   | 2.29      | 185 | 234.05 | 3484    | 0.16      |
| 48 | 97.10  | 9146    | 0.41      | 117 | 166.05 | 92270   | 4.15      | 186 | 235.15 | 3179    | 0.14      |
| 49 | 98.15  | 5237    | 0.24      | 118 | 167.05 | 149172  | 6.72      | 187 | 236.15 | 3807    | 0.17      |
| 50 | 99.10  | 12962   | 0.58      | 119 | 168.05 | 172761  | 7.78      | 188 | 237.05 | 8985    | 0.40      |
| 51 | 100.15 | 13487   | 0.61      | 120 | 169.05 | 226041  | 10.18     | 189 | 238.15 | 10887   | 0.49      |
| 52 | 101.10 | 60012   | 2.70      | 121 | 170.00 | 257615  | 11.60     | 190 | 239.10 | 48174   | 2.17      |
| 53 | 102.15 | 30642   | 1.38      | 122 | 171.00 | 96798   | 4.36      | 191 | 240.10 | 75681   | 3.41      |
| 54 | 103.15 | 88585   | 3.99      | 123 | 172.00 | 69998   | 3.15      | 192 | 241.10 | 157647  | 7.10      |
| 55 | 104.10 | 204116  | 9.19      | 124 | 173.00 | 21033   | 0.95      | 193 | 242.15 | 186228  | 8.38      |
| 56 | 105.15 | 159966  | 7.20      | 125 | 174.10 | 7897    | 0.36      | 194 | 243.10 | 230793  | 10.39     |
| 57 | 106.10 | 568420  | 25.59     | 126 | 175.15 | 17735   | 0.80      | 195 | 244.05 | 179124  | 8.07      |
| 58 | 107.10 | 76871   | 3.46      | 127 | 176.15 | 7737    | 0.35      | 196 | 245.05 | 65413   | 2.95      |
| 59 | 108.05 | 12580   | 0.57      | 128 | 177.15 | 62536   | 2.82      | 197 | 246.05 | 36727   | 1.65      |
| 60 | 109.10 | 3719    | 0.17      | 129 | 178.10 | 605762  | 27.27     | 198 | 247.20 | 22822   | 1.03      |
| 61 | 110.15 | 3039    | 0.14      | 130 | 179.05 | 72024   | 3.24      | 199 | 248.15 | 7827    | 0.35      |
| 62 | 111.15 | 9856    | 0.44      | 131 | 180.05 | 20815   | 0.94      | 200 | 249.15 | 2124    | 0.10      |
| 63 | 112.15 | 15347   | 0.69      | 132 | 181.10 | 26969   | 1.21      | 201 | 250.25 | 1835    | 0.08      |
| 64 | 113.10 | 93678   | 4.22      | 133 | 182.05 | 36544   | 1.65      | 202 | 251.20 | 7351    | 0.33      |
| 65 | 114.15 | 34219   | 1.54      | 134 | 183.10 | 28086   | 1.26      | 203 | 252.15 | 3123    | 0.14      |
| 66 | 115.10 | 49390   | 2.22      | 135 | 184.05 | 26423   | 1.19      | 204 | 253.15 | 6626    | 0.30      |
| 67 | 116.15 | 38664   | 1.74      | 136 | 185.00 | 19938   | 0.90      | 205 | 254.15 | 7024    | 0.32      |
| 68 | 117.10 | 130407  | 5.87      | 137 | 186.00 | 10751   | 0.48      | 206 | 255.10 | 19212   | 0.87      |
| 69 | 118.15 | 63644   | 2.87      | 138 | 187.05 | 6516    | 0.29      | 207 | 256.15 | 19273   | 0.87      |
| 70 | 119.10 | 142945  | 6.44      | 139 | 188.25 | 4750    | 0.21      | 208 | 257.10 | 29007   | 1.31      |
| 71 | 120.10 | 98100   | 4.42      | 140 | 189.15 | 25047   | 1.13      | 209 | 258.15 | 10175   | 0.46      |
| 72 | 121.05 | 14291   | 0.64      | 141 | 190.15 | 9994    | 0.45      | 210 | 259.20 | 21718   | 0.98      |
| 73 | 122.10 | 5969    | 0.27      | 142 | 191.15 | 57570   | 2.59      | 211 | 260.15 | 6061    | 0.27      |
| 74 | 123.05 | 3081    | 0.14      | 143 | 192.10 | 82754   | 3.73      | 212 | 261.15 | 4356    | 0.20      |
| 75 | 124.15 | 1538    | 0.07      | 144 | 193.05 | 33585   | 1.51      | 213 | 262.15 | 3391    | 0.15      |
| 76 | 125.15 | 3955    | 0.18      | 145 | 194.05 | 172249  | 7.76      | 214 | 263.15 | 3353    | 0.15      |
| 77 | 126.15 | 7068    | 0.32      | 146 | 195.05 | 249002  | 11.21     | 215 | 264.10 | 1687    | 0.08      |
| 78 | 127.15 | 19469   | 0.88      | 147 | 196.00 | 413670  | 18.63     | 216 | 265.15 | 3515    | 0.16      |

Mass chart of compound 6

| #   | m/z    | Abs. In | Rel. Int. | #   | m/z    | Abs. In | Rel. Int. | #   | m/z    | Abs. In | Rel. Int. |
|-----|--------|---------|-----------|-----|--------|---------|-----------|-----|--------|---------|-----------|
| 217 | 266.15 | 2637    | 0.12      | 277 | 326.15 | 836     | 0.04      | 337 | 387.30 | 279     | 0.01      |
| 218 | 267.10 | 18146   | 0.82      | 278 | 327.15 | 2834    | 0.13      | 338 | 388.25 | 396     | 0.02      |
| 219 | 268.15 | 20158   | 0.91      | 279 | 328.15 | 6050    | 0.27      | 339 | 389.35 | 651     | 0.03      |
| 220 | 269.10 | 46786   | 2.11      | 280 | 329.15 | 23275   | 1.05      | 340 | 390.25 | 1290    | 0.06      |
| 221 | 270.15 | 15694   | 0.71      | 281 | 330.15 | 29151   | 1.31      | 341 | 391.35 | 1022    | 0.05      |
| 222 | 271.10 | 96137   | 4.33      | 282 | 331.15 | 50733   | 2.28      | 342 | 392.30 | 1966    | 0.09      |
| 223 | 272.05 | 16070   | 0.72      | 283 | 332.15 | 33893   | 1.53      | 343 | 393.35 | 1297    | 0.06      |
| 224 | 273.10 | 21305   | 0.96      | 284 | 333.15 | 88344   | 3.98      | 344 | 394.30 | 940     | 0.04      |
| 225 | 274.05 | 3890    | 0.18      | 285 | 334.05 | 24078   | 1.08      | 345 | 395.30 | 473     | 0.02      |
| 226 | 275.15 | 1899    | 0.09      | 286 | 335.15 | 19856   | 0.89      | 346 | 396.45 | 384     | 0.02      |
| 227 | 276.25 | 1345    | 0.06      | 287 | 336.15 | 4538    | 0.20      | 347 | 397.50 | 1070    | 0.05      |
| 228 | 277.20 | 2796    | 0.13      | 288 | 337.15 | 1006    | 0.05      | 348 | 398.45 | 585     | 0.03      |
| 229 | 278.15 | 1435    | 0.06      | 289 | 338.25 | 662     | 0.03      | 349 | 399.45 | 317     | 0.01      |
| 230 | 279.15 | 898     | 0.04      | 290 | 339.30 | 1508    | 0.07      | 350 | 400.20 | 370     | 0.02      |
| 231 | 280.15 | 727     | 0.03      | 291 | 340.25 | 578     | 0.03      | 351 | 401.20 | 289     | 0.01      |
| 232 | 281.15 | 2478    | 0.11      | 292 | 341.25 | 684     | 0.03      | 352 | 402.20 | 250     | 0.01      |
| 233 | 282.15 | 2409    | 0.11      | 293 | 342.25 | 584     | 0.03      | 353 | 403.20 | 257     | 0.01      |
| 234 | 283.10 | 5790    | 0.26      | 294 | 343.25 | 805     | 0.04      | 354 | 404.45 | 336     | 0.02      |
| 235 | 284.15 | 3531    | 0.16      | 295 | 344.20 | 1958    | 0.09      | 355 | 405.40 | 1146    | 0.05      |
| 236 | 285.10 | 12303   | 0.55      | 296 | 345.25 | 2706    | 0.12      | 356 | 406.35 | 447     | 0.02      |
| 237 | 286.15 | 5148    | 0.23      | 297 | 346.20 | 3890    | 0.18      | 357 | 407.40 | 271     | 0.01      |
| 238 | 287.10 | 5833    | 0.26      | 298 | 347.25 | 4640    | 0.21      | 358 | 409.45 | 410     | 0.02      |
| 239 | 288.25 | 2633    | 0.12      | 299 | 348.20 | 7434    | 0.33      | 359 | 410.50 | 282     | 0.01      |
| 240 | 289.15 | 7201    | 0.32      | 300 | 349.15 | 2578    | 0.12      | 360 | 411.50 | 583     | 0.03      |
| 241 | 290.15 | 2596    | 0.12      | 301 | 350.15 | 2611    | 0.12      | 361 | 412.50 | 284     | 0.01      |
| 242 | 291.20 | 2186    | 0.10      | 302 | 351.20 | 977     | 0.04      | 362 | 415.50 | 254     | 0.01      |
| 243 | 292.15 | 1131    | 0.05      | 303 | 352.15 | 764     | 0.03      | 363 | 417.50 | 207     | 0.01      |
| 244 | 293.25 | 1594    | 0.07      | 304 | 353.25 | 847     | 0.04      | 364 | 418.50 | 257     | 0.01      |
| 245 | 294.25 | 1118    | 0.05      | 305 | 354.15 | 553     | 0.02      | 365 | 419.50 | 354     | 0.02      |
| 246 | 295.20 | 5345    | 0.24      | 306 | 355.25 | 657     | 0.03      | 366 | 421.50 | 326     | 0.01      |
| 247 | 296.15 | 1761    | 0.08      | 307 | 356.25 | 704     | 0.03      | 367 | 423.50 | 396     | 0.02      |
| 248 | 297.25 | 811     | 0.04      | 308 | 357.25 | 3443    | 0.16      | 368 | 425.50 | 250     | 0.01      |
| 249 | 298.35 | 617     | 0.03      | 309 | 358.20 | 42783   | 1.93      | 369 | 426.50 | 212     | 0.01      |
| 250 | 299.30 | 823     | 0.04      | 310 | 359.25 | 41697   | 1.88      | 370 | 428.35 | 430     | 0.02      |
| 251 | 300.25 | 1273    | 0.06      | 311 | 360.20 | 448631  | 20.20     | 371 | 429.30 | 458     | 0.02      |
| 252 | 301.25 | 1429    | 0.06      | 312 | 361.25 | 490508  | 22.09     | 372 | 430.30 | 231     | 0.01      |
| 253 | 302.25 | 2061    | 0.09      | 313 | 362.20 | 113024  | 50.89     | 373 | 432.30 | 222     | 0.01      |
| 254 | 303.30 | 3346    | 0.15      | 314 | 363.25 | 433043  | 19.50     | 374 | 433.30 | 212     | 0.01      |
| 255 | 304.35 | 3895    | 0.18      | 315 | 364.20 | 222099  | 100.00    | 375 | 434.30 | 201     | 0.01      |
| 256 | 305.30 | 14001   | 0.63      | 316 | 365.15 | 516139  | 23.24     | 376 | 436.40 | 250     | 0.01      |
| 257 | 306.20 | 5601    | 0.25      | 317 | 366.15 | 453240  | 20.41     | 377 | 437.45 | 688     | 0.03      |
| 258 | 307.15 | 2298    | 0.10      | 318 | 367.15 | 94607   | 4.26      | 378 | 438.35 | 497     | 0.02      |
| 259 | 308.15 | 902     | 0.04      | 319 | 368.15 | 13453   | 0.61      | 379 | 439.50 | 431     | 0.02      |
| 260 | 309.30 | 892     | 0.04      | 320 | 369.15 | 2332    | 0.10      | 380 | 441.50 | 303     | 0.01      |
| 261 | 310.25 | 583     | 0.03      | 321 | 370.30 | 4468    | 0.20      | 381 | 442.50 | 233     | 0.01      |
| 262 | 311.35 | 721     | 0.03      | 322 | 371.25 | 1831    | 0.08      | 382 | 444.50 | 210     | 0.01      |
| 263 | 312.35 | 712     | 0.03      | 323 | 372.20 | 5146    | 0.23      | 383 | 451.50 | 289     | 0.01      |
| 264 | 313.35 | 1160    | 0.05      | 324 | 373.25 | 5093    | 0.23      | 384 | 452.50 | 233     | 0.01      |
| 265 | 314.35 | 803     | 0.04      | 325 | 374.25 | 54806   | 2.47      | 385 | 454.45 | 304     | 0.01      |
| 266 | 315.35 | 918     | 0.04      | 326 | 375.25 | 61887   | 2.79      | 386 | 455.40 | 1105    | 0.05      |
| 267 | 316.35 | 904     | 0.04      | 327 | 376.20 | 144442  | 6.50      | 387 | 456.35 | 499     | 0.02      |
| 268 | 317.30 | 4386    | 0.20      | 328 | 377.25 | 48025   | 2.16      | 388 | 457.10 | 265     | 0.01      |
| 269 | 318.25 | 2391    | 0.11      | 329 | 378.20 | 271025  | 12.20     | 389 | 458.15 | 443     | 0.02      |
| 270 | 319.25 | 2801    | 0.13      | 330 | 379.15 | 67760   | 3.05      | 390 | 459.10 | 218     | 0.01      |
| 271 | 320.25 | 1770    | 0.08      | 331 | 380.20 | 56982   | 2.57      | 391 | 460.20 | 433     | 0.02      |
| 272 | 321.20 | 4260    | 0.19      | 332 | 381.15 | 13270   | 0.60      | 392 | 462.20 | 287     | 0.01      |
| 273 | 322.25 | 2058    | 0.09      | 333 | 382.15 | 2182    | 0.10      | 393 | 463.40 | 473     | 0.02      |
| 274 | 323.25 | 2501    | 0.11      | 334 | 383.20 | 484     | 0.02      | 394 | 464.40 | 252     | 0.01      |
| 275 | 324.25 | 848     | 0.04      | 335 | 384.20 | 236     | 0.01      | 395 | 466.40 | 212     | 0.01      |
| 276 | 325.15 | 508     | 0.02      | 336 | 386.20 | 215     | 0.01      |     |        |         |           |

4-((2-(methoxycarbonyl)-4-(methylselanyl)phenyl)amino)-4-oxobut-2-enoic acid (**7**)

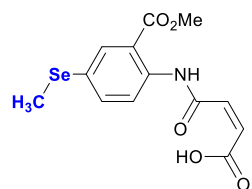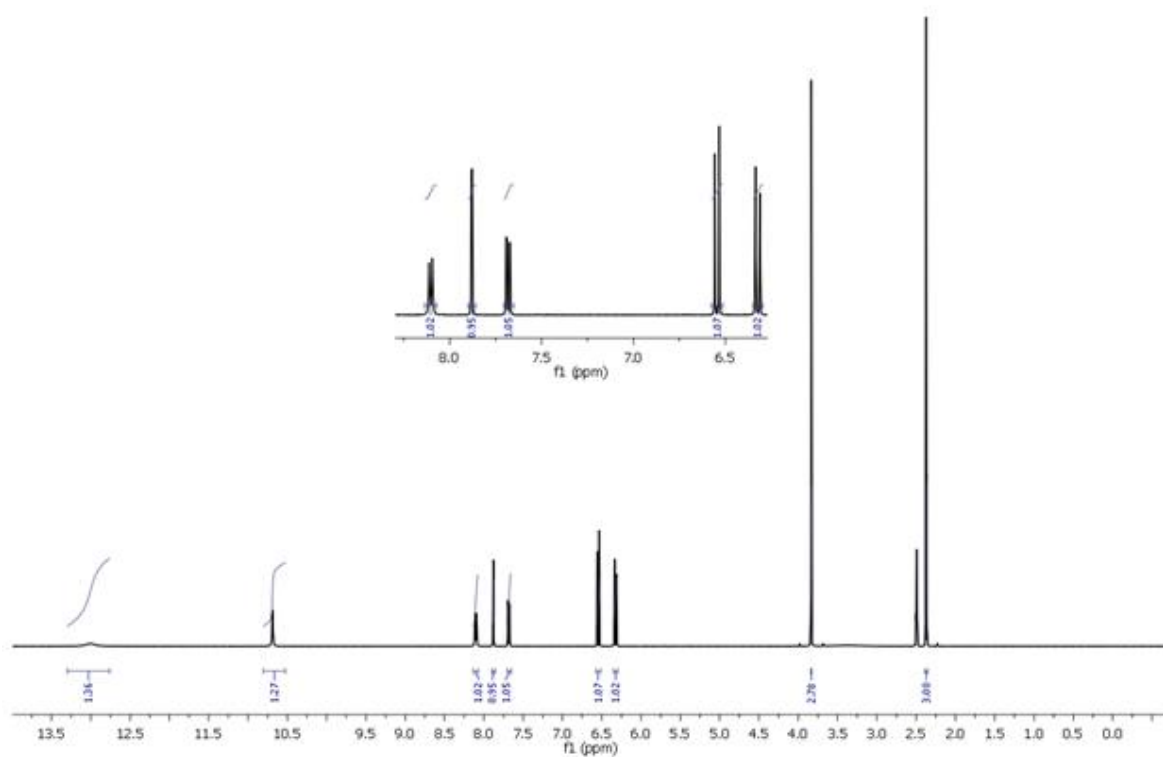

<sup>1</sup>H NMR chart of compound **7**

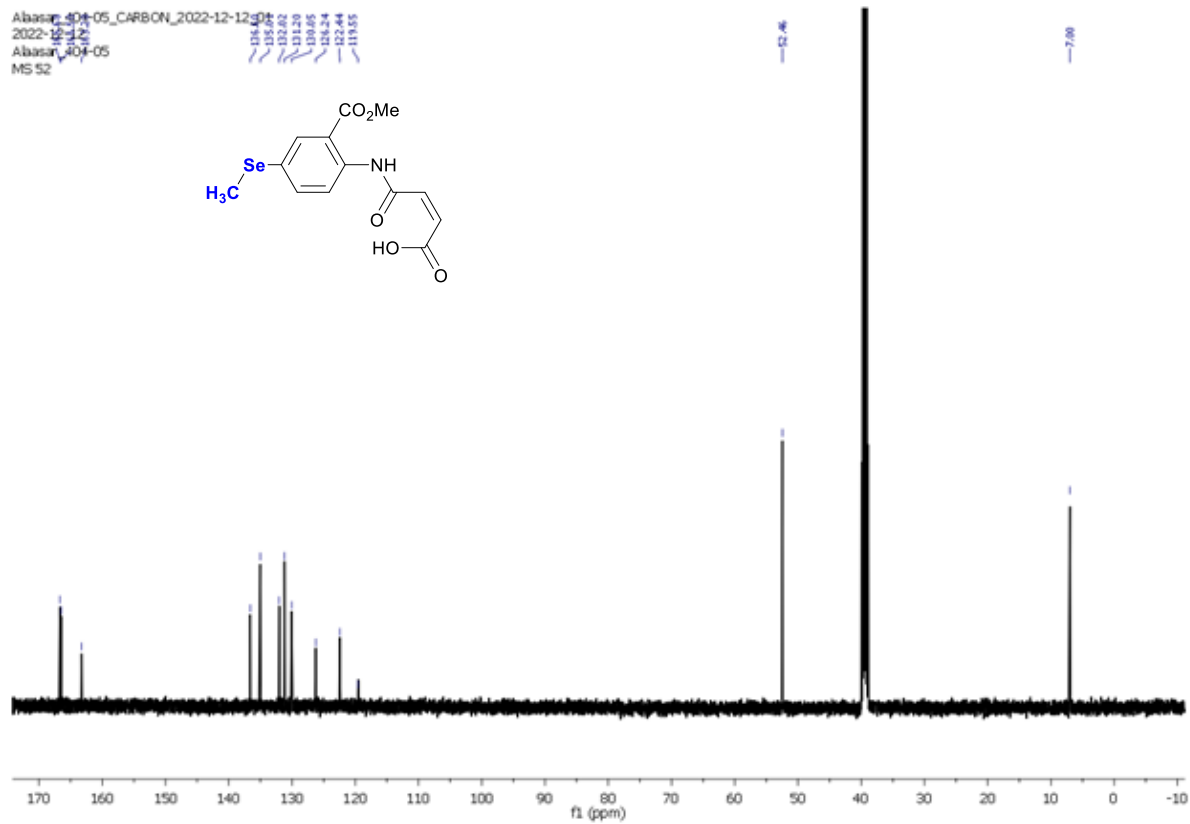

$^{13}\text{C}$ NMR chart of compound 7

# Agilent Resolutions Pro

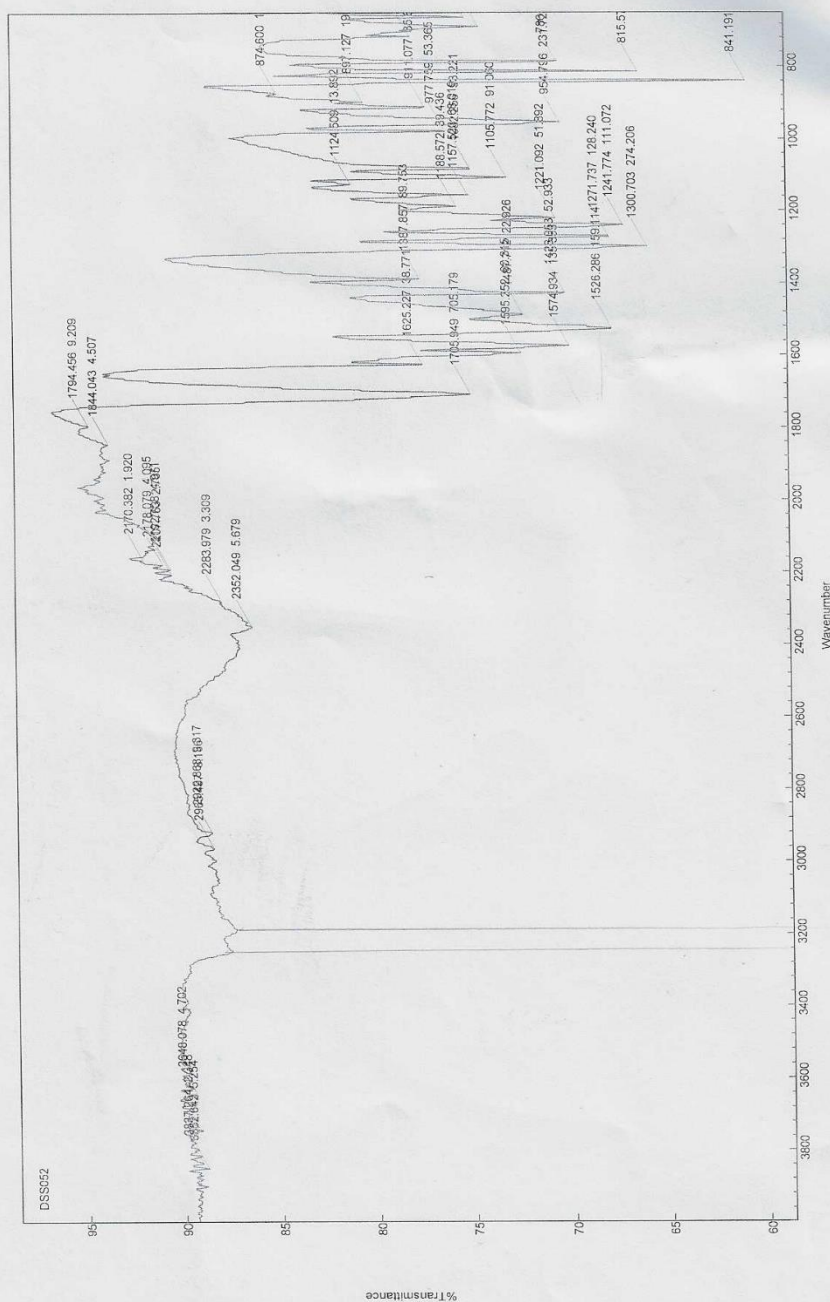

|        |  |
|--------|--|
| Name   |  |
| DSS052 |  |

IR chart of compound 7

Spectrum RT 0:59 - 1:38 (11 scans) - Background Subtracted 0 - 1:03  
 Alaasar\_DS052-1\_Scan1\_is1.datx 2023.03.01 14:04:01 ;  
 ESI + Max: 2.7E6

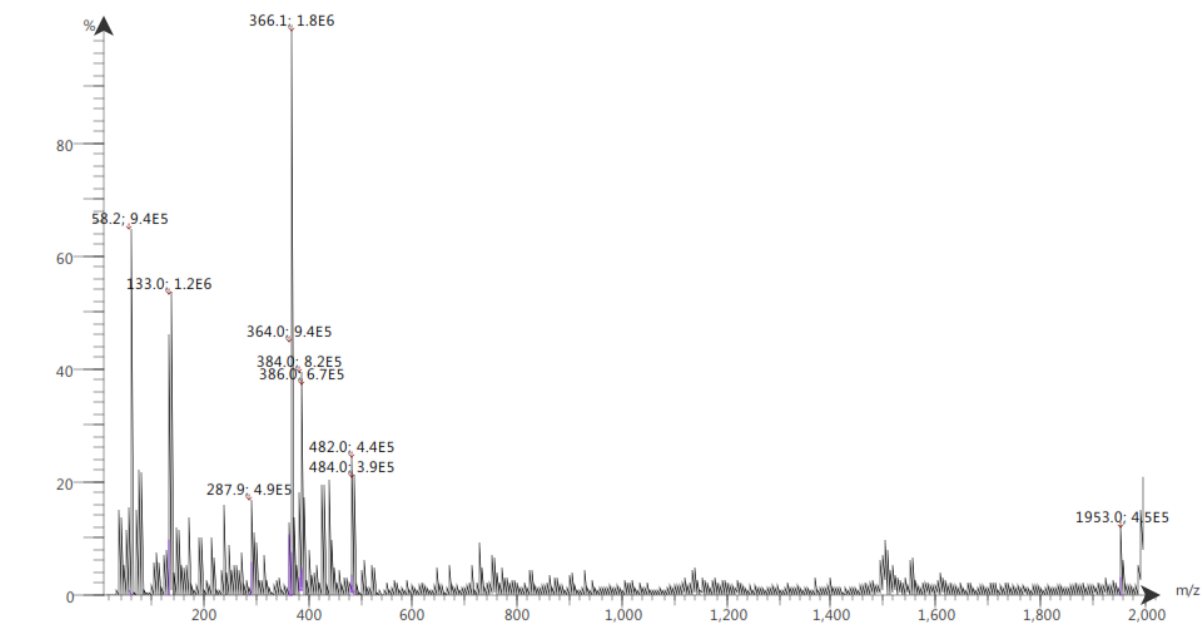

MS chart of compound 7

Spectrum RT 0:54 - 1:23 (65 scans) - Background Subtracted 0 - 0:50  
 Alaasar\_DS052-2\_Scan1\_is1.datx 2023.03.01 14:09:33 ;  
 ESI + Max: 2.7E6

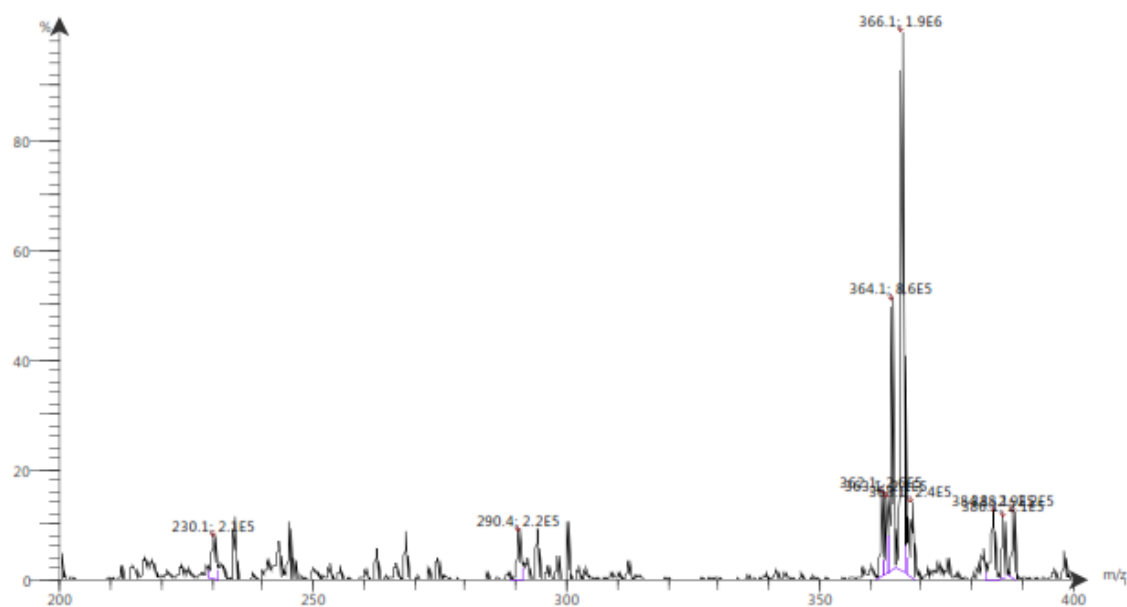

MS chart of compound 7

*4-((2-(methoxycarbonyl)-4-(methylselanyl)phenyl)amino)-4-oxobut-2-enoic acid (8)*

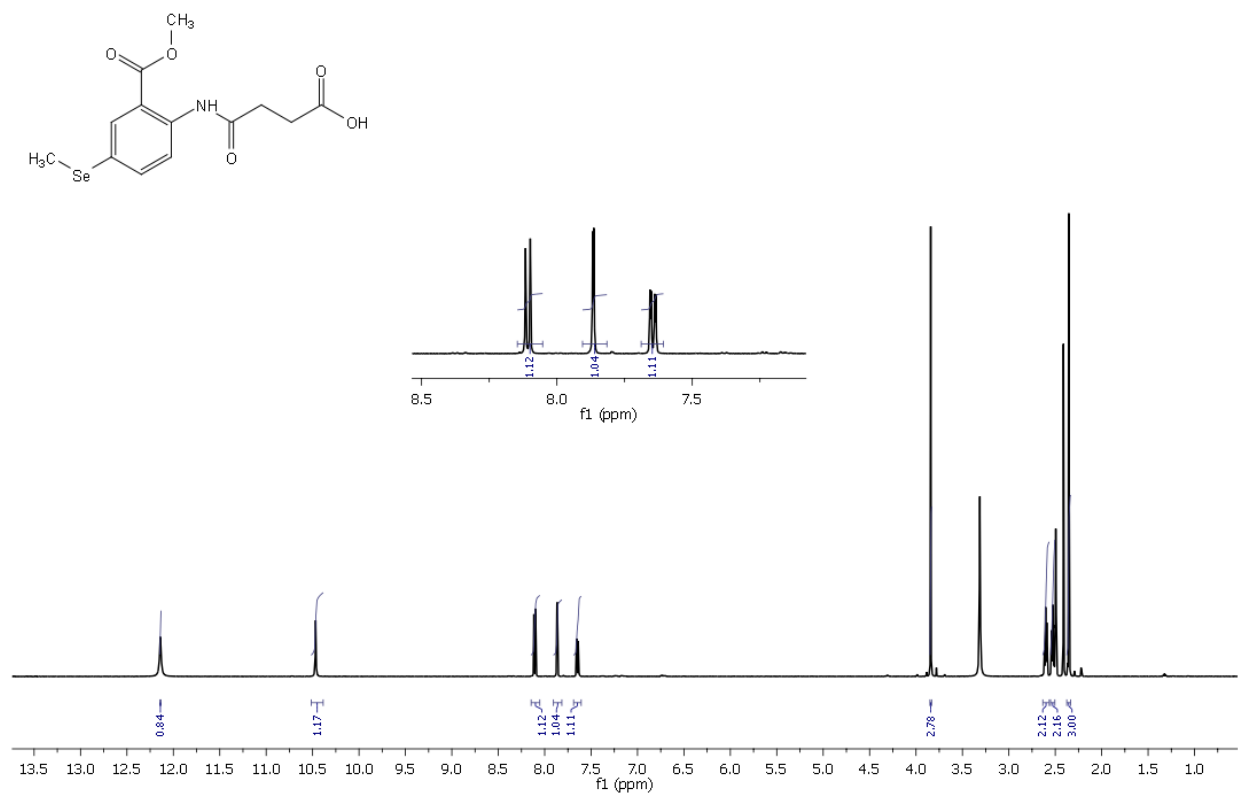

<sup>1</sup>H NMR chart of compound **8**

CC(=O)Oc1ccc(cc1)NS(=O)(=O)CC(=O)O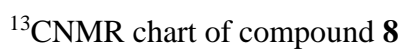

# Agilent Resolutions Pro

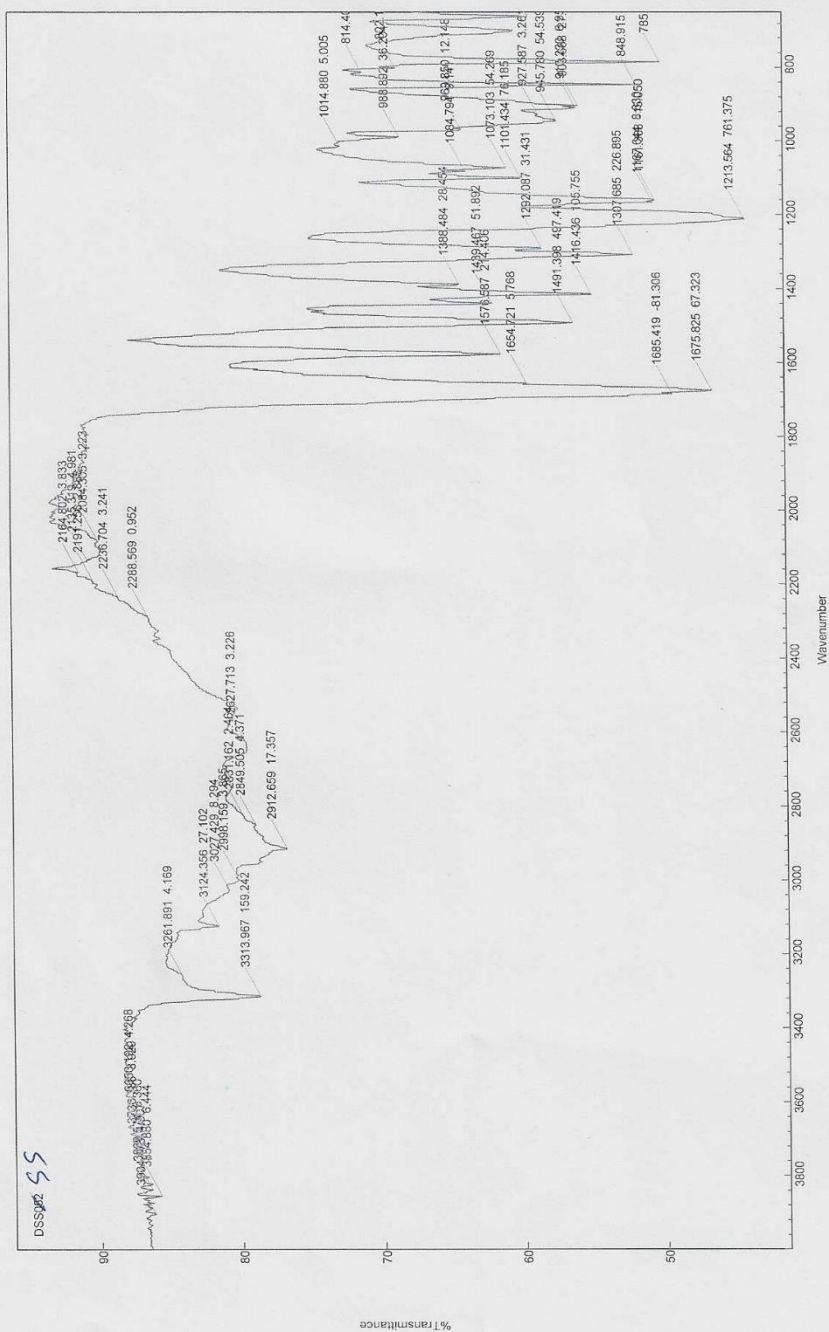

|        |  |
|--------|--|
| Name   |  |
| DSS052 |  |

IR chart of compound 8

Spectrum RT 0:55 - 1:34 (11 scans) - Background Subtracted 0 - 0:51  
 Alaasar\_DS055-1\_Scan1\_is1.datx 2023.03.01 14:15:52 ;  
 ESI + Max: 7.1E6

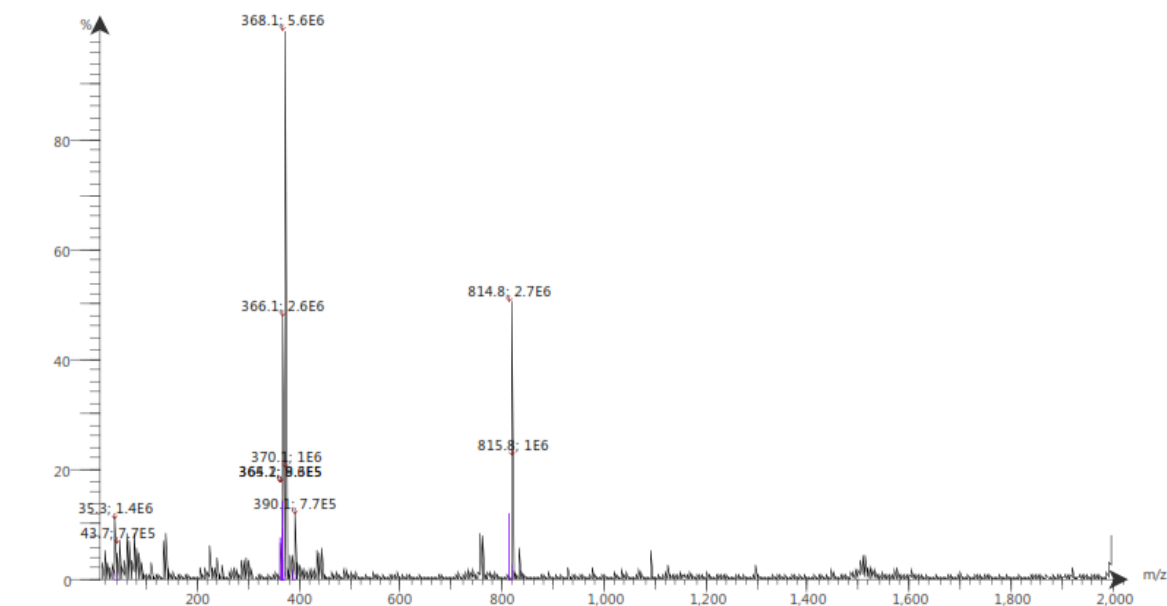

MS chart of compound 8

Spectrum RT 1:11 - 1:52 (91 scans) - Background Subtracted 0 - 1:07  
 Alaasar\_DS055-2\_Scan1\_is1.datx 2023.03.01 14:20:53 ;  
 ESI + Max: 1E7

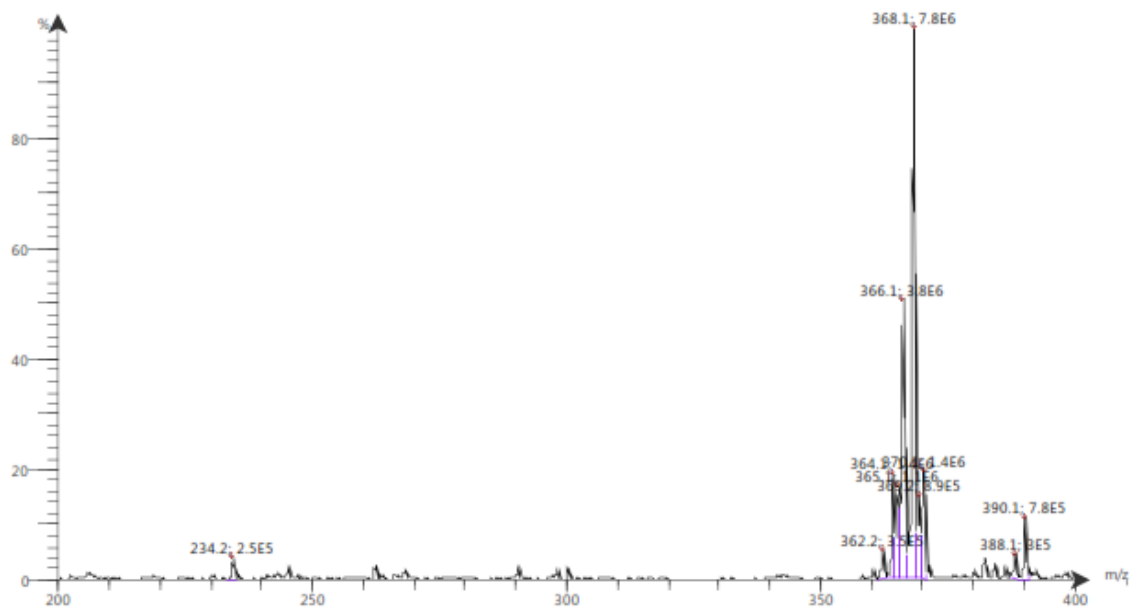

MS chart of compound 8

4-((2-(methoxycarbonyl)-4-(methylselanyl)phenyl)amino)-4-oxobut-2-enoic acid (**9**)

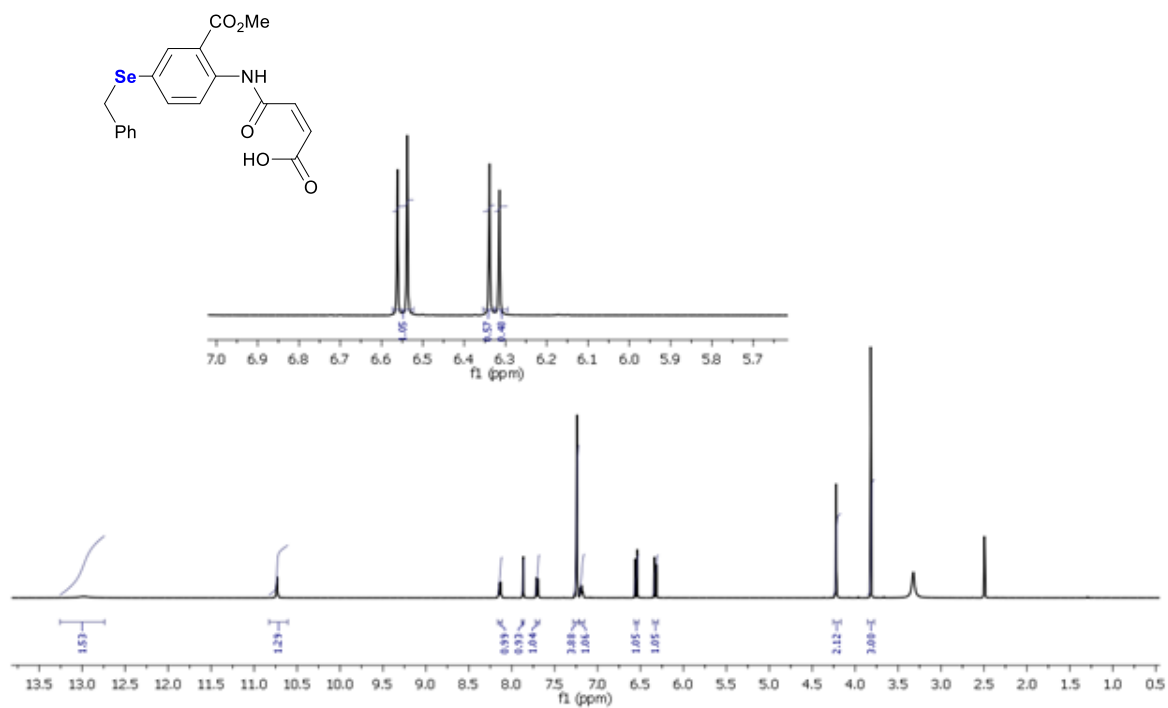

<sup>1</sup>H NMR chart of compound **9**

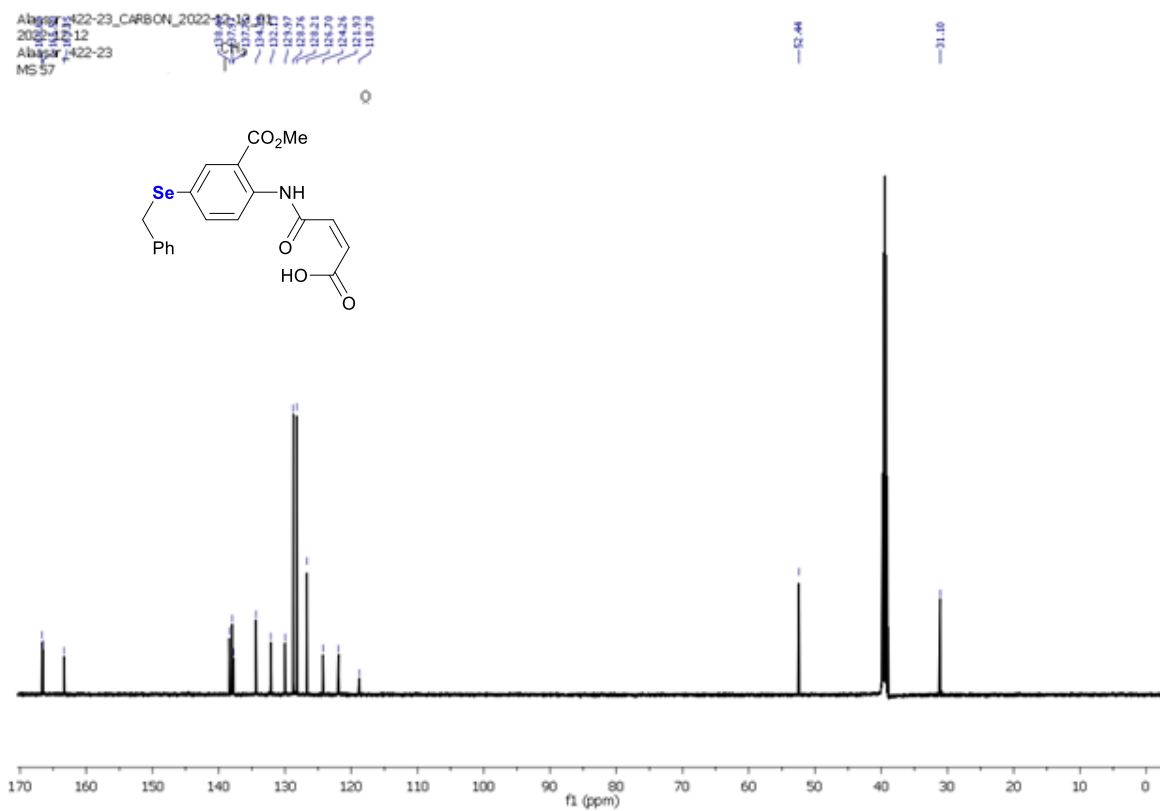

<sup>13</sup>CNMR chart of compound 9

**DSS057**

Wavenumber (cm⁻¹): 3800, 3600, 3400, 3200, 3000, 2800, 2600, 2400, 2200, 2000, 1800, 1600, 1400, 1200, 1000, 800

% Transmittance: 50, 60, 70, 80, 90

Key peaks (Wavenumber, % Transmittance):

- 3253.031, 54.982
- 3191.265, 16.921
- 2867.624, 6.676
- 2253.894, 6.776
- 1792.363, 4.198
- 1611.092, 3.621
- 1594.881, 108.42
- 1571.264, 221.624
- 1527.093, 376.302
- 1460.462, 132.425
- 1407.462, 132.425
- 1386.237, 113.95
- 1322.568, 138.878
- 1222.568, 138.878
- 1125.102, 20.165
- 1093.812, 19.256
- 1039.812, 19.256
- 954.149, 246.03
- 825.38
- 841.277

|        |  |
|--------|--|
| Name   |  |
| DSS057 |  |

**S55**

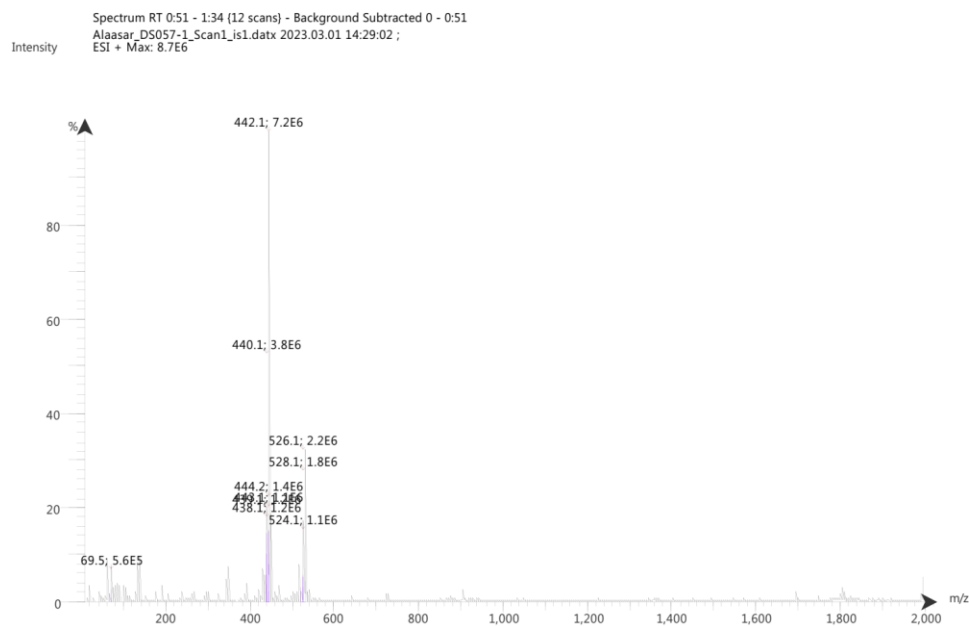

MS chart of compound 9

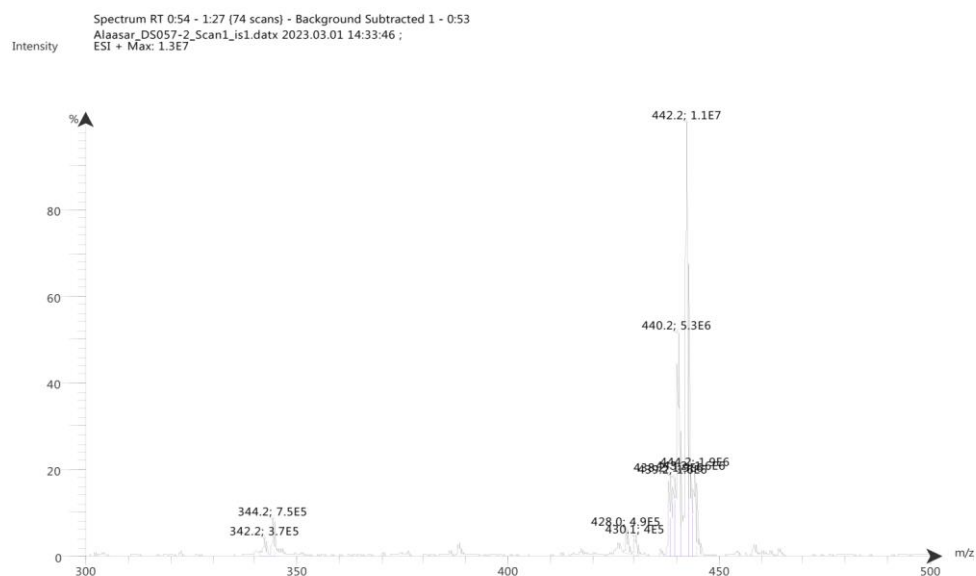

MS chart of compound 9

*4-((2-(methoxycarbonyl)-4-(methylselanyl)phenyl)amino)-4-oxobut-2-enoic acid (10)*

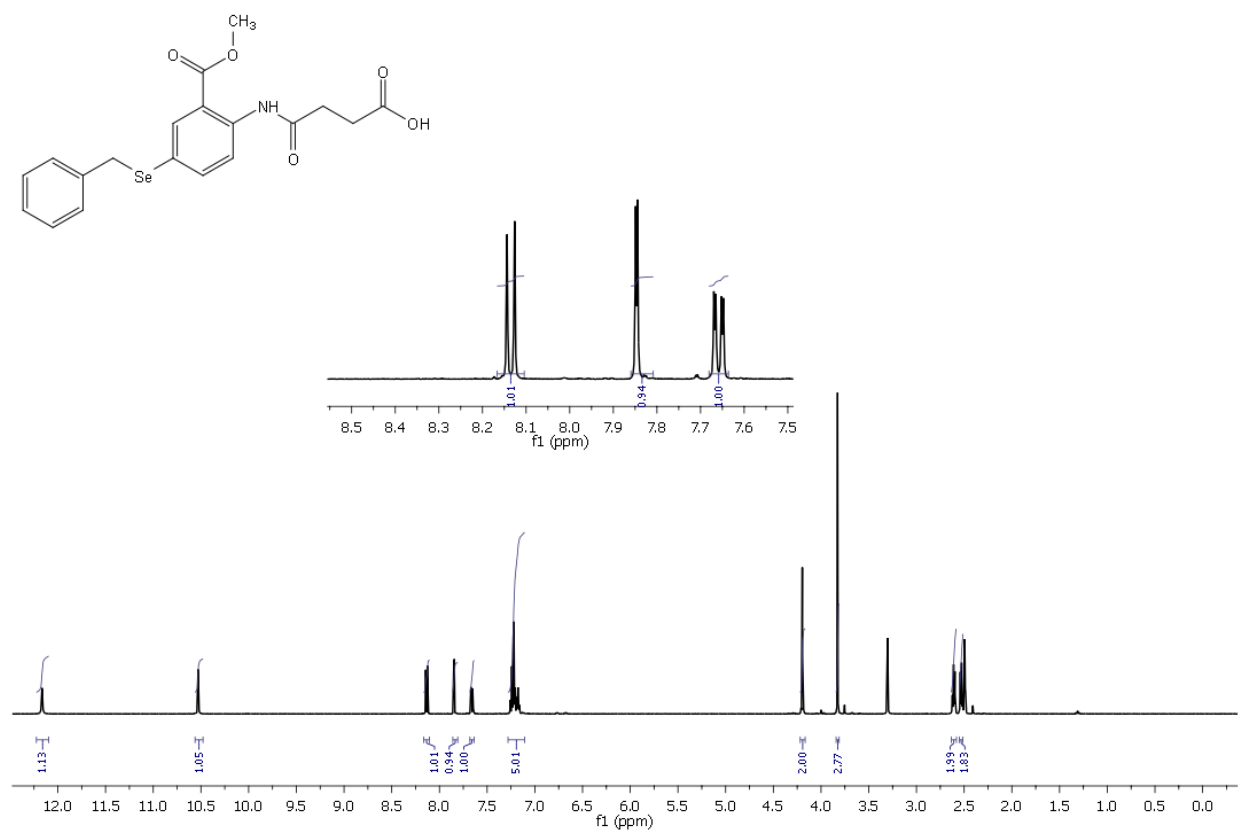

<sup>1</sup>H NMR chart of compound **10**

Alaasar\_420-21-5-ARBON\_2022-12-13\_01  
 2022-12-12  
 Alaasar\_420-21-5-ARBON\_2022-12-13\_01  
 MS 58

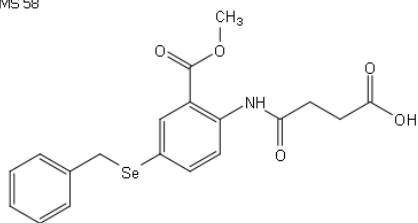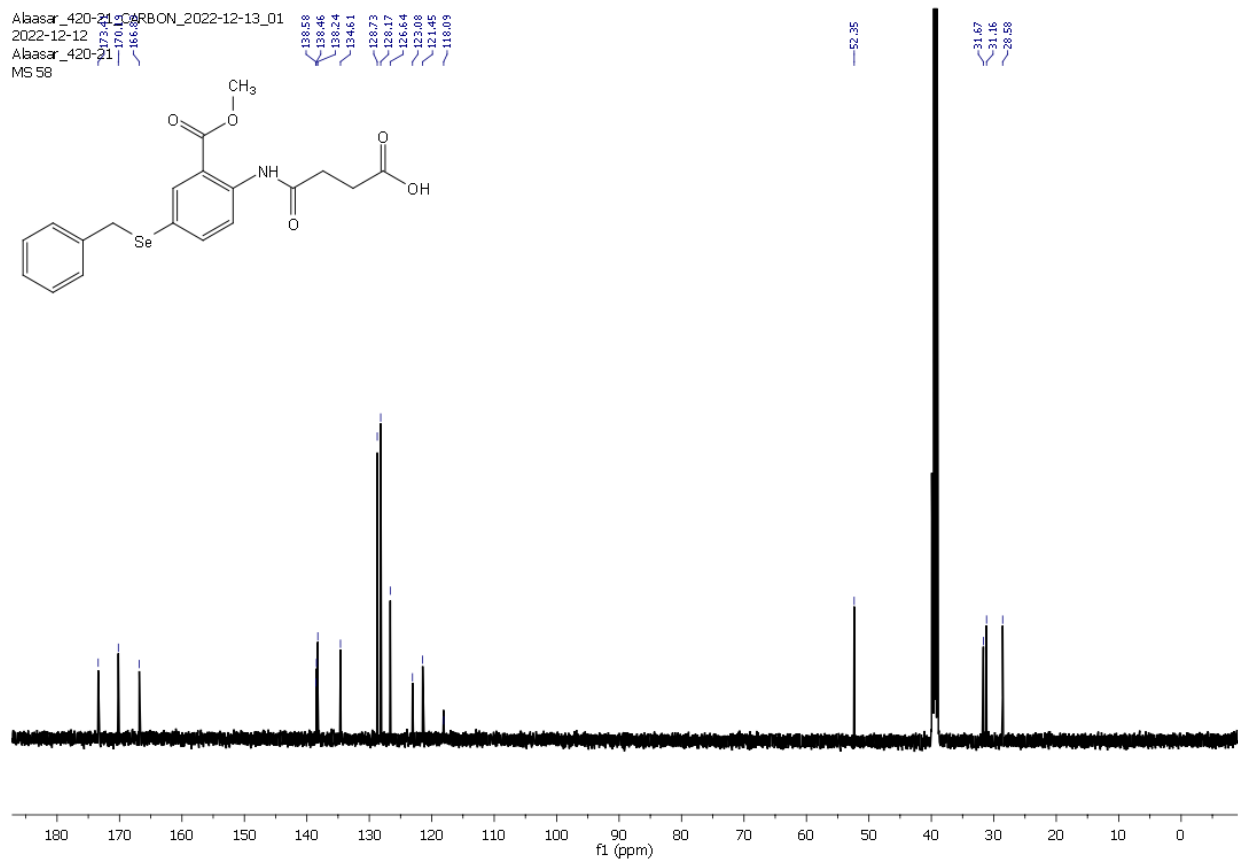

<sup>13</sup>CNMR chart of compound **10**

# Agilent Resolutions Pro

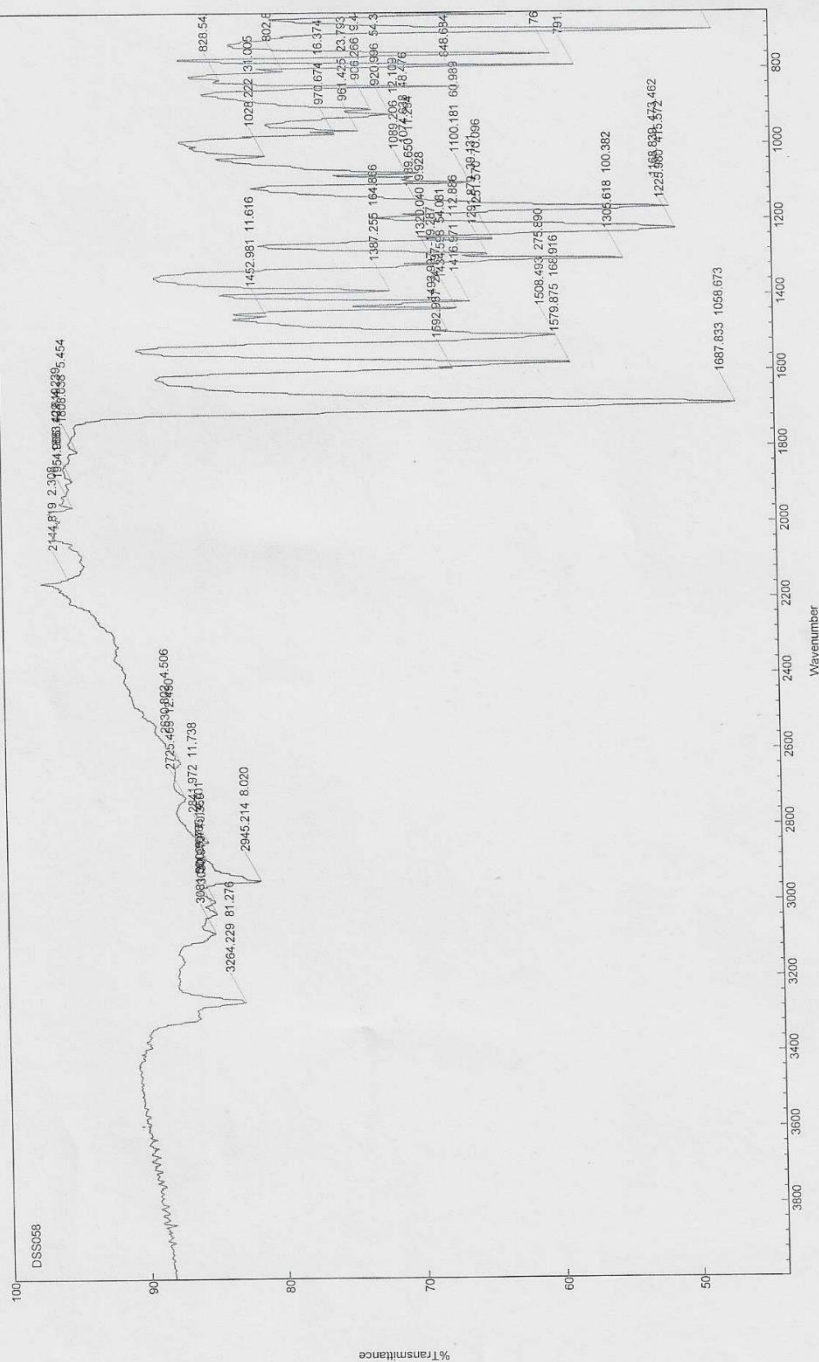

|        |  |
|--------|--|
| Name   |  |
| DSS058 |  |

IR chart of compound 10

Spectrum RT 0:56 - 1:26 (68 scans) - Background Subtracted 0 - 0:52  
 Alaasar\_DS058-2\_Scan2\_is2.datx 2023.03.01 14:48:35 ;  
 ESI - Max: 2.5E7

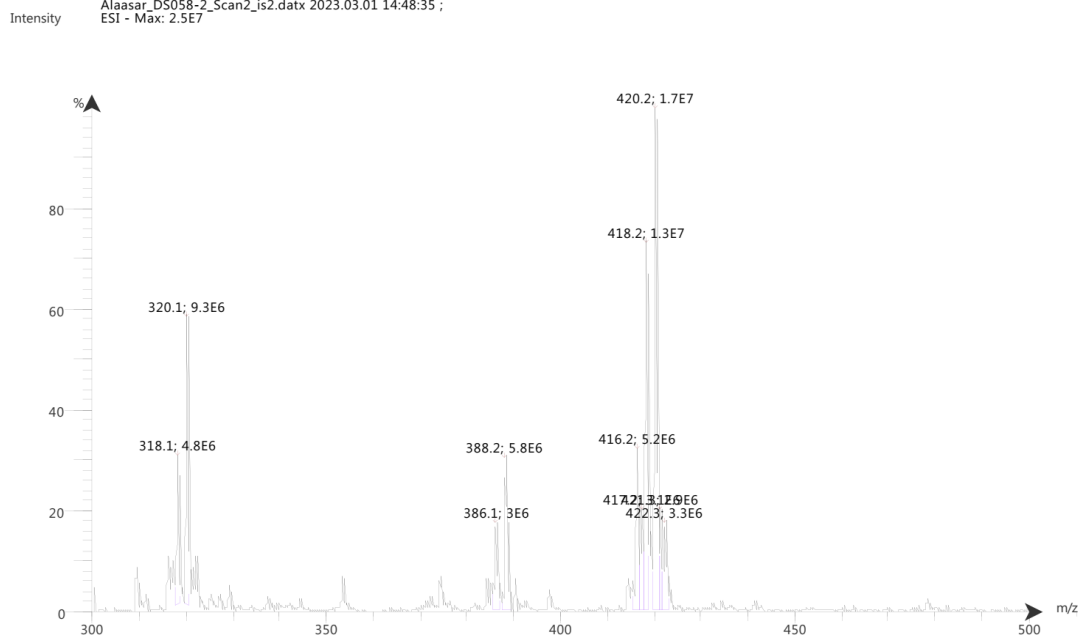

MS chart of compound 10

Spectrum RT 0:55 - 1:29 (75 scans) - Background Subtracted 0 - 0:54  
 Alaasar\_DS058-2\_Scan1\_is1.datx 2023.03.01 14:48:34 ;  
 ESI + Max: 1E7

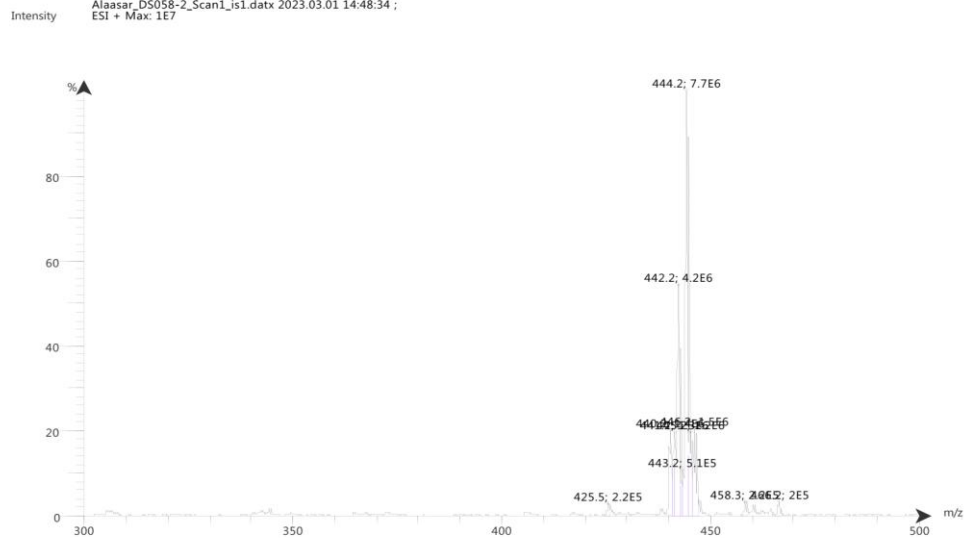

MS chart of compound 10

Spectrum RT 0:59 - 1:53 (15 scans) - Background Subtracted 0 - 0:59  
Alaasar\_DS058-1\_Scan1\_is1.datx 2023.03.01 14:40:39 ;  
ESI + Max: 6.7E6

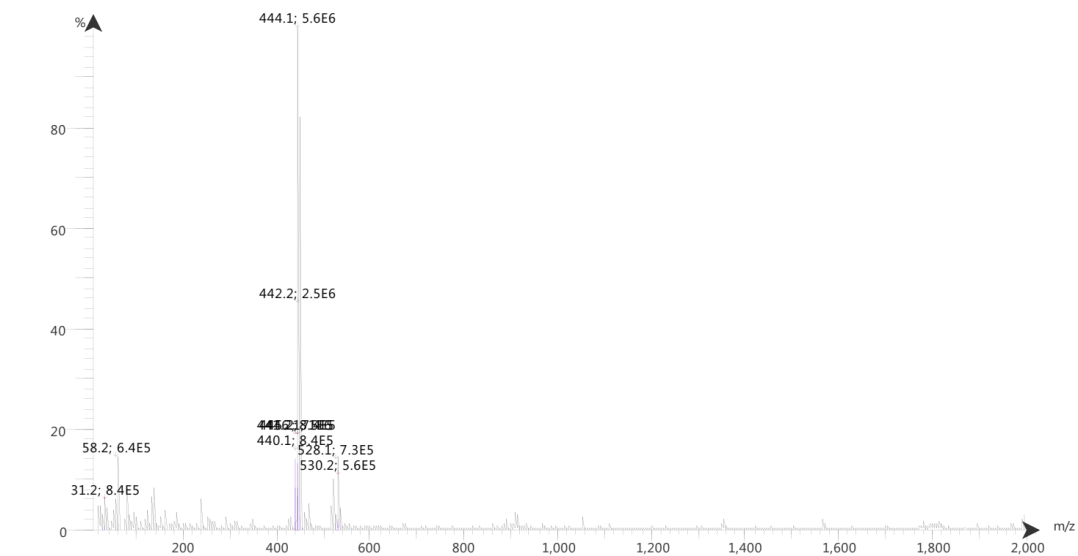

MS chart of compound **10**

4-((2-(methoxycarbonyl)-4-(methylselanyl)phenyl)amino)-4-oxobut-2-enoic acid (**11**)

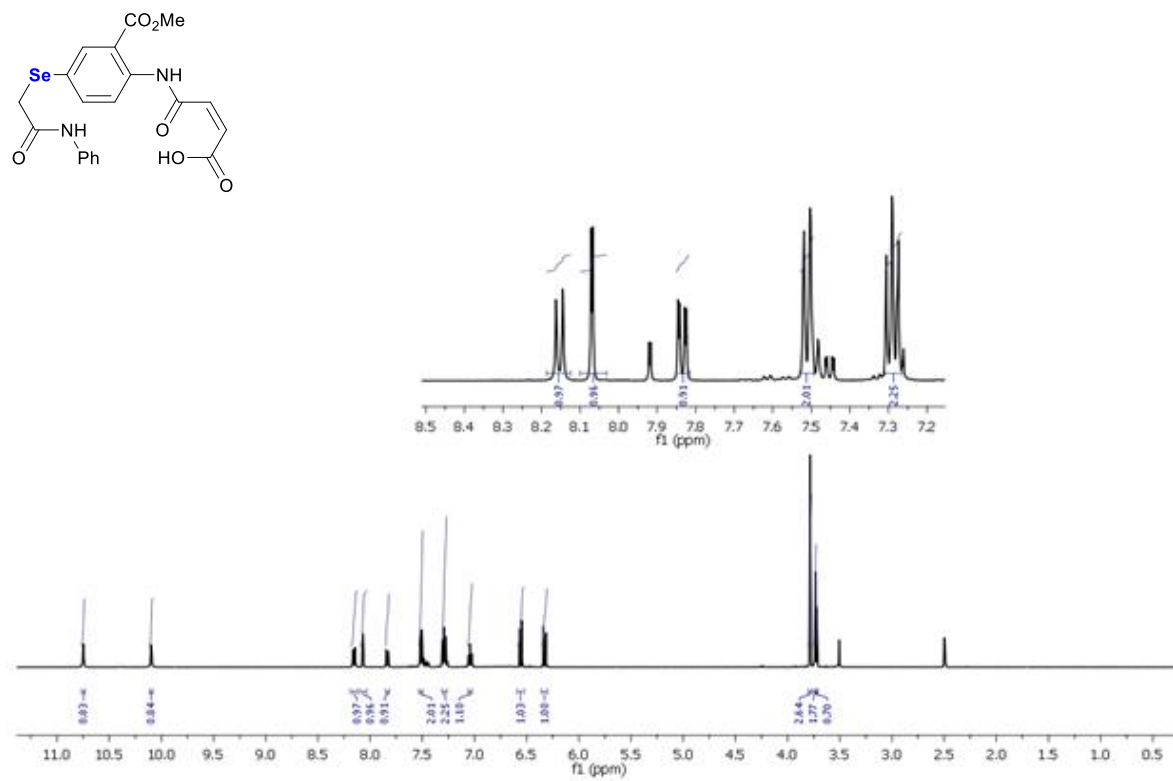

<sup>1</sup>H NMR chart of compound **11**

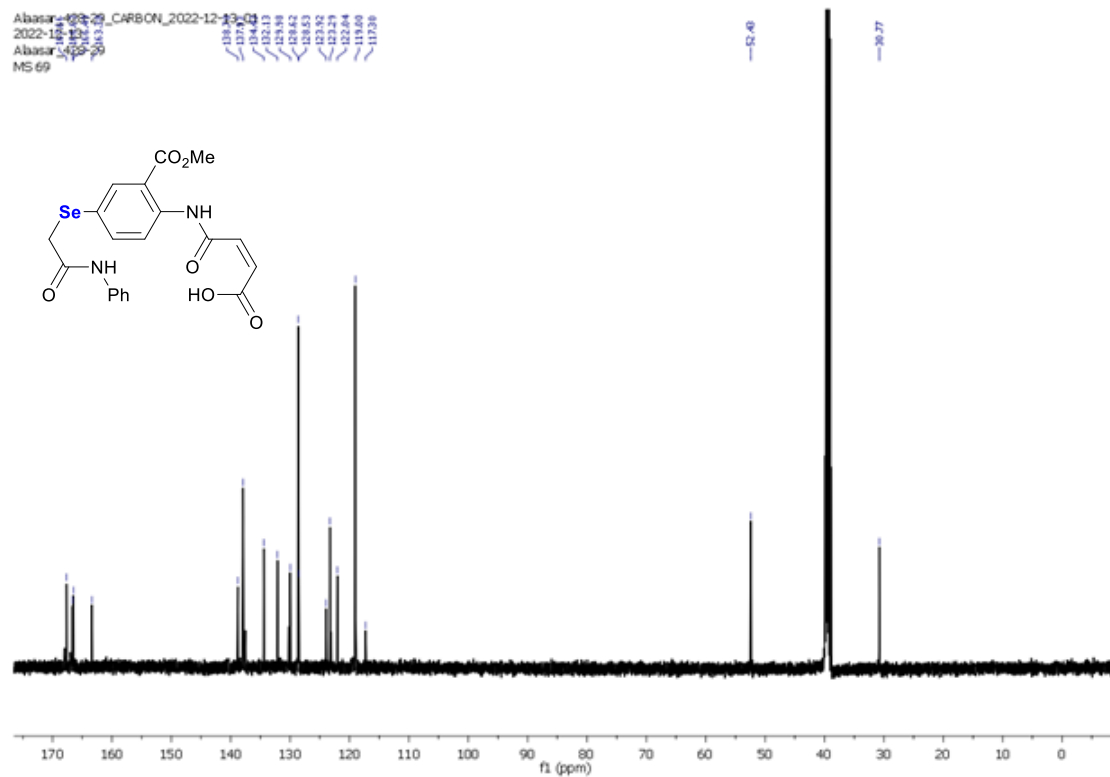

<sup>13</sup>CNMR chart of compound **11**

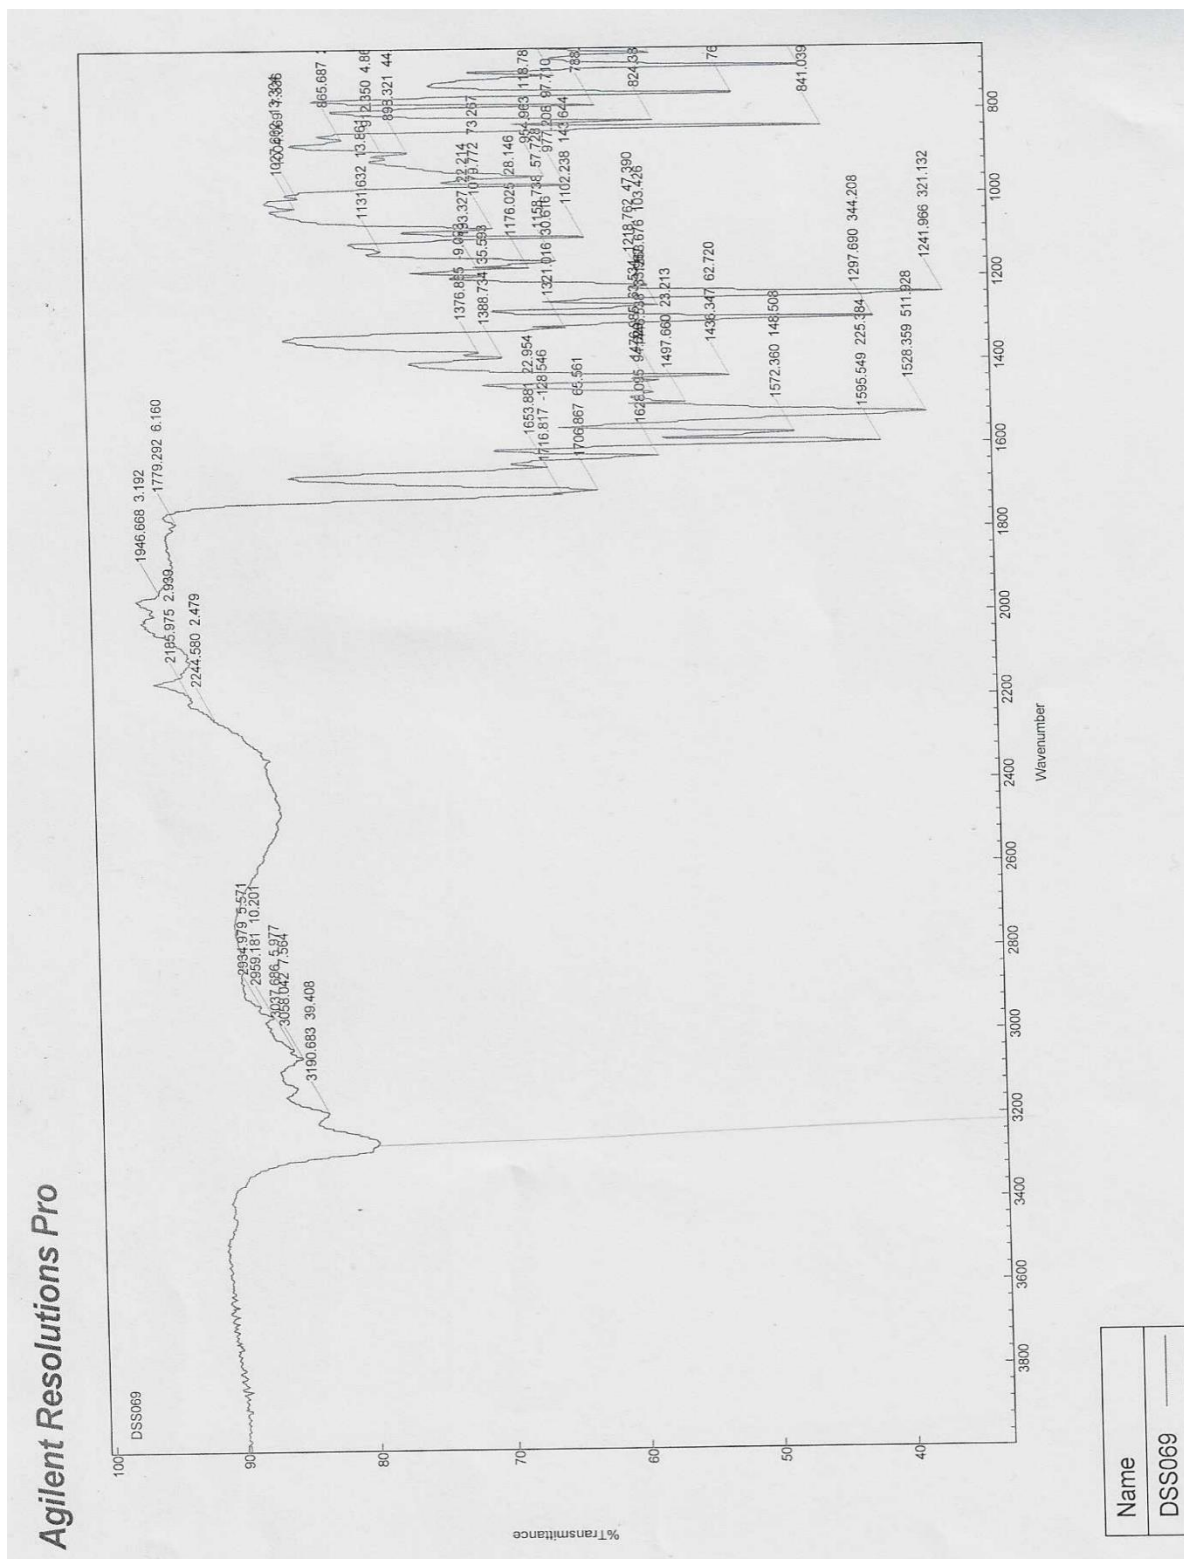

IR chart of compound 11

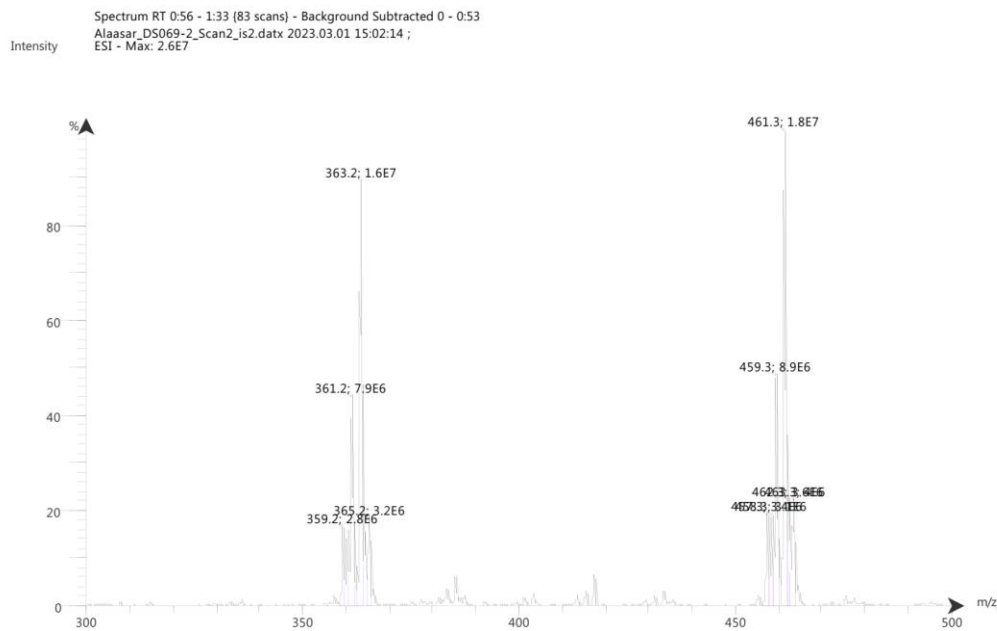

MS chart of compound 11

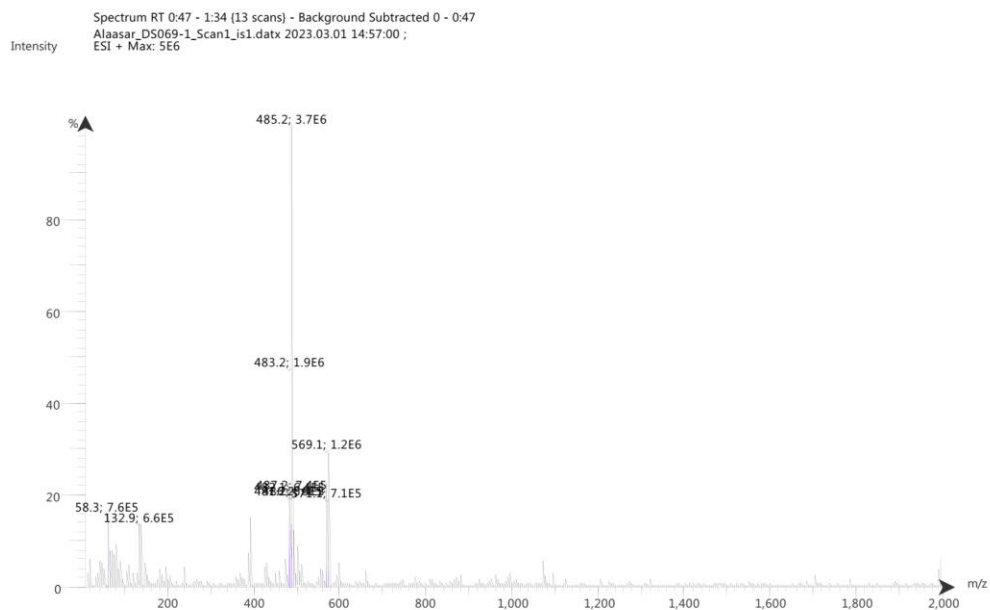

MS chart of compound 11

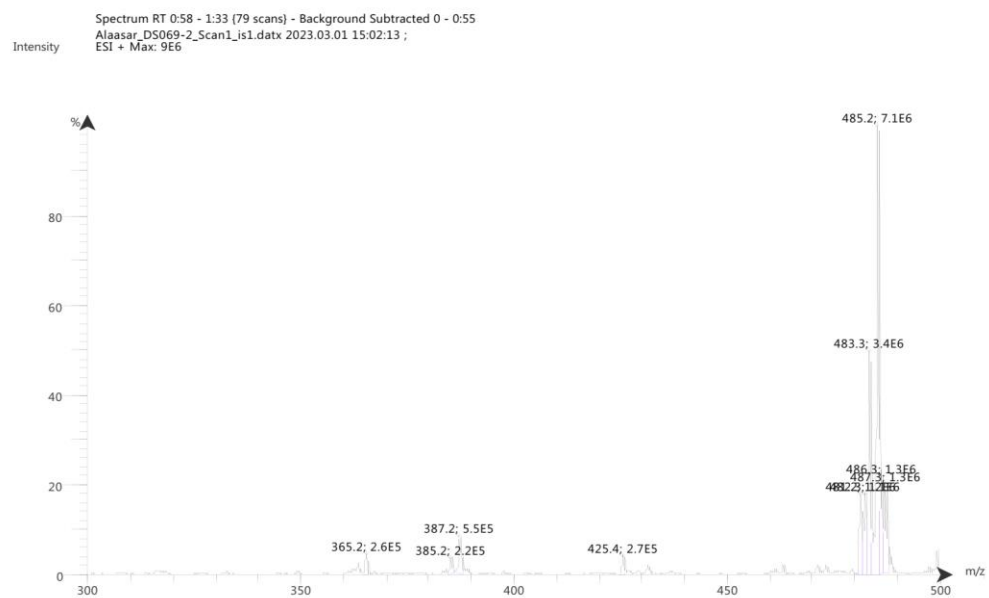

MS chart of compound **11**

*4-((2-(methoxycarbonyl)-4-(methylselanyl)phenyl)amino)-4-oxobut-2-enoic acid (12)*

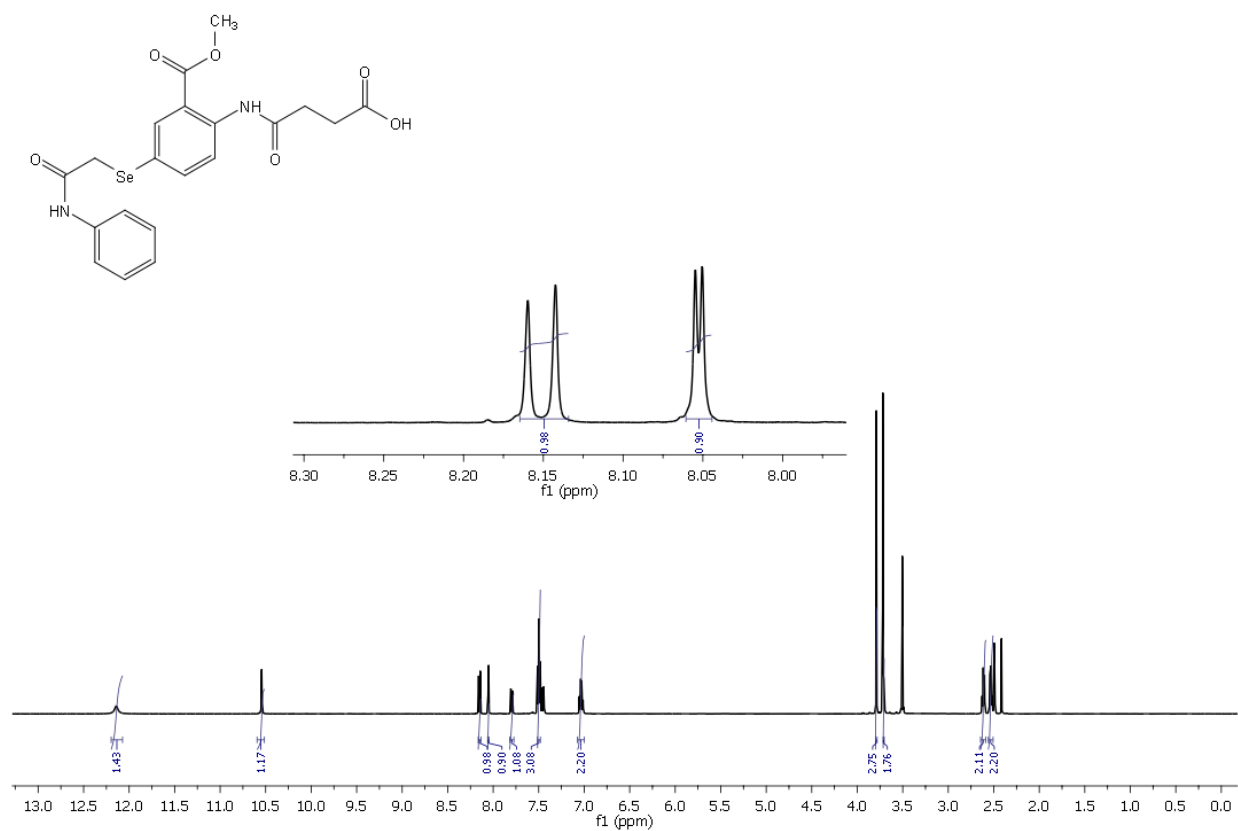

<sup>1</sup>H NMR chart of compound **12**

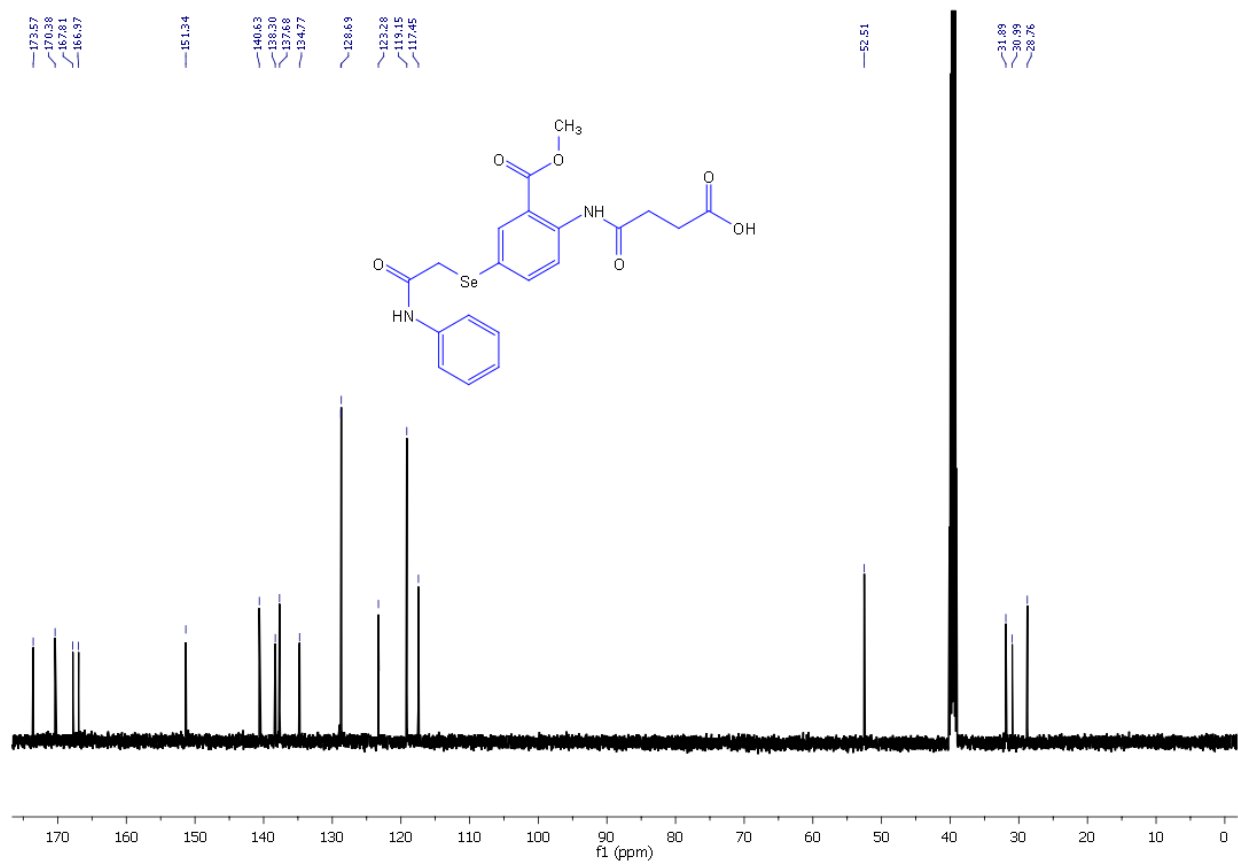

$^{13}\text{C}$ NMR chart of compound **12**

Wavenumber

3800 3600 3400 3200 3000 2800 2600 2400 2200 2000 1800 1600 1400 1200 1000 800 650

% Transmittance

100 95 90 85 80 75 70 65

DSS070

3358.437 3313.410 3279.731 1644.438 1507.511 1418.514 1382.379 1279.897 1172.505 1101.816 1053.607 1030.689 1005.004 978.124 826.611 805.711 789.125 750.438 721.391 681.212 642.125 56.125 53.612 48.125 43.125 41.125 38.125 35.125 32.125 29.125 26.125 23.125 20.125 17.125 14.125 11.125 8.125 5.125 2.125 1.125 0.125

IR chart of compound **12**

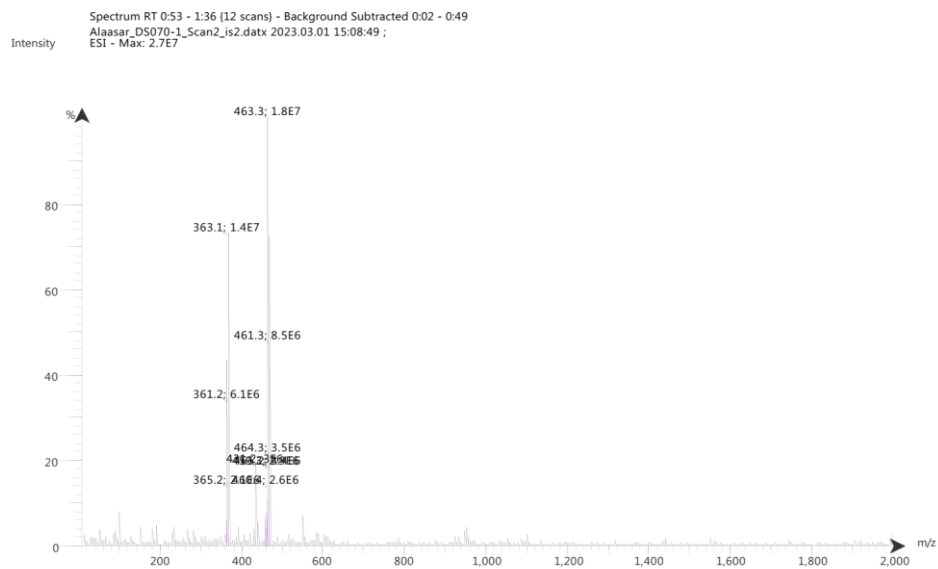

MS chart of compound 12

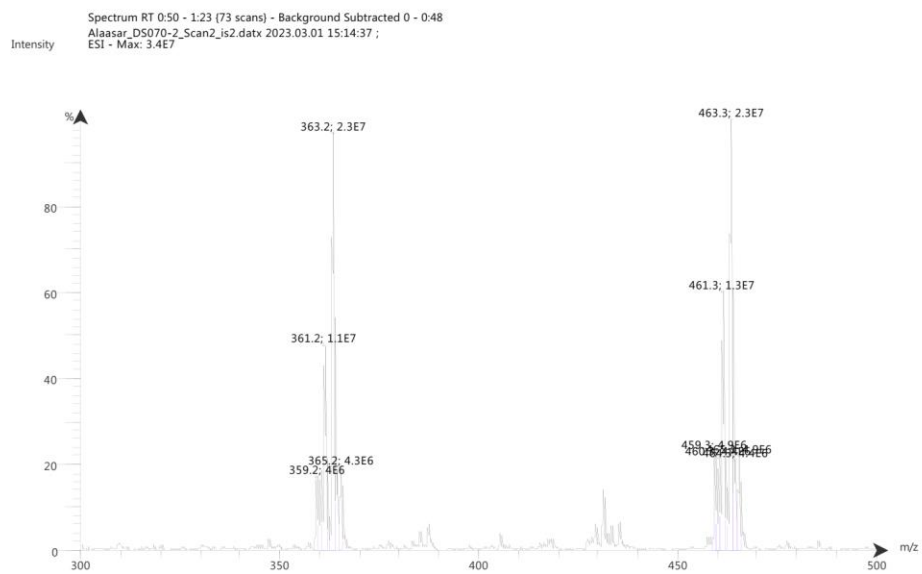

MS chart of compound 12

Spectrum RT 0:55 - 1:42 (13 scans) - Background Subtracted 0 - 0:55  
 Alaasar\_DS070-1\_Scan1\_is1.datx 2023.03.01 15:08:47 ;  
 ESI + Max: 1.3E7

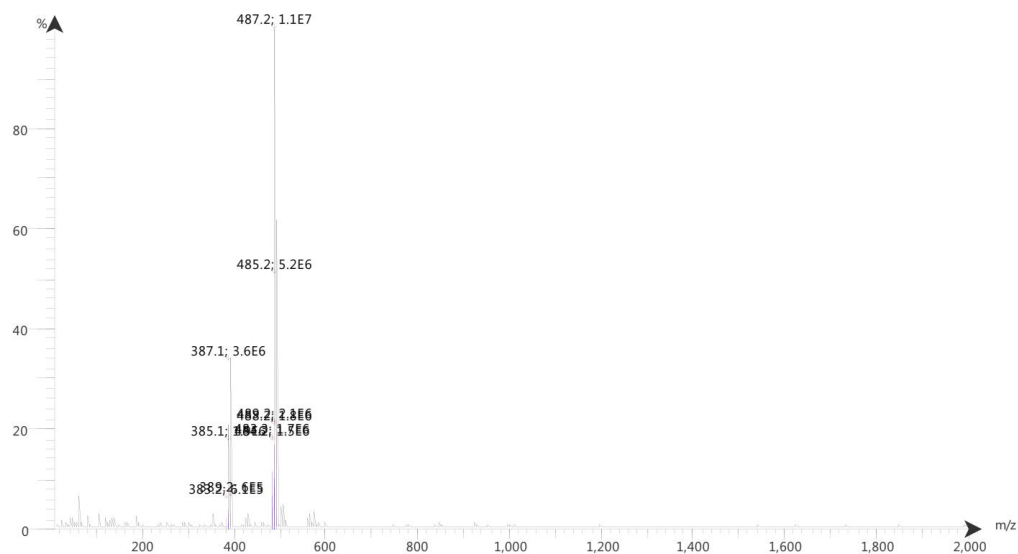

MS chart of compound 12

## References

1. Release, S. 3: Desmond molecular dynamics system, DE Shaw research, New York, NY, 2017. *Maestro-Desmond Interoperability Tools, Schrödinger, New York, NY* **2017**.
2. Harder, E.; Damm, W.; Maple, J.; Wu, C.; Reboul, M.; Xiang, J.Y.; Wang, L.; Lupyan, D.; Dahlgren, M.K.; Knight, J.L. OPLS3: a force field providing broad coverage of drug-like small molecules and proteins. *Journal of chemical theory and computation* **2016**, *12*, 281-296.
3. (a) Jorgensen, W.L.; Chandrasekhar, J.; Madura, J.D.; Impey, R.W.; Klein, M.L. Comparison of simple potential functions for simulating liquid water. *The Journal of chemical physics* **1983**, *79*, 926-935; (b) Neria, E.; Fischer, S.; Karplus, M. Simulation of activation free energies in molecular systems. *The Journal of chemical physics* **1996**, *105*, 1902-1921.
4. Manual, D.U. Desmond2. 2. **2009**.
5. (a) Martyna, G.J.; Klein, M.L.; Tuckerman, M. Nosé–Hoover chains: The canonical ensemble via continuous dynamics. *The Journal of chemical physics* **1992**, *97*, 2635-2643; (b) Martyna, G.J.; Tobias, D.J.; Klein, M.L. Constant pressure molecular dynamics algorithms. *The Journal of chemical physics* **1994**, *101*, 4177-4189.
6. (a) Al-Abdallah, B.; Al-Faiyz, Y.S.; Shaaban, S. Organoselenocyanates Tethered Methyl Anthranilate Hybrids with Promising Anticancer, Antimicrobial, and Antioxidant Activities. *Inorganics* **2022**, *10*, 246; (b) Al-Abdallah, B.; Al-Faiyz, Y.S.; Shaaban, S. Anticancer, Antimicrobial, and Antioxidant Activities of Organodiselenide-Tethered Methyl Anthranilates. *Biomolecules* **2022**, *12*, 1765.

Threshold for printing: 0.50 kcal/mol

| Donor NBO (i)         |                           | Acceptor NBO (j) | E(2) | E(j)-E(i) | F(i,j)   |      |      |
|-----------------------|---------------------------|------------------|------|-----------|----------|------|------|
|                       |                           |                  |      |           | kcal/mol | a.u. | a.u. |
| =====                 |                           |                  |      |           |          |      |      |
| within unit 1         |                           |                  |      |           |          |      |      |
| 1. BD ( 1) C 1 - C 2  | /113. RY*( 1) C 3         | 0.81             | 2.48 | 0.040     |          |      |      |
| 1. BD ( 1) C 1 - C 2  | /114. RY*( 2) C 3         | 0.66             | 1.95 | 0.032     |          |      |      |
| 1. BD ( 1) C 1 - C 2  | /127. RY*( 2) C 4         | 2.14             | 1.82 | 0.056     |          |      |      |
| 1. BD ( 1) C 1 - C 2  | /256. RY*( 1) N 13        | 0.90             | 1.52 | 0.033     |          |      |      |
| 1. BD ( 1) C 1 - C 2  | /426. BD*( 1) C 1 - C 3   | 4.27             | 1.27 | 0.066     |          |      |      |
| 1. BD ( 1) C 1 - C 2  | /428. BD*( 1) C 1 - N 13  | 0.57             | 1.02 | 0.022     |          |      |      |
| 1. BD ( 1) C 1 - C 2  | /429. BD*( 1) C 2 - C 4   | 2.92             | 1.31 | 0.055     |          |      |      |
| 1. BD ( 1) C 1 - C 2  | /431. BD*( 1) C 2 - H 23  | 0.61             | 1.10 | 0.023     |          |      |      |
| 1. BD ( 1) C 1 - C 2  | /433. BD*( 1) C 3 - C 7   | 4.39             | 1.07 | 0.062     |          |      |      |
| 1. BD ( 1) C 1 - C 2  | /435. BD*( 1) C 4 - H 24  | 2.81             | 1.10 | 0.050     |          |      |      |
| 1. BD ( 1) C 1 - C 2  | /452. BD*( 1) N 13 - H 32 | 1.59             | 1.00 | 0.036     |          |      |      |
| 2. BD ( 1) C 1 - C 3  | /100. RY*( 1) C 2         | 0.75             | 2.02 | 0.035     |          |      |      |
| 2. BD ( 1) C 1 - C 3  | /139. RY*( 1) C 5         | 0.55             | 1.87 | 0.029     |          |      |      |
| 2. BD ( 1) C 1 - C 3  | /168. RY*( 4) C 7         | 0.58             | 2.78 | 0.036     |          |      |      |
| 2. BD ( 1) C 1 - C 3  | /256. RY*( 1) N 13        | 0.69             | 1.62 | 0.030     |          |      |      |
| 2. BD ( 1) C 1 - C 3  | /425. BD*( 1) C 1 - C 2   | 3.49             | 1.20 | 0.058     |          |      |      |
| 2. BD ( 1) C 1 - C 3  | /428. BD*( 1) C 1 - N 13  | 2.09             | 1.12 | 0.043     |          |      |      |
| 2. BD ( 1) C 1 - C 3  | /431. BD*( 1) C 2 - H 23  | 1.30             | 1.20 | 0.035     |          |      |      |
| 2. BD ( 1) C 1 - C 3  | /432. BD*( 1) C 3 - C 5   | 4.24             | 1.20 | 0.064     |          |      |      |
| 2. BD ( 1) C 1 - C 3  | /433. BD*( 1) C 3 - C 7   | 2.93             | 1.17 | 0.053     |          |      |      |
| 2. BD ( 1) C 1 - C 3  | /438. BD*( 1) C 5 - H 25  | 1.31             | 1.21 | 0.036     |          |      |      |
| 2. BD ( 1) C 1 - C 3  | /441. BD*( 1) C 7 - O 9   | 1.16             | 1.26 | 0.034     |          |      |      |
| 2. BD ( 1) C 1 - C 3  | /451. BD*( 1) N 13 - C 14 | 2.09             | 1.11 | 0.044     |          |      |      |
| 3. BD ( 2) C 1 - C 3  | /102. RY*( 3) C 2         | 1.13             | 1.01 | 0.032     |          |      |      |
| 3. BD ( 2) C 1 - C 3  | /141. RY*( 3) C 5         | 0.86             | 0.86 | 0.026     |          |      |      |
| 3. BD ( 2) C 1 - C 3  | /169. RY*( 5) C 7         | 0.60             | 1.47 | 0.029     |          |      |      |
| 3. BD ( 2) C 1 - C 3  | /430. BD*( 2) C 2 - C 4   | 10.76            | 0.33 | 0.054     |          |      |      |
| 3. BD ( 2) C 1 - C 3  | /437. BD*( 2) C 5 - C 6   | 13.48            | 0.32 | 0.059     |          |      |      |
| 3. BD ( 2) C 1 - C 3  | /440. BD*( 1) C 7 - O 8   | 1.11             | 0.57 | 0.023     |          |      |      |
| 3. BD ( 2) C 1 - C 3  | /442. BD*( 2) C 7 - O 9   | 18.86            | 0.27 | 0.064     |          |      |      |
| 3. BD ( 2) C 1 - C 3  | /451. BD*( 1) N 13 - C 14 | 1.51             | 0.65 | 0.029     |          |      |      |
| 3. BD ( 2) C 1 - C 3  | /452. BD*( 1) N 13 - H 32 | 1.50             | 0.63 | 0.029     |          |      |      |
| 4. BD ( 1) C 1 - N 13 | /100. RY*( 1) C 2         | 0.53             | 2.06 | 0.030     |          |      |      |
| 4. BD ( 1) C 1 - N 13 | /113. RY*( 1) C 3         | 1.35             | 2.62 | 0.053     |          |      |      |
| 4. BD ( 1) C 1 - N 13 | /269. RY*( 1) C 14        | 1.52             | 1.68 | 0.045     |          |      |      |
| 4. BD ( 1) C 1 - N 13 | /425. BD*( 1) C 1 - C 2   | 0.64             | 1.24 | 0.025     |          |      |      |
| 4. BD ( 1) C 1 - N 13 | /426. BD*( 1) C 1 - C 3   | 2.16             | 1.41 | 0.049     |          |      |      |
| 4. BD ( 1) C 1 - N 13 | /429. BD*( 1) C 2 - C 4   | 0.86             | 1.45 | 0.031     |          |      |      |
| 4. BD ( 1) C 1 - N 13 | /432. BD*( 1) C 3 - C 5   | 2.68             | 1.24 | 0.052     |          |      |      |
| 4. BD ( 1) C 1 - N 13 | /451. BD*( 1) N 13 - C 14 | 0.86             | 1.15 | 0.029     |          |      |      |
| 4. BD ( 1) C 1 - N 13 | /453. BD*( 1) C 14 - C 15 | 1.69             | 1.22 | 0.041     |          |      |      |
| 5. BD ( 1) C 2 - C 4  | / 87. RY*( 1) C 1         | 1.41             | 1.94 | 0.047     |          |      |      |
| 5. BD ( 1) C 2 - C 4  | / 89. RY*( 3) C 1         | 0.92             | 2.00 | 0.039     |          |      |      |
| 5. BD ( 1) C 2 - C 4  | /152. RY*( 1) C 6         | 1.02             | 1.81 | 0.039     |          |      |      |
| 5. BD ( 1) C 2 - C 4  | /425. BD*( 1) C 1 - C 2   | 2.72             | 1.19 | 0.051     |          |      |      |

|                        |                          |       |      |       |
|------------------------|--------------------------|-------|------|-------|
| 5. BD ( 1) C 2 - C 4   | /428. BD*( 1) C 1 - N 13 | 2.80  | 1.12 | 0.050 |
| 5. BD ( 1) C 2 - C 4   | /431. BD*( 1) C 2 - H 23 | 1.69  | 1.20 | 0.040 |
| 5. BD ( 1) C 2 - C 4   | /434. BD*( 1) C 4 - C 6  | 3.64  | 1.21 | 0.059 |
| 5. BD ( 1) C 2 - C 4   | /435. BD*( 1) C 4 - H 24 | 1.58  | 1.19 | 0.039 |
| 5. BD ( 1) C 2 - C 4   | /439. BD*( 1) C 6 -Se 11 | 3.11  | 0.88 | 0.047 |
| 6. BD ( 2) C 2 - C 4   | / 92. RY*( 6) C 1        | 0.62  | 1.81 | 0.032 |
| 6. BD ( 2) C 2 - C 4   | /427. BD*( 2) C 1 - C 3  | 14.29 | 0.31 | 0.060 |
| 6. BD ( 2) C 2 - C 4   | /437. BD*( 2) C 5 - C 6  | 12.96 | 0.31 | 0.057 |
| 7. BD ( 1) C 2 - H 23  | / 87. RY*( 1) C 1        | 0.64  | 1.71 | 0.030 |
| 7. BD ( 1) C 2 - H 23  | / 88. RY*( 2) C 1        | 0.88  | 1.83 | 0.036 |
| 7. BD ( 1) C 2 - H 23  | /126. RY*( 1) C 4        | 1.44  | 1.68 | 0.044 |
| 7. BD ( 1) C 2 - H 23  | /426. BD*( 1) C 1 - C 3  | 3.22  | 1.14 | 0.054 |
| 7. BD ( 1) C 2 - H 23  | /428. BD*( 1) C 1 - N 13 | 0.61  | 0.89 | 0.021 |
| 7. BD ( 1) C 2 - H 23  | /429. BD*( 1) C 2 - C 4  | 1.59  | 1.18 | 0.039 |
| 7. BD ( 1) C 2 - H 23  | /434. BD*( 1) C 4 - C 6  | 5.69  | 0.98 | 0.067 |
| 7. BD ( 1) C 2 - H 23  | /435. BD*( 1) C 4 - H 24 | 0.95  | 0.96 | 0.027 |
| 8. BD ( 1) C 3 - C 5   | / 88. RY*( 2) C 1        | 1.22  | 1.95 | 0.044 |
| 8. BD ( 1) C 3 - C 5   | /153. RY*( 2) C 6        | 1.32  | 1.47 | 0.040 |
| 8. BD ( 1) C 3 - C 5   | /165. RY*( 1) C 7        | 0.99  | 1.58 | 0.036 |
| 8. BD ( 1) C 3 - C 5   | /426. BD*( 1) C 1 - C 3  | 4.59  | 1.26 | 0.068 |
| 8. BD ( 1) C 3 - C 5   | /428. BD*( 1) C 1 - N 13 | 5.36  | 1.01 | 0.066 |
| 8. BD ( 1) C 3 - C 5   | /433. BD*( 1) C 3 - C 7  | 1.67  | 1.06 | 0.038 |
| 8. BD ( 1) C 3 - C 5   | /436. BD*( 1) C 5 - C 6  | 3.91  | 1.29 | 0.064 |
| 8. BD ( 1) C 3 - C 5   | /438. BD*( 1) C 5 - H 25 | 0.63  | 1.10 | 0.024 |
| 8. BD ( 1) C 3 - C 5   | /439. BD*( 1) C 6 -Se 11 | 5.50  | 0.78 | 0.058 |
| 8. BD ( 1) C 3 - C 5   | /440. BD*( 1) C 7 - O 8  | 2.84  | 0.92 | 0.046 |
| 8. BD ( 1) C 3 - C 5   | /442. BD*( 2) C 7 - O 9  | 0.55  | 0.63 | 0.017 |
| 9. BD ( 1) C 3 - C 7   | / 87. RY*( 1) C 1        | 0.84  | 1.88 | 0.036 |
| 9. BD ( 1) C 3 - C 7   | / 88. RY*( 2) C 1        | 1.04  | 2.00 | 0.041 |
| 9. BD ( 1) C 3 - C 7   | /139. RY*( 1) C 5        | 1.02  | 1.80 | 0.038 |
| 9. BD ( 1) C 3 - C 7   | /191. RY*( 1) O 9        | 0.72  | 1.81 | 0.032 |
| 9. BD ( 1) C 3 - C 7   | /425. BD*( 1) C 1 - C 2  | 3.77  | 1.13 | 0.058 |
| 9. BD ( 1) C 3 - C 7   | /426. BD*( 1) C 1 - C 3  | 3.96  | 1.30 | 0.064 |
| 9. BD ( 1) C 3 - C 7   | /432. BD*( 1) C 3 - C 5  | 1.28  | 1.13 | 0.034 |
| 9. BD ( 1) C 3 - C 7   | /436. BD*( 1) C 5 - C 6  | 1.47  | 1.33 | 0.040 |
| 9. BD ( 1) C 3 - C 7   | /441. BD*( 1) C 7 - O 9  | 0.95  | 1.19 | 0.030 |
| 9. BD ( 1) C 3 - C 7   | /443. BD*( 1) O 8 - C 10 | 2.85  | 0.96 | 0.047 |
| 10. BD ( 1) C 4 - C 6  | /100. RY*( 1) C 2        | 0.75  | 1.93 | 0.034 |
| 10. BD ( 1) C 4 - C 6  | /101. RY*( 2) C 2        | 1.59  | 2.01 | 0.051 |
| 10. BD ( 1) C 4 - C 6  | /139. RY*( 1) C 5        | 0.92  | 1.79 | 0.036 |
| 10. BD ( 1) C 4 - C 6  | /140. RY*( 2) C 5        | 0.86  | 1.61 | 0.033 |
| 10. BD ( 1) C 4 - C 6  | /429. BD*( 1) C 2 - C 4  | 3.19  | 1.32 | 0.058 |
| 10. BD ( 1) C 4 - C 6  | /431. BD*( 1) C 2 - H 23 | 2.66  | 1.12 | 0.049 |
| 10. BD ( 1) C 4 - C 6  | /435. BD*( 1) C 4 - H 24 | 0.87  | 1.11 | 0.028 |
| 10. BD ( 1) C 4 - C 6  | /436. BD*( 1) C 5 - C 6  | 3.48  | 1.32 | 0.060 |
| 10. BD ( 1) C 4 - C 6  | /438. BD*( 1) C 5 - H 25 | 3.43  | 1.12 | 0.055 |
| 11. BD ( 1) C 4 - H 24 | /100. RY*( 1) C 2        | 1.53  | 1.79 | 0.047 |
| 11. BD ( 1) C 4 - H 24 | /152. RY*( 1) C 6        | 1.14  | 1.59 | 0.038 |
| 11. BD ( 1) C 4 - H 24 | /425. BD*( 1) C 1 - C 2  | 5.69  | 0.97 | 0.066 |
| 11. BD ( 1) C 4 - H 24 | /429. BD*( 1) C 2 - C 4  | 1.50  | 1.18 | 0.038 |
| 11. BD ( 1) C 4 - H 24 | /431. BD*( 1) C 2 - H 23 | 0.96  | 0.97 | 0.027 |
| 11. BD ( 1) C 4 - H 24 | /436. BD*( 1) C 5 - C 6  | 3.19  | 1.17 | 0.055 |
| 12. BD ( 1) C 5 - C 6  | /113. RY*( 1) C 3        | 1.43  | 2.59 | 0.055 |
| 12. BD ( 1) C 5 - C 6  | /114. RY*( 2) C 3        | 0.71  | 2.05 | 0.034 |
| 12. BD ( 1) C 5 - C 6  | /126. RY*( 1) C 4        | 1.05  | 1.92 | 0.040 |

|                          |                            |       |      |       |
|--------------------------|----------------------------|-------|------|-------|
| 12. BD ( 1) C 5 - C 6    | /432. BD*( 1) C 3 - C 5    | 3.31  | 1.21 | 0.057 |
| 12. BD ( 1) C 5 - C 6    | /433. BD*( 1) C 3 - C 7    | 2.02  | 1.18 | 0.044 |
| 12. BD ( 1) C 5 - C 6    | /434. BD*( 1) C 4 - C 6    | 3.12  | 1.23 | 0.055 |
| 12. BD ( 1) C 5 - C 6    | /435. BD*( 1) C 4 - H 24   | 1.64  | 1.21 | 0.040 |
| 12. BD ( 1) C 5 - C 6    | /438. BD*( 1) C 5 - H 25   | 2.32  | 1.22 | 0.047 |
| 13. BD ( 2) C 5 - C 6    | /116. RY*( 4) C 3          | 0.59  | 1.06 | 0.024 |
| 13. BD ( 2) C 5 - C 6    | /128. RY*( 3) C 4          | 1.69  | 1.12 | 0.041 |
| 13. BD ( 2) C 5 - C 6    | /217. RY*( 1) Se 11        | 0.99  | 0.77 | 0.026 |
| 13. BD ( 2) C 5 - C 6    | /427. BD*( 2) C 1 - C 3    | 11.95 | 0.31 | 0.056 |
| 13. BD ( 2) C 5 - C 6    | /430. BD*( 2) C 2 - C 4    | 13.06 | 0.32 | 0.059 |
| 14. BD ( 1) C 5 - H 25   | /113. RY*( 1) C 3          | 1.80  | 2.35 | 0.058 |
| 14. BD ( 1) C 5 - H 25   | /152. RY*( 1) C 6          | 1.74  | 1.58 | 0.047 |
| 14. BD ( 1) C 5 - H 25   | /426. BD*( 1) C 1 - C 3    | 3.09  | 1.14 | 0.053 |
| 14. BD ( 1) C 5 - H 25   | /434. BD*( 1) C 4 - C 6    | 5.98  | 0.98 | 0.069 |
| 14. BD ( 1) C 5 - H 25   | /436. BD*( 1) C 5 - C 6    | 2.17  | 1.17 | 0.045 |
| 15. BD ( 1) C 6 - Se 11  | /126. RY*( 1) C 4          | 1.99  | 1.74 | 0.053 |
| 15. BD ( 1) C 6 - Se 11  | /139. RY*( 1) C 5          | 1.60  | 1.70 | 0.047 |
| 15. BD ( 1) C 6 - Se 11  | /243. RY*( 1) C 12         | 0.59  | 1.58 | 0.027 |
| 15. BD ( 1) C 6 - Se 11  | /429. BD*( 1) C 2 - C 4    | 2.65  | 1.24 | 0.051 |
| 15. BD ( 1) C 6 - Se 11  | /432. BD*( 1) C 3 - C 5    | 5.23  | 1.03 | 0.066 |
| 15. BD ( 1) C 6 - Se 11  | /436. BD*( 1) C 5 - C 6    | 0.95  | 1.23 | 0.031 |
| 15. BD ( 1) C 6 - Se 11  | /438. BD*( 1) C 5 - H 25   | 0.95  | 1.04 | 0.028 |
| 15. BD ( 1) C 6 - Se 11  | /447. BD*( 1) Se 11 - C 12 | 0.51  | 0.69 | 0.017 |
| 15. BD ( 1) C 6 - Se 11  | /449. BD*( 1) C 12 - H 30  | 0.94  | 0.97 | 0.027 |
| 16. BD ( 1) C 7 - O 8    | /114. RY*( 2) C 3          | 1.04  | 2.16 | 0.042 |
| 16. BD ( 1) C 7 - O 8    | /206. RY*( 3) C 10         | 1.07  | 1.84 | 0.040 |
| 16. BD ( 1) C 7 - O 8    | /432. BD*( 1) C 3 - C 5    | 1.27  | 1.31 | 0.037 |
| 16. BD ( 1) C 7 - O 8    | /446. BD*( 1) C 10 - H 28  | 0.66  | 1.24 | 0.025 |
| 17. BD ( 1) C 7 - O 9    | /114. RY*( 2) C 3          | 1.32  | 2.29 | 0.049 |
| 17. BD ( 1) C 7 - O 9    | /165. RY*( 1) C 7          | 1.64  | 1.94 | 0.050 |
| 17. BD ( 1) C 7 - O 9    | /426. BD*( 1) C 1 - C 3    | 1.54  | 1.62 | 0.045 |
| 17. BD ( 1) C 7 - O 9    | /433. BD*( 1) C 3 - C 7    | 1.77  | 1.42 | 0.045 |
| 18. BD ( 2) C 7 - O 9    | /427. BD*( 2) C 1 - C 3    | 4.53  | 0.40 | 0.041 |
| 18. BD ( 2) C 7 - O 9    | /442. BD*( 2) C 7 - O 9    | 0.65  | 0.36 | 0.014 |
| 19. BD ( 1) O 8 - C 10   | /165. RY*( 1) C 7          | 1.27  | 1.77 | 0.042 |
| 19. BD ( 1) O 8 - C 10   | /433. BD*( 1) C 3 - C 7    | 2.61  | 1.26 | 0.052 |
| 20. BD ( 1) C 10 - H 26  | /179. RY*( 2) O 8          | 0.58  | 1.51 | 0.026 |
| 20. BD ( 1) C 10 - H 26  | /443. BD*( 1) O 8 - C 10   | 0.58  | 0.79 | 0.019 |
| 21. BD ( 1) C 10 - H 27  | /179. RY*( 2) O 8          | 0.53  | 1.51 | 0.025 |
| 22. BD ( 1) C 10 - H 28  | /440. BD*( 1) C 7 - O 8    | 3.93  | 0.80 | 0.051 |
| 23. BD ( 1) Se 11 - C 12 | /152. RY*( 1) C 6          | 0.64  | 1.63 | 0.029 |
| 23. BD ( 1) Se 11 - C 12 | /434. BD*( 1) C 4 - C 6    | 1.79  | 1.03 | 0.038 |
| 23. BD ( 1) Se 11 - C 12 | /437. BD*( 2) C 5 - C 6    | 0.81  | 0.60 | 0.021 |
| 25. BD ( 1) C 12 - H 30  | /439. BD*( 1) C 6 - Se 11  | 1.01  | 0.65 | 0.023 |
| 27. BD ( 1) N 13 - C 14  | / 87. RY*( 1) C 1          | 0.74  | 1.99 | 0.034 |
| 27. BD ( 1) N 13 - C 14  | / 88. RY*( 2) C 1          | 0.77  | 2.10 | 0.036 |
| 27. BD ( 1) N 13 - C 14  | /283. RY*( 2) C 15         | 1.00  | 1.89 | 0.039 |
| 27. BD ( 1) N 13 - C 14  | /426. BD*( 1) C 1 - C 3    | 1.62  | 1.41 | 0.043 |
| 27. BD ( 1) N 13 - C 14  | /428. BD*( 1) C 1 - N 13   | 1.06  | 1.16 | 0.031 |
| 27. BD ( 1) N 13 - C 14  | /456. BD*( 1) C 15 - C 17  | 1.10  | 1.42 | 0.035 |
| 28. BD ( 1) N 13 - H 32  | / 87. RY*( 1) C 1          | 1.08  | 1.85 | 0.040 |
| 28. BD ( 1) N 13 - H 32  | /270. RY*( 2) C 14         | 0.83  | 2.04 | 0.037 |
| 28. BD ( 1) N 13 - H 32  | /272. RY*( 4) C 14         | 0.92  | 3.07 | 0.048 |
| 28. BD ( 1) N 13 - H 32  | /425. BD*( 1) C 1 - C 2    | 2.10  | 1.10 | 0.043 |
| 28. BD ( 1) N 13 - H 32  | /427. BD*( 2) C 1 - C 3    | 1.54  | 0.69 | 0.031 |

|                         |                           |                  |
|-------------------------|---------------------------|------------------|
| 28. BD ( 1) N 13 - H 32 | /454. BD*( 1) C 14 - O 16 | 2.95 1.18 0.053  |
| 29. BD ( 1) C 14 - C 15 | /257. RY*( 2) N 13        | 1.35 1.77 0.044  |
| 29. BD ( 1) C 14 - C 15 | /295. RY*( 1) O 16        | 0.63 1.86 0.031  |
| 29. BD ( 1) C 14 - C 15 | /308. RY*( 1) C 17        | 2.27 1.82 0.058  |
| 29. BD ( 1) C 14 - C 15 | /428. BD*( 1) C 1 - N 13  | 2.92 1.07 0.050  |
| 29. BD ( 1) C 14 - C 15 | /454. BD*( 1) C 14 - O 16 | 0.96 1.21 0.031  |
| 29. BD ( 1) C 14 - C 15 | /456. BD*( 1) C 15 - C 17 | 2.75 1.32 0.054  |
| 29. BD ( 1) C 14 - C 15 | /459. BD*( 1) C 17 - C 18 | 3.42 1.11 0.055  |
| 30. BD ( 1) C 14 - O 16 | /269. RY*( 1) C 14        | 1.66 1.88 0.050  |
| 30. BD ( 1) C 14 - O 16 | /451. BD*( 1) N 13 - C 14 | 0.54 1.36 0.025  |
| 30. BD ( 1) C 14 - O 16 | /452. BD*( 1) N 13 - H 32 | 1.15 1.34 0.035  |
| 30. BD ( 1) C 14 - O 16 | /453. BD*( 1) C 14 - C 15 | 1.56 1.43 0.043  |
| 30. BD ( 1) C 14 - O 16 | /458. BD*( 1) C 15 - H 21 | 0.86 1.42 0.031  |
| 31. BD ( 2) C 14 - O 16 | /285. RY*( 4) C 15        | 0.64 1.03 0.023  |
| 31. BD ( 2) C 14 - O 16 | /455. BD*( 2) C 14 - O 16 | 0.75 0.35 0.016  |
| 31. BD ( 2) C 14 - O 16 | /457. BD*( 2) C 15 - C 17 | 5.17 0.38 0.040  |
| 32. BD ( 1) C 15 - C 17 | /269. RY*( 1) C 14        | 2.16 1.66 0.053  |
| 32. BD ( 1) C 15 - C 17 | /321. RY*( 1) C 18        | 2.20 1.66 0.054  |
| 32. BD ( 1) C 15 - C 17 | /451. BD*( 1) N 13 - C 14 | 2.46 1.14 0.048  |
| 32. BD ( 1) C 15 - C 17 | /453. BD*( 1) C 14 - C 15 | 2.35 1.20 0.048  |
| 32. BD ( 1) C 15 - C 17 | /458. BD*( 1) C 15 - H 21 | 1.64 1.20 0.040  |
| 32. BD ( 1) C 15 - C 17 | /459. BD*( 1) C 17 - C 18 | 2.01 1.19 0.044  |
| 32. BD ( 1) C 15 - C 17 | /460. BD*( 1) C 17 - H 22 | 1.69 1.21 0.040  |
| 32. BD ( 1) C 15 - C 17 | /461. BD*( 1) C 18 - O 19 | 2.33 1.06 0.045  |
| 33. BD ( 2) C 15 - C 17 | /273. RY*( 5) C 14        | 0.76 1.57 0.032  |
| 33. BD ( 2) C 15 - C 17 | /325. RY*( 5) C 18        | 0.96 1.63 0.037  |
| 33. BD ( 2) C 15 - C 17 | /455. BD*( 2) C 14 - O 16 | 17.55 0.29 0.066 |
| 33. BD ( 2) C 15 - C 17 | /463. BD*( 2) C 18 - O 20 | 19.28 0.28 0.067 |
| 34. BD ( 1) C 15 - H 21 | /270. RY*( 2) C 14        | 0.64 1.93 0.031  |
| 34. BD ( 1) C 15 - H 21 | /272. RY*( 4) C 14        | 0.73 2.96 0.042  |
| 34. BD ( 1) C 15 - H 21 | /308. RY*( 1) C 17        | 1.01 1.67 0.037  |
| 34. BD ( 1) C 15 - H 21 | /309. RY*( 2) C 17        | 0.64 1.60 0.029  |
| 34. BD ( 1) C 15 - H 21 | /454. BD*( 1) C 14 - O 16 | 3.45 1.06 0.054  |
| 34. BD ( 1) C 15 - H 21 | /456. BD*( 1) C 15 - C 17 | 1.48 1.17 0.037  |
| 34. BD ( 1) C 15 - H 21 | /460. BD*( 1) C 17 - H 22 | 4.53 0.98 0.059  |
| 35. BD ( 1) C 17 - C 18 | /282. RY*( 1) C 15        | 2.14 1.74 0.055  |
| 35. BD ( 1) C 17 - C 18 | /347. RY*( 1) O 20        | 0.75 1.78 0.033  |
| 35. BD ( 1) C 17 - C 18 | /453. BD*( 1) C 14 - C 15 | 3.38 1.13 0.056  |
| 35. BD ( 1) C 17 - C 18 | /456. BD*( 1) C 15 - C 17 | 2.34 1.33 0.050  |
| 35. BD ( 1) C 17 - C 18 | /462. BD*( 1) C 18 - O 20 | 0.75 1.22 0.027  |
| 35. BD ( 1) C 17 - C 18 | /464. BD*( 1) O 19 - H 33 | 1.70 1.01 0.037  |
| 36. BD ( 1) C 17 - H 22 | /282. RY*( 1) C 15        | 1.05 1.57 0.036  |
| 36. BD ( 1) C 17 - H 22 | /283. RY*( 2) C 15        | 0.66 1.63 0.029  |
| 36. BD ( 1) C 17 - H 22 | /324. RY*( 4) C 18        | 0.69 2.81 0.040  |
| 36. BD ( 1) C 17 - H 22 | /456. BD*( 1) C 15 - C 17 | 1.67 1.16 0.039  |
| 36. BD ( 1) C 17 - H 22 | /458. BD*( 1) C 15 - H 21 | 4.95 0.96 0.062  |
| 36. BD ( 1) C 17 - H 22 | /461. BD*( 1) C 18 - O 19 | 0.50 0.82 0.018  |
| 36. BD ( 1) C 17 - H 22 | /462. BD*( 1) C 18 - O 20 | 3.24 1.05 0.052  |
| 37. BD ( 1) C 18 - O 19 | /309. RY*( 2) C 17        | 0.72 1.97 0.034  |
| 37. BD ( 1) C 18 - O 19 | /456. BD*( 1) C 15 - C 17 | 1.02 1.53 0.035  |
| 38. BD ( 1) C 18 - O 20 | /309. RY*( 2) C 17        | 0.58 2.06 0.031  |
| 38. BD ( 1) C 18 - O 20 | /321. RY*( 1) C 18        | 1.59 1.90 0.049  |
| 38. BD ( 1) C 18 - O 20 | /459. BD*( 1) C 17 - C 18 | 1.40 1.42 0.040  |
| 38. BD ( 1) C 18 - O 20 | /460. BD*( 1) C 17 - H 22 | 0.88 1.44 0.032  |
| 39. BD ( 2) C 18 - O 20 | /311. RY*( 4) C 17        | 0.64 0.96 0.022  |

|                         |                           |                  |
|-------------------------|---------------------------|------------------|
| 39. BD ( 2) C 18 - O 20 | /457. BD*( 2) C 15 - C 17 | 5.11 0.39 0.040  |
| 39. BD ( 2) C 18 - O 20 | /463. BD*( 2) C 18 - O 20 | 0.73 0.35 0.015  |
| 40. BD ( 1) O 19 - H 33 | /321. RY*( 1) C 18        | 0.95 1.62 0.035  |
| 40. BD ( 1) O 19 - H 33 | /322. RY*( 2) C 18        | 0.73 2.05 0.035  |
| 40. BD ( 1) O 19 - H 33 | /327. RY*( 7) C 18        | 0.69 2.04 0.034  |
| 40. BD ( 1) O 19 - H 33 | /459. BD*( 1) C 17 - C 18 | 3.64 1.15 0.058  |
| 40. BD ( 1) O 19 - H 33 | /462. BD*( 1) C 18 - O 20 | 1.29 1.24 0.036  |
| 41. CR ( 1) C 1         | /101. RY*( 2) C 2         | 0.95 11.45 0.093 |
| 41. CR ( 1) C 1         | /113. RY*( 1) C 3         | 0.51 11.94 0.070 |
| 41. CR ( 1) C 1         | /114. RY*( 2) C 3         | 1.71 11.41 0.125 |
| 41. CR ( 1) C 1         | /426. BD*( 1) C 1 - C 3   | 1.37 10.73 0.109 |
| 41. CR ( 1) C 1         | /429. BD*( 1) C 2 - C 4   | 0.57 10.77 0.070 |
| 41. CR ( 1) C 1         | /432. BD*( 1) C 3 - C 5   | 1.03 10.56 0.094 |
| 41. CR ( 1) C 1         | /433. BD*( 1) C 3 - C 7   | 1.11 10.53 0.098 |
| 41. CR ( 1) C 1         | /451. BD*( 1) N 13 - C 14 | 1.03 10.47 0.094 |
| 42. CR ( 1) C 2         | / 88. RY*( 2) C 1         | 1.36 11.36 0.111 |
| 42. CR ( 1) C 2         | /126. RY*( 1) C 4         | 0.59 11.21 0.073 |
| 42. CR ( 1) C 2         | /127. RY*( 2) C 4         | 1.74 11.21 0.125 |
| 42. CR ( 1) C 2         | /426. BD*( 1) C 1 - C 3   | 0.83 10.67 0.085 |
| 42. CR ( 1) C 2         | /428. BD*( 1) C 1 - N 13  | 0.54 10.42 0.067 |
| 42. CR ( 1) C 2         | /429. BD*( 1) C 2 - C 4   | 0.83 10.70 0.084 |
| 42. CR ( 1) C 2         | /434. BD*( 1) C 4 - C 6   | 1.31 10.51 0.105 |
| 43. CR ( 1) C 3         | / 87. RY*( 1) C 1         | 1.15 11.27 0.102 |
| 43. CR ( 1) C 3         | / 89. RY*( 3) C 1         | 1.00 11.32 0.095 |
| 43. CR ( 1) C 3         | /140. RY*( 2) C 5         | 0.69 11.02 0.078 |
| 43. CR ( 1) C 3         | /166. RY*( 2) C 7         | 0.60 11.51 0.074 |
| 43. CR ( 1) C 3         | /171. RY*( 7) C 7         | 0.84 11.19 0.086 |
| 43. CR ( 1) C 3         | /425. BD*( 1) C 1 - C 2   | 1.09 10.52 0.096 |
| 43. CR ( 1) C 3         | /426. BD*( 1) C 1 - C 3   | 1.23 10.69 0.103 |
| 43. CR ( 1) C 3         | /428. BD*( 1) C 1 - N 13  | 1.03 10.44 0.093 |
| 43. CR ( 1) C 3         | /436. BD*( 1) C 5 - C 6   | 0.72 10.72 0.079 |
| 43. CR ( 1) C 3         | /440. BD*( 1) C 7 - O 8   | 0.61 10.35 0.073 |
| 44. CR ( 1) C 4         | /101. RY*( 2) C 2         | 1.34 11.39 0.110 |
| 44. CR ( 1) C 4         | /103. RY*( 4) C 2         | 0.66 11.07 0.076 |
| 44. CR ( 1) C 4         | /153. RY*( 2) C 6         | 1.13 10.87 0.099 |
| 44. CR ( 1) C 4         | /155. RY*( 4) C 6         | 0.75 11.11 0.081 |
| 44. CR ( 1) C 4         | /425. BD*( 1) C 1 - C 2   | 1.21 10.49 0.101 |
| 44. CR ( 1) C 4         | /429. BD*( 1) C 2 - C 4   | 0.67 10.70 0.076 |
| 44. CR ( 1) C 4         | /436. BD*( 1) C 5 - C 6   | 0.82 10.69 0.084 |
| 44. CR ( 1) C 4         | /439. BD*( 1) C 6 -Se 11  | 0.81 10.18 0.082 |
| 45. CR ( 1) C 5         | /114. RY*( 2) C 3         | 0.77 11.34 0.083 |
| 45. CR ( 1) C 5         | /152. RY*( 1) C 6         | 0.98 11.11 0.093 |
| 45. CR ( 1) C 5         | /153. RY*( 2) C 6         | 1.93 10.87 0.130 |
| 45. CR ( 1) C 5         | /154. RY*( 3) C 6         | 0.66 10.94 0.076 |
| 45. CR ( 1) C 5         | /426. BD*( 1) C 1 - C 3   | 0.76 10.66 0.081 |
| 45. CR ( 1) C 5         | /433. BD*( 1) C 3 - C 7   | 0.65 10.46 0.075 |
| 45. CR ( 1) C 5         | /434. BD*( 1) C 4 - C 6   | 1.23 10.51 0.102 |
| 45. CR ( 1) C 5         | /436. BD*( 1) C 5 - C 6   | 1.20 10.70 0.102 |
| 45. CR ( 1) C 5         | /439. BD*( 1) C 6 -Se 11  | 1.24 10.18 0.101 |
| 46. CR ( 1) C 6         | /127. RY*( 2) C 4         | 1.04 11.25 0.096 |
| 46. CR ( 1) C 6         | /129. RY*( 4) C 4         | 0.50 11.05 0.066 |
| 46. CR ( 1) C 6         | /140. RY*( 2) C 5         | 2.16 11.03 0.138 |
| 46. CR ( 1) C 6         | /142. RY*( 4) C 5         | 0.62 11.15 0.074 |
| 46. CR ( 1) C 6         | /429. BD*( 1) C 2 - C 4   | 0.63 10.74 0.073 |
| 46. CR ( 1) C 6         | /432. BD*( 1) C 3 - C 5   | 1.17 10.53 0.100 |

|                   |                            |                  |
|-------------------|----------------------------|------------------|
| 46. CR ( 1) C 6   | /436. BD*( 1) C 5 - C 6    | 1.22 10.73 0.103 |
| 46. CR ( 1) C 6   | /438. BD*( 1) C 5 - H 25   | 0.56 10.54 0.069 |
| 46. CR ( 1) C 6   | /439. BD*( 1) C 6 - Se 11  | 1.35 10.22 0.105 |
| 47. CR ( 1) C 7   | /113. RY*( 1) C 3          | 1.20 12.04 0.107 |
| 47. CR ( 1) C 7   | /426. BD*( 1) C 1 - C 3    | 0.87 10.83 0.087 |
| 47. CR ( 1) C 7   | /432. BD*( 1) C 3 - C 5    | 0.54 10.66 0.068 |
| 47. CR ( 1) C 7   | /433. BD*( 1) C 3 - C 7    | 0.56 10.63 0.069 |
| 47. CR ( 1) C 7   | /440. BD*( 1) C 7 - O 8    | 0.67 10.49 0.077 |
| 47. CR ( 1) C 7   | /443. BD*( 1) O 8 - C 10   | 1.11 10.48 0.096 |
| 48. CR ( 1) O 8   | /165. RY*( 1) C 7          | 1.01 19.92 0.127 |
| 48. CR ( 1) O 8   | /166. RY*( 2) C 7          | 1.11 20.42 0.135 |
| 48. CR ( 1) O 8   | /206. RY*( 3) C 10         | 0.91 19.96 0.121 |
| 49. CR ( 1) O 9   | /165. RY*( 1) C 7          | 5.27 19.81 0.290 |
| 49. CR ( 1) O 9   | /433. BD*( 1) C 3 - C 7    | 0.78 19.29 0.111 |
| 50. CR ( 1) C 10  | /396. RY*( 2) H 28         | 0.60 12.19 0.076 |
| 50. CR ( 1) C 10  | /440. BD*( 1) C 7 - O 8    | 1.10 10.40 0.098 |
| 50. CR ( 1) C 10  | /443. BD*( 1) O 8 - C 10   | 1.49 10.39 0.111 |
| 53. CR ( 3) Se 11 | /152. RY*( 1) C 6          | 1.00 11.34 0.095 |
| 53. CR ( 3) Se 11 | /246. RY*( 4) C 12         | 0.60 11.19 0.073 |
| 53. CR ( 3) Se 11 | /434. BD*( 1) C 4 - C 6    | 0.74 10.74 0.080 |
| 53. CR ( 3) Se 11 | /436. BD*( 1) C 5 - C 6    | 1.24 10.92 0.105 |
| 65. CR ( 1) C 12  | /447. BD*( 1) Se 11 - C 12 | 1.46 10.19 0.109 |
| 66. CR ( 1) N 13  | / 87. RY*( 1) C 1          | 1.11 15.41 0.117 |
| 66. CR ( 1) N 13  | / 88. RY*( 2) C 1          | 0.54 15.52 0.082 |
| 66. CR ( 1) N 13  | /270. RY*( 2) C 14         | 1.43 15.60 0.133 |
| 66. CR ( 1) N 13  | /426. BD*( 1) C 1 - C 3    | 0.59 14.83 0.084 |
| 67. CR ( 1) C 14  | /283. RY*( 2) C 15         | 0.56 11.28 0.071 |
| 67. CR ( 1) C 14  | /428. BD*( 1) C 1 - N 13   | 1.14 10.56 0.099 |
| 67. CR ( 1) C 14  | /456. BD*( 1) C 15 - C 17  | 0.65 10.81 0.075 |
| 68. CR ( 1) C 15  | /270. RY*( 2) C 14         | 1.07 11.46 0.099 |
| 68. CR ( 1) C 15  | /309. RY*( 2) C 17         | 1.86 11.14 0.129 |
| 68. CR ( 1) C 15  | /310. RY*( 3) C 17         | 0.53 11.25 0.069 |
| 68. CR ( 1) C 15  | /451. BD*( 1) N 13 - C 14  | 0.51 10.44 0.067 |
| 68. CR ( 1) C 15  | /456. BD*( 1) C 15 - C 17  | 0.66 10.70 0.075 |
| 68. CR ( 1) C 15  | /459. BD*( 1) C 17 - C 18  | 1.06 10.50 0.095 |
| 69. CR ( 1) O 16  | /269. RY*( 1) C 14         | 5.52 19.74 0.296 |
| 69. CR ( 1) O 16  | /453. BD*( 1) C 14 - C 15  | 0.75 19.28 0.109 |
| 70. CR ( 1) C 17  | /283. RY*( 2) C 15         | 1.59 11.17 0.119 |
| 70. CR ( 1) C 17  | /284. RY*( 3) C 15         | 0.70 11.38 0.080 |
| 70. CR ( 1) C 17  | /322. RY*( 2) C 18         | 0.78 11.39 0.084 |
| 70. CR ( 1) C 17  | /327. RY*( 7) C 18         | 0.58 11.39 0.073 |
| 70. CR ( 1) C 17  | /453. BD*( 1) C 14 - C 15  | 1.08 10.50 0.096 |
| 70. CR ( 1) C 17  | /456. BD*( 1) C 15 - C 17  | 0.72 10.70 0.079 |
| 70. CR ( 1) C 17  | /458. BD*( 1) C 15 - H 21  | 0.53 10.50 0.067 |
| 71. CR ( 1) C 18  | /309. RY*( 2) C 17         | 0.55 11.28 0.071 |
| 71. CR ( 1) C 18  | /456. BD*( 1) C 15 - C 17  | 0.63 10.84 0.074 |
| 71. CR ( 1) C 18  | /461. BD*( 1) C 18 - O 19  | 0.63 10.51 0.075 |
| 72. CR ( 1) O 19  | /321. RY*( 1) C 18         | 0.80 19.88 0.113 |
| 72. CR ( 1) O 19  | /322. RY*( 2) C 18         | 1.53 20.30 0.158 |
| 72. CR ( 1) O 19  | /324. RY*( 4) C 18         | 0.63 21.26 0.104 |
| 72. CR ( 1) O 19  | /423. RY*( 4) H 33         | 0.56 20.96 0.097 |
| 73. CR ( 1) O 20  | /321. RY*( 1) C 18         | 5.57 19.77 0.298 |
| 73. CR ( 1) O 20  | /459. BD*( 1) C 17 - C 18  | 0.75 19.29 0.109 |
| 74. LP ( 1) O 8   | /165. RY*( 1) C 7          | 1.66 1.51 0.045  |
| 74. LP ( 1) O 8   | /168. RY*( 4) C 7          | 1.61 2.60 0.058  |

|                   |                           |                  |
|-------------------|---------------------------|------------------|
| 74. LP ( 1) O 8   | /204. RY*( 1) C 10        | 1.64 1.65 0.047  |
| 74. LP ( 1) O 8   | /206. RY*( 3) C 10        | 0.79 1.55 0.032  |
| 74. LP ( 1) O 8   | /441. BD*( 1) C 7 - O 9   | 5.70 1.08 0.070  |
| 74. LP ( 1) O 8   | /445. BD*( 1) C 10 - H 27 | 0.63 0.95 0.022  |
| 74. LP ( 1) O 8   | /446. BD*( 1) C 10 - H 28 | 2.37 0.95 0.043  |
| 75. LP ( 2) O 8   | /167. RY*( 3) C 7         | 1.80 1.84 0.054  |
| 75. LP ( 2) O 8   | /205. RY*( 2) C 10        | 1.51 1.51 0.045  |
| 75. LP ( 2) O 8   | /442. BD*( 2) C 7 - O 9   | 38.58 0.31 0.100 |
| 75. LP ( 2) O 8   | /444. BD*( 1) C 10 - H 26 | 5.04 0.70 0.055  |
| 75. LP ( 2) O 8   | /445. BD*( 1) C 10 - H 27 | 5.05 0.70 0.056  |
| 76. LP ( 1) O 9   | /165. RY*( 1) C 7         | 12.34 1.64 0.127 |
| 76. LP ( 1) O 9   | /175. RY*( 11) C 7        | 0.76 4.78 0.054  |
| 76. LP ( 1) O 9   | /433. BD*( 1) C 3 - C 7   | 2.24 1.13 0.045  |
| 76. LP ( 1) O 9   | /440. BD*( 1) C 7 - O 8   | 0.99 0.99 0.029  |
| 77. LP ( 2) O 9   | /166. RY*( 2) C 7         | 1.93 1.70 0.053  |
| 77. LP ( 2) O 9   | /168. RY*( 4) C 7         | 1.71 2.29 0.058  |
| 77. LP ( 2) O 9   | /433. BD*( 1) C 3 - C 7   | 12.43 0.68 0.084 |
| 77. LP ( 2) O 9   | /440. BD*( 1) C 7 - O 8   | 28.85 0.55 0.113 |
| 77. LP ( 2) O 9   | /446. BD*( 1) C 10 - H 28 | 0.80 0.64 0.021  |
| 78. LP ( 1) Se 11 | /152. RY*( 1) C 6         | 1.18 1.76 0.041  |
| 78. LP ( 1) Se 11 | /436. BD*( 1) C 5 - C 6   | 3.35 1.34 0.060  |
| 79. LP ( 2) Se 11 | /434. BD*( 1) C 4 - C 6   | 1.55 0.69 0.030  |
| 79. LP ( 2) Se 11 | /436. BD*( 1) C 5 - C 6   | 1.05 0.87 0.028  |
| 79. LP ( 2) Se 11 | /437. BD*( 2) C 5 - C 6   | 9.55 0.26 0.046  |
| 79. LP ( 2) Se 11 | /448. BD*( 1) C 12 - H 29 | 2.48 0.61 0.036  |
| 79. LP ( 2) Se 11 | /450. BD*( 1) C 12 - H 31 | 4.10 0.61 0.046  |
| 80. LP ( 1) N 13  | / 89. RY*( 3) C 1         | 1.10 1.52 0.040  |
| 80. LP ( 1) N 13  | / 90. RY*( 4) C 1         | 0.73 1.59 0.033  |
| 80. LP ( 1) N 13  | /271. RY*( 3) C 14        | 1.60 1.73 0.051  |
| 80. LP ( 1) N 13  | /416. RY*( 2) H 32        | 0.75 1.95 0.037  |
| 80. LP ( 1) N 13  | /425. BD*( 1) C 1 - C 2   | 3.68 0.71 0.049  |
| 80. LP ( 1) N 13  | /426. BD*( 1) C 1 - C 3   | 2.74 0.89 0.047  |
| 80. LP ( 1) N 13  | /427. BD*( 2) C 1 - C 3   | 17.38 0.30 0.064 |
| 80. LP ( 1) N 13  | /455. BD*( 2) C 14 - O 16 | 50.75 0.26 0.102 |
| 81. LP ( 1) O 16  | /269. RY*( 1) C 14        | 13.16 1.58 0.129 |
| 81. LP ( 1) O 16  | /451. BD*( 1) N 13 - C 14 | 1.20 1.06 0.032  |
| 81. LP ( 1) O 16  | /453. BD*( 1) C 14 - C 15 | 2.17 1.13 0.044  |
| 82. LP ( 2) O 16  | /270. RY*( 2) C 14        | 1.39 1.64 0.044  |
| 82. LP ( 2) O 16  | /272. RY*( 4) C 14        | 1.82 2.67 0.064  |
| 82. LP ( 2) O 16  | /451. BD*( 1) N 13 - C 14 | 23.94 0.62 0.110 |
| 82. LP ( 2) O 16  | /453. BD*( 1) C 14 - C 15 | 14.74 0.68 0.091 |
| 83. LP ( 1) O 19  | /321. RY*( 1) C 18        | 2.39 1.52 0.054  |
| 83. LP ( 1) O 19  | /324. RY*( 4) C 18        | 1.67 2.90 0.062  |
| 83. LP ( 1) O 19  | /422. RY*( 3) H 33        | 1.30 2.29 0.049  |
| 83. LP ( 1) O 19  | /462. BD*( 1) C 18 - O 20 | 5.36 1.14 0.070  |
| 84. LP ( 2) O 19  | /323. RY*( 3) C 18        | 2.03 1.86 0.057  |
| 84. LP ( 2) O 19  | /421. RY*( 2) H 33        | 1.57 1.81 0.050  |
| 84. LP ( 2) O 19  | /463. BD*( 2) C 18 - O 20 | 40.52 0.32 0.103 |
| 85. LP ( 1) O 20  | /321. RY*( 1) C 18        | 13.29 1.61 0.131 |
| 85. LP ( 1) O 20  | /459. BD*( 1) C 17 - C 18 | 2.18 1.14 0.045  |
| 85. LP ( 1) O 20  | /461. BD*( 1) C 18 - O 19 | 0.84 1.00 0.026  |
| 86. LP ( 2) O 20  | /322. RY*( 2) C 18        | 2.68 1.59 0.060  |
| 86. LP ( 2) O 20  | /324. RY*( 4) C 18        | 1.04 2.54 0.048  |
| 86. LP ( 2) O 20  | /459. BD*( 1) C 17 - C 18 | 13.34 0.69 0.087 |
| 86. LP ( 2) O 20  | /461. BD*( 1) C 18 - O 19 | 27.87 0.56 0.112 |

|                          |                            |        |      |       |
|--------------------------|----------------------------|--------|------|-------|
| 427. BD*( 2) C 1 - C 3   | / 91. RY*( 5) C 1          | 1.03   | 1.34 | 0.084 |
| 427. BD*( 2) C 1 - C 3   | /116. RY*( 4) C 3          | 0.95   | 0.75 | 0.060 |
| 427. BD*( 2) C 1 - C 3   | /430. BD*( 2) C 2 - C 4    | 121.26 | 0.01 | 0.072 |
| 427. BD*( 2) C 1 - C 3   | /440. BD*( 1) C 7 - O 8    | 0.83   | 0.25 | 0.028 |
| 427. BD*( 2) C 1 - C 3   | /451. BD*( 1) N 13 - C 14  | 0.71   | 0.33 | 0.031 |
| 427. BD*( 2) C 1 - C 3   | /452. BD*( 1) N 13 - H 32  | 0.97   | 0.31 | 0.038 |
| 430. BD*( 2) C 2 - C 4   | /102. RY*( 3) C 2          | 0.75   | 0.68 | 0.067 |
| 430. BD*( 2) C 2 - C 4   | /130. RY*( 5) C 4          | 0.84   | 1.38 | 0.101 |
| 437. BD*( 2) C 5 - C 6   | /141. RY*( 3) C 5          | 2.62   | 0.54 | 0.094 |
| 437. BD*( 2) C 5 - C 6   | /154. RY*( 3) C 6          | 0.59   | 0.86 | 0.057 |
| 437. BD*( 2) C 5 - C 6   | /447. BD*( 1) Se 11 - C 12 | 1.05   | 0.08 | 0.022 |
| 440. BD*( 1) C 7 - O 8   | /166. RY*( 2) C 7          | 1.61   | 1.15 | 0.163 |
| 440. BD*( 1) C 7 - O 8   | /178. RY*( 1) O 8          | 0.56   | 1.05 | 0.094 |
| 440. BD*( 1) C 7 - O 8   | /432. BD*( 1) C 3 - C 5    | 1.05   | 0.17 | 0.046 |
| 440. BD*( 1) C 7 - O 8   | /433. BD*( 1) C 3 - C 7    | 0.80   | 0.14 | 0.034 |
| 440. BD*( 1) C 7 - O 8   | /441. BD*( 1) C 7 - O 9    | 0.53   | 0.22 | 0.039 |
| 442. BD*( 2) C 7 - O 9   | /167. RY*( 3) C 7          | 1.51   | 1.53 | 0.119 |
| 442. BD*( 2) C 7 - O 9   | /192. RY*( 2) O 9          | 1.10   | 0.98 | 0.082 |
| 442. BD*( 2) C 7 - O 9   | /427. BD*( 2) C 1 - C 3    | 34.70  | 0.05 | 0.068 |
| 455. BD*( 2) C 14 - O 16 | /271. RY*( 3) C 14         | 1.52   | 1.47 | 0.108 |
| 455. BD*( 2) C 14 - O 16 | /275. RY*( 7) C 14         | 1.45   | 1.05 | 0.089 |
| 455. BD*( 2) C 14 - O 16 | /296. RY*( 2) O 16         | 1.41   | 1.02 | 0.087 |
| 455. BD*( 2) C 14 - O 16 | /457. BD*( 2) C 15 - C 17  | 47.23  | 0.03 | 0.076 |
| 463. BD*( 2) C 18 - O 20 | /323. RY*( 3) C 18         | 1.60   | 1.54 | 0.123 |
| 463. BD*( 2) C 18 - O 20 | /329. RY*( 9) C 18         | 1.00   | 0.75 | 0.069 |
| 463. BD*( 2) C 18 - O 20 | /348. RY*( 2) O 20         | 1.01   | 1.02 | 0.080 |
| 463. BD*( 2) C 18 - O 20 | /457. BD*( 2) C 15 - C 17  | 29.43  | 0.04 | 0.075 |

# NATURAL BOND ORBITAL ANALYSIS:

|       |         | Occupancies |           | Lewis Structure |    | Low |     | High |      |      |
|-------|---------|-------------|-----------|-----------------|----|-----|-----|------|------|------|
|       | Occ.    | -----       | -----     |                 |    | occ | occ |      |      |      |
| Cycle | Thresh. | Lewis       | Non-Lewis | CR              | BD | 3C  | LP  | (L)  | (NL) | Dev  |
| ===== |         |             |           |                 |    |     |     |      |      |      |
| 1(1)  | 1.90    | 165.09987   | 6.90013   | 33              | 40 | 0   | 13  | 17   | 11   | 0.81 |
| 2(2)  | 1.90    | 165.09987   | 6.90013   | 33              | 40 | 0   | 13  | 17   | 11   | 0.81 |
| 3(1)  | 1.80    | 166.98957   | 5.01043   | 33              | 37 | 0   | 16  | 4    | 7    | 0.64 |
| 4(2)  | 1.80    | 166.98957   | 5.01043   | 33              | 37 | 0   | 16  | 4    | 7    | 0.64 |
| 5(1)  | 1.70    | 168.60172   | 3.39828   | 33              | 40 | 0   | 13  | 1    | 7    | 0.49 |
| 6(2)  | 1.70    | 169.18413   | 2.81587   | 33              | 40 | 0   | 13  | 1    | 7    | 0.21 |
| 7(3)  | 1.70    | 169.18413   | 2.81587   | 33              | 40 | 0   | 13  | 1    | 7    | 0.21 |
| 8(1)  | 1.60    | 169.18985   | 2.81015   | 33              | 40 | 0   | 13  | 0    | 7    | 0.21 |
| 9(2)  | 1.60    | 169.18985   | 2.81015   | 33              | 40 | 0   | 13  | 0    | 7    | 0.21 |
| 10(1) | 1.50    | 168.68293   | 3.31707   | 33              | 39 | 0   | 14  | 0    | 9    | 0.74 |
| 11(2) | 1.50    | 168.68293   | 3.31707   | 33              | 39 | 0   | 14  | 0    | 9    | 0.74 |
| 12(1) | 1.60    | 169.18985   | 2.81015   | 33              | 40 | 0   | 13  | 0    | 7    | 0.21 |
| ----- |         |             |           |                 |    |     |     |      |      |      |

|               |                             |
|---------------|-----------------------------|
| Core          | 65.98323 ( 99.975% of 66)   |
| Valence Lewis | 103.20662 ( 97.365% of 106) |

|                   |           |                   |  |
|-------------------|-----------|-------------------|--|
| =====             |           | =====             |  |
| Total Lewis       | 169.18985 | ( 98.366% of 172) |  |
| -----             |           |                   |  |
| Valence non-Lewis | 2.50959   | ( 1.459% of 172)  |  |
| Rydberg non-Lewis | 0.30057   | ( 0.175% of 172)  |  |
| =====             |           | =====             |  |
| Total non-Lewis   | 2.81015   | ( 1.634% of 172)  |  |
| -----             |           |                   |  |

## Compound 8

### Second Order Perturbation Theory Analysis of Fock Matrix in NBO Basis

Threshold for printing: 0.50 kcal/mol

| Donor NBO (i)         |                           | Acceptor NBO (j) | E(2)     | E(j)-E(i) | F(i,j) |  |  |  |
|-----------------------|---------------------------|------------------|----------|-----------|--------|--|--|--|
|                       |                           |                  | kcal/mol | a.u.      | a.u.   |  |  |  |
| =====                 |                           |                  |          |           |        |  |  |  |
| =====                 |                           |                  |          |           |        |  |  |  |
| within unit 1         |                           |                  |          |           |        |  |  |  |
| 1. BD ( 1) C 1 - C 2  | /114. RY*( 1) C 3         |                  | 0.79     | 2.49      | 0.040  |  |  |  |
| 1. BD ( 1) C 1 - C 2  | /115. RY*( 2) C 3         |                  | 0.69     | 1.95      | 0.033  |  |  |  |
| 1. BD ( 1) C 1 - C 2  | /128. RY*( 2) C 4         |                  | 2.14     | 1.81      | 0.056  |  |  |  |
| 1. BD ( 1) C 1 - C 2  | /257. RY*( 1) N 13        |                  | 0.89     | 1.52      | 0.033  |  |  |  |
| 1. BD ( 1) C 1 - C 2  | /437. BD*( 1) C 1 - C 3   |                  | 4.23     | 1.27      | 0.066  |  |  |  |
| 1. BD ( 1) C 1 - C 2  | /439. BD*( 1) C 1 - N 13  |                  | 0.58     | 1.03      | 0.022  |  |  |  |
| 1. BD ( 1) C 1 - C 2  | /440. BD*( 1) C 2 - C 4   |                  | 2.94     | 1.31      | 0.056  |  |  |  |
| 1. BD ( 1) C 1 - C 2  | /442. BD*( 1) C 2 - H 21  |                  | 0.62     | 1.10      | 0.023  |  |  |  |
| 1. BD ( 1) C 1 - C 2  | /444. BD*( 1) C 3 - C 7   |                  | 4.39     | 1.07      | 0.062  |  |  |  |
| 1. BD ( 1) C 1 - C 2  | /446. BD*( 1) C 4 - H 22  |                  | 2.83     | 1.10      | 0.050  |  |  |  |
| 1. BD ( 1) C 1 - C 2  | /463. BD*( 1) N 13 - H 30 |                  | 1.59     | 1.00      | 0.036  |  |  |  |
| 2. BD ( 1) C 1 - C 3  | /101. RY*( 1) C 2         |                  | 0.75     | 2.02      | 0.035  |  |  |  |
| 2. BD ( 1) C 1 - C 3  | /140. RY*( 1) C 5         |                  | 0.55     | 1.87      | 0.029  |  |  |  |
| 2. BD ( 1) C 1 - C 3  | /169. RY*( 4) C 7         |                  | 0.58     | 2.78      | 0.036  |  |  |  |
| 2. BD ( 1) C 1 - C 3  | /257. RY*( 1) N 13        |                  | 0.68     | 1.62      | 0.030  |  |  |  |
| 2. BD ( 1) C 1 - C 3  | /436. BD*( 1) C 1 - C 2   |                  | 3.46     | 1.20      | 0.057  |  |  |  |
| 2. BD ( 1) C 1 - C 3  | /439. BD*( 1) C 1 - N 13  |                  | 2.10     | 1.12      | 0.043  |  |  |  |
| 2. BD ( 1) C 1 - C 3  | /442. BD*( 1) C 2 - H 21  |                  | 1.30     | 1.20      | 0.035  |  |  |  |
| 2. BD ( 1) C 1 - C 3  | /443. BD*( 1) C 3 - C 5   |                  | 4.27     | 1.20      | 0.064  |  |  |  |
| 2. BD ( 1) C 1 - C 3  | /444. BD*( 1) C 3 - C 7   |                  | 2.94     | 1.17      | 0.053  |  |  |  |
| 2. BD ( 1) C 1 - C 3  | /449. BD*( 1) C 5 - H 23  |                  | 1.32     | 1.20      | 0.036  |  |  |  |
| 2. BD ( 1) C 1 - C 3  | /452. BD*( 1) C 7 - O 9   |                  | 1.16     | 1.25      | 0.034  |  |  |  |
| 2. BD ( 1) C 1 - C 3  | /462. BD*( 1) N 13 - C 14 |                  | 2.09     | 1.12      | 0.044  |  |  |  |
| 3. BD ( 2) C 1 - C 3  | /103. RY*( 3) C 2         |                  | 1.09     | 1.02      | 0.032  |  |  |  |
| 3. BD ( 2) C 1 - C 3  | /142. RY*( 3) C 5         |                  | 0.85     | 0.86      | 0.026  |  |  |  |
| 3. BD ( 2) C 1 - C 3  | /170. RY*( 5) C 7         |                  | 0.62     | 1.48      | 0.029  |  |  |  |
| 3. BD ( 2) C 1 - C 3  | /441. BD*( 2) C 2 - C 4   |                  | 10.73    | 0.33      | 0.054  |  |  |  |
| 3. BD ( 2) C 1 - C 3  | /448. BD*( 2) C 5 - C 6   |                  | 13.63    | 0.32      | 0.059  |  |  |  |
| 3. BD ( 2) C 1 - C 3  | /451. BD*( 1) C 7 - O 8   |                  | 1.09     | 0.56      | 0.023  |  |  |  |
| 3. BD ( 2) C 1 - C 3  | /453. BD*( 2) C 7 - O 9   |                  | 19.15    | 0.27      | 0.064  |  |  |  |
| 3. BD ( 2) C 1 - C 3  | /462. BD*( 1) N 13 - C 14 |                  | 1.53     | 0.65      | 0.029  |  |  |  |
| 3. BD ( 2) C 1 - C 3  | /463. BD*( 1) N 13 - H 30 |                  | 1.52     | 0.63      | 0.029  |  |  |  |
| 4. BD ( 1) C 1 - N 13 | /101. RY*( 1) C 2         |                  | 0.53     | 2.05      | 0.030  |  |  |  |

|                       |                           |       |      |       |
|-----------------------|---------------------------|-------|------|-------|
| 4. BD ( 1) C 1 - N 13 | /114. RY*( 1) C 3         | 1.35  | 2.62 | 0.053 |
| 4. BD ( 1) C 1 - N 13 | /270. RY*( 1) C 14        | 1.72  | 1.60 | 0.047 |
| 4. BD ( 1) C 1 - N 13 | /436. BD*( 1) C 1 - C 2   | 0.64  | 1.23 | 0.025 |
| 4. BD ( 1) C 1 - N 13 | /437. BD*( 1) C 1 - C 3   | 2.16  | 1.41 | 0.049 |
| 4. BD ( 1) C 1 - N 13 | /440. BD*( 1) C 2 - C 4   | 0.87  | 1.44 | 0.032 |
| 4. BD ( 1) C 1 - N 13 | /443. BD*( 1) C 3 - C 5   | 2.71  | 1.23 | 0.052 |
| 4. BD ( 1) C 1 - N 13 | /462. BD*( 1) N 13 - C 14 | 0.95  | 1.16 | 0.030 |
| 4. BD ( 1) C 1 - N 13 | /464. BD*( 1) C 14 - C 15 | 1.78  | 1.18 | 0.041 |
| 5. BD ( 1) C 2 - C 4  | / 88. RY*( 1) C 1         | 1.41  | 1.93 | 0.047 |
| 5. BD ( 1) C 2 - C 4  | / 90. RY*( 3) C 1         | 0.94  | 2.02 | 0.039 |
| 5. BD ( 1) C 2 - C 4  | /153. RY*( 1) C 6         | 1.02  | 1.81 | 0.039 |
| 5. BD ( 1) C 2 - C 4  | /436. BD*( 1) C 1 - C 2   | 2.73  | 1.19 | 0.051 |
| 5. BD ( 1) C 2 - C 4  | /439. BD*( 1) C 1 - N 13  | 2.79  | 1.12 | 0.050 |
| 5. BD ( 1) C 2 - C 4  | /442. BD*( 1) C 2 - H 21  | 1.68  | 1.20 | 0.040 |
| 5. BD ( 1) C 2 - C 4  | /445. BD*( 1) C 4 - C 6   | 3.65  | 1.21 | 0.060 |
| 5. BD ( 1) C 2 - C 4  | /446. BD*( 1) C 4 - H 22  | 1.58  | 1.19 | 0.039 |
| 5. BD ( 1) C 2 - C 4  | /450. BD*( 1) C 6 -Se 11  | 3.11  | 0.88 | 0.047 |
| 6. BD ( 2) C 2 - C 4  | / 93. RY*( 6) C 1         | 0.62  | 1.82 | 0.032 |
| 6. BD ( 2) C 2 - C 4  | /438. BD*( 2) C 1 - C 3   | 14.34 | 0.31 | 0.061 |
| 6. BD ( 2) C 2 - C 4  | /448. BD*( 2) C 5 - C 6   | 12.91 | 0.31 | 0.057 |
| 7. BD ( 1) C 2 - H 21 | / 88. RY*( 1) C 1         | 0.63  | 1.70 | 0.029 |
| 7. BD ( 1) C 2 - H 21 | / 89. RY*( 2) C 1         | 0.89  | 1.83 | 0.036 |
| 7. BD ( 1) C 2 - H 21 | /127. RY*( 1) C 4         | 1.44  | 1.68 | 0.044 |
| 7. BD ( 1) C 2 - H 21 | /437. BD*( 1) C 1 - C 3   | 3.22  | 1.14 | 0.054 |
| 7. BD ( 1) C 2 - H 21 | /439. BD*( 1) C 1 - N 13  | 0.60  | 0.89 | 0.021 |
| 7. BD ( 1) C 2 - H 21 | /440. BD*( 1) C 2 - C 4   | 1.59  | 1.18 | 0.039 |
| 7. BD ( 1) C 2 - H 21 | /445. BD*( 1) C 4 - C 6   | 5.68  | 0.98 | 0.067 |
| 7. BD ( 1) C 2 - H 21 | /446. BD*( 1) C 4 - H 22  | 0.94  | 0.96 | 0.027 |
| 8. BD ( 1) C 3 - C 5  | / 89. RY*( 2) C 1         | 1.21  | 1.95 | 0.044 |
| 8. BD ( 1) C 3 - C 5  | /154. RY*( 2) C 6         | 1.34  | 1.47 | 0.040 |
| 8. BD ( 1) C 3 - C 5  | /166. RY*( 1) C 7         | 1.00  | 1.58 | 0.036 |
| 8. BD ( 1) C 3 - C 5  | /437. BD*( 1) C 1 - C 3   | 4.59  | 1.26 | 0.068 |
| 8. BD ( 1) C 3 - C 5  | /439. BD*( 1) C 1 - N 13  | 5.33  | 1.02 | 0.066 |
| 8. BD ( 1) C 3 - C 5  | /444. BD*( 1) C 3 - C 7   | 1.67  | 1.06 | 0.038 |
| 8. BD ( 1) C 3 - C 5  | /447. BD*( 1) C 5 - C 6   | 3.92  | 1.29 | 0.064 |
| 8. BD ( 1) C 3 - C 5  | /449. BD*( 1) C 5 - H 23  | 0.63  | 1.10 | 0.024 |
| 8. BD ( 1) C 3 - C 5  | /450. BD*( 1) C 6 -Se 11  | 5.51  | 0.78 | 0.059 |
| 8. BD ( 1) C 3 - C 5  | /451. BD*( 1) C 7 - O 8   | 2.85  | 0.92 | 0.046 |
| 8. BD ( 1) C 3 - C 5  | /453. BD*( 2) C 7 - O 9   | 0.54  | 0.63 | 0.017 |
| 9. BD ( 1) C 3 - C 7  | / 88. RY*( 1) C 1         | 0.84  | 1.87 | 0.036 |
| 9. BD ( 1) C 3 - C 7  | / 89. RY*( 2) C 1         | 1.06  | 1.99 | 0.041 |
| 9. BD ( 1) C 3 - C 7  | /140. RY*( 1) C 5         | 1.01  | 1.80 | 0.038 |
| 9. BD ( 1) C 3 - C 7  | /192. RY*( 1) O 9         | 0.72  | 1.80 | 0.032 |
| 9. BD ( 1) C 3 - C 7  | /436. BD*( 1) C 1 - C 2   | 3.77  | 1.13 | 0.058 |
| 9. BD ( 1) C 3 - C 7  | /437. BD*( 1) C 1 - C 3   | 3.98  | 1.30 | 0.064 |
| 9. BD ( 1) C 3 - C 7  | /443. BD*( 1) C 3 - C 5   | 1.28  | 1.13 | 0.034 |
| 9. BD ( 1) C 3 - C 7  | /447. BD*( 1) C 5 - C 6   | 1.46  | 1.33 | 0.039 |
| 9. BD ( 1) C 3 - C 7  | /452. BD*( 1) C 7 - O 9   | 0.95  | 1.19 | 0.030 |
| 9. BD ( 1) C 3 - C 7  | /454. BD*( 1) O 8 - C 10  | 2.86  | 0.95 | 0.047 |
| 10. BD ( 1) C 4 - C 6 | /101. RY*( 1) C 2         | 0.75  | 1.93 | 0.034 |
| 10. BD ( 1) C 4 - C 6 | /102. RY*( 2) C 2         | 1.57  | 2.00 | 0.050 |
| 10. BD ( 1) C 4 - C 6 | /140. RY*( 1) C 5         | 0.93  | 1.78 | 0.037 |
| 10. BD ( 1) C 4 - C 6 | /141. RY*( 2) C 5         | 0.84  | 1.61 | 0.033 |
| 10. BD ( 1) C 4 - C 6 | /440. BD*( 1) C 2 - C 4   | 3.20  | 1.32 | 0.058 |
| 10. BD ( 1) C 4 - C 6 | /442. BD*( 1) C 2 - H 21  | 2.67  | 1.12 | 0.049 |

|                          |                            |                  |
|--------------------------|----------------------------|------------------|
| 10. BD ( 1) C 4 - C 6    | /446. BD*( 1) C 4 - H 22   | 0.87 1.11 0.028  |
| 10. BD ( 1) C 4 - C 6    | /447. BD*( 1) C 5 - C 6    | 3.50 1.32 0.061  |
| 10. BD ( 1) C 4 - C 6    | /449. BD*( 1) C 5 - H 23   | 3.42 1.12 0.055  |
| 11. BD ( 1) C 4 - H 22   | /101. RY*( 1) C 2          | 1.53 1.79 0.047  |
| 11. BD ( 1) C 4 - H 22   | /153. RY*( 1) C 6          | 1.15 1.59 0.038  |
| 11. BD ( 1) C 4 - H 22   | /436. BD*( 1) C 1 - C 2    | 5.67 0.97 0.066  |
| 11. BD ( 1) C 4 - H 22   | /440. BD*( 1) C 2 - C 4    | 1.49 1.18 0.038  |
| 11. BD ( 1) C 4 - H 22   | /442. BD*( 1) C 2 - H 21   | 0.96 0.97 0.027  |
| 11. BD ( 1) C 4 - H 22   | /447. BD*( 1) C 5 - C 6    | 3.19 1.17 0.055  |
| 12. BD ( 1) C 5 - C 6    | /114. RY*( 1) C 3          | 1.45 2.60 0.055  |
| 12. BD ( 1) C 5 - C 6    | /115. RY*( 2) C 3          | 0.69 2.06 0.034  |
| 12. BD ( 1) C 5 - C 6    | /127. RY*( 1) C 4          | 1.05 1.92 0.040  |
| 12. BD ( 1) C 5 - C 6    | /443. BD*( 1) C 3 - C 5    | 3.31 1.21 0.057  |
| 12. BD ( 1) C 5 - C 6    | /444. BD*( 1) C 3 - C 7    | 2.03 1.18 0.044  |
| 12. BD ( 1) C 5 - C 6    | /445. BD*( 1) C 4 - C 6    | 3.14 1.23 0.056  |
| 12. BD ( 1) C 5 - C 6    | /446. BD*( 1) C 4 - H 22   | 1.65 1.21 0.040  |
| 12. BD ( 1) C 5 - C 6    | /449. BD*( 1) C 5 - H 23   | 2.31 1.22 0.047  |
| 13. BD ( 2) C 5 - C 6    | /117. RY*( 4) C 3          | 0.63 1.05 0.024  |
| 13. BD ( 2) C 5 - C 6    | /129. RY*( 3) C 4          | 1.70 1.12 0.041  |
| 13. BD ( 2) C 5 - C 6    | /218. RY*( 1) Se 11        | 1.00 0.78 0.026  |
| 13. BD ( 2) C 5 - C 6    | /438. BD*( 2) C 1 - C 3    | 11.79 0.31 0.056 |
| 13. BD ( 2) C 5 - C 6    | /441. BD*( 2) C 2 - C 4    | 13.15 0.32 0.059 |
| 13. BD ( 2) C 5 - C 6    | /458. BD*( 1) Se 11 - C 12 | 0.51 0.39 0.013  |
| 14. BD ( 1) C 5 - H 23   | /114. RY*( 1) C 3          | 1.79 2.35 0.058  |
| 14. BD ( 1) C 5 - H 23   | /153. RY*( 1) C 6          | 1.74 1.58 0.047  |
| 14. BD ( 1) C 5 - H 23   | /437. BD*( 1) C 1 - C 3    | 3.07 1.14 0.053  |
| 14. BD ( 1) C 5 - H 23   | /445. BD*( 1) C 4 - C 6    | 6.00 0.98 0.069  |
| 14. BD ( 1) C 5 - H 23   | /447. BD*( 1) C 5 - C 6    | 2.16 1.17 0.045  |
| 15. BD ( 1) C 6 - Se 11  | /127. RY*( 1) C 4          | 1.99 1.74 0.053  |
| 15. BD ( 1) C 6 - Se 11  | /140. RY*( 1) C 5          | 1.61 1.70 0.047  |
| 15. BD ( 1) C 6 - Se 11  | /244. RY*( 1) C 12         | 0.60 1.58 0.028  |
| 15. BD ( 1) C 6 - Se 11  | /440. BD*( 1) C 2 - C 4    | 2.65 1.24 0.051  |
| 15. BD ( 1) C 6 - Se 11  | /443. BD*( 1) C 3 - C 5    | 5.23 1.03 0.066  |
| 15. BD ( 1) C 6 - Se 11  | /447. BD*( 1) C 5 - C 6    | 0.95 1.23 0.031  |
| 15. BD ( 1) C 6 - Se 11  | /449. BD*( 1) C 5 - H 23   | 0.94 1.04 0.028  |
| 15. BD ( 1) C 6 - Se 11  | /458. BD*( 1) Se 11 - C 12 | 0.51 0.69 0.017  |
| 15. BD ( 1) C 6 - Se 11  | /460. BD*( 1) C 12 - H 28  | 0.94 0.97 0.027  |
| 16. BD ( 1) C 7 - O 8    | /115. RY*( 2) C 3          | 1.04 2.17 0.042  |
| 16. BD ( 1) C 7 - O 8    | /207. RY*( 3) C 10         | 1.04 1.84 0.039  |
| 16. BD ( 1) C 7 - O 8    | /443. BD*( 1) C 3 - C 5    | 1.27 1.32 0.037  |
| 16. BD ( 1) C 7 - O 8    | /457. BD*( 1) C 10 - H 26  | 0.66 1.24 0.025  |
| 17. BD ( 1) C 7 - O 9    | /115. RY*( 2) C 3          | 1.31 2.30 0.049  |
| 17. BD ( 1) C 7 - O 9    | /166. RY*( 1) C 7          | 1.64 1.93 0.050  |
| 17. BD ( 1) C 7 - O 9    | /437. BD*( 1) C 1 - C 3    | 1.53 1.62 0.045  |
| 17. BD ( 1) C 7 - O 9    | /444. BD*( 1) C 3 - C 7    | 1.77 1.42 0.045  |
| 18. BD ( 2) C 7 - O 9    | /438. BD*( 2) C 1 - C 3    | 4.52 0.40 0.041  |
| 18. BD ( 2) C 7 - O 9    | /453. BD*( 2) C 7 - O 9    | 0.65 0.36 0.014  |
| 19. BD ( 1) O 8 - C 10   | /166. RY*( 1) C 7          | 1.27 1.77 0.042  |
| 19. BD ( 1) O 8 - C 10   | /444. BD*( 1) C 3 - C 7    | 2.60 1.26 0.052  |
| 20. BD ( 1) C 10 - H 24  | /180. RY*( 2) O 8          | 0.52 1.51 0.025  |
| 21. BD ( 1) C 10 - H 25  | /180. RY*( 2) O 8          | 0.57 1.51 0.026  |
| 21. BD ( 1) C 10 - H 25  | /454. BD*( 1) O 8 - C 10   | 0.58 0.79 0.019  |
| 22. BD ( 1) C 10 - H 26  | /451. BD*( 1) C 7 - O 8    | 3.93 0.80 0.051  |
| 23. BD ( 1) Se 11 - C 12 | /153. RY*( 1) C 6          | 0.64 1.63 0.029  |
| 23. BD ( 1) Se 11 - C 12 | /445. BD*( 1) C 4 - C 6    | 1.77 1.03 0.038  |

|                         |                           |                 |
|-------------------------|---------------------------|-----------------|
| 23. BD ( 1)Se 11 - C 12 | /448. BD*( 2) C 5 - C 6   | 0.85 0.60 0.021 |
| 25. BD ( 1) C 12 - H 28 | /450. BD*( 1) C 6 -Se 11  | 1.00 0.65 0.023 |
| 27. BD ( 1) N 13 - C 14 | / 88. RY*( 1) C 1         | 0.76 1.98 0.035 |
| 27. BD ( 1) N 13 - C 14 | / 89. RY*( 2) C 1         | 0.77 2.10 0.036 |
| 27. BD ( 1) N 13 - C 14 | /284. RY*( 2) C 15        | 0.87 1.57 0.033 |
| 27. BD ( 1) N 13 - C 14 | /437. BD*( 1) C 1 - C 3   | 1.60 1.41 0.043 |
| 27. BD ( 1) N 13 - C 14 | /439. BD*( 1) C 1 - N 13  | 1.12 1.17 0.032 |
| 27. BD ( 1) N 13 - C 14 | /467. BD*( 1) C 15 - C 17 | 1.06 1.15 0.031 |
| 28. BD ( 1) N 13 - H 30 | / 88. RY*( 1) C 1         | 1.09 1.84 0.040 |
| 28. BD ( 1) N 13 - H 30 | /271. RY*( 2) C 14        | 0.80 2.01 0.036 |
| 28. BD ( 1) N 13 - H 30 | /273. RY*( 4) C 14        | 0.91 2.92 0.046 |
| 28. BD ( 1) N 13 - H 30 | /436. BD*( 1) C 1 - C 2   | 2.09 1.10 0.043 |
| 28. BD ( 1) N 13 - H 30 | /438. BD*( 2) C 1 - C 3   | 1.57 0.68 0.032 |
| 28. BD ( 1) N 13 - H 30 | /465. BD*( 1) C 14 - O 16 | 3.04 1.17 0.053 |
| 29. BD ( 1) C 14 - C 15 | /258. RY*( 2) N 13        | 1.56 1.74 0.047 |
| 29. BD ( 1) C 14 - C 15 | /296. RY*( 1) O 16        | 0.58 1.85 0.029 |
| 29. BD ( 1) C 14 - C 15 | /310. RY*( 2) C 17        | 1.03 1.45 0.035 |
| 29. BD ( 1) C 14 - C 15 | /439. BD*( 1) C 1 - N 13  | 3.05 1.04 0.050 |
| 29. BD ( 1) C 14 - C 15 | /465. BD*( 1) C 14 - O 16 | 0.75 1.19 0.027 |
| 29. BD ( 1) C 14 - C 15 | /467. BD*( 1) C 15 - C 17 | 0.75 1.03 0.025 |
| 29. BD ( 1) C 14 - C 15 | /468. BD*( 1) C 15 - H 31 | 0.51 1.04 0.020 |
| 29. BD ( 1) C 14 - C 15 | /469. BD*( 1) C 15 - H 32 | 0.52 1.03 0.021 |
| 29. BD ( 1) C 14 - C 15 | /470. BD*( 1) C 17 - C 18 | 1.67 1.06 0.038 |
| 30. BD ( 1) C 14 - O 16 | /270. RY*( 1) C 14        | 1.67 1.81 0.049 |
| 30. BD ( 1) C 14 - O 16 | /463. BD*( 1) N 13 - H 30 | 1.20 1.35 0.036 |
| 30. BD ( 1) C 14 - O 16 | /464. BD*( 1) C 14 - C 15 | 1.23 1.39 0.037 |
| 31. BD ( 2) C 14 - O 16 | /466. BD*( 2) C 14 - O 16 | 0.68 0.35 0.015 |
| 31. BD ( 2) C 14 - O 16 | /468. BD*( 1) C 15 - H 31 | 1.73 0.73 0.032 |
| 31. BD ( 2) C 14 - O 16 | /469. BD*( 1) C 15 - H 32 | 1.83 0.72 0.032 |
| 32. BD ( 1) C 15 - C 17 | /270. RY*( 1) C 14        | 1.36 1.44 0.040 |
| 32. BD ( 1) C 15 - C 17 | /322. RY*( 1) C 18        | 0.55 1.40 0.025 |
| 32. BD ( 1) C 15 - C 17 | /325. RY*( 4) C 18        | 1.00 1.74 0.038 |
| 32. BD ( 1) C 15 - C 17 | /462. BD*( 1) N 13 - C 14 | 3.85 1.00 0.056 |
| 32. BD ( 1) C 15 - C 17 | /464. BD*( 1) C 14 - C 15 | 1.02 1.02 0.029 |
| 32. BD ( 1) C 15 - C 17 | /468. BD*( 1) C 15 - H 31 | 0.54 1.00 0.021 |
| 32. BD ( 1) C 15 - C 17 | /470. BD*( 1) C 17 - C 18 | 0.69 1.02 0.024 |
| 32. BD ( 1) C 15 - C 17 | /472. BD*( 1) C 17 - H 34 | 0.54 1.01 0.021 |
| 32. BD ( 1) C 15 - C 17 | /473. BD*( 1) C 18 - O 19 | 1.92 0.92 0.038 |
| 32. BD ( 1) C 15 - C 17 | /475. BD*( 2) C 18 - O 20 | 2.72 0.64 0.039 |
| 33. BD ( 1) C 15 - H 31 | /309. RY*( 1) C 17        | 0.58 1.28 0.025 |
| 33. BD ( 1) C 15 - H 31 | /465. BD*( 1) C 14 - O 16 | 1.86 1.03 0.039 |
| 33. BD ( 1) C 15 - H 31 | /466. BD*( 2) C 14 - O 16 | 5.68 0.50 0.051 |
| 33. BD ( 1) C 15 - H 31 | /471. BD*( 1) C 17 - H 33 | 2.63 0.89 0.043 |
| 34. BD ( 1) C 15 - H 32 | /309. RY*( 1) C 17        | 0.53 1.29 0.024 |
| 34. BD ( 1) C 15 - H 32 | /465. BD*( 1) C 14 - O 16 | 2.11 1.03 0.042 |
| 34. BD ( 1) C 15 - H 32 | /466. BD*( 2) C 14 - O 16 | 4.65 0.51 0.046 |
| 34. BD ( 1) C 15 - H 32 | /472. BD*( 1) C 17 - H 34 | 2.68 0.89 0.044 |
| 35. BD ( 1) C 17 - C 18 | /283. RY*( 1) C 15        | 1.19 1.46 0.037 |
| 35. BD ( 1) C 17 - C 18 | /348. RY*( 1) O 20        | 1.16 1.70 0.040 |
| 35. BD ( 1) C 17 - C 18 | /464. BD*( 1) C 14 - C 15 | 2.15 1.07 0.043 |
| 35. BD ( 1) C 17 - C 18 | /467. BD*( 1) C 15 - C 17 | 0.75 1.03 0.025 |
| 35. BD ( 1) C 17 - C 18 | /474. BD*( 1) C 18 - O 20 | 0.57 1.17 0.023 |
| 35. BD ( 1) C 17 - C 18 | /476. BD*( 1) O 19 - H 35 | 1.85 0.98 0.038 |
| 36. BD ( 1) C 17 - H 33 | /468. BD*( 1) C 15 - H 31 | 2.94 0.87 0.045 |
| 36. BD ( 1) C 17 - H 33 | /473. BD*( 1) C 18 - O 19 | 0.90 0.79 0.024 |

|                         |                           |      |       |       |
|-------------------------|---------------------------|------|-------|-------|
| 36. BD ( 1) C 17 - H 33 | /474. BD*( 1) C 18 - O 20 | 4.46 | 0.99  | 0.060 |
| 37. BD ( 1) C 17 - H 34 | /285. RY*( 3) C 15        | 0.51 | 1.32  | 0.023 |
| 37. BD ( 1) C 17 - H 34 | /469. BD*( 1) C 15 - H 32 | 2.83 | 0.86  | 0.044 |
| 37. BD ( 1) C 17 - H 34 | /473. BD*( 1) C 18 - O 19 | 2.65 | 0.79  | 0.042 |
| 37. BD ( 1) C 17 - H 34 | /475. BD*( 2) C 18 - O 20 | 5.19 | 0.51  | 0.048 |
| 38. BD ( 1) C 18 - O 19 | /309. RY*( 1) C 17        | 0.64 | 1.68  | 0.029 |
| 39. BD ( 1) C 18 - O 20 | /309. RY*( 1) C 17        | 0.75 | 1.75  | 0.032 |
| 39. BD ( 1) C 18 - O 20 | /322. RY*( 1) C 18        | 1.62 | 1.75  | 0.048 |
| 39. BD ( 1) C 18 - O 20 | /470. BD*( 1) C 17 - C 18 | 1.09 | 1.37  | 0.035 |
| 39. BD ( 1) C 18 - O 20 | /471. BD*( 1) C 17 - H 33 | 0.66 | 1.36  | 0.027 |
| 40. BD ( 2) C 18 - O 20 | /467. BD*( 1) C 15 - C 17 | 1.17 | 0.75  | 0.026 |
| 40. BD ( 2) C 18 - O 20 | /472. BD*( 1) C 17 - H 34 | 1.10 | 0.77  | 0.026 |
| 40. BD ( 2) C 18 - O 20 | /475. BD*( 2) C 18 - O 20 | 0.81 | 0.40  | 0.017 |
| 41. BD ( 1) O 19 - H 35 | /322. RY*( 1) C 18        | 0.97 | 1.49  | 0.034 |
| 41. BD ( 1) O 19 - H 35 | /323. RY*( 2) C 18        | 1.15 | 2.01  | 0.043 |
| 41. BD ( 1) O 19 - H 35 | /470. BD*( 1) C 17 - C 18 | 3.73 | 1.11  | 0.058 |
| 41. BD ( 1) O 19 - H 35 | /474. BD*( 1) C 18 - O 20 | 1.22 | 1.22  | 0.035 |
| 42. CR ( 1) C 1         | /102. RY*( 2) C 2         | 0.96 | 11.45 | 0.093 |
| 42. CR ( 1) C 1         | /114. RY*( 1) C 3         | 0.53 | 11.95 | 0.071 |
| 42. CR ( 1) C 1         | /115. RY*( 2) C 3         | 1.69 | 11.41 | 0.124 |
| 42. CR ( 1) C 1         | /437. BD*( 1) C 1 - C 3   | 1.36 | 10.73 | 0.109 |
| 42. CR ( 1) C 1         | /440. BD*( 1) C 2 - C 4   | 0.57 | 10.77 | 0.070 |
| 42. CR ( 1) C 1         | /443. BD*( 1) C 3 - C 5   | 1.03 | 10.56 | 0.094 |
| 42. CR ( 1) C 1         | /444. BD*( 1) C 3 - C 7   | 1.11 | 10.53 | 0.098 |
| 42. CR ( 1) C 1         | /462. BD*( 1) N 13 - C 14 | 1.04 | 10.48 | 0.095 |
| 43. CR ( 1) C 2         | / 89. RY*( 2) C 1         | 1.36 | 11.36 | 0.111 |
| 43. CR ( 1) C 2         | /127. RY*( 1) C 4         | 0.60 | 11.21 | 0.073 |
| 43. CR ( 1) C 2         | /128. RY*( 2) C 4         | 1.74 | 11.21 | 0.125 |
| 43. CR ( 1) C 2         | /437. BD*( 1) C 1 - C 3   | 0.83 | 10.67 | 0.085 |
| 43. CR ( 1) C 2         | /439. BD*( 1) C 1 - N 13  | 0.54 | 10.42 | 0.067 |
| 43. CR ( 1) C 2         | /440. BD*( 1) C 2 - C 4   | 0.83 | 10.70 | 0.084 |
| 43. CR ( 1) C 2         | /445. BD*( 1) C 4 - C 6   | 1.31 | 10.51 | 0.105 |
| 44. CR ( 1) C 3         | / 88. RY*( 1) C 1         | 1.13 | 11.25 | 0.101 |
| 44. CR ( 1) C 3         | / 90. RY*( 3) C 1         | 1.03 | 11.34 | 0.097 |
| 44. CR ( 1) C 3         | /141. RY*( 2) C 5         | 0.69 | 11.02 | 0.078 |
| 44. CR ( 1) C 3         | /167. RY*( 2) C 7         | 0.60 | 11.50 | 0.074 |
| 44. CR ( 1) C 3         | /172. RY*( 7) C 7         | 0.83 | 11.19 | 0.086 |
| 44. CR ( 1) C 3         | /436. BD*( 1) C 1 - C 2   | 1.09 | 10.52 | 0.096 |
| 44. CR ( 1) C 3         | /437. BD*( 1) C 1 - C 3   | 1.24 | 10.69 | 0.104 |
| 44. CR ( 1) C 3         | /439. BD*( 1) C 1 - N 13  | 1.02 | 10.45 | 0.093 |
| 44. CR ( 1) C 3         | /447. BD*( 1) C 5 - C 6   | 0.72 | 10.72 | 0.079 |
| 44. CR ( 1) C 3         | /451. BD*( 1) C 7 - O 8   | 0.61 | 10.35 | 0.073 |
| 45. CR ( 1) C 4         | /102. RY*( 2) C 2         | 1.30 | 11.38 | 0.109 |
| 45. CR ( 1) C 4         | /104. RY*( 4) C 2         | 0.69 | 11.04 | 0.078 |
| 45. CR ( 1) C 4         | /154. RY*( 2) C 6         | 1.15 | 10.87 | 0.100 |
| 45. CR ( 1) C 4         | /156. RY*( 4) C 6         | 0.75 | 11.11 | 0.082 |
| 45. CR ( 1) C 4         | /436. BD*( 1) C 1 - C 2   | 1.20 | 10.49 | 0.101 |
| 45. CR ( 1) C 4         | /440. BD*( 1) C 2 - C 4   | 0.67 | 10.70 | 0.076 |
| 45. CR ( 1) C 4         | /447. BD*( 1) C 5 - C 6   | 0.82 | 10.70 | 0.084 |
| 45. CR ( 1) C 4         | /450. BD*( 1) C 6 -Se 11  | 0.82 | 10.18 | 0.082 |
| 46. CR ( 1) C 5         | /115. RY*( 2) C 3         | 0.78 | 11.34 | 0.084 |
| 46. CR ( 1) C 5         | /153. RY*( 1) C 6         | 0.98 | 11.11 | 0.093 |
| 46. CR ( 1) C 5         | /154. RY*( 2) C 6         | 1.96 | 10.87 | 0.130 |
| 46. CR ( 1) C 5         | /155. RY*( 3) C 6         | 0.64 | 10.94 | 0.074 |
| 46. CR ( 1) C 5         | /437. BD*( 1) C 1 - C 3   | 0.76 | 10.67 | 0.081 |

|                   |                            |                  |
|-------------------|----------------------------|------------------|
| 46. CR ( 1) C 5   | /444. BD*( 1) C 3 - C 7    | 0.66 10.46 0.075 |
| 46. CR ( 1) C 5   | /445. BD*( 1) C 4 - C 6    | 1.23 10.51 0.102 |
| 46. CR ( 1) C 5   | /447. BD*( 1) C 5 - C 6    | 1.20 10.70 0.102 |
| 46. CR ( 1) C 5   | /450. BD*( 1) C 6 -Se 11   | 1.25 10.18 0.101 |
| 47. CR ( 1) C 6   | /128. RY*( 2) C 4          | 1.03 11.25 0.096 |
| 47. CR ( 1) C 6   | /141. RY*( 2) C 5          | 2.17 11.03 0.138 |
| 47. CR ( 1) C 6   | /143. RY*( 4) C 5          | 0.63 11.15 0.075 |
| 47. CR ( 1) C 6   | /440. BD*( 1) C 2 - C 4    | 0.63 10.74 0.074 |
| 47. CR ( 1) C 6   | /443. BD*( 1) C 3 - C 5    | 1.17 10.53 0.100 |
| 47. CR ( 1) C 6   | /447. BD*( 1) C 5 - C 6    | 1.22 10.73 0.103 |
| 47. CR ( 1) C 6   | /449. BD*( 1) C 5 - H 23   | 0.56 10.54 0.069 |
| 47. CR ( 1) C 6   | /450. BD*( 1) C 6 -Se 11   | 1.34 10.22 0.105 |
| 48. CR ( 1) C 7   | /114. RY*( 1) C 3          | 1.19 12.04 0.107 |
| 48. CR ( 1) C 7   | /437. BD*( 1) C 1 - C 3    | 0.87 10.83 0.087 |
| 48. CR ( 1) C 7   | /443. BD*( 1) C 3 - C 5    | 0.54 10.66 0.068 |
| 48. CR ( 1) C 7   | /444. BD*( 1) C 3 - C 7    | 0.56 10.63 0.070 |
| 48. CR ( 1) C 7   | /451. BD*( 1) C 7 - O 8    | 0.67 10.49 0.077 |
| 48. CR ( 1) C 7   | /454. BD*( 1) O 8 - C 10   | 1.11 10.48 0.097 |
| 49. CR ( 1) O 8   | /166. RY*( 1) C 7          | 1.01 19.92 0.127 |
| 49. CR ( 1) O 8   | /167. RY*( 2) C 7          | 1.12 20.42 0.135 |
| 49. CR ( 1) O 8   | /207. RY*( 3) C 10         | 0.87 19.95 0.118 |
| 50. CR ( 1) O 9   | /166. RY*( 1) C 7          | 5.28 19.80 0.290 |
| 50. CR ( 1) O 9   | /444. BD*( 1) C 3 - C 7    | 0.78 19.29 0.111 |
| 51. CR ( 1) C 10  | /387. RY*( 2) H 26         | 0.55 12.16 0.073 |
| 51. CR ( 1) C 10  | /451. BD*( 1) C 7 - O 8    | 1.10 10.40 0.098 |
| 51. CR ( 1) C 10  | /454. BD*( 1) O 8 - C 10   | 1.48 10.39 0.111 |
| 54. CR ( 3) Se 11 | /153. RY*( 1) C 6          | 1.00 11.34 0.095 |
| 54. CR ( 3) Se 11 | /247. RY*( 4) C 12         | 0.60 11.19 0.073 |
| 54. CR ( 3) Se 11 | /445. BD*( 1) C 4 - C 6    | 0.75 10.74 0.081 |
| 54. CR ( 3) Se 11 | /447. BD*( 1) C 5 - C 6    | 1.24 10.92 0.104 |
| 66. CR ( 1) C 12  | /458. BD*( 1) Se 11 - C 12 | 1.46 10.19 0.109 |
| 67. CR ( 1) N 13  | / 88. RY*( 1) C 1          | 1.10 15.39 0.116 |
| 67. CR ( 1) N 13  | / 89. RY*( 2) C 1          | 0.55 15.52 0.082 |
| 67. CR ( 1) N 13  | /271. RY*( 2) C 14         | 1.51 15.56 0.137 |
| 67. CR ( 1) N 13  | /275. RY*( 6) C 14         | 0.68 15.24 0.091 |
| 67. CR ( 1) N 13  | /408. RY*( 3) H 30         | 0.51 16.46 0.082 |
| 67. CR ( 1) N 13  | /437. BD*( 1) C 1 - C 3    | 0.59 14.83 0.084 |
| 68. CR ( 1) C 14  | /283. RY*( 1) C 15         | 0.59 10.96 0.072 |
| 68. CR ( 1) C 14  | /286. RY*( 4) C 15         | 0.53 11.38 0.069 |
| 68. CR ( 1) C 14  | /439. BD*( 1) C 1 - N 13   | 1.16 10.56 0.099 |
| 69. CR ( 1) C 15  | /271. RY*( 2) C 14         | 1.00 11.43 0.096 |
| 69. CR ( 1) C 15  | /312. RY*( 4) C 17         | 0.66 10.90 0.076 |
| 70. CR ( 1) O 16  | /270. RY*( 1) C 14         | 5.82 19.67 0.303 |
| 70. CR ( 1) O 16  | /464. BD*( 1) C 14 - C 15  | 0.72 19.25 0.107 |
| 71. CR ( 1) C 17  | /284. RY*( 2) C 15         | 0.52 10.85 0.067 |
| 71. CR ( 1) C 17  | /323. RY*( 2) C 18         | 0.67 11.35 0.078 |
| 71. CR ( 1) C 17  | /328. RY*( 7) C 18         | 0.64 11.16 0.075 |
| 71. CR ( 1) C 17  | /473. BD*( 1) C 18 - O 19  | 0.56 10.36 0.070 |
| 72. CR ( 1) C 18  | /310. RY*( 2) C 17         | 0.84 10.99 0.086 |
| 72. CR ( 1) C 18  | /311. RY*( 3) C 17         | 0.55 11.38 0.070 |
| 72. CR ( 1) C 18  | /473. BD*( 1) C 18 - O 19  | 0.71 10.50 0.079 |
| 73. CR ( 1) O 19  | /322. RY*( 1) C 18         | 0.71 19.75 0.106 |
| 73. CR ( 1) O 19  | /323. RY*( 2) C 18         | 1.94 20.26 0.177 |
| 74. CR ( 1) O 20  | /322. RY*( 1) C 18         | 6.17 19.64 0.312 |
| 74. CR ( 1) O 20  | /470. BD*( 1) C 17 - C 18  | 0.72 19.26 0.106 |

|                   |                           |                  |
|-------------------|---------------------------|------------------|
| 75. LP ( 1) O 8   | /166. RY*( 1) C 7         | 1.66 1.51 0.045  |
| 75. LP ( 1) O 8   | /169. RY*( 4) C 7         | 1.61 2.61 0.058  |
| 75. LP ( 1) O 8   | /205. RY*( 1) C 10        | 1.66 1.65 0.047  |
| 75. LP ( 1) O 8   | /207. RY*( 3) C 10        | 0.74 1.54 0.030  |
| 75. LP ( 1) O 8   | /452. BD*( 1) C 7 - O 9   | 5.70 1.08 0.070  |
| 75. LP ( 1) O 8   | /455. BD*( 1) C 10 - H 24 | 0.64 0.95 0.022  |
| 75. LP ( 1) O 8   | /457. BD*( 1) C 10 - H 26 | 2.38 0.95 0.043  |
| 76. LP ( 2) O 8   | /168. RY*( 3) C 7         | 1.80 1.84 0.054  |
| 76. LP ( 2) O 8   | /206. RY*( 2) C 10        | 1.47 1.50 0.044  |
| 76. LP ( 2) O 8   | /453. BD*( 2) C 7 - O 9   | 38.54 0.31 0.100 |
| 76. LP ( 2) O 8   | /455. BD*( 1) C 10 - H 24 | 5.05 0.70 0.056  |
| 76. LP ( 2) O 8   | /456. BD*( 1) C 10 - H 25 | 5.06 0.69 0.055  |
| 77. LP ( 1) O 9   | /166. RY*( 1) C 7         | 12.36 1.64 0.127 |
| 77. LP ( 1) O 9   | /176. RY*( 11) C 7        | 0.75 4.91 0.055  |
| 77. LP ( 1) O 9   | /444. BD*( 1) C 3 - C 7   | 2.25 1.13 0.045  |
| 77. LP ( 1) O 9   | /451. BD*( 1) C 7 - O 8   | 0.98 0.99 0.028  |
| 78. LP ( 2) O 9   | /167. RY*( 2) C 7         | 1.92 1.70 0.053  |
| 78. LP ( 2) O 9   | /169. RY*( 4) C 7         | 1.72 2.30 0.058  |
| 78. LP ( 2) O 9   | /444. BD*( 1) C 3 - C 7   | 12.40 0.68 0.084 |
| 78. LP ( 2) O 9   | /451. BD*( 1) C 7 - O 8   | 28.89 0.55 0.113 |
| 78. LP ( 2) O 9   | /457. BD*( 1) C 10 - H 26 | 0.81 0.64 0.021  |
| 79. LP ( 1) Se 11 | /153. RY*( 1) C 6         | 1.18 1.76 0.041  |
| 79. LP ( 1) Se 11 | /447. BD*( 1) C 5 - C 6   | 3.33 1.34 0.060  |
| 80. LP ( 2) Se 11 | /445. BD*( 1) C 4 - C 6   | 1.62 0.69 0.030  |
| 80. LP ( 2) Se 11 | /447. BD*( 1) C 5 - C 6   | 1.11 0.87 0.028  |
| 80. LP ( 2) Se 11 | /448. BD*( 2) C 5 - C 6   | 9.24 0.26 0.045  |
| 80. LP ( 2) Se 11 | /459. BD*( 1) C 12 - H 27 | 4.11 0.61 0.046  |
| 80. LP ( 2) Se 11 | /461. BD*( 1) C 12 - H 29 | 2.49 0.61 0.036  |
| 81. LP ( 1) N 13  | / 90. RY*( 3) C 1         | 1.09 1.54 0.039  |
| 81. LP ( 1) N 13  | / 91. RY*( 4) C 1         | 0.76 1.61 0.034  |
| 81. LP ( 1) N 13  | /272. RY*( 3) C 14        | 1.66 1.71 0.051  |
| 81. LP ( 1) N 13  | /277. RY*( 8) C 14        | 0.51 1.71 0.029  |
| 81. LP ( 1) N 13  | /407. RY*( 2) H 30        | 0.75 1.95 0.037  |
| 81. LP ( 1) N 13  | /436. BD*( 1) C 1 - C 2   | 3.79 0.71 0.050  |
| 81. LP ( 1) N 13  | /437. BD*( 1) C 1 - C 3   | 2.86 0.89 0.048  |
| 81. LP ( 1) N 13  | /438. BD*( 2) C 1 - C 3   | 17.14 0.30 0.064 |
| 81. LP ( 1) N 13  | /466. BD*( 2) C 14 - O 16 | 50.70 0.26 0.103 |
| 82. LP ( 1) O 16  | /270. RY*( 1) C 14        | 13.70 1.51 0.128 |
| 82. LP ( 1) O 16  | /462. BD*( 1) N 13 - C 14 | 1.21 1.06 0.032  |
| 82. LP ( 1) O 16  | /464. BD*( 1) C 14 - C 15 | 2.20 1.09 0.044  |
| 83. LP ( 2) O 16  | /271. RY*( 2) C 14        | 1.50 1.61 0.045  |
| 83. LP ( 2) O 16  | /273. RY*( 4) C 14        | 1.84 2.52 0.063  |
| 83. LP ( 2) O 16  | /462. BD*( 1) N 13 - C 14 | 23.71 0.62 0.110 |
| 83. LP ( 2) O 16  | /464. BD*( 1) C 14 - C 15 | 15.30 0.64 0.090 |
| 83. LP ( 2) O 16  | /470. BD*( 1) C 17 - C 18 | 0.76 0.64 0.020  |
| 84. LP ( 1) O 19  | /322. RY*( 1) C 18        | 2.36 1.39 0.051  |
| 84. LP ( 1) O 19  | /323. RY*( 2) C 18        | 0.66 1.90 0.032  |
| 84. LP ( 1) O 19  | /325. RY*( 4) C 18        | 0.87 1.74 0.035  |
| 84. LP ( 1) O 19  | /326. RY*( 5) C 18        | 1.40 2.47 0.053  |
| 84. LP ( 1) O 19  | /433. RY*( 3) H 35        | 1.38 2.33 0.051  |
| 84. LP ( 1) O 19  | /474. BD*( 1) C 18 - O 20 | 5.37 1.12 0.069  |
| 85. LP ( 2) O 19  | /324. RY*( 3) C 18        | 2.07 1.87 0.058  |
| 85. LP ( 2) O 19  | /432. RY*( 2) H 35        | 1.48 1.82 0.049  |
| 85. LP ( 2) O 19  | /474. BD*( 1) C 18 - O 20 | 0.52 0.83 0.019  |
| 85. LP ( 2) O 19  | /475. BD*( 2) C 18 - O 20 | 37.54 0.34 0.102 |

|                          |                            |        |      |       |
|--------------------------|----------------------------|--------|------|-------|
| 86. LP ( 1) O 20         | /322. RY*( 1) C 18         | 14.63  | 1.48 | 0.131 |
| 86. LP ( 1) O 20         | /333. RY*( 12) C 18        | 0.71   | 5.48 | 0.056 |
| 86. LP ( 1) O 20         | /470. BD*( 1) C 17 - C 18  | 2.22   | 1.10 | 0.044 |
| 86. LP ( 1) O 20         | /473. BD*( 1) C 18 - O 19  | 0.90   | 1.00 | 0.027 |
| 87. LP ( 2) O 20         | /323. RY*( 2) C 18         | 2.66   | 1.54 | 0.059 |
| 87. LP ( 2) O 20         | /325. RY*( 4) C 18         | 0.70   | 1.38 | 0.029 |
| 87. LP ( 2) O 20         | /326. RY*( 5) C 18         | 1.02   | 2.11 | 0.043 |
| 87. LP ( 2) O 20         | /470. BD*( 1) C 17 - C 18  | 12.78  | 0.65 | 0.083 |
| 87. LP ( 2) O 20         | /471. BD*( 1) C 17 - H 33  | 0.69   | 0.64 | 0.019 |
| 87. LP ( 2) O 20         | /473. BD*( 1) C 18 - O 19  | 28.42  | 0.55 | 0.113 |
| 438. BD*( 2) C 1 - C 3   | / 92. RY*( 5) C 1          | 1.07   | 1.29 | 0.084 |
| 438. BD*( 2) C 1 - C 3   | /117. RY*( 4) C 3          | 0.92   | 0.74 | 0.059 |
| 438. BD*( 2) C 1 - C 3   | /441. BD*( 2) C 2 - C 4    | 129.94 | 0.01 | 0.072 |
| 438. BD*( 2) C 1 - C 3   | /451. BD*( 1) C 7 - O 8    | 0.80   | 0.25 | 0.028 |
| 438. BD*( 2) C 1 - C 3   | /462. BD*( 1) N 13 - C 14  | 0.71   | 0.34 | 0.031 |
| 438. BD*( 2) C 1 - C 3   | /463. BD*( 1) N 13 - H 30  | 0.99   | 0.31 | 0.039 |
| 441. BD*( 2) C 2 - C 4   | /103. RY*( 3) C 2          | 0.75   | 0.69 | 0.067 |
| 441. BD*( 2) C 2 - C 4   | /131. RY*( 5) C 4          | 0.85   | 1.38 | 0.101 |
| 448. BD*( 2) C 5 - C 6   | /142. RY*( 3) C 5          | 2.55   | 0.54 | 0.094 |
| 448. BD*( 2) C 5 - C 6   | /155. RY*( 3) C 6          | 0.55   | 0.86 | 0.055 |
| 448. BD*( 2) C 5 - C 6   | /458. BD*( 1) Se 11 - C 12 | 1.09   | 0.08 | 0.023 |
| 451. BD*( 1) C 7 - O 8   | /167. RY*( 2) C 7          | 1.61   | 1.15 | 0.162 |
| 451. BD*( 1) C 7 - O 8   | /179. RY*( 1) O 8          | 0.55   | 1.04 | 0.093 |
| 451. BD*( 1) C 7 - O 8   | /443. BD*( 1) C 3 - C 5    | 1.05   | 0.17 | 0.046 |
| 451. BD*( 1) C 7 - O 8   | /444. BD*( 1) C 3 - C 7    | 0.80   | 0.14 | 0.034 |
| 451. BD*( 1) C 7 - O 8   | /452. BD*( 1) C 7 - O 9    | 0.53   | 0.22 | 0.039 |
| 453. BD*( 2) C 7 - O 9   | /168. RY*( 3) C 7          | 1.52   | 1.52 | 0.119 |
| 453. BD*( 2) C 7 - O 9   | /193. RY*( 2) O 9          | 1.10   | 0.98 | 0.082 |
| 453. BD*( 2) C 7 - O 9   | /438. BD*( 2) C 1 - C 3    | 33.68  | 0.05 | 0.068 |
| 466. BD*( 2) C 14 - O 16 | /272. RY*( 3) C 14         | 1.29   | 1.45 | 0.106 |
| 466. BD*( 2) C 14 - O 16 | /277. RY*( 8) C 14         | 0.77   | 1.45 | 0.083 |
| 466. BD*( 2) C 14 - O 16 | /297. RY*( 2) O 16         | 1.21   | 1.00 | 0.086 |
| 466. BD*( 2) C 14 - O 16 | /468. BD*( 1) C 15 - H 31  | 1.13   | 0.37 | 0.050 |
| 466. BD*( 2) C 14 - O 16 | /469. BD*( 1) C 15 - H 32  | 1.10   | 0.37 | 0.048 |
| 475. BD*( 2) C 18 - O 20 | /324. RY*( 3) C 18         | 1.20   | 1.53 | 0.119 |
| 475. BD*( 2) C 18 - O 20 | /467. BD*( 1) C 15 - C 17  | 0.91   | 0.35 | 0.049 |
| 475. BD*( 2) C 18 - O 20 | /472. BD*( 1) C 17 - H 34  | 1.17   | 0.37 | 0.057 |
| 475. BD*( 2) C 18 - O 20 | /474. BD*( 1) C 18 - O 20  | 3.30   | 0.49 | 0.105 |

# NATURAL BOND ORBITAL ANALYSIS:

| Cycle | Occupancies |           |           | Lewis Structure |    | Low |    | High |     | (L)  | (NL) | Dev |
|-------|-------------|-----------|-----------|-----------------|----|-----|----|------|-----|------|------|-----|
|       | Thresh.     | Lewis     | Non-Lewis | CR              | BD | 3C  | LP | occ  | occ |      |      |     |
| 1(1)  | 1.90        | 168.02397 | 5.97603   | 33              | 42 | 0   | 12 | 18   | 10  | 0.64 |      |     |
| 2(2)  | 1.90        | 168.02397 | 5.97603   | 33              | 42 | 0   | 12 | 18   | 10  | 0.64 |      |     |
| 3(1)  | 1.80        | 169.18403 | 4.81597   | 33              | 39 | 0   | 15 | 3    | 7   | 0.64 |      |     |
| 4(2)  | 1.80        | 169.18403 | 4.81597   | 33              | 39 | 0   | 15 | 3    | 7   | 0.64 |      |     |
| 5(1)  | 1.70        | 171.29753 | 2.70247   | 33              | 41 | 0   | 13 | 0    | 7   | 0.21 |      |     |
| 6(2)  | 1.70        | 171.29753 | 2.70247   | 33              | 41 | 0   | 13 | 0    | 7   | 0.21 |      |     |
| 7(1)  | 1.60        | 171.29753 | 2.70247   | 33              | 41 | 0   | 13 | 0    | 7   | 0.21 |      |     |
| 8(2)  | 1.60        | 171.29753 | 2.70247   | 33              | 41 | 0   | 13 | 0    | 7   | 0.21 |      |     |
| 9(1)  | 1.50        | 170.78598 | 3.21402   | 33              | 40 | 0   | 14 | 0    | 9   | 0.74 |      |     |

|       |      |           |         |    |    |   |    |   |   |      |
|-------|------|-----------|---------|----|----|---|----|---|---|------|
| 10(2) | 1.50 | 170.33265 | 3.66735 | 33 | 40 | 0 | 14 | 1 | 9 | 1.04 |
| 11(3) | 1.50 | 170.78598 | 3.21402 | 33 | 40 | 0 | 14 | 0 | 9 | 0.74 |
| 12(1) | 1.70 | 171.29753 | 2.70247 | 33 | 41 | 0 | 13 | 0 | 7 | 0.21 |

```

-----
Core                65.98363 ( 99.975% of 66)
Valence Lewis       105.31390 ( 97.513% of 108)
=====
Total Lewis         171.29753 ( 98.447% of 174)
-----
Valence non-Lewis    2.39409 ( 1.376% of 174)
Rydberg non-Lewis    0.30839 ( 0.177% of 174)
=====
Total non-Lewis      2.70247 ( 1.553% of 174)
-----

```

## Compound 9

### Second Order Perturbation Theory Analysis of Fock Matrix in NBO Basis

Threshold for printing: 0.50 kcal/mol

| Donor NBO (i)        | Acceptor NBO (j)          | E(2)<br>kcal/mol | E(j)-E(i)<br>a.u. | F(i,j)<br>a.u. |
|----------------------|---------------------------|------------------|-------------------|----------------|
| =====                |                           |                  |                   |                |
| within unit 1        |                           |                  |                   |                |
| 1. BD ( 1) C 1 - C 2 | /133. RY*( 1) C 3         | 0.81             | 2.49              | 0.040          |
| 1. BD ( 1) C 1 - C 2 | /134. RY*( 2) C 3         | 0.65             | 1.95              | 0.032          |
| 1. BD ( 1) C 1 - C 2 | /147. RY*( 2) C 4         | 2.14             | 1.82              | 0.056          |
| 1. BD ( 1) C 1 - C 2 | /276. RY*( 1) N 13        | 0.90             | 1.52              | 0.033          |
| 1. BD ( 1) C 1 - C 2 | /544. BD*( 1) C 1 - C 3   | 4.26             | 1.27              | 0.066          |
| 1. BD ( 1) C 1 - C 2 | /546. BD*( 1) C 1 - N 13  | 0.57             | 1.02              | 0.022          |
| 1. BD ( 1) C 1 - C 2 | /547. BD*( 1) C 2 - C 4   | 2.92             | 1.31              | 0.055          |
| 1. BD ( 1) C 1 - C 2 | /549. BD*( 1) C 2 - H 29  | 0.61             | 1.10              | 0.023          |
| 1. BD ( 1) C 1 - C 2 | /551. BD*( 1) C 3 - C 7   | 4.39             | 1.07              | 0.062          |
| 1. BD ( 1) C 1 - C 2 | /553. BD*( 1) C 4 - H 30  | 2.81             | 1.10              | 0.050          |
| 1. BD ( 1) C 1 - C 2 | /570. BD*( 1) N 13 - H 37 | 1.59             | 1.00              | 0.036          |
| 2. BD ( 1) C 1 - C 3 | /120. RY*( 1) C 2         | 0.74             | 2.02              | 0.035          |
| 2. BD ( 1) C 1 - C 3 | /159. RY*( 1) C 5         | 0.60             | 1.90              | 0.030          |
| 2. BD ( 1) C 1 - C 3 | /188. RY*( 4) C 7         | 0.58             | 2.78              | 0.036          |
| 2. BD ( 1) C 1 - C 3 | /276. RY*( 1) N 13        | 0.68             | 1.62              | 0.030          |
| 2. BD ( 1) C 1 - C 3 | /543. BD*( 1) C 1 - C 2   | 3.48             | 1.20              | 0.058          |
| 2. BD ( 1) C 1 - C 3 | /546. BD*( 1) C 1 - N 13  | 2.08             | 1.12              | 0.043          |
| 2. BD ( 1) C 1 - C 3 | /549. BD*( 1) C 2 - H 29  | 1.30             | 1.20              | 0.035          |
| 2. BD ( 1) C 1 - C 3 | /550. BD*( 1) C 3 - C 5   | 4.25             | 1.20              | 0.064          |
| 2. BD ( 1) C 1 - C 3 | /551. BD*( 1) C 3 - C 7   | 2.93             | 1.17              | 0.053          |
| 2. BD ( 1) C 1 - C 3 | /556. BD*( 1) C 5 - H 31  | 1.32             | 1.21              | 0.036          |
| 2. BD ( 1) C 1 - C 3 | /559. BD*( 1) C 7 - O 9   | 1.16             | 1.26              | 0.034          |
| 2. BD ( 1) C 1 - C 3 | /569. BD*( 1) N 13 - C 14 | 2.11             | 1.11              | 0.044          |
| 3. BD ( 2) C 1 - C 3 | /122. RY*( 3) C 2         | 1.13             | 1.01              | 0.032          |
| 3. BD ( 2) C 1 - C 3 | /161. RY*( 3) C 5         | 0.88             | 0.86              | 0.026          |

|                       |                           |                  |
|-----------------------|---------------------------|------------------|
| 3. BD ( 2) C 1 - C 3  | /189. RY*( 5) C 7         | 0.60 1.47 0.029  |
| 3. BD ( 2) C 1 - C 3  | /548. BD*( 2) C 2 - C 4   | 10.74 0.33 0.054 |
| 3. BD ( 2) C 1 - C 3  | /555. BD*( 2) C 5 - C 6   | 13.48 0.32 0.059 |
| 3. BD ( 2) C 1 - C 3  | /558. BD*( 1) C 7 - O 8   | 1.11 0.57 0.023  |
| 3. BD ( 2) C 1 - C 3  | /560. BD*( 2) C 7 - O 9   | 18.85 0.27 0.064 |
| 3. BD ( 2) C 1 - C 3  | /569. BD*( 1) N 13 - C 14 | 1.49 0.65 0.029  |
| 3. BD ( 2) C 1 - C 3  | /570. BD*( 1) N 13 - H 37 | 1.48 0.63 0.029  |
| 4. BD ( 1) C 1 - N 13 | /120. RY*( 1) C 2         | 0.52 2.06 0.029  |
| 4. BD ( 1) C 1 - N 13 | /133. RY*( 1) C 3         | 1.36 2.63 0.053  |
| 4. BD ( 1) C 1 - N 13 | /289. RY*( 1) C 14        | 1.52 1.68 0.045  |
| 4. BD ( 1) C 1 - N 13 | /543. BD*( 1) C 1 - C 2   | 0.64 1.24 0.025  |
| 4. BD ( 1) C 1 - N 13 | /544. BD*( 1) C 1 - C 3   | 2.15 1.41 0.049  |
| 4. BD ( 1) C 1 - N 13 | /547. BD*( 1) C 2 - C 4   | 0.86 1.45 0.031  |
| 4. BD ( 1) C 1 - N 13 | /550. BD*( 1) C 3 - C 5   | 2.69 1.24 0.052  |
| 4. BD ( 1) C 1 - N 13 | /569. BD*( 1) N 13 - C 14 | 0.86 1.15 0.029  |
| 4. BD ( 1) C 1 - N 13 | /571. BD*( 1) C 14 - C 15 | 1.69 1.22 0.041  |
| 5. BD ( 1) C 2 - C 4  | /107. RY*( 1) C 1         | 1.41 1.95 0.047  |
| 5. BD ( 1) C 2 - C 4  | /109. RY*( 3) C 1         | 0.91 1.99 0.038  |
| 5. BD ( 1) C 2 - C 4  | /172. RY*( 1) C 6         | 1.10 1.82 0.040  |
| 5. BD ( 1) C 2 - C 4  | /543. BD*( 1) C 1 - C 2   | 2.72 1.19 0.051  |
| 5. BD ( 1) C 2 - C 4  | /546. BD*( 1) C 1 - N 13  | 2.80 1.12 0.050  |
| 5. BD ( 1) C 2 - C 4  | /549. BD*( 1) C 2 - H 29  | 1.69 1.20 0.040  |
| 5. BD ( 1) C 2 - C 4  | /552. BD*( 1) C 4 - C 6   | 3.64 1.21 0.059  |
| 5. BD ( 1) C 2 - C 4  | /553. BD*( 1) C 4 - H 30  | 1.57 1.19 0.039  |
| 5. BD ( 1) C 2 - C 4  | /557. BD*( 1) C 6 -Se 11  | 3.10 0.88 0.047  |
| 6. BD ( 2) C 2 - C 4  | /112. RY*( 6) C 1         | 0.63 1.80 0.032  |
| 6. BD ( 2) C 2 - C 4  | /545. BD*( 2) C 1 - C 3   | 14.31 0.31 0.060 |
| 6. BD ( 2) C 2 - C 4  | /555. BD*( 2) C 5 - C 6   | 13.00 0.31 0.057 |
| 7. BD ( 1) C 2 - H 29 | /107. RY*( 1) C 1         | 0.64 1.72 0.030  |
| 7. BD ( 1) C 2 - H 29 | /108. RY*( 2) C 1         | 0.87 1.83 0.036  |
| 7. BD ( 1) C 2 - H 29 | /146. RY*( 1) C 4         | 1.44 1.68 0.044  |
| 7. BD ( 1) C 2 - H 29 | /544. BD*( 1) C 1 - C 3   | 3.22 1.14 0.054  |
| 7. BD ( 1) C 2 - H 29 | /546. BD*( 1) C 1 - N 13  | 0.61 0.89 0.021  |
| 7. BD ( 1) C 2 - H 29 | /547. BD*( 1) C 2 - C 4   | 1.59 1.18 0.039  |
| 7. BD ( 1) C 2 - H 29 | /552. BD*( 1) C 4 - C 6   | 5.68 0.98 0.067  |
| 7. BD ( 1) C 2 - H 29 | /553. BD*( 1) C 4 - H 30  | 0.94 0.96 0.027  |
| 8. BD ( 1) C 3 - C 5  | /108. RY*( 2) C 1         | 1.22 1.95 0.044  |
| 8. BD ( 1) C 3 - C 5  | /173. RY*( 2) C 6         | 1.44 1.48 0.042  |
| 8. BD ( 1) C 3 - C 5  | /185. RY*( 1) C 7         | 0.99 1.58 0.036  |
| 8. BD ( 1) C 3 - C 5  | /544. BD*( 1) C 1 - C 3   | 4.60 1.26 0.068  |
| 8. BD ( 1) C 3 - C 5  | /546. BD*( 1) C 1 - N 13  | 5.34 1.01 0.066  |
| 8. BD ( 1) C 3 - C 5  | /551. BD*( 1) C 3 - C 7   | 1.68 1.06 0.038  |
| 8. BD ( 1) C 3 - C 5  | /554. BD*( 1) C 5 - C 6   | 3.91 1.29 0.064  |
| 8. BD ( 1) C 3 - C 5  | /556. BD*( 1) C 5 - H 31  | 0.62 1.10 0.023  |
| 8. BD ( 1) C 3 - C 5  | /557. BD*( 1) C 6 -Se 11  | 5.49 0.78 0.059  |
| 8. BD ( 1) C 3 - C 5  | /558. BD*( 1) C 7 - O 8   | 2.84 0.92 0.046  |
| 8. BD ( 1) C 3 - C 5  | /560. BD*( 2) C 7 - O 9   | 0.55 0.63 0.018  |
| 9. BD ( 1) C 3 - C 7  | /107. RY*( 1) C 1         | 0.84 1.88 0.036  |
| 9. BD ( 1) C 3 - C 7  | /108. RY*( 2) C 1         | 1.03 2.00 0.041  |
| 9. BD ( 1) C 3 - C 7  | /159. RY*( 1) C 5         | 1.05 1.84 0.039  |
| 9. BD ( 1) C 3 - C 7  | /211. RY*( 1) O 9         | 0.72 1.81 0.032  |
| 9. BD ( 1) C 3 - C 7  | /543. BD*( 1) C 1 - C 2   | 3.77 1.13 0.058  |
| 9. BD ( 1) C 3 - C 7  | /544. BD*( 1) C 1 - C 3   | 3.96 1.30 0.064  |
| 9. BD ( 1) C 3 - C 7  | /550. BD*( 1) C 3 - C 5   | 1.29 1.13 0.034  |
| 9. BD ( 1) C 3 - C 7  | /554. BD*( 1) C 5 - C 6   | 1.47 1.33 0.040  |

|                         |                           |                  |
|-------------------------|---------------------------|------------------|
| 9. BD ( 1) C 3 - C 7    | /559. BD*( 1) C 7 - O 9   | 0.95 1.19 0.030  |
| 9. BD ( 1) C 3 - C 7    | /561. BD*( 1) O 8 - C 10  | 2.85 0.96 0.047  |
| 10. BD ( 1) C 4 - C 6   | /120. RY*( 1) C 2         | 0.74 1.93 0.034  |
| 10. BD ( 1) C 4 - C 6   | /121. RY*( 2) C 2         | 1.59 2.01 0.051  |
| 10. BD ( 1) C 4 - C 6   | /159. RY*( 1) C 5         | 0.84 1.82 0.035  |
| 10. BD ( 1) C 4 - C 6   | /160. RY*( 2) C 5         | 0.95 1.63 0.035  |
| 10. BD ( 1) C 4 - C 6   | /547. BD*( 1) C 2 - C 4   | 3.20 1.32 0.058  |
| 10. BD ( 1) C 4 - C 6   | /549. BD*( 1) C 2 - H 29  | 2.66 1.12 0.049  |
| 10. BD ( 1) C 4 - C 6   | /553. BD*( 1) C 4 - H 30  | 0.87 1.11 0.028  |
| 10. BD ( 1) C 4 - C 6   | /554. BD*( 1) C 5 - C 6   | 3.49 1.32 0.061  |
| 10. BD ( 1) C 4 - C 6   | /556. BD*( 1) C 5 - H 31  | 3.42 1.12 0.055  |
| 11. BD ( 1) C 4 - H 30  | /120. RY*( 1) C 2         | 1.53 1.79 0.047  |
| 11. BD ( 1) C 4 - H 30  | /172. RY*( 1) C 6         | 1.12 1.60 0.038  |
| 11. BD ( 1) C 4 - H 30  | /543. BD*( 1) C 1 - C 2   | 5.68 0.97 0.066  |
| 11. BD ( 1) C 4 - H 30  | /547. BD*( 1) C 2 - C 4   | 1.50 1.18 0.038  |
| 11. BD ( 1) C 4 - H 30  | /549. BD*( 1) C 2 - H 29  | 0.96 0.97 0.027  |
| 11. BD ( 1) C 4 - H 30  | /554. BD*( 1) C 5 - C 6   | 3.20 1.17 0.055  |
| 12. BD ( 1) C 5 - C 6   | /133. RY*( 1) C 3         | 1.41 2.60 0.054  |
| 12. BD ( 1) C 5 - C 6   | /134. RY*( 2) C 3         | 0.71 2.06 0.034  |
| 12. BD ( 1) C 5 - C 6   | /146. RY*( 1) C 4         | 1.04 1.92 0.040  |
| 12. BD ( 1) C 5 - C 6   | /550. BD*( 1) C 3 - C 5   | 3.34 1.21 0.057  |
| 12. BD ( 1) C 5 - C 6   | /551. BD*( 1) C 3 - C 7   | 2.03 1.18 0.044  |
| 12. BD ( 1) C 5 - C 6   | /552. BD*( 1) C 4 - C 6   | 3.14 1.23 0.056  |
| 12. BD ( 1) C 5 - C 6   | /553. BD*( 1) C 4 - H 30  | 1.64 1.21 0.040  |
| 12. BD ( 1) C 5 - C 6   | /556. BD*( 1) C 5 - H 31  | 2.31 1.22 0.047  |
| 13. BD ( 2) C 5 - C 6   | /136. RY*( 4) C 3         | 0.61 1.06 0.024  |
| 13. BD ( 2) C 5 - C 6   | /148. RY*( 3) C 4         | 1.68 1.13 0.041  |
| 13. BD ( 2) C 5 - C 6   | /237. RY*( 1) Se 11       | 0.93 0.82 0.026  |
| 13. BD ( 2) C 5 - C 6   | /545. BD*( 2) C 1 - C 3   | 11.98 0.31 0.056 |
| 13. BD ( 2) C 5 - C 6   | /548. BD*( 2) C 2 - C 4   | 13.07 0.32 0.059 |
| 14. BD ( 1) C 5 - H 31  | /133. RY*( 1) C 3         | 1.81 2.36 0.059  |
| 14. BD ( 1) C 5 - H 31  | /172. RY*( 1) C 6         | 1.79 1.59 0.048  |
| 14. BD ( 1) C 5 - H 31  | /544. BD*( 1) C 1 - C 3   | 3.08 1.14 0.053  |
| 14. BD ( 1) C 5 - H 31  | /552. BD*( 1) C 4 - C 6   | 6.01 0.98 0.069  |
| 14. BD ( 1) C 5 - H 31  | /554. BD*( 1) C 5 - C 6   | 2.18 1.17 0.045  |
| 15. BD ( 1) C 6 - Se 11 | /146. RY*( 1) C 4         | 2.10 1.74 0.054  |
| 15. BD ( 1) C 6 - Se 11 | /159. RY*( 1) C 5         | 1.68 1.73 0.048  |
| 15. BD ( 1) C 6 - Se 11 | /264. RY*( 2) C 12        | 0.66 1.57 0.029  |
| 15. BD ( 1) C 6 - Se 11 | /547. BD*( 1) C 2 - C 4   | 2.68 1.24 0.052  |
| 15. BD ( 1) C 6 - Se 11 | /550. BD*( 1) C 3 - C 5   | 5.32 1.03 0.066  |
| 15. BD ( 1) C 6 - Se 11 | /554. BD*( 1) C 5 - C 6   | 1.01 1.23 0.032  |
| 15. BD ( 1) C 6 - Se 11 | /556. BD*( 1) C 5 - H 31  | 0.95 1.04 0.028  |
| 15. BD ( 1) C 6 - Se 11 | /566. BD*( 1) C 12 - C 21 | 0.89 1.01 0.027  |
| 16. BD ( 1) C 7 - O 8   | /134. RY*( 2) C 3         | 1.04 2.16 0.042  |
| 16. BD ( 1) C 7 - O 8   | /226. RY*( 3) C 10        | 1.07 1.84 0.040  |
| 16. BD ( 1) C 7 - O 8   | /550. BD*( 1) C 3 - C 5   | 1.27 1.32 0.037  |
| 16. BD ( 1) C 7 - O 8   | /564. BD*( 1) C 10 - H 34 | 0.66 1.24 0.025  |
| 17. BD ( 1) C 7 - O 9   | /134. RY*( 2) C 3         | 1.33 2.30 0.049  |
| 17. BD ( 1) C 7 - O 9   | /185. RY*( 1) C 7         | 1.64 1.94 0.050  |
| 17. BD ( 1) C 7 - O 9   | /544. BD*( 1) C 1 - C 3   | 1.54 1.62 0.045  |
| 17. BD ( 1) C 7 - O 9   | /551. BD*( 1) C 3 - C 7   | 1.77 1.42 0.045  |
| 18. BD ( 2) C 7 - O 9   | /545. BD*( 2) C 1 - C 3   | 4.53 0.40 0.041  |
| 18. BD ( 2) C 7 - O 9   | /560. BD*( 2) C 7 - O 9   | 0.65 0.36 0.014  |
| 19. BD ( 1) O 8 - C 10  | /185. RY*( 1) C 7         | 1.27 1.77 0.042  |
| 19. BD ( 1) O 8 - C 10  | /551. BD*( 1) C 3 - C 7   | 2.61 1.26 0.052  |

|                          |                           |                 |
|--------------------------|---------------------------|-----------------|
| 20. BD ( 1) C 10 - H 32  | /199. RY*( 2) O 8         | 0.53 1.51 0.025 |
| 21. BD ( 1) C 10 - H 33  | /199. RY*( 2) O 8         | 0.58 1.51 0.026 |
| 21. BD ( 1) C 10 - H 33  | /561. BD*( 1) O 8 - C 10  | 0.58 0.79 0.019 |
| 22. BD ( 1) C 10 - H 34  | /558. BD*( 1) C 7 - O 8   | 3.93 0.80 0.051 |
| 23. BD ( 1) Se 11 - C 12 | /382. RY*( 3) C 21        | 0.87 1.27 0.030 |
| 23. BD ( 1) Se 11 - C 12 | /552. BD*( 1) C 4 - C 6   | 1.79 1.02 0.038 |
| 23. BD ( 1) Se 11 - C 12 | /555. BD*( 2) C 5 - C 6   | 1.00 0.59 0.023 |
| 23. BD ( 1) Se 11 - C 12 | /584. BD*( 1) C 21 - C 23 | 1.64 1.21 0.040 |
| 23. BD ( 1) Se 11 - C 12 | /585. BD*( 2) C 21 - C 23 | 4.19 0.61 0.048 |
| 24. BD ( 1) C 12 - C 21  | /393. RY*( 1) C 22        | 1.63 1.81 0.049 |
| 24. BD ( 1) C 12 - C 21  | /406. RY*( 1) C 23        | 1.83 1.82 0.052 |
| 24. BD ( 1) C 12 - C 21  | /567. BD*( 1) C 12 - H 35 | 0.66 1.04 0.023 |
| 24. BD ( 1) C 12 - C 21  | /568. BD*( 1) C 12 - H 36 | 0.54 1.04 0.021 |
| 24. BD ( 1) C 12 - C 21  | /583. BD*( 1) C 21 - C 22 | 1.52 1.12 0.037 |
| 24. BD ( 1) C 12 - C 21  | /584. BD*( 1) C 21 - C 23 | 3.69 1.31 0.062 |
| 24. BD ( 1) C 12 - C 21  | /586. BD*( 1) C 22 - C 24 | 1.40 1.32 0.038 |
| 24. BD ( 1) C 12 - C 21  | /589. BD*( 1) C 23 - C 25 | 3.28 1.13 0.054 |
| 25. BD ( 1) C 12 - H 35  | /382. RY*( 3) C 21        | 0.82 1.23 0.028 |
| 25. BD ( 1) C 12 - H 35  | /566. BD*( 1) C 12 - C 21 | 0.58 0.93 0.021 |
| 25. BD ( 1) C 12 - H 35  | /584. BD*( 1) C 21 - C 23 | 2.62 1.17 0.049 |
| 25. BD ( 1) C 12 - H 35  | /585. BD*( 2) C 21 - C 23 | 3.18 0.56 0.040 |
| 26. BD ( 1) C 12 - H 36  | /381. RY*( 2) C 21        | 0.67 1.65 0.030 |
| 26. BD ( 1) C 12 - H 36  | /566. BD*( 1) C 12 - C 21 | 0.52 0.94 0.020 |
| 26. BD ( 1) C 12 - H 36  | /583. BD*( 1) C 21 - C 22 | 4.83 0.98 0.062 |
| 27. BD ( 1) N 13 - C 14  | /107. RY*( 1) C 1         | 0.75 1.99 0.034 |
| 27. BD ( 1) N 13 - C 14  | /108. RY*( 2) C 1         | 0.77 2.10 0.036 |
| 27. BD ( 1) N 13 - C 14  | /303. RY*( 2) C 15        | 1.00 1.89 0.039 |
| 27. BD ( 1) N 13 - C 14  | /544. BD*( 1) C 1 - C 3   | 1.62 1.41 0.043 |
| 27. BD ( 1) N 13 - C 14  | /546. BD*( 1) C 1 - N 13  | 1.06 1.16 0.031 |
| 27. BD ( 1) N 13 - C 14  | /574. BD*( 1) C 15 - C 17 | 1.10 1.42 0.035 |
| 28. BD ( 1) N 13 - H 37  | /107. RY*( 1) C 1         | 1.09 1.85 0.040 |
| 28. BD ( 1) N 13 - H 37  | /290. RY*( 2) C 14        | 0.83 2.04 0.037 |
| 28. BD ( 1) N 13 - H 37  | /292. RY*( 4) C 14        | 0.91 3.07 0.047 |
| 28. BD ( 1) N 13 - H 37  | /543. BD*( 1) C 1 - C 2   | 2.11 1.10 0.043 |
| 28. BD ( 1) N 13 - H 37  | /545. BD*( 2) C 1 - C 3   | 1.53 0.69 0.031 |
| 28. BD ( 1) N 13 - H 37  | /572. BD*( 1) C 14 - O 16 | 2.95 1.18 0.053 |
| 29. BD ( 1) C 14 - C 15  | /277. RY*( 2) N 13        | 1.36 1.77 0.044 |
| 29. BD ( 1) C 14 - C 15  | /315. RY*( 1) O 16        | 0.63 1.86 0.031 |
| 29. BD ( 1) C 14 - C 15  | /328. RY*( 1) C 17        | 2.27 1.82 0.058 |
| 29. BD ( 1) C 14 - C 15  | /546. BD*( 1) C 1 - N 13  | 2.92 1.07 0.050 |
| 29. BD ( 1) C 14 - C 15  | /572. BD*( 1) C 14 - O 16 | 0.96 1.21 0.031 |
| 29. BD ( 1) C 14 - C 15  | /574. BD*( 1) C 15 - C 17 | 2.76 1.32 0.054 |
| 29. BD ( 1) C 14 - C 15  | /577. BD*( 1) C 17 - C 18 | 3.42 1.11 0.055 |
| 30. BD ( 1) C 14 - O 16  | /289. RY*( 1) C 14        | 1.66 1.88 0.050 |
| 30. BD ( 1) C 14 - O 16  | /569. BD*( 1) N 13 - C 14 | 0.54 1.36 0.025 |
| 30. BD ( 1) C 14 - O 16  | /570. BD*( 1) N 13 - H 37 | 1.15 1.34 0.035 |
| 30. BD ( 1) C 14 - O 16  | /571. BD*( 1) C 14 - C 15 | 1.56 1.43 0.043 |
| 30. BD ( 1) C 14 - O 16  | /576. BD*( 1) C 15 - H 27 | 0.86 1.42 0.031 |
| 31. BD ( 2) C 14 - O 16  | /305. RY*( 4) C 15        | 0.64 1.03 0.023 |
| 31. BD ( 2) C 14 - O 16  | /573. BD*( 2) C 14 - O 16 | 0.75 0.35 0.016 |
| 31. BD ( 2) C 14 - O 16  | /575. BD*( 2) C 15 - C 17 | 5.17 0.38 0.040 |
| 32. BD ( 1) C 15 - C 17  | /289. RY*( 1) C 14        | 2.15 1.66 0.053 |
| 32. BD ( 1) C 15 - C 17  | /341. RY*( 1) C 18        | 2.20 1.66 0.054 |
| 32. BD ( 1) C 15 - C 17  | /569. BD*( 1) N 13 - C 14 | 2.46 1.14 0.048 |
| 32. BD ( 1) C 15 - C 17  | /571. BD*( 1) C 14 - C 15 | 2.35 1.20 0.048 |

|                         |                           |       |      |       |
|-------------------------|---------------------------|-------|------|-------|
| 32. BD ( 1) C 15 - C 17 | /576. BD*( 1) C 15 - H 27 | 1.64  | 1.20 | 0.040 |
| 32. BD ( 1) C 15 - C 17 | /577. BD*( 1) C 17 - C 18 | 2.00  | 1.19 | 0.044 |
| 32. BD ( 1) C 15 - C 17 | /578. BD*( 1) C 17 - H 28 | 1.69  | 1.21 | 0.040 |
| 32. BD ( 1) C 15 - C 17 | /579. BD*( 1) C 18 - O 19 | 2.33  | 1.06 | 0.045 |
| 33. BD ( 2) C 15 - C 17 | /293. RY*( 5) C 14        | 0.76  | 1.57 | 0.032 |
| 33. BD ( 2) C 15 - C 17 | /345. RY*( 5) C 18        | 0.96  | 1.63 | 0.037 |
| 33. BD ( 2) C 15 - C 17 | /573. BD*( 2) C 14 - O 16 | 17.56 | 0.29 | 0.066 |
| 33. BD ( 2) C 15 - C 17 | /581. BD*( 2) C 18 - O 20 | 19.27 | 0.28 | 0.067 |
| 34. BD ( 1) C 15 - H 27 | /290. RY*( 2) C 14        | 0.64  | 1.93 | 0.031 |
| 34. BD ( 1) C 15 - H 27 | /292. RY*( 4) C 14        | 0.73  | 2.96 | 0.042 |
| 34. BD ( 1) C 15 - H 27 | /328. RY*( 1) C 17        | 1.01  | 1.67 | 0.037 |
| 34. BD ( 1) C 15 - H 27 | /329. RY*( 2) C 17        | 0.63  | 1.60 | 0.029 |
| 34. BD ( 1) C 15 - H 27 | /572. BD*( 1) C 14 - O 16 | 3.46  | 1.06 | 0.054 |
| 34. BD ( 1) C 15 - H 27 | /574. BD*( 1) C 15 - C 17 | 1.48  | 1.17 | 0.037 |
| 34. BD ( 1) C 15 - H 27 | /578. BD*( 1) C 17 - H 28 | 4.54  | 0.98 | 0.060 |
| 35. BD ( 1) C 17 - C 18 | /302. RY*( 1) C 15        | 2.14  | 1.74 | 0.055 |
| 35. BD ( 1) C 17 - C 18 | /367. RY*( 1) O 20        | 0.75  | 1.78 | 0.033 |
| 35. BD ( 1) C 17 - C 18 | /571. BD*( 1) C 14 - C 15 | 3.39  | 1.13 | 0.056 |
| 35. BD ( 1) C 17 - C 18 | /574. BD*( 1) C 15 - C 17 | 2.34  | 1.33 | 0.050 |
| 35. BD ( 1) C 17 - C 18 | /580. BD*( 1) C 18 - O 20 | 0.75  | 1.22 | 0.027 |
| 35. BD ( 1) C 17 - C 18 | /582. BD*( 1) O 19 - H 38 | 1.70  | 1.01 | 0.037 |
| 36. BD ( 1) C 17 - H 28 | /302. RY*( 1) C 15        | 1.05  | 1.57 | 0.036 |
| 36. BD ( 1) C 17 - H 28 | /303. RY*( 2) C 15        | 0.66  | 1.63 | 0.029 |
| 36. BD ( 1) C 17 - H 28 | /344. RY*( 4) C 18        | 0.69  | 2.81 | 0.040 |
| 36. BD ( 1) C 17 - H 28 | /574. BD*( 1) C 15 - C 17 | 1.67  | 1.16 | 0.039 |
| 36. BD ( 1) C 17 - H 28 | /576. BD*( 1) C 15 - H 27 | 4.95  | 0.96 | 0.062 |
| 36. BD ( 1) C 17 - H 28 | /580. BD*( 1) C 18 - O 20 | 3.24  | 1.05 | 0.052 |
| 37. BD ( 1) C 18 - O 19 | /329. RY*( 2) C 17        | 0.72  | 1.97 | 0.034 |
| 37. BD ( 1) C 18 - O 19 | /574. BD*( 1) C 15 - C 17 | 1.02  | 1.53 | 0.035 |
| 38. BD ( 1) C 18 - O 20 | /329. RY*( 2) C 17        | 0.58  | 2.06 | 0.031 |
| 38. BD ( 1) C 18 - O 20 | /341. RY*( 1) C 18        | 1.59  | 1.90 | 0.049 |
| 38. BD ( 1) C 18 - O 20 | /577. BD*( 1) C 17 - C 18 | 1.40  | 1.42 | 0.040 |
| 38. BD ( 1) C 18 - O 20 | /578. BD*( 1) C 17 - H 28 | 0.88  | 1.44 | 0.032 |
| 39. BD ( 2) C 18 - O 20 | /331. RY*( 4) C 17        | 0.64  | 0.96 | 0.022 |
| 39. BD ( 2) C 18 - O 20 | /575. BD*( 2) C 15 - C 17 | 5.11  | 0.39 | 0.040 |
| 39. BD ( 2) C 18 - O 20 | /581. BD*( 2) C 18 - O 20 | 0.73  | 0.35 | 0.015 |
| 40. BD ( 1) O 19 - H 38 | /341. RY*( 1) C 18        | 0.95  | 1.62 | 0.035 |
| 40. BD ( 1) O 19 - H 38 | /342. RY*( 2) C 18        | 0.73  | 2.04 | 0.035 |
| 40. BD ( 1) O 19 - H 38 | /347. RY*( 7) C 18        | 0.69  | 2.04 | 0.034 |
| 40. BD ( 1) O 19 - H 38 | /577. BD*( 1) C 17 - C 18 | 3.64  | 1.15 | 0.058 |
| 40. BD ( 1) O 19 - H 38 | /580. BD*( 1) C 18 - O 20 | 1.29  | 1.24 | 0.036 |
| 41. BD ( 1) C 21 - C 22 | /263. RY*( 1) C 12        | 1.25  | 1.30 | 0.036 |
| 41. BD ( 1) C 21 - C 22 | /406. RY*( 1) C 23        | 0.93  | 1.80 | 0.037 |
| 41. BD ( 1) C 21 - C 22 | /419. RY*( 1) C 24        | 0.90  | 1.92 | 0.037 |
| 41. BD ( 1) C 21 - C 22 | /420. RY*( 2) C 24        | 1.68  | 2.10 | 0.053 |
| 41. BD ( 1) C 21 - C 22 | /566. BD*( 1) C 12 - C 21 | 1.52  | 1.06 | 0.036 |
| 41. BD ( 1) C 21 - C 22 | /568. BD*( 1) C 12 - H 36 | 1.12  | 1.02 | 0.030 |
| 41. BD ( 1) C 21 - C 22 | /584. BD*( 1) C 21 - C 23 | 3.67  | 1.29 | 0.062 |
| 41. BD ( 1) C 21 - C 22 | /586. BD*( 1) C 22 - C 24 | 3.17  | 1.30 | 0.058 |
| 41. BD ( 1) C 21 - C 22 | /588. BD*( 1) C 22 - H 39 | 0.61  | 1.09 | 0.023 |
| 41. BD ( 1) C 21 - C 22 | /590. BD*( 1) C 23 - H 40 | 3.34  | 1.08 | 0.054 |
| 41. BD ( 1) C 21 - C 22 | /592. BD*( 1) C 24 - H 41 | 2.98  | 1.09 | 0.051 |
| 42. BD ( 1) C 21 - C 23 | /263. RY*( 1) C 12        | 0.91  | 1.40 | 0.032 |
| 42. BD ( 1) C 21 - C 23 | /393. RY*( 1) C 22        | 0.81  | 1.89 | 0.035 |
| 42. BD ( 1) C 21 - C 23 | /432. RY*( 1) C 25        | 0.99  | 2.03 | 0.040 |

|                         |                            |                  |
|-------------------------|----------------------------|------------------|
| 42. BD ( 1) C 21 - C 23 | /433. RY*( 2) C 25         | 1.06 2.19 0.043  |
| 42. BD ( 1) C 21 - C 23 | /565. BD*( 1) Se 11 - C 12 | 0.83 0.84 0.023  |
| 42. BD ( 1) C 21 - C 23 | /566. BD*( 1) C 12 - C 21  | 3.53 1.16 0.057  |
| 42. BD ( 1) C 21 - C 23 | /583. BD*( 1) C 21 - C 22  | 3.50 1.20 0.058  |
| 42. BD ( 1) C 21 - C 23 | /588. BD*( 1) C 22 - H 39  | 1.56 1.19 0.039  |
| 42. BD ( 1) C 21 - C 23 | /589. BD*( 1) C 23 - C 25  | 2.95 1.21 0.053  |
| 42. BD ( 1) C 21 - C 23 | /590. BD*( 1) C 23 - H 40  | 1.81 1.18 0.041  |
| 42. BD ( 1) C 21 - C 23 | /595. BD*( 1) C 25 - H 42  | 1.39 1.19 0.036  |
| 43. BD ( 2) C 21 - C 23 | /395. RY*( 3) C 22         | 1.46 0.99 0.036  |
| 43. BD ( 2) C 21 - C 23 | /434. RY*( 3) C 25         | 1.38 1.12 0.037  |
| 43. BD ( 2) C 21 - C 23 | /565. BD*( 1) Se 11 - C 12 | 4.56 0.37 0.039  |
| 43. BD ( 2) C 21 - C 23 | /567. BD*( 1) C 12 - H 35  | 2.66 0.65 0.039  |
| 43. BD ( 2) C 21 - C 23 | /587. BD*( 2) C 22 - C 24  | 12.42 0.32 0.056 |
| 43. BD ( 2) C 21 - C 23 | /594. BD*( 2) C 25 - C 26  | 13.26 0.32 0.058 |
| 44. BD ( 1) C 22 - C 24 | /380. RY*( 1) C 21         | 1.41 2.04 0.048  |
| 44. BD ( 1) C 22 - C 24 | /381. RY*( 2) C 21         | 0.78 1.87 0.034  |
| 44. BD ( 1) C 22 - C 24 | /445. RY*( 1) C 26         | 0.87 2.03 0.038  |
| 44. BD ( 1) C 22 - C 24 | /446. RY*( 2) C 26         | 0.96 2.18 0.041  |
| 44. BD ( 1) C 22 - C 24 | /566. BD*( 1) C 12 - C 21  | 2.68 1.16 0.050  |
| 44. BD ( 1) C 22 - C 24 | /583. BD*( 1) C 21 - C 22  | 3.18 1.20 0.055  |
| 44. BD ( 1) C 22 - C 24 | /588. BD*( 1) C 22 - H 39  | 1.63 1.19 0.039  |
| 44. BD ( 1) C 22 - C 24 | /591. BD*( 1) C 24 - C 26  | 2.54 1.21 0.050  |
| 44. BD ( 1) C 22 - C 24 | /592. BD*( 1) C 24 - H 41  | 1.62 1.19 0.039  |
| 44. BD ( 1) C 22 - C 24 | /596. BD*( 1) C 26 - H 43  | 1.56 1.19 0.038  |
| 45. BD ( 2) C 22 - C 24 | /447. RY*( 3) C 26         | 1.43 0.96 0.035  |
| 45. BD ( 2) C 22 - C 24 | /585. BD*( 2) C 21 - C 23  | 13.88 0.32 0.059 |
| 45. BD ( 2) C 22 - C 24 | /594. BD*( 2) C 25 - C 26  | 13.17 0.31 0.058 |
| 46. BD ( 1) C 22 - H 39 | /380. RY*( 1) C 21         | 1.57 1.82 0.048  |
| 46. BD ( 1) C 22 - H 39 | /419. RY*( 1) C 24         | 1.60 1.80 0.048  |
| 46. BD ( 1) C 22 - H 39 | /584. BD*( 1) C 21 - C 23  | 3.18 1.17 0.054  |
| 46. BD ( 1) C 22 - H 39 | /586. BD*( 1) C 22 - C 24  | 1.45 1.18 0.037  |
| 46. BD ( 1) C 22 - H 39 | /591. BD*( 1) C 24 - C 26  | 5.18 0.99 0.064  |
| 46. BD ( 1) C 22 - H 39 | /592. BD*( 1) C 24 - H 41  | 0.86 0.97 0.026  |
| 47. BD ( 1) C 23 - C 25 | /381. RY*( 2) C 21         | 1.77 1.77 0.050  |
| 47. BD ( 1) C 23 - C 25 | /445. RY*( 1) C 26         | 0.70 1.93 0.033  |
| 47. BD ( 1) C 23 - C 25 | /446. RY*( 2) C 26         | 1.60 2.08 0.052  |
| 47. BD ( 1) C 23 - C 25 | /566. BD*( 1) C 12 - C 21  | 5.18 1.06 0.066  |
| 47. BD ( 1) C 23 - C 25 | /584. BD*( 1) C 21 - C 23  | 3.49 1.29 0.060  |
| 47. BD ( 1) C 23 - C 25 | /593. BD*( 1) C 25 - C 26  | 2.80 1.30 0.054  |
| 47. BD ( 1) C 23 - C 25 | /595. BD*( 1) C 25 - H 42  | 0.52 1.09 0.021  |
| 47. BD ( 1) C 23 - C 25 | /596. BD*( 1) C 26 - H 43  | 3.22 1.09 0.053  |
| 48. BD ( 1) C 23 - H 40 | /380. RY*( 1) C 21         | 2.22 1.82 0.057  |
| 48. BD ( 1) C 23 - H 40 | /432. RY*( 1) C 25         | 1.24 1.81 0.043  |
| 48. BD ( 1) C 23 - H 40 | /583. BD*( 1) C 21 - C 22  | 6.02 0.98 0.069  |
| 48. BD ( 1) C 23 - H 40 | /584. BD*( 1) C 21 - C 23  | 1.80 1.17 0.041  |
| 48. BD ( 1) C 23 - H 40 | /593. BD*( 1) C 25 - C 26  | 2.42 1.18 0.048  |
| 49. BD ( 1) C 24 - C 26 | /394. RY*( 2) C 22         | 2.07 1.74 0.054  |
| 49. BD ( 1) C 24 - C 26 | /432. RY*( 1) C 25         | 0.71 1.93 0.033  |
| 49. BD ( 1) C 24 - C 26 | /433. RY*( 2) C 25         | 1.63 2.09 0.052  |
| 49. BD ( 1) C 24 - C 26 | /586. BD*( 1) C 22 - C 24  | 2.86 1.30 0.055  |
| 49. BD ( 1) C 24 - C 26 | /588. BD*( 1) C 22 - H 39  | 3.27 1.09 0.053  |
| 49. BD ( 1) C 24 - C 26 | /592. BD*( 1) C 24 - H 41  | 0.52 1.09 0.021  |
| 49. BD ( 1) C 24 - C 26 | /593. BD*( 1) C 25 - C 26  | 2.81 1.30 0.054  |
| 49. BD ( 1) C 24 - C 26 | /595. BD*( 1) C 25 - H 42  | 3.26 1.09 0.053  |
| 49. BD ( 1) C 24 - C 26 | /596. BD*( 1) C 26 - H 43  | 0.53 1.09 0.021  |

|                         |                           |       |       |       |
|-------------------------|---------------------------|-------|-------|-------|
| 50. BD ( 1) C 24 - H 41 | /393. RY*( 1) C 22        | 1.45  | 1.67  | 0.044 |
| 50. BD ( 1) C 24 - H 41 | /445. RY*( 1) C 26        | 1.26  | 1.81  | 0.043 |
| 50. BD ( 1) C 24 - H 41 | /583. BD*( 1) C 21 - C 22 | 5.51  | 0.98  | 0.066 |
| 50. BD ( 1) C 24 - H 41 | /586. BD*( 1) C 22 - C 24 | 1.35  | 1.18  | 0.036 |
| 50. BD ( 1) C 24 - H 41 | /588. BD*( 1) C 22 - H 39 | 0.85  | 0.97  | 0.026 |
| 50. BD ( 1) C 24 - H 41 | /593. BD*( 1) C 25 - C 26 | 2.52  | 1.18  | 0.049 |
| 51. BD ( 1) C 25 - C 26 | /406. RY*( 1) C 23        | 0.59  | 1.91  | 0.030 |
| 51. BD ( 1) C 25 - C 26 | /407. RY*( 2) C 23        | 1.45  | 1.97  | 0.048 |
| 51. BD ( 1) C 25 - C 26 | /419. RY*( 1) C 24        | 0.88  | 2.03  | 0.038 |
| 51. BD ( 1) C 25 - C 26 | /420. RY*( 2) C 24        | 1.00  | 2.21  | 0.042 |
| 51. BD ( 1) C 25 - C 26 | /589. BD*( 1) C 23 - C 25 | 2.52  | 1.21  | 0.049 |
| 51. BD ( 1) C 25 - C 26 | /590. BD*( 1) C 23 - H 40 | 1.55  | 1.18  | 0.038 |
| 51. BD ( 1) C 25 - C 26 | /591. BD*( 1) C 24 - C 26 | 2.51  | 1.21  | 0.049 |
| 51. BD ( 1) C 25 - C 26 | /592. BD*( 1) C 24 - H 41 | 1.59  | 1.19  | 0.039 |
| 51. BD ( 1) C 25 - C 26 | /595. BD*( 1) C 25 - H 42 | 1.61  | 1.19  | 0.039 |
| 51. BD ( 1) C 25 - C 26 | /596. BD*( 1) C 26 - H 43 | 1.62  | 1.19  | 0.039 |
| 52. BD ( 2) C 25 - C 26 | /408. RY*( 3) C 23        | 1.11  | 0.82  | 0.028 |
| 52. BD ( 2) C 25 - C 26 | /421. RY*( 3) C 24        | 1.36  | 1.08  | 0.036 |
| 52. BD ( 2) C 25 - C 26 | /585. BD*( 2) C 21 - C 23 | 12.94 | 0.31  | 0.057 |
| 52. BD ( 2) C 25 - C 26 | /587. BD*( 2) C 22 - C 24 | 13.29 | 0.31  | 0.058 |
| 53. BD ( 1) C 25 - H 42 | /406. RY*( 1) C 23        | 1.14  | 1.68  | 0.039 |
| 53. BD ( 1) C 25 - H 42 | /445. RY*( 1) C 26        | 1.63  | 1.81  | 0.049 |
| 53. BD ( 1) C 25 - H 42 | /584. BD*( 1) C 21 - C 23 | 2.63  | 1.17  | 0.049 |
| 53. BD ( 1) C 25 - H 42 | /591. BD*( 1) C 24 - C 26 | 5.29  | 0.99  | 0.065 |
| 53. BD ( 1) C 25 - H 42 | /593. BD*( 1) C 25 - C 26 | 1.33  | 1.18  | 0.035 |
| 53. BD ( 1) C 25 - H 42 | /596. BD*( 1) C 26 - H 43 | 0.86  | 0.97  | 0.026 |
| 54. BD ( 1) C 26 - H 43 | /419. RY*( 1) C 24        | 1.32  | 1.80  | 0.044 |
| 54. BD ( 1) C 26 - H 43 | /432. RY*( 1) C 25        | 1.71  | 1.81  | 0.050 |
| 54. BD ( 1) C 26 - H 43 | /586. BD*( 1) C 22 - C 24 | 2.55  | 1.18  | 0.049 |
| 54. BD ( 1) C 26 - H 43 | /589. BD*( 1) C 23 - C 25 | 5.33  | 0.99  | 0.065 |
| 54. BD ( 1) C 26 - H 43 | /593. BD*( 1) C 25 - C 26 | 1.33  | 1.18  | 0.035 |
| 54. BD ( 1) C 26 - H 43 | /595. BD*( 1) C 25 - H 42 | 0.86  | 0.97  | 0.026 |
| 55. CR ( 1) C 1         | /121. RY*( 2) C 2         | 0.95  | 11.45 | 0.093 |
| 55. CR ( 1) C 1         | /134. RY*( 2) C 3         | 1.71  | 11.41 | 0.125 |
| 55. CR ( 1) C 1         | /135. RY*( 3) C 3         | 0.51  | 11.03 | 0.067 |
| 55. CR ( 1) C 1         | /544. BD*( 1) C 1 - C 3   | 1.37  | 10.73 | 0.109 |
| 55. CR ( 1) C 1         | /547. BD*( 1) C 2 - C 4   | 0.57  | 10.77 | 0.070 |
| 55. CR ( 1) C 1         | /550. BD*( 1) C 3 - C 5   | 1.03  | 10.56 | 0.094 |
| 55. CR ( 1) C 1         | /551. BD*( 1) C 3 - C 7   | 1.11  | 10.53 | 0.098 |
| 55. CR ( 1) C 1         | /569. BD*( 1) N 13 - C 14 | 1.03  | 10.47 | 0.095 |
| 56. CR ( 1) C 2         | /108. RY*( 2) C 1         | 1.36  | 11.36 | 0.111 |
| 56. CR ( 1) C 2         | /146. RY*( 1) C 4         | 0.60  | 11.21 | 0.073 |
| 56. CR ( 1) C 2         | /147. RY*( 2) C 4         | 1.75  | 11.21 | 0.125 |
| 56. CR ( 1) C 2         | /544. BD*( 1) C 1 - C 3   | 0.83  | 10.67 | 0.084 |
| 56. CR ( 1) C 2         | /546. BD*( 1) C 1 - N 13  | 0.54  | 10.42 | 0.068 |
| 56. CR ( 1) C 2         | /547. BD*( 1) C 2 - C 4   | 0.83  | 10.71 | 0.084 |
| 56. CR ( 1) C 2         | /552. BD*( 1) C 4 - C 6   | 1.30  | 10.51 | 0.105 |
| 57. CR ( 1) C 3         | /107. RY*( 1) C 1         | 1.16  | 11.27 | 0.102 |
| 57. CR ( 1) C 3         | /109. RY*( 3) C 1         | 0.98  | 11.32 | 0.094 |
| 57. CR ( 1) C 3         | /160. RY*( 2) C 5         | 0.74  | 11.04 | 0.081 |
| 57. CR ( 1) C 3         | /186. RY*( 2) C 7         | 0.60  | 11.51 | 0.074 |
| 57. CR ( 1) C 3         | /191. RY*( 7) C 7         | 0.83  | 11.19 | 0.086 |
| 57. CR ( 1) C 3         | /543. BD*( 1) C 1 - C 2   | 1.09  | 10.52 | 0.096 |
| 57. CR ( 1) C 3         | /544. BD*( 1) C 1 - C 3   | 1.23  | 10.69 | 0.103 |
| 57. CR ( 1) C 3         | /546. BD*( 1) C 1 - N 13  | 1.03  | 10.44 | 0.093 |

|                   |                            |                  |
|-------------------|----------------------------|------------------|
| 57. CR ( 1) C 3   | /554. BD*( 1) C 5 - C 6    | 0.72 10.72 0.079 |
| 57. CR ( 1) C 3   | /558. BD*( 1) C 7 - O 8    | 0.61 10.35 0.073 |
| 58. CR ( 1) C 4   | /121. RY*( 2) C 2          | 1.34 11.39 0.110 |
| 58. CR ( 1) C 4   | /123. RY*( 4) C 2          | 0.65 11.08 0.076 |
| 58. CR ( 1) C 4   | /173. RY*( 2) C 6          | 1.28 10.88 0.106 |
| 58. CR ( 1) C 4   | /175. RY*( 4) C 6          | 0.67 11.13 0.077 |
| 58. CR ( 1) C 4   | /543. BD*( 1) C 1 - C 2    | 1.21 10.49 0.101 |
| 58. CR ( 1) C 4   | /547. BD*( 1) C 2 - C 4    | 0.67 10.70 0.076 |
| 58. CR ( 1) C 4   | /554. BD*( 1) C 5 - C 6    | 0.82 10.70 0.084 |
| 58. CR ( 1) C 4   | /557. BD*( 1) C 6 -Se 11   | 0.82 10.18 0.082 |
| 59. CR ( 1) C 5   | /134. RY*( 2) C 3          | 0.76 11.34 0.083 |
| 59. CR ( 1) C 5   | /172. RY*( 1) C 6          | 1.14 11.12 0.101 |
| 59. CR ( 1) C 5   | /173. RY*( 2) C 6          | 1.84 10.88 0.126 |
| 59. CR ( 1) C 5   | /174. RY*( 3) C 6          | 0.55 10.93 0.069 |
| 59. CR ( 1) C 5   | /544. BD*( 1) C 1 - C 3    | 0.77 10.66 0.081 |
| 59. CR ( 1) C 5   | /551. BD*( 1) C 3 - C 7    | 0.66 10.46 0.075 |
| 59. CR ( 1) C 5   | /552. BD*( 1) C 4 - C 6    | 1.23 10.51 0.102 |
| 59. CR ( 1) C 5   | /554. BD*( 1) C 5 - C 6    | 1.21 10.70 0.102 |
| 59. CR ( 1) C 5   | /557. BD*( 1) C 6 -Se 11   | 1.25 10.18 0.102 |
| 60. CR ( 1) C 6   | /147. RY*( 2) C 4          | 1.02 11.25 0.096 |
| 60. CR ( 1) C 6   | /160. RY*( 2) C 5          | 2.08 11.05 0.136 |
| 60. CR ( 1) C 6   | /162. RY*( 4) C 5          | 0.65 11.16 0.076 |
| 60. CR ( 1) C 6   | /547. BD*( 1) C 2 - C 4    | 0.63 10.74 0.074 |
| 60. CR ( 1) C 6   | /550. BD*( 1) C 3 - C 5    | 1.18 10.53 0.100 |
| 60. CR ( 1) C 6   | /554. BD*( 1) C 5 - C 6    | 1.21 10.73 0.102 |
| 60. CR ( 1) C 6   | /556. BD*( 1) C 5 - H 31   | 0.55 10.54 0.068 |
| 60. CR ( 1) C 6   | /557. BD*( 1) C 6 -Se 11   | 1.28 10.22 0.103 |
| 61. CR ( 1) C 7   | /133. RY*( 1) C 3          | 1.20 12.05 0.108 |
| 61. CR ( 1) C 7   | /544. BD*( 1) C 1 - C 3    | 0.87 10.83 0.087 |
| 61. CR ( 1) C 7   | /550. BD*( 1) C 3 - C 5    | 0.54 10.66 0.068 |
| 61. CR ( 1) C 7   | /551. BD*( 1) C 3 - C 7    | 0.56 10.63 0.069 |
| 61. CR ( 1) C 7   | /558. BD*( 1) C 7 - O 8    | 0.67 10.49 0.077 |
| 61. CR ( 1) C 7   | /561. BD*( 1) O 8 - C 10   | 1.11 10.48 0.096 |
| 62. CR ( 1) O 8   | /185. RY*( 1) C 7          | 1.01 19.92 0.127 |
| 62. CR ( 1) O 8   | /186. RY*( 2) C 7          | 1.11 20.42 0.135 |
| 62. CR ( 1) O 8   | /226. RY*( 3) C 10         | 0.91 19.96 0.121 |
| 63. CR ( 1) O 9   | /185. RY*( 1) C 7          | 5.27 19.81 0.290 |
| 63. CR ( 1) O 9   | /551. BD*( 1) C 3 - C 7    | 0.79 19.29 0.111 |
| 64. CR ( 1) C 10  | /494. RY*( 2) H 34         | 0.60 12.19 0.076 |
| 64. CR ( 1) C 10  | /558. BD*( 1) C 7 - O 8    | 1.10 10.40 0.098 |
| 64. CR ( 1) C 10  | /561. BD*( 1) O 8 - C 10   | 1.49 10.39 0.111 |
| 67. CR ( 3) Se 11 | /172. RY*( 1) C 6          | 0.96 11.34 0.093 |
| 67. CR ( 3) Se 11 | /552. BD*( 1) C 4 - C 6    | 0.76 10.73 0.081 |
| 67. CR ( 3) Se 11 | /554. BD*( 1) C 5 - C 6    | 1.24 10.91 0.104 |
| 79. CR ( 1) C 12  | /380. RY*( 1) C 21         | 0.92 11.39 0.091 |
| 79. CR ( 1) C 12  | /384. RY*( 5) C 21         | 0.61 11.17 0.074 |
| 79. CR ( 1) C 12  | /565. BD*( 1) Se 11 - C 12 | 1.23 10.19 0.100 |
| 79. CR ( 1) C 12  | /583. BD*( 1) C 21 - C 22  | 0.71 10.55 0.078 |
| 79. CR ( 1) C 12  | /584. BD*( 1) C 21 - C 23  | 0.79 10.74 0.083 |
| 80. CR ( 1) N 13  | /107. RY*( 1) C 1          | 1.10 15.41 0.117 |
| 80. CR ( 1) N 13  | /108. RY*( 2) C 1          | 0.54 15.52 0.082 |
| 80. CR ( 1) N 13  | /290. RY*( 2) C 14         | 1.43 15.60 0.133 |
| 80. CR ( 1) N 13  | /544. BD*( 1) C 1 - C 3    | 0.59 14.83 0.084 |
| 81. CR ( 1) C 14  | /303. RY*( 2) C 15         | 0.56 11.28 0.071 |
| 81. CR ( 1) C 14  | /546. BD*( 1) C 1 - N 13   | 1.15 10.56 0.099 |

|                  |                           |                  |
|------------------|---------------------------|------------------|
| 81. CR ( 1) C 14 | /574. BD*( 1) C 15 - C 17 | 0.65 10.81 0.075 |
| 82. CR ( 1) C 15 | /290. RY*( 2) C 14        | 1.07 11.46 0.099 |
| 82. CR ( 1) C 15 | /329. RY*( 2) C 17        | 1.86 11.14 0.129 |
| 82. CR ( 1) C 15 | /330. RY*( 3) C 17        | 0.53 11.25 0.069 |
| 82. CR ( 1) C 15 | /569. BD*( 1) N 13 - C 14 | 0.51 10.44 0.066 |
| 82. CR ( 1) C 15 | /574. BD*( 1) C 15 - C 17 | 0.66 10.70 0.075 |
| 82. CR ( 1) C 15 | /577. BD*( 1) C 17 - C 18 | 1.06 10.50 0.095 |
| 83. CR ( 1) O 16 | /289. RY*( 1) C 14        | 5.52 19.74 0.296 |
| 83. CR ( 1) O 16 | /571. BD*( 1) C 14 - C 15 | 0.75 19.28 0.109 |
| 84. CR ( 1) C 17 | /303. RY*( 2) C 15        | 1.59 11.17 0.119 |
| 84. CR ( 1) C 17 | /304. RY*( 3) C 15        | 0.70 11.38 0.080 |
| 84. CR ( 1) C 17 | /342. RY*( 2) C 18        | 0.78 11.39 0.084 |
| 84. CR ( 1) C 17 | /347. RY*( 7) C 18        | 0.58 11.39 0.072 |
| 84. CR ( 1) C 17 | /571. BD*( 1) C 14 - C 15 | 1.08 10.50 0.096 |
| 84. CR ( 1) C 17 | /574. BD*( 1) C 15 - C 17 | 0.72 10.70 0.079 |
| 84. CR ( 1) C 17 | /576. BD*( 1) C 15 - H 27 | 0.53 10.50 0.067 |
| 85. CR ( 1) C 18 | /329. RY*( 2) C 17        | 0.55 11.28 0.070 |
| 85. CR ( 1) C 18 | /574. BD*( 1) C 15 - C 17 | 0.63 10.84 0.074 |
| 85. CR ( 1) C 18 | /579. BD*( 1) C 18 - O 19 | 0.63 10.51 0.075 |
| 86. CR ( 1) O 19 | /341. RY*( 1) C 18        | 0.80 19.88 0.113 |
| 86. CR ( 1) O 19 | /342. RY*( 2) C 18        | 1.53 20.30 0.158 |
| 86. CR ( 1) O 19 | /344. RY*( 4) C 18        | 0.63 21.26 0.104 |
| 86. CR ( 1) O 19 | /516. RY*( 4) H 38        | 0.56 20.96 0.097 |
| 87. CR ( 1) O 20 | /341. RY*( 1) C 18        | 5.57 19.77 0.298 |
| 87. CR ( 1) O 20 | /577. BD*( 1) C 17 - C 18 | 0.75 19.29 0.109 |
| 88. CR ( 1) C 21 | /265. RY*( 3) C 12        | 0.71 11.16 0.080 |
| 88. CR ( 1) C 21 | /394. RY*( 2) C 22        | 1.10 11.15 0.099 |
| 88. CR ( 1) C 21 | /407. RY*( 2) C 23        | 2.19 11.28 0.141 |
| 88. CR ( 1) C 21 | /584. BD*( 1) C 21 - C 23 | 1.01 10.71 0.093 |
| 88. CR ( 1) C 21 | /586. BD*( 1) C 22 - C 24 | 0.58 10.71 0.071 |
| 88. CR ( 1) C 21 | /589. BD*( 1) C 23 - C 25 | 1.02 10.52 0.093 |
| 88. CR ( 1) C 21 | /590. BD*( 1) C 23 - H 40 | 0.54 10.50 0.068 |
| 89. CR ( 1) C 22 | /381. RY*( 2) C 21        | 1.31 11.17 0.108 |
| 89. CR ( 1) C 22 | /420. RY*( 2) C 24        | 2.12 11.50 0.140 |
| 89. CR ( 1) C 22 | /566. BD*( 1) C 12 - C 21 | 0.75 10.46 0.079 |
| 89. CR ( 1) C 22 | /584. BD*( 1) C 21 - C 23 | 0.76 10.69 0.081 |
| 89. CR ( 1) C 22 | /586. BD*( 1) C 22 - C 24 | 0.76 10.70 0.080 |
| 89. CR ( 1) C 22 | /591. BD*( 1) C 24 - C 26 | 1.06 10.51 0.095 |
| 90. CR ( 1) C 23 | /380. RY*( 1) C 21        | 1.31 11.34 0.109 |
| 90. CR ( 1) C 23 | /381. RY*( 2) C 21        | 1.68 11.17 0.122 |
| 90. CR ( 1) C 23 | /433. RY*( 2) C 25        | 0.79 11.49 0.085 |
| 90. CR ( 1) C 23 | /524. RY*( 2) H 40        | 0.51 12.36 0.071 |
| 90. CR ( 1) C 23 | /566. BD*( 1) C 12 - C 21 | 1.39 10.46 0.108 |
| 90. CR ( 1) C 23 | /583. BD*( 1) C 21 - C 22 | 1.21 10.50 0.101 |
| 90. CR ( 1) C 23 | /584. BD*( 1) C 21 - C 23 | 0.93 10.69 0.090 |
| 90. CR ( 1) C 23 | /593. BD*( 1) C 25 - C 26 | 0.62 10.70 0.073 |
| 91. CR ( 1) C 24 | /393. RY*( 1) C 22        | 0.62 11.20 0.074 |
| 91. CR ( 1) C 24 | /394. RY*( 2) C 22        | 0.85 11.14 0.087 |
| 91. CR ( 1) C 24 | /396. RY*( 4) C 22        | 1.12 11.28 0.101 |
| 91. CR ( 1) C 24 | /446. RY*( 2) C 26        | 0.80 11.48 0.086 |
| 91. CR ( 1) C 24 | /529. RY*( 2) H 41        | 0.56 12.29 0.074 |
| 91. CR ( 1) C 24 | /583. BD*( 1) C 21 - C 22 | 1.19 10.50 0.101 |
| 91. CR ( 1) C 24 | /586. BD*( 1) C 22 - C 24 | 0.79 10.70 0.082 |
| 91. CR ( 1) C 24 | /588. BD*( 1) C 22 - H 39 | 0.51 10.49 0.066 |
| 91. CR ( 1) C 24 | /593. BD*( 1) C 25 - C 26 | 0.63 10.70 0.073 |

|                   |                           |                  |
|-------------------|---------------------------|------------------|
| 92. CR ( 1) C 25  | /410. RY*( 5) C 23        | 0.65 11.15 0.076 |
| 92. CR ( 1) C 25  | /446. RY*( 2) C 26        | 2.11 11.48 0.139 |
| 92. CR ( 1) C 25  | /534. RY*( 2) H 42        | 0.55 12.28 0.073 |
| 92. CR ( 1) C 25  | /584. BD*( 1) C 21 - C 23 | 0.70 10.69 0.077 |
| 92. CR ( 1) C 25  | /591. BD*( 1) C 24 - C 26 | 1.07 10.51 0.095 |
| 92. CR ( 1) C 25  | /593. BD*( 1) C 25 - C 26 | 0.80 10.70 0.083 |
| 92. CR ( 1) C 25  | /596. BD*( 1) C 26 - H 43 | 0.50 10.49 0.065 |
| 93. CR ( 1) C 26  | /420. RY*( 2) C 24        | 0.76 11.51 0.084 |
| 93. CR ( 1) C 26  | /423. RY*( 5) C 24        | 0.50 10.97 0.066 |
| 93. CR ( 1) C 26  | /433. RY*( 2) C 25        | 2.09 11.49 0.139 |
| 93. CR ( 1) C 26  | /539. RY*( 2) H 43        | 0.55 12.28 0.074 |
| 93. CR ( 1) C 26  | /586. BD*( 1) C 22 - C 24 | 0.63 10.70 0.074 |
| 93. CR ( 1) C 26  | /589. BD*( 1) C 23 - C 25 | 1.07 10.51 0.095 |
| 93. CR ( 1) C 26  | /593. BD*( 1) C 25 - C 26 | 0.79 10.70 0.082 |
| 93. CR ( 1) C 26  | /595. BD*( 1) C 25 - H 42 | 0.50 10.49 0.065 |
| 94. LP ( 1) O 8   | /185. RY*( 1) C 7         | 1.66 1.51 0.045  |
| 94. LP ( 1) O 8   | /188. RY*( 4) C 7         | 1.61 2.61 0.058  |
| 94. LP ( 1) O 8   | /224. RY*( 1) C 10        | 1.64 1.65 0.047  |
| 94. LP ( 1) O 8   | /226. RY*( 3) C 10        | 0.79 1.55 0.031  |
| 94. LP ( 1) O 8   | /559. BD*( 1) C 7 - O 9   | 5.70 1.08 0.070  |
| 94. LP ( 1) O 8   | /562. BD*( 1) C 10 - H 32 | 0.63 0.95 0.022  |
| 94. LP ( 1) O 8   | /564. BD*( 1) C 10 - H 34 | 2.37 0.95 0.043  |
| 95. LP ( 2) O 8   | /187. RY*( 3) C 7         | 1.80 1.84 0.054  |
| 95. LP ( 2) O 8   | /225. RY*( 2) C 10        | 1.51 1.50 0.045  |
| 95. LP ( 2) O 8   | /560. BD*( 2) C 7 - O 9   | 38.57 0.31 0.100 |
| 95. LP ( 2) O 8   | /562. BD*( 1) C 10 - H 32 | 5.05 0.70 0.056  |
| 95. LP ( 2) O 8   | /563. BD*( 1) C 10 - H 33 | 5.04 0.70 0.055  |
| 96. LP ( 1) O 9   | /185. RY*( 1) C 7         | 12.35 1.65 0.127 |
| 96. LP ( 1) O 9   | /195. RY*( 11) C 7        | 0.75 5.01 0.055  |
| 96. LP ( 1) O 9   | /551. BD*( 1) C 3 - C 7   | 2.25 1.13 0.045  |
| 96. LP ( 1) O 9   | /558. BD*( 1) C 7 - O 8   | 0.99 0.99 0.029  |
| 97. LP ( 2) O 9   | /186. RY*( 2) C 7         | 1.93 1.70 0.053  |
| 97. LP ( 2) O 9   | /188. RY*( 4) C 7         | 1.71 2.29 0.058  |
| 97. LP ( 2) O 9   | /551. BD*( 1) C 3 - C 7   | 12.44 0.68 0.084 |
| 97. LP ( 2) O 9   | /558. BD*( 1) C 7 - O 8   | 28.86 0.55 0.113 |
| 97. LP ( 2) O 9   | /564. BD*( 1) C 10 - H 34 | 0.80 0.64 0.021  |
| 98. LP ( 1) Se 11 | /172. RY*( 1) C 6         | 1.18 1.78 0.041  |
| 98. LP ( 1) Se 11 | /554. BD*( 1) C 5 - C 6   | 3.32 1.35 0.060  |
| 99. LP ( 2) Se 11 | /552. BD*( 1) C 4 - C 6   | 1.69 0.69 0.031  |
| 99. LP ( 2) Se 11 | /554. BD*( 1) C 5 - C 6   | 1.16 0.87 0.029  |
| 99. LP ( 2) Se 11 | /555. BD*( 2) C 5 - C 6   | 9.14 0.26 0.045  |
| 99. LP ( 2) Se 11 | /567. BD*( 1) C 12 - H 35 | 2.40 0.61 0.035  |
| 99. LP ( 2) Se 11 | /568. BD*( 1) C 12 - H 36 | 3.93 0.61 0.045  |
| 100. LP ( 1) N 13 | /109. RY*( 3) C 1         | 1.10 1.51 0.040  |
| 100. LP ( 1) N 13 | /110. RY*( 4) C 1         | 0.73 1.59 0.033  |
| 100. LP ( 1) N 13 | /291. RY*( 3) C 14        | 1.60 1.73 0.051  |
| 100. LP ( 1) N 13 | /509. RY*( 2) H 37        | 0.75 1.95 0.037  |
| 100. LP ( 1) N 13 | /543. BD*( 1) C 1 - C 2   | 3.65 0.71 0.049  |
| 100. LP ( 1) N 13 | /544. BD*( 1) C 1 - C 3   | 2.68 0.89 0.047  |
| 100. LP ( 1) N 13 | /545. BD*( 2) C 1 - C 3   | 17.63 0.30 0.065 |
| 100. LP ( 1) N 13 | /573. BD*( 2) C 14 - O 16 | 50.66 0.26 0.102 |
| 101. LP ( 1) O 16 | /289. RY*( 1) C 14        | 13.16 1.58 0.129 |
| 101. LP ( 1) O 16 | /569. BD*( 1) N 13 - C 14 | 1.20 1.06 0.032  |
| 101. LP ( 1) O 16 | /571. BD*( 1) C 14 - C 15 | 2.18 1.13 0.045  |
| 102. LP ( 2) O 16 | /290. RY*( 2) C 14        | 1.39 1.64 0.044  |

|                          |                            |                   |
|--------------------------|----------------------------|-------------------|
| 102. LP ( 2) O 16        | /292. RY*( 4) C 14         | 1.82 2.67 0.064   |
| 102. LP ( 2) O 16        | /569. BD*( 1) N 13 - C 14  | 23.94 0.62 0.110  |
| 102. LP ( 2) O 16        | /571. BD*( 1) C 14 - C 15  | 14.74 0.68 0.091  |
| 103. LP ( 1) O 19        | /341. RY*( 1) C 18         | 2.39 1.52 0.054   |
| 103. LP ( 1) O 19        | /344. RY*( 4) C 18         | 1.67 2.90 0.062   |
| 103. LP ( 1) O 19        | /515. RY*( 3) H 38         | 1.30 2.29 0.049   |
| 103. LP ( 1) O 19        | /580. BD*( 1) C 18 - O 20  | 5.36 1.14 0.070   |
| 104. LP ( 2) O 19        | /343. RY*( 3) C 18         | 2.03 1.86 0.057   |
| 104. LP ( 2) O 19        | /514. RY*( 2) H 38         | 1.57 1.81 0.050   |
| 104. LP ( 2) O 19        | /581. BD*( 2) C 18 - O 20  | 40.53 0.32 0.103  |
| 105. LP ( 1) O 20        | /341. RY*( 1) C 18         | 13.29 1.61 0.131  |
| 105. LP ( 1) O 20        | /352. RY*( 12) C 18        | 0.51 4.87 0.045   |
| 105. LP ( 1) O 20        | /577. BD*( 1) C 17 - C 18  | 2.18 1.14 0.045   |
| 105. LP ( 1) O 20        | /579. BD*( 1) C 18 - O 19  | 0.84 1.01 0.026   |
| 106. LP ( 2) O 20        | /342. RY*( 2) C 18         | 2.68 1.59 0.060   |
| 106. LP ( 2) O 20        | /344. RY*( 4) C 18         | 1.04 2.54 0.048   |
| 106. LP ( 2) O 20        | /577. BD*( 1) C 17 - C 18  | 13.34 0.69 0.087  |
| 106. LP ( 2) O 20        | /579. BD*( 1) C 18 - O 19  | 27.86 0.56 0.112  |
| 545. BD*( 2) C 1 - C 3   | /111. RY*( 5) C 1          | 1.03 1.34 0.084   |
| 545. BD*( 2) C 1 - C 3   | /136. RY*( 4) C 3          | 0.91 0.75 0.059   |
| 545. BD*( 2) C 1 - C 3   | /548. BD*( 2) C 2 - C 4    | 119.88 0.01 0.072 |
| 545. BD*( 2) C 1 - C 3   | /558. BD*( 1) C 7 - O 8    | 0.83 0.25 0.028   |
| 545. BD*( 2) C 1 - C 3   | /569. BD*( 1) N 13 - C 14  | 0.69 0.33 0.031   |
| 545. BD*( 2) C 1 - C 3   | /570. BD*( 1) N 13 - H 37  | 0.96 0.31 0.038   |
| 548. BD*( 2) C 2 - C 4   | /122. RY*( 3) C 2          | 0.77 0.68 0.068   |
| 548. BD*( 2) C 2 - C 4   | /150. RY*( 5) C 4          | 0.85 1.36 0.101   |
| 555. BD*( 2) C 5 - C 6   | /161. RY*( 3) C 5          | 2.57 0.54 0.094   |
| 555. BD*( 2) C 5 - C 6   | /174. RY*( 3) C 6          | 0.55 0.85 0.055   |
| 555. BD*( 2) C 5 - C 6   | /565. BD*( 1) Se 11 - C 12 | 1.23 0.07 0.023   |
| 558. BD*( 1) C 7 - O 8   | /186. RY*( 2) C 7          | 1.61 1.15 0.163   |
| 558. BD*( 1) C 7 - O 8   | /198. RY*( 1) O 8          | 0.56 1.05 0.094   |
| 558. BD*( 1) C 7 - O 8   | /550. BD*( 1) C 3 - C 5    | 1.05 0.17 0.046   |
| 558. BD*( 1) C 7 - O 8   | /551. BD*( 1) C 3 - C 7    | 0.80 0.14 0.034   |
| 558. BD*( 1) C 7 - O 8   | /559. BD*( 1) C 7 - O 9    | 0.53 0.22 0.039   |
| 560. BD*( 2) C 7 - O 9   | /187. RY*( 3) C 7          | 1.51 1.53 0.119   |
| 560. BD*( 2) C 7 - O 9   | /212. RY*( 2) O 9          | 1.10 0.98 0.082   |
| 560. BD*( 2) C 7 - O 9   | /545. BD*( 2) C 1 - C 3    | 34.78 0.05 0.068  |
| 573. BD*( 2) C 14 - O 16 | /291. RY*( 3) C 14         | 1.52 1.47 0.107   |
| 573. BD*( 2) C 14 - O 16 | /295. RY*( 7) C 14         | 1.46 1.04 0.089   |
| 573. BD*( 2) C 14 - O 16 | /316. RY*( 2) O 16         | 1.41 1.02 0.087   |
| 573. BD*( 2) C 14 - O 16 | /575. BD*( 2) C 15 - C 17  | 47.13 0.03 0.076  |
| 581. BD*( 2) C 18 - O 20 | /343. RY*( 3) C 18         | 1.60 1.54 0.123   |
| 581. BD*( 2) C 18 - O 20 | /349. RY*( 9) C 18         | 1.00 0.75 0.069   |
| 581. BD*( 2) C 18 - O 20 | /368. RY*( 2) O 20         | 1.01 1.02 0.080   |
| 581. BD*( 2) C 18 - O 20 | /575. BD*( 2) C 15 - C 17  | 29.42 0.04 0.075  |
| 585. BD*( 2) C 21 - C 23 | /383. RY*( 4) C 21         | 0.61 1.47 0.077   |
| 585. BD*( 2) C 21 - C 23 | /408. RY*( 3) C 23         | 2.45 0.50 0.090   |
| 585. BD*( 2) C 21 - C 23 | /557. BD*( 1) C 6 - Se 11  | 0.52 0.08 0.016   |
| 585. BD*( 2) C 21 - C 23 | /565. BD*( 1) Se 11 - C 12 | 4.81 0.05 0.039   |
| 585. BD*( 2) C 21 - C 23 | /567. BD*( 1) C 12 - H 35  | 0.69 0.33 0.037   |
| 587. BD*( 2) C 22 - C 24 | /395. RY*( 3) C 22         | 0.81 0.67 0.065   |
| 587. BD*( 2) C 22 - C 24 | /397. RY*( 5) C 22         | 0.54 1.52 0.081   |
| 587. BD*( 2) C 22 - C 24 | /422. RY*( 4) C 24         | 0.71 1.42 0.090   |
| 594. BD*( 2) C 25 - C 26 | /435. RY*( 4) C 25         | 0.83 1.38 0.094   |
| 594. BD*( 2) C 25 - C 26 | /447. RY*( 3) C 26         | 0.88 0.65 0.066   |

594. BD\*( 2) C 25 - C 26 /448. RY\*( 4) C 26 0.57 1.52 0.081

# NATURAL BOND ORBITAL ANALYSIS:

| Cycle | Thresh. | Occupancies |           | Lewis Structure |     | Low |    | High |      | Dev  |
|-------|---------|-------------|-----------|-----------------|-----|-----|----|------|------|------|
|       |         | Occ.        | -----     | -----           | occ | occ |    |      |      |      |
|       |         | Lewis       | Non-Lewis | CR              | BD  | 3C  | LP | (L)  | (NL) |      |
| 1(1)  | 1.90    | 201.80567   | 10.19433  | 39              | 51  | 0   | 16 | 20   | 14   | 0.81 |
| 2(2)  | 1.90    | 201.80567   | 10.19433  | 39              | 51  | 0   | 16 | 20   | 14   | 0.81 |
| 3(1)  | 1.80    | 203.68901   | 8.31099   | 39              | 48  | 0   | 19 | 7    | 10   | 0.64 |
| 4(2)  | 1.80    | 203.68901   | 8.31099   | 39              | 48  | 0   | 19 | 7    | 10   | 0.64 |
| 5(1)  | 1.70    | 207.62517   | 4.37483   | 39              | 54  | 0   | 13 | 1    | 10   | 0.49 |
| 6(2)  | 1.70    | 208.20560   | 3.79440   | 39              | 54  | 0   | 13 | 1    | 10   | 0.25 |
| 7(3)  | 1.70    | 208.20560   | 3.79440   | 39              | 54  | 0   | 13 | 1    | 10   | 0.25 |
| 8(1)  | 1.60    | 208.21104   | 3.78896   | 39              | 54  | 0   | 13 | 0    | 10   | 0.25 |
| 9(2)  | 1.60    | 208.21104   | 3.78896   | 39              | 54  | 0   | 13 | 0    | 10   | 0.25 |
| 10(1) | 1.50    | 206.90575   | 5.09425   | 39              | 53  | 0   | 14 | 0    | 12   | 0.74 |
| 11(2) | 1.50    | 206.90575   | 5.09425   | 39              | 53  | 0   | 14 | 0    | 12   | 0.74 |
| 12(1) | 1.60    | 208.21104   | 3.78896   | 39              | 54  | 0   | 13 | 0    | 10   | 0.25 |

|                   |                             |
|-------------------|-----------------------------|
| -----             |                             |
| Core              | 77.97695 ( 99.970% of 78)   |
| Valence Lewis     | 130.23409 ( 97.190% of 134) |
| =====             |                             |
| Total Lewis       | 208.21104 ( 98.213% of 212) |
| -----             |                             |
| Valence non-Lewis | 3.40183 ( 1.605% of 212)    |
| Rydberg non-Lewis | 0.38713 ( 0.183% of 212)    |
| =====             |                             |
| Total non-Lewis   | 3.78896 ( 1.787% of 212)    |
| -----             |                             |

## Compound 10

## Second Order Perturbation Theory Analysis of Fock Matrix in NBO Basis

Threshold for printing: 0.50 kcal/mol

| Donor NBO (i)        | Acceptor NBO (j)   | E(2) | E(j)-E(i) | F(i,j) |       |  |
|----------------------|--------------------|------|-----------|--------|-------|--|
|                      |                    |      | kcal/mol  | a.u.   | a.u.  |  |
| =====                |                    |      |           |        |       |  |
| =====                |                    |      |           |        |       |  |
| within unit 1        |                    |      |           |        |       |  |
| 1. BD ( 1) C 1 - C 2 | /134. RY*( 1) C 3  |      | 0.80      | 2.50   | 0.040 |  |
| 1. BD ( 1) C 1 - C 2 | /135. RY*( 2) C 3  |      | 0.67      | 1.95   | 0.033 |  |
| 1. BD ( 1) C 1 - C 2 | /148. RY*( 2) C 4  |      | 2.14      | 1.82   | 0.056 |  |
| 1. BD ( 1) C 1 - C 2 | /277. RY*( 1) N 13 |      | 0.89      | 1.52   | 0.033 |  |

|                       |                           |       |      |       |
|-----------------------|---------------------------|-------|------|-------|
| 1. BD ( 1) C 1 - C 2  | /555. BD*( 1) C 1 - C 3   | 4.22  | 1.27 | 0.065 |
| 1. BD ( 1) C 1 - C 2  | /557. BD*( 1) C 1 - N 13  | 0.58  | 1.03 | 0.022 |
| 1. BD ( 1) C 1 - C 2  | /558. BD*( 1) C 2 - C 4   | 2.95  | 1.31 | 0.056 |
| 1. BD ( 1) C 1 - C 2  | /560. BD*( 1) C 2 - H 25  | 0.62  | 1.10 | 0.023 |
| 1. BD ( 1) C 1 - C 2  | /562. BD*( 1) C 3 - C 7   | 4.39  | 1.07 | 0.062 |
| 1. BD ( 1) C 1 - C 2  | /564. BD*( 1) C 4 - H 26  | 2.83  | 1.10 | 0.050 |
| 1. BD ( 1) C 1 - C 2  | /581. BD*( 1) N 13 - H 33 | 1.59  | 1.00 | 0.036 |
| 2. BD ( 1) C 1 - C 3  | /121. RY*( 1) C 2         | 0.74  | 2.01 | 0.035 |
| 2. BD ( 1) C 1 - C 3  | /160. RY*( 1) C 5         | 0.59  | 1.90 | 0.030 |
| 2. BD ( 1) C 1 - C 3  | /189. RY*( 4) C 7         | 0.58  | 2.79 | 0.036 |
| 2. BD ( 1) C 1 - C 3  | /277. RY*( 1) N 13        | 0.67  | 1.62 | 0.029 |
| 2. BD ( 1) C 1 - C 3  | /554. BD*( 1) C 1 - C 2   | 3.45  | 1.20 | 0.057 |
| 2. BD ( 1) C 1 - C 3  | /557. BD*( 1) C 1 - N 13  | 2.09  | 1.12 | 0.043 |
| 2. BD ( 1) C 1 - C 3  | /560. BD*( 1) C 2 - H 25  | 1.31  | 1.20 | 0.035 |
| 2. BD ( 1) C 1 - C 3  | /561. BD*( 1) C 3 - C 5   | 4.28  | 1.20 | 0.064 |
| 2. BD ( 1) C 1 - C 3  | /562. BD*( 1) C 3 - C 7   | 2.94  | 1.17 | 0.053 |
| 2. BD ( 1) C 1 - C 3  | /567. BD*( 1) C 5 - H 27  | 1.33  | 1.20 | 0.036 |
| 2. BD ( 1) C 1 - C 3  | /570. BD*( 1) C 7 - O 9   | 1.16  | 1.25 | 0.034 |
| 2. BD ( 1) C 1 - C 3  | /580. BD*( 1) N 13 - C 14 | 2.11  | 1.12 | 0.044 |
| 3. BD ( 2) C 1 - C 3  | /123. RY*( 3) C 2         | 1.07  | 1.02 | 0.032 |
| 3. BD ( 2) C 1 - C 3  | /162. RY*( 3) C 5         | 0.87  | 0.86 | 0.026 |
| 3. BD ( 2) C 1 - C 3  | /190. RY*( 5) C 7         | 0.62  | 1.48 | 0.029 |
| 3. BD ( 2) C 1 - C 3  | /559. BD*( 2) C 2 - C 4   | 10.69 | 0.33 | 0.054 |
| 3. BD ( 2) C 1 - C 3  | /566. BD*( 2) C 5 - C 6   | 13.67 | 0.32 | 0.059 |
| 3. BD ( 2) C 1 - C 3  | /569. BD*( 1) C 7 - O 8   | 1.09  | 0.56 | 0.023 |
| 3. BD ( 2) C 1 - C 3  | /571. BD*( 2) C 7 - O 9   | 19.22 | 0.27 | 0.064 |
| 3. BD ( 2) C 1 - C 3  | /580. BD*( 1) N 13 - C 14 | 1.47  | 0.65 | 0.029 |
| 3. BD ( 2) C 1 - C 3  | /581. BD*( 1) N 13 - H 33 | 1.51  | 0.63 | 0.029 |
| 4. BD ( 1) C 1 - N 13 | /121. RY*( 1) C 2         | 0.53  | 2.05 | 0.029 |
| 4. BD ( 1) C 1 - N 13 | /134. RY*( 1) C 3         | 1.36  | 2.63 | 0.054 |
| 4. BD ( 1) C 1 - N 13 | /290. RY*( 1) C 14        | 1.71  | 1.60 | 0.047 |
| 4. BD ( 1) C 1 - N 13 | /554. BD*( 1) C 1 - C 2   | 0.64  | 1.23 | 0.025 |
| 4. BD ( 1) C 1 - N 13 | /555. BD*( 1) C 1 - C 3   | 2.16  | 1.41 | 0.049 |
| 4. BD ( 1) C 1 - N 13 | /558. BD*( 1) C 2 - C 4   | 0.87  | 1.44 | 0.032 |
| 4. BD ( 1) C 1 - N 13 | /561. BD*( 1) C 3 - C 5   | 2.72  | 1.23 | 0.052 |
| 4. BD ( 1) C 1 - N 13 | /580. BD*( 1) N 13 - C 14 | 0.94  | 1.16 | 0.030 |
| 4. BD ( 1) C 1 - N 13 | /584. BD*( 1) C 14 - C 40 | 1.77  | 1.18 | 0.041 |
| 5. BD ( 1) C 2 - C 4  | /108. RY*( 1) C 1         | 1.41  | 1.93 | 0.047 |
| 5. BD ( 1) C 2 - C 4  | /110. RY*( 3) C 1         | 0.92  | 2.02 | 0.039 |
| 5. BD ( 1) C 2 - C 4  | /173. RY*( 1) C 6         | 1.10  | 1.82 | 0.040 |
| 5. BD ( 1) C 2 - C 4  | /554. BD*( 1) C 1 - C 2   | 2.73  | 1.19 | 0.051 |
| 5. BD ( 1) C 2 - C 4  | /557. BD*( 1) C 1 - N 13  | 2.78  | 1.12 | 0.050 |
| 5. BD ( 1) C 2 - C 4  | /560. BD*( 1) C 2 - H 25  | 1.69  | 1.20 | 0.040 |
| 5. BD ( 1) C 2 - C 4  | /563. BD*( 1) C 4 - C 6   | 3.65  | 1.21 | 0.060 |
| 5. BD ( 1) C 2 - C 4  | /564. BD*( 1) C 4 - H 26  | 1.57  | 1.19 | 0.039 |
| 5. BD ( 1) C 2 - C 4  | /568. BD*( 1) C 6 - Se 11 | 3.12  | 0.88 | 0.047 |
| 6. BD ( 2) C 2 - C 4  | /113. RY*( 6) C 1         | 0.63  | 1.82 | 0.032 |
| 6. BD ( 2) C 2 - C 4  | /556. BD*( 2) C 1 - C 3   | 14.35 | 0.31 | 0.061 |
| 6. BD ( 2) C 2 - C 4  | /566. BD*( 2) C 5 - C 6   | 12.94 | 0.31 | 0.057 |
| 7. BD ( 1) C 2 - H 25 | /108. RY*( 1) C 1         | 0.63  | 1.70 | 0.029 |
| 7. BD ( 1) C 2 - H 25 | /109. RY*( 2) C 1         | 0.89  | 1.83 | 0.036 |
| 7. BD ( 1) C 2 - H 25 | /147. RY*( 1) C 4         | 1.44  | 1.68 | 0.044 |
| 7. BD ( 1) C 2 - H 25 | /555. BD*( 1) C 1 - C 3   | 3.21  | 1.14 | 0.054 |
| 7. BD ( 1) C 2 - H 25 | /557. BD*( 1) C 1 - N 13  | 0.60  | 0.89 | 0.021 |
| 7. BD ( 1) C 2 - H 25 | /558. BD*( 1) C 2 - C 4   | 1.58  | 1.18 | 0.039 |

|                        |                            |                  |
|------------------------|----------------------------|------------------|
| 7. BD ( 1) C 2 - H 25  | /563. BD*( 1) C 4 - C 6    | 5.67 0.98 0.067  |
| 7. BD ( 1) C 2 - H 25  | /564. BD*( 1) C 4 - H 26   | 0.94 0.96 0.027  |
| 8. BD ( 1) C 3 - C 5   | /109. RY*( 2) C 1          | 1.21 1.95 0.044  |
| 8. BD ( 1) C 3 - C 5   | /174. RY*( 2) C 6          | 1.45 1.48 0.042  |
| 8. BD ( 1) C 3 - C 5   | /186. RY*( 1) C 7          | 0.99 1.58 0.036  |
| 8. BD ( 1) C 3 - C 5   | /555. BD*( 1) C 1 - C 3    | 4.61 1.26 0.068  |
| 8. BD ( 1) C 3 - C 5   | /557. BD*( 1) C 1 - N 13   | 5.31 1.02 0.066  |
| 8. BD ( 1) C 3 - C 5   | /562. BD*( 1) C 3 - C 7    | 1.68 1.06 0.038  |
| 8. BD ( 1) C 3 - C 5   | /565. BD*( 1) C 5 - C 6    | 3.92 1.29 0.064  |
| 8. BD ( 1) C 3 - C 5   | /567. BD*( 1) C 5 - H 27   | 0.62 1.10 0.023  |
| 8. BD ( 1) C 3 - C 5   | /568. BD*( 1) C 6 - Se 11  | 5.50 0.78 0.059  |
| 8. BD ( 1) C 3 - C 5   | /569. BD*( 1) C 7 - O 8    | 2.85 0.92 0.047  |
| 8. BD ( 1) C 3 - C 5   | /571. BD*( 2) C 7 - O 9    | 0.54 0.63 0.017  |
| 9. BD ( 1) C 3 - C 7   | /108. RY*( 1) C 1          | 0.83 1.87 0.035  |
| 9. BD ( 1) C 3 - C 7   | /109. RY*( 2) C 1          | 1.05 1.99 0.041  |
| 9. BD ( 1) C 3 - C 7   | /160. RY*( 1) C 5          | 1.05 1.83 0.039  |
| 9. BD ( 1) C 3 - C 7   | /212. RY*( 1) O 9          | 0.72 1.81 0.032  |
| 9. BD ( 1) C 3 - C 7   | /554. BD*( 1) C 1 - C 2    | 3.77 1.13 0.058  |
| 9. BD ( 1) C 3 - C 7   | /555. BD*( 1) C 1 - C 3    | 3.98 1.30 0.064  |
| 9. BD ( 1) C 3 - C 7   | /561. BD*( 1) C 3 - C 5    | 1.28 1.13 0.034  |
| 9. BD ( 1) C 3 - C 7   | /565. BD*( 1) C 5 - C 6    | 1.47 1.33 0.040  |
| 9. BD ( 1) C 3 - C 7   | /570. BD*( 1) C 7 - O 9    | 0.95 1.19 0.030  |
| 9. BD ( 1) C 3 - C 7   | /572. BD*( 1) O 8 - C 10   | 2.86 0.95 0.047  |
| 10. BD ( 1) C 4 - C 6  | /121. RY*( 1) C 2          | 0.74 1.93 0.034  |
| 10. BD ( 1) C 4 - C 6  | /122. RY*( 2) C 2          | 1.56 2.00 0.050  |
| 10. BD ( 1) C 4 - C 6  | /160. RY*( 1) C 5          | 0.85 1.82 0.035  |
| 10. BD ( 1) C 4 - C 6  | /161. RY*( 2) C 5          | 0.94 1.63 0.035  |
| 10. BD ( 1) C 4 - C 6  | /558. BD*( 1) C 2 - C 4    | 3.21 1.32 0.058  |
| 10. BD ( 1) C 4 - C 6  | /560. BD*( 1) C 2 - H 25   | 2.68 1.12 0.049  |
| 10. BD ( 1) C 4 - C 6  | /564. BD*( 1) C 4 - H 26   | 0.88 1.11 0.028  |
| 10. BD ( 1) C 4 - C 6  | /565. BD*( 1) C 5 - C 6    | 3.51 1.32 0.061  |
| 10. BD ( 1) C 4 - C 6  | /567. BD*( 1) C 5 - H 27   | 3.42 1.12 0.055  |
| 11. BD ( 1) C 4 - H 26 | /121. RY*( 1) C 2          | 1.52 1.79 0.047  |
| 11. BD ( 1) C 4 - H 26 | /173. RY*( 1) C 6          | 1.13 1.60 0.038  |
| 11. BD ( 1) C 4 - H 26 | /554. BD*( 1) C 1 - C 2    | 5.67 0.97 0.066  |
| 11. BD ( 1) C 4 - H 26 | /558. BD*( 1) C 2 - C 4    | 1.49 1.18 0.038  |
| 11. BD ( 1) C 4 - H 26 | /560. BD*( 1) C 2 - H 25   | 0.95 0.97 0.027  |
| 11. BD ( 1) C 4 - H 26 | /565. BD*( 1) C 5 - C 6    | 3.20 1.17 0.055  |
| 12. BD ( 1) C 5 - C 6  | /134. RY*( 1) C 3          | 1.42 2.60 0.054  |
| 12. BD ( 1) C 5 - C 6  | /135. RY*( 2) C 3          | 0.69 2.06 0.034  |
| 12. BD ( 1) C 5 - C 6  | /147. RY*( 1) C 4          | 1.03 1.92 0.040  |
| 12. BD ( 1) C 5 - C 6  | /561. BD*( 1) C 3 - C 5    | 3.35 1.21 0.057  |
| 12. BD ( 1) C 5 - C 6  | /562. BD*( 1) C 3 - C 7    | 2.04 1.18 0.044  |
| 12. BD ( 1) C 5 - C 6  | /563. BD*( 1) C 4 - C 6    | 3.16 1.23 0.056  |
| 12. BD ( 1) C 5 - C 6  | /564. BD*( 1) C 4 - H 26   | 1.65 1.20 0.040  |
| 12. BD ( 1) C 5 - C 6  | /567. BD*( 1) C 5 - H 27   | 2.30 1.22 0.047  |
| 13. BD ( 2) C 5 - C 6  | /137. RY*( 4) C 3          | 0.65 1.06 0.025  |
| 13. BD ( 2) C 5 - C 6  | /149. RY*( 3) C 4          | 1.69 1.13 0.041  |
| 13. BD ( 2) C 5 - C 6  | /238. RY*( 1) Se 11        | 0.94 0.82 0.026  |
| 13. BD ( 2) C 5 - C 6  | /556. BD*( 2) C 1 - C 3    | 11.77 0.31 0.055 |
| 13. BD ( 2) C 5 - C 6  | /559. BD*( 2) C 2 - C 4    | 13.16 0.32 0.059 |
| 13. BD ( 2) C 5 - C 6  | /576. BD*( 1) Se 11 - C 12 | 0.52 0.39 0.013  |
| 14. BD ( 1) C 5 - H 27 | /134. RY*( 1) C 3          | 1.81 2.36 0.059  |
| 14. BD ( 1) C 5 - H 27 | /173. RY*( 1) C 6          | 1.80 1.59 0.048  |
| 14. BD ( 1) C 5 - H 27 | /555. BD*( 1) C 1 - C 3    | 3.07 1.14 0.053  |

|                          |                           |      |      |       |
|--------------------------|---------------------------|------|------|-------|
| 14. BD ( 1) C 5 - H 27   | /563. BD*( 1) C 4 - C 6   | 6.02 | 0.98 | 0.069 |
| 14. BD ( 1) C 5 - H 27   | /565. BD*( 1) C 5 - C 6   | 2.17 | 1.17 | 0.045 |
| 15. BD ( 1) C 6 -Se 11   | /147. RY*( 1) C 4         | 2.10 | 1.74 | 0.054 |
| 15. BD ( 1) C 6 -Se 11   | /160. RY*( 1) C 5         | 1.69 | 1.73 | 0.049 |
| 15. BD ( 1) C 6 -Se 11   | /265. RY*( 2) C 12        | 0.65 | 1.57 | 0.029 |
| 15. BD ( 1) C 6 -Se 11   | /558. BD*( 1) C 2 - C 4   | 2.67 | 1.24 | 0.052 |
| 15. BD ( 1) C 6 -Se 11   | /561. BD*( 1) C 3 - C 5   | 5.31 | 1.03 | 0.066 |
| 15. BD ( 1) C 6 -Se 11   | /565. BD*( 1) C 5 - C 6   | 1.01 | 1.23 | 0.032 |
| 15. BD ( 1) C 6 -Se 11   | /567. BD*( 1) C 5 - H 27  | 0.94 | 1.04 | 0.028 |
| 15. BD ( 1) C 6 -Se 11   | /577. BD*( 1) C 12 - C 19 | 0.89 | 1.01 | 0.027 |
| 16. BD ( 1) C 7 - O 8    | /135. RY*( 2) C 3         | 1.04 | 2.17 | 0.042 |
| 16. BD ( 1) C 7 - O 8    | /227. RY*( 3) C 10        | 1.05 | 1.83 | 0.039 |
| 16. BD ( 1) C 7 - O 8    | /561. BD*( 1) C 3 - C 5   | 1.27 | 1.32 | 0.037 |
| 16. BD ( 1) C 7 - O 8    | /575. BD*( 1) C 10 - H 30 | 0.66 | 1.24 | 0.026 |
| 17. BD ( 1) C 7 - O 9    | /135. RY*( 2) C 3         | 1.32 | 2.30 | 0.049 |
| 17. BD ( 1) C 7 - O 9    | /186. RY*( 1) C 7         | 1.65 | 1.94 | 0.051 |
| 17. BD ( 1) C 7 - O 9    | /555. BD*( 1) C 1 - C 3   | 1.54 | 1.62 | 0.045 |
| 17. BD ( 1) C 7 - O 9    | /562. BD*( 1) C 3 - C 7   | 1.77 | 1.42 | 0.045 |
| 18. BD ( 2) C 7 - O 9    | /556. BD*( 2) C 1 - C 3   | 4.51 | 0.41 | 0.041 |
| 18. BD ( 2) C 7 - O 9    | /571. BD*( 2) C 7 - O 9   | 0.65 | 0.36 | 0.014 |
| 19. BD ( 1) O 8 - C 10   | /186. RY*( 1) C 7         | 1.27 | 1.77 | 0.042 |
| 19. BD ( 1) O 8 - C 10   | /562. BD*( 1) C 3 - C 7   | 2.60 | 1.26 | 0.052 |
| 20. BD ( 1) C 10 - H 28  | /200. RY*( 2) O 8         | 0.52 | 1.51 | 0.025 |
| 21. BD ( 1) C 10 - H 29  | /200. RY*( 2) O 8         | 0.57 | 1.51 | 0.026 |
| 21. BD ( 1) C 10 - H 29  | /572. BD*( 1) O 8 - C 10  | 0.57 | 0.79 | 0.019 |
| 22. BD ( 1) C 10 - H 30  | /569. BD*( 1) C 7 - O 8   | 3.92 | 0.81 | 0.051 |
| 23. BD ( 1) Se 11 - C 12 | /357. RY*( 3) C 19        | 0.86 | 1.28 | 0.030 |
| 23. BD ( 1) Se 11 - C 12 | /563. BD*( 1) C 4 - C 6   | 1.77 | 1.02 | 0.038 |
| 23. BD ( 1) Se 11 - C 12 | /566. BD*( 2) C 5 - C 6   | 1.03 | 0.59 | 0.023 |
| 23. BD ( 1) Se 11 - C 12 | /591. BD*( 1) C 19 - C 21 | 1.67 | 1.21 | 0.040 |
| 23. BD ( 1) Se 11 - C 12 | /592. BD*( 2) C 19 - C 21 | 4.17 | 0.61 | 0.047 |
| 24. BD ( 1) C 12 - C 19  | /368. RY*( 1) C 20        | 1.62 | 1.81 | 0.049 |
| 24. BD ( 1) C 12 - C 19  | /381. RY*( 1) C 21        | 1.82 | 1.82 | 0.052 |
| 24. BD ( 1) C 12 - C 19  | /578. BD*( 1) C 12 - H 31 | 0.66 | 1.04 | 0.023 |
| 24. BD ( 1) C 12 - C 19  | /579. BD*( 1) C 12 - H 32 | 0.54 | 1.04 | 0.021 |
| 24. BD ( 1) C 12 - C 19  | /590. BD*( 1) C 19 - C 20 | 1.52 | 1.12 | 0.037 |
| 24. BD ( 1) C 12 - C 19  | /591. BD*( 1) C 19 - C 21 | 3.69 | 1.31 | 0.062 |
| 24. BD ( 1) C 12 - C 19  | /593. BD*( 1) C 20 - C 22 | 1.41 | 1.32 | 0.039 |
| 24. BD ( 1) C 12 - C 19  | /596. BD*( 1) C 21 - C 23 | 3.29 | 1.13 | 0.054 |
| 25. BD ( 1) C 12 - H 31  | /357. RY*( 3) C 19        | 0.82 | 1.23 | 0.029 |
| 25. BD ( 1) C 12 - H 31  | /577. BD*( 1) C 12 - C 19 | 0.58 | 0.93 | 0.021 |
| 25. BD ( 1) C 12 - H 31  | /591. BD*( 1) C 19 - C 21 | 2.60 | 1.17 | 0.049 |
| 25. BD ( 1) C 12 - H 31  | /592. BD*( 2) C 19 - C 21 | 3.22 | 0.56 | 0.040 |
| 26. BD ( 1) C 12 - H 32  | /356. RY*( 2) C 19        | 0.67 | 1.65 | 0.030 |
| 26. BD ( 1) C 12 - H 32  | /577. BD*( 1) C 12 - C 19 | 0.51 | 0.94 | 0.020 |
| 26. BD ( 1) C 12 - H 32  | /590. BD*( 1) C 19 - C 20 | 4.84 | 0.98 | 0.062 |
| 27. BD ( 1) N 13 - C 14  | /108. RY*( 1) C 1         | 0.78 | 1.97 | 0.035 |
| 27. BD ( 1) N 13 - C 14  | /109. RY*( 2) C 1         | 0.78 | 2.10 | 0.036 |
| 27. BD ( 1) N 13 - C 14  | /509. RY*( 2) C 40        | 0.91 | 1.58 | 0.034 |
| 27. BD ( 1) N 13 - C 14  | /555. BD*( 1) C 1 - C 3   | 1.62 | 1.41 | 0.043 |
| 27. BD ( 1) N 13 - C 14  | /557. BD*( 1) C 1 - N 13  | 1.13 | 1.17 | 0.032 |
| 27. BD ( 1) N 13 - C 14  | /606. BD*( 1) C 40 - C 43 | 1.10 | 1.15 | 0.032 |
| 28. BD ( 1) N 13 - H 33  | /108. RY*( 1) C 1         | 1.10 | 1.84 | 0.040 |
| 28. BD ( 1) N 13 - H 33  | /291. RY*( 2) C 14        | 0.77 | 2.02 | 0.035 |
| 28. BD ( 1) N 13 - H 33  | /293. RY*( 4) C 14        | 0.94 | 2.90 | 0.047 |

|                         |                            |                 |
|-------------------------|----------------------------|-----------------|
| 28. BD ( 1) N 13 - H 33 | /554. BD*( 1) C 1 - C 2    | 2.09 1.10 0.043 |
| 28. BD ( 1) N 13 - H 33 | /556. BD*( 2) C 1 - C 3    | 1.58 0.68 0.032 |
| 28. BD ( 1) N 13 - H 33 | /582. BD*( 1) C 14 - O 15  | 3.03 1.17 0.053 |
| 29. BD ( 1) C 14 - O 15 | /290. RY*( 1) C 14         | 1.69 1.81 0.050 |
| 29. BD ( 1) C 14 - O 15 | /581. BD*( 1) N 13 - H 33  | 1.20 1.35 0.036 |
| 29. BD ( 1) C 14 - O 15 | /584. BD*( 1) C 14 - C 40  | 1.22 1.40 0.037 |
| 30. BD ( 2) C 14 - O 15 | /583. BD*( 2) C 14 - O 15  | 0.68 0.35 0.015 |
| 30. BD ( 2) C 14 - O 15 | /604. BD*( 1) C 40 - H 41  | 1.76 0.73 0.032 |
| 30. BD ( 2) C 14 - O 15 | /605. BD*( 1) C 40 - H 42  | 1.77 0.73 0.032 |
| 31. BD ( 1) C 14 - C 40 | /278. RY*( 2) N 13         | 1.56 1.74 0.047 |
| 31. BD ( 1) C 14 - C 40 | /303. RY*( 1) O 15         | 0.59 1.84 0.030 |
| 31. BD ( 1) C 14 - C 40 | /531. RY*( 1) C 43         | 1.06 1.48 0.036 |
| 31. BD ( 1) C 14 - C 40 | /557. BD*( 1) C 1 - N 13   | 3.05 1.04 0.050 |
| 31. BD ( 1) C 14 - C 40 | /582. BD*( 1) C 14 - O 15  | 0.76 1.19 0.027 |
| 31. BD ( 1) C 14 - C 40 | /588. BD*( 1) C 16 - C 43  | 1.80 1.05 0.039 |
| 31. BD ( 1) C 14 - C 40 | /606. BD*( 1) C 40 - C 43  | 0.75 1.03 0.025 |
| 32. BD ( 1) C 16 - O 17 | /532. RY*( 2) C 43         | 0.62 1.64 0.028 |
| 32. BD ( 1) C 16 - O 17 | /606. BD*( 1) C 40 - C 43  | 0.99 1.27 0.032 |
| 33. BD ( 1) C 16 - O 18 | /316. RY*( 1) C 16         | 1.59 1.80 0.048 |
| 33. BD ( 1) C 16 - O 18 | /588. BD*( 1) C 16 - C 43  | 1.08 1.39 0.035 |
| 34. BD ( 2) C 16 - O 18 | /587. BD*( 2) C 16 - O 18  | 0.75 0.36 0.015 |
| 34. BD ( 2) C 16 - O 18 | /607. BD*( 1) C 43 - H 44  | 1.73 0.75 0.032 |
| 34. BD ( 2) C 16 - O 18 | /608. BD*( 1) C 43 - H 45  | 1.75 0.75 0.032 |
| 35. BD ( 1) C 16 - C 43 | /342. RY*( 1) O 18         | 0.76 1.78 0.033 |
| 35. BD ( 1) C 16 - C 43 | /508. RY*( 1) C 40         | 1.13 1.43 0.036 |
| 35. BD ( 1) C 16 - C 43 | /584. BD*( 1) C 14 - C 40  | 1.76 1.07 0.039 |
| 35. BD ( 1) C 16 - C 43 | /586. BD*( 1) C 16 - O 18  | 0.57 1.19 0.023 |
| 35. BD ( 1) C 16 - C 43 | /589. BD*( 1) O 17 - H 34  | 1.84 0.98 0.038 |
| 35. BD ( 1) C 16 - C 43 | /606. BD*( 1) C 40 - C 43  | 0.53 1.04 0.021 |
| 36. BD ( 1) O 17 - H 34 | /316. RY*( 1) C 16         | 1.04 1.52 0.036 |
| 36. BD ( 1) O 17 - H 34 | /317. RY*( 2) C 16         | 1.01 1.96 0.040 |
| 36. BD ( 1) O 17 - H 34 | /322. RY*( 7) C 16         | 0.59 2.42 0.034 |
| 36. BD ( 1) O 17 - H 34 | /586. BD*( 1) C 16 - O 18  | 1.30 1.24 0.036 |
| 36. BD ( 1) O 17 - H 34 | /588. BD*( 1) C 16 - C 43  | 3.73 1.11 0.058 |
| 37. BD ( 1) C 19 - C 20 | /264. RY*( 1) C 12         | 1.25 1.31 0.036 |
| 37. BD ( 1) C 19 - C 20 | /381. RY*( 1) C 21         | 0.93 1.81 0.037 |
| 37. BD ( 1) C 19 - C 20 | /394. RY*( 1) C 22         | 0.90 1.92 0.037 |
| 37. BD ( 1) C 19 - C 20 | /395. RY*( 2) C 22         | 1.68 2.10 0.053 |
| 37. BD ( 1) C 19 - C 20 | /577. BD*( 1) C 12 - C 19  | 1.52 1.06 0.036 |
| 37. BD ( 1) C 19 - C 20 | /579. BD*( 1) C 12 - H 32  | 1.12 1.02 0.030 |
| 37. BD ( 1) C 19 - C 20 | /591. BD*( 1) C 19 - C 21  | 3.66 1.29 0.061 |
| 37. BD ( 1) C 19 - C 20 | /593. BD*( 1) C 20 - C 22  | 3.18 1.30 0.058 |
| 37. BD ( 1) C 19 - C 20 | /595. BD*( 1) C 20 - H 35  | 0.61 1.09 0.023 |
| 37. BD ( 1) C 19 - C 20 | /597. BD*( 1) C 21 - H 36  | 3.35 1.08 0.054 |
| 37. BD ( 1) C 19 - C 20 | /599. BD*( 1) C 22 - H 37  | 2.99 1.09 0.051 |
| 38. BD ( 1) C 19 - C 21 | /264. RY*( 1) C 12         | 0.91 1.40 0.032 |
| 38. BD ( 1) C 19 - C 21 | /368. RY*( 1) C 20         | 0.81 1.89 0.035 |
| 38. BD ( 1) C 19 - C 21 | /407. RY*( 1) C 23         | 0.98 2.03 0.040 |
| 38. BD ( 1) C 19 - C 21 | /408. RY*( 2) C 23         | 1.06 2.19 0.043 |
| 38. BD ( 1) C 19 - C 21 | /576. BD*( 1) Se 11 - C 12 | 0.84 0.84 0.024 |
| 38. BD ( 1) C 19 - C 21 | /577. BD*( 1) C 12 - C 19  | 3.53 1.16 0.057 |
| 38. BD ( 1) C 19 - C 21 | /590. BD*( 1) C 19 - C 20  | 3.49 1.20 0.058 |
| 38. BD ( 1) C 19 - C 21 | /595. BD*( 1) C 20 - H 35  | 1.56 1.19 0.039 |
| 38. BD ( 1) C 19 - C 21 | /596. BD*( 1) C 21 - C 23  | 2.95 1.21 0.053 |
| 38. BD ( 1) C 19 - C 21 | /597. BD*( 1) C 21 - H 36  | 1.81 1.18 0.041 |

|                         |                            |                  |
|-------------------------|----------------------------|------------------|
| 38. BD ( 1) C 19 - C 21 | /602. BD*( 1) C 23 - H 38  | 1.39 1.19 0.036  |
| 39. BD ( 2) C 19 - C 21 | /370. RY*( 3) C 20         | 1.47 0.98 0.036  |
| 39. BD ( 2) C 19 - C 21 | /409. RY*( 3) C 23         | 1.38 1.12 0.037  |
| 39. BD ( 2) C 19 - C 21 | /576. BD*( 1) Se 11 - C 12 | 4.52 0.37 0.038  |
| 39. BD ( 2) C 19 - C 21 | /578. BD*( 1) C 12 - H 31  | 2.68 0.65 0.039  |
| 39. BD ( 2) C 19 - C 21 | /594. BD*( 2) C 20 - C 22  | 12.42 0.32 0.056 |
| 39. BD ( 2) C 19 - C 21 | /601. BD*( 2) C 23 - C 24  | 13.29 0.32 0.058 |
| 40. BD ( 1) C 20 - C 22 | /355. RY*( 1) C 19         | 1.41 2.04 0.048  |
| 40. BD ( 1) C 20 - C 22 | /356. RY*( 2) C 19         | 0.78 1.88 0.034  |
| 40. BD ( 1) C 20 - C 22 | /420. RY*( 1) C 24         | 0.87 2.03 0.038  |
| 40. BD ( 1) C 20 - C 22 | /421. RY*( 2) C 24         | 0.96 2.18 0.041  |
| 40. BD ( 1) C 20 - C 22 | /577. BD*( 1) C 12 - C 19  | 2.68 1.16 0.050  |
| 40. BD ( 1) C 20 - C 22 | /590. BD*( 1) C 19 - C 20  | 3.18 1.20 0.055  |
| 40. BD ( 1) C 20 - C 22 | /595. BD*( 1) C 20 - H 35  | 1.63 1.19 0.039  |
| 40. BD ( 1) C 20 - C 22 | /598. BD*( 1) C 22 - C 24  | 2.55 1.21 0.050  |
| 40. BD ( 1) C 20 - C 22 | /599. BD*( 1) C 22 - H 37  | 1.62 1.19 0.039  |
| 40. BD ( 1) C 20 - C 22 | /603. BD*( 1) C 24 - H 39  | 1.56 1.19 0.038  |
| 41. BD ( 2) C 20 - C 22 | /422. RY*( 3) C 24         | 1.43 0.96 0.035  |
| 41. BD ( 2) C 20 - C 22 | /592. BD*( 2) C 19 - C 21  | 13.87 0.32 0.059 |
| 41. BD ( 2) C 20 - C 22 | /601. BD*( 2) C 23 - C 24  | 13.18 0.31 0.058 |
| 42. BD ( 1) C 20 - H 35 | /355. RY*( 1) C 19         | 1.57 1.82 0.048  |
| 42. BD ( 1) C 20 - H 35 | /394. RY*( 1) C 22         | 1.59 1.80 0.048  |
| 42. BD ( 1) C 20 - H 35 | /591. BD*( 1) C 19 - C 21  | 3.17 1.17 0.054  |
| 42. BD ( 1) C 20 - H 35 | /593. BD*( 1) C 20 - C 22  | 1.45 1.18 0.037  |
| 42. BD ( 1) C 20 - H 35 | /598. BD*( 1) C 22 - C 24  | 5.18 0.99 0.064  |
| 42. BD ( 1) C 20 - H 35 | /599. BD*( 1) C 22 - H 37  | 0.86 0.97 0.026  |
| 43. BD ( 1) C 21 - C 23 | /356. RY*( 2) C 19         | 1.77 1.77 0.050  |
| 43. BD ( 1) C 21 - C 23 | /420. RY*( 1) C 24         | 0.70 1.93 0.033  |
| 43. BD ( 1) C 21 - C 23 | /421. RY*( 2) C 24         | 1.60 2.08 0.052  |
| 43. BD ( 1) C 21 - C 23 | /577. BD*( 1) C 12 - C 19  | 5.17 1.06 0.066  |
| 43. BD ( 1) C 21 - C 23 | /591. BD*( 1) C 19 - C 21  | 3.49 1.29 0.060  |
| 43. BD ( 1) C 21 - C 23 | /600. BD*( 1) C 23 - C 24  | 2.81 1.30 0.054  |
| 43. BD ( 1) C 21 - C 23 | /602. BD*( 1) C 23 - H 38  | 0.52 1.09 0.021  |
| 43. BD ( 1) C 21 - C 23 | /603. BD*( 1) C 24 - H 39  | 3.22 1.09 0.053  |
| 44. BD ( 1) C 21 - H 36 | /355. RY*( 1) C 19         | 2.22 1.82 0.057  |
| 44. BD ( 1) C 21 - H 36 | /407. RY*( 1) C 23         | 1.24 1.81 0.042  |
| 44. BD ( 1) C 21 - H 36 | /590. BD*( 1) C 19 - C 20  | 6.01 0.98 0.069  |
| 44. BD ( 1) C 21 - H 36 | /591. BD*( 1) C 19 - C 21  | 1.80 1.17 0.041  |
| 44. BD ( 1) C 21 - H 36 | /600. BD*( 1) C 23 - C 24  | 2.42 1.18 0.048  |
| 45. BD ( 1) C 22 - C 24 | /369. RY*( 2) C 20         | 2.07 1.73 0.054  |
| 45. BD ( 1) C 22 - C 24 | /407. RY*( 1) C 23         | 0.71 1.93 0.033  |
| 45. BD ( 1) C 22 - C 24 | /408. RY*( 2) C 23         | 1.63 2.09 0.052  |
| 45. BD ( 1) C 22 - C 24 | /593. BD*( 1) C 20 - C 22  | 2.86 1.30 0.055  |
| 45. BD ( 1) C 22 - C 24 | /595. BD*( 1) C 20 - H 35  | 3.27 1.09 0.053  |
| 45. BD ( 1) C 22 - C 24 | /599. BD*( 1) C 22 - H 37  | 0.52 1.09 0.021  |
| 45. BD ( 1) C 22 - C 24 | /600. BD*( 1) C 23 - C 24  | 2.81 1.30 0.054  |
| 45. BD ( 1) C 22 - C 24 | /602. BD*( 1) C 23 - H 38  | 3.26 1.09 0.053  |
| 45. BD ( 1) C 22 - C 24 | /603. BD*( 1) C 24 - H 39  | 0.53 1.09 0.021  |
| 46. BD ( 1) C 22 - H 37 | /368. RY*( 1) C 20         | 1.45 1.67 0.044  |
| 46. BD ( 1) C 22 - H 37 | /420. RY*( 1) C 24         | 1.26 1.81 0.043  |
| 46. BD ( 1) C 22 - H 37 | /590. BD*( 1) C 19 - C 20  | 5.51 0.98 0.066  |
| 46. BD ( 1) C 22 - H 37 | /593. BD*( 1) C 20 - C 22  | 1.35 1.18 0.036  |
| 46. BD ( 1) C 22 - H 37 | /595. BD*( 1) C 20 - H 35  | 0.85 0.97 0.026  |
| 46. BD ( 1) C 22 - H 37 | /600. BD*( 1) C 23 - C 24  | 2.52 1.18 0.049  |
| 47. BD ( 1) C 23 - C 24 | /381. RY*( 1) C 21         | 0.59 1.91 0.030  |

|                         |                           |                  |
|-------------------------|---------------------------|------------------|
| 47. BD ( 1) C 23 - C 24 | /382. RY*( 2) C 21        | 1.45 1.97 0.048  |
| 47. BD ( 1) C 23 - C 24 | /394. RY*( 1) C 22        | 0.88 2.03 0.038  |
| 47. BD ( 1) C 23 - C 24 | /395. RY*( 2) C 22        | 1.00 2.21 0.042  |
| 47. BD ( 1) C 23 - C 24 | /596. BD*( 1) C 21 - C 23 | 2.52 1.21 0.049  |
| 47. BD ( 1) C 23 - C 24 | /597. BD*( 1) C 21 - H 36 | 1.55 1.18 0.038  |
| 47. BD ( 1) C 23 - C 24 | /598. BD*( 1) C 22 - C 24 | 2.52 1.21 0.049  |
| 47. BD ( 1) C 23 - C 24 | /599. BD*( 1) C 22 - H 37 | 1.59 1.19 0.039  |
| 47. BD ( 1) C 23 - C 24 | /602. BD*( 1) C 23 - H 38 | 1.61 1.19 0.039  |
| 47. BD ( 1) C 23 - C 24 | /603. BD*( 1) C 24 - H 39 | 1.62 1.19 0.039  |
| 48. BD ( 2) C 23 - C 24 | /383. RY*( 3) C 21        | 1.12 0.82 0.029  |
| 48. BD ( 2) C 23 - C 24 | /396. RY*( 3) C 22        | 1.36 1.08 0.036  |
| 48. BD ( 2) C 23 - C 24 | /592. BD*( 2) C 19 - C 21 | 12.91 0.31 0.057 |
| 48. BD ( 2) C 23 - C 24 | /594. BD*( 2) C 20 - C 22 | 13.29 0.31 0.058 |
| 49. BD ( 1) C 23 - H 38 | /381. RY*( 1) C 21        | 1.15 1.69 0.039  |
| 49. BD ( 1) C 23 - H 38 | /420. RY*( 1) C 24        | 1.63 1.81 0.049  |
| 49. BD ( 1) C 23 - H 38 | /591. BD*( 1) C 19 - C 21 | 2.63 1.17 0.049  |
| 49. BD ( 1) C 23 - H 38 | /598. BD*( 1) C 22 - C 24 | 5.29 0.99 0.065  |
| 49. BD ( 1) C 23 - H 38 | /600. BD*( 1) C 23 - C 24 | 1.33 1.18 0.035  |
| 49. BD ( 1) C 23 - H 38 | /603. BD*( 1) C 24 - H 39 | 0.86 0.97 0.026  |
| 50. BD ( 1) C 24 - H 39 | /394. RY*( 1) C 22        | 1.32 1.80 0.044  |
| 50. BD ( 1) C 24 - H 39 | /407. RY*( 1) C 23        | 1.71 1.81 0.050  |
| 50. BD ( 1) C 24 - H 39 | /593. BD*( 1) C 20 - C 22 | 2.54 1.18 0.049  |
| 50. BD ( 1) C 24 - H 39 | /596. BD*( 1) C 21 - C 23 | 5.32 0.99 0.065  |
| 50. BD ( 1) C 24 - H 39 | /600. BD*( 1) C 23 - C 24 | 1.33 1.18 0.035  |
| 50. BD ( 1) C 24 - H 39 | /602. BD*( 1) C 23 - H 38 | 0.86 0.97 0.026  |
| 51. BD ( 1) C 40 - H 41 | /533. RY*( 3) C 43        | 0.52 1.23 0.023  |
| 51. BD ( 1) C 40 - H 41 | /582. BD*( 1) C 14 - O 15 | 2.24 1.03 0.043  |
| 51. BD ( 1) C 40 - H 41 | /583. BD*( 2) C 14 - O 15 | 4.74 0.50 0.046  |
| 51. BD ( 1) C 40 - H 41 | /607. BD*( 1) C 43 - H 44 | 2.69 0.88 0.044  |
| 52. BD ( 1) C 40 - H 42 | /533. RY*( 3) C 43        | 0.51 1.23 0.022  |
| 52. BD ( 1) C 40 - H 42 | /582. BD*( 1) C 14 - O 15 | 1.82 1.03 0.039  |
| 52. BD ( 1) C 40 - H 42 | /583. BD*( 2) C 14 - O 15 | 5.76 0.50 0.051  |
| 52. BD ( 1) C 40 - H 42 | /608. BD*( 1) C 43 - H 45 | 2.67 0.88 0.043  |
| 53. BD ( 1) C 40 - C 43 | /290. RY*( 1) C 14        | 1.35 1.44 0.039  |
| 53. BD ( 1) C 40 - C 43 | /316. RY*( 1) C 16        | 1.40 1.42 0.040  |
| 53. BD ( 1) C 40 - C 43 | /580. BD*( 1) N 13 - C 14 | 3.80 1.00 0.056  |
| 53. BD ( 1) C 40 - C 43 | /584. BD*( 1) C 14 - C 40 | 0.97 1.02 0.028  |
| 53. BD ( 1) C 40 - C 43 | /585. BD*( 1) C 16 - O 17 | 3.86 0.92 0.054  |
| 53. BD ( 1) C 40 - C 43 | /588. BD*( 1) C 16 - C 43 | 0.72 1.01 0.024  |
| 53. BD ( 1) C 40 - C 43 | /604. BD*( 1) C 40 - H 41 | 0.52 1.00 0.020  |
| 53. BD ( 1) C 40 - C 43 | /605. BD*( 1) C 40 - H 42 | 0.53 1.00 0.020  |
| 53. BD ( 1) C 40 - C 43 | /607. BD*( 1) C 43 - H 44 | 0.52 1.00 0.020  |
| 53. BD ( 1) C 40 - C 43 | /608. BD*( 1) C 43 - H 45 | 0.51 1.00 0.020  |
| 54. BD ( 1) C 43 - H 44 | /320. RY*( 5) C 16        | 0.54 1.59 0.026  |
| 54. BD ( 1) C 43 - H 44 | /510. RY*( 3) C 40        | 0.51 1.26 0.023  |
| 54. BD ( 1) C 43 - H 44 | /586. BD*( 1) C 16 - O 18 | 1.88 1.02 0.039  |
| 54. BD ( 1) C 43 - H 44 | /587. BD*( 2) C 16 - O 18 | 5.49 0.49 0.048  |
| 54. BD ( 1) C 43 - H 44 | /604. BD*( 1) C 40 - H 41 | 2.81 0.87 0.044  |
| 55. BD ( 1) C 43 - H 45 | /510. RY*( 3) C 40        | 0.50 1.26 0.023  |
| 55. BD ( 1) C 43 - H 45 | /586. BD*( 1) C 16 - O 18 | 1.86 1.02 0.039  |
| 55. BD ( 1) C 43 - H 45 | /587. BD*( 2) C 16 - O 18 | 5.48 0.49 0.048  |
| 55. BD ( 1) C 43 - H 45 | /605. BD*( 1) C 40 - H 42 | 2.81 0.87 0.044  |
| 56. CR ( 1) C 1         | /122. RY*( 2) C 2         | 0.95 11.44 0.093 |
| 56. CR ( 1) C 1         | /134. RY*( 1) C 3         | 0.52 11.95 0.070 |
| 56. CR ( 1) C 1         | /135. RY*( 2) C 3         | 1.70 11.41 0.125 |

|                 |                           |                  |
|-----------------|---------------------------|------------------|
| 56. CR ( 1) C 1 | /136. RY*( 3) C 3         | 0.50 11.02 0.066 |
| 56. CR ( 1) C 1 | /555. BD*( 1) C 1 - C 3   | 1.36 10.73 0.109 |
| 56. CR ( 1) C 1 | /558. BD*( 1) C 2 - C 4   | 0.57 10.77 0.070 |
| 56. CR ( 1) C 1 | /561. BD*( 1) C 3 - C 5   | 1.03 10.56 0.094 |
| 56. CR ( 1) C 1 | /562. BD*( 1) C 3 - C 7   | 1.11 10.53 0.098 |
| 56. CR ( 1) C 1 | /580. BD*( 1) N 13 - C 14 | 1.04 10.48 0.095 |
| 57. CR ( 1) C 2 | /109. RY*( 2) C 1         | 1.36 11.36 0.111 |
| 57. CR ( 1) C 2 | /147. RY*( 1) C 4         | 0.60 11.21 0.073 |
| 57. CR ( 1) C 2 | /148. RY*( 2) C 4         | 1.75 11.21 0.125 |
| 57. CR ( 1) C 2 | /555. BD*( 1) C 1 - C 3   | 0.83 10.67 0.084 |
| 57. CR ( 1) C 2 | /557. BD*( 1) C 1 - N 13  | 0.54 10.42 0.067 |
| 57. CR ( 1) C 2 | /558. BD*( 1) C 2 - C 4   | 0.83 10.70 0.084 |
| 57. CR ( 1) C 2 | /563. BD*( 1) C 4 - C 6   | 1.30 10.51 0.105 |
| 58. CR ( 1) C 3 | /108. RY*( 1) C 1         | 1.14 11.25 0.101 |
| 58. CR ( 1) C 3 | /110. RY*( 3) C 1         | 1.02 11.34 0.096 |
| 58. CR ( 1) C 3 | /161. RY*( 2) C 5         | 0.74 11.04 0.081 |
| 58. CR ( 1) C 3 | /187. RY*( 2) C 7         | 0.60 11.50 0.074 |
| 58. CR ( 1) C 3 | /192. RY*( 7) C 7         | 0.83 11.19 0.086 |
| 58. CR ( 1) C 3 | /554. BD*( 1) C 1 - C 2   | 1.09 10.52 0.096 |
| 58. CR ( 1) C 3 | /555. BD*( 1) C 1 - C 3   | 1.24 10.69 0.103 |
| 58. CR ( 1) C 3 | /557. BD*( 1) C 1 - N 13  | 1.02 10.45 0.093 |
| 58. CR ( 1) C 3 | /565. BD*( 1) C 5 - C 6   | 0.72 10.72 0.079 |
| 58. CR ( 1) C 3 | /569. BD*( 1) C 7 - O 8   | 0.61 10.35 0.073 |
| 59. CR ( 1) C 4 | /122. RY*( 2) C 2         | 1.29 11.37 0.108 |
| 59. CR ( 1) C 4 | /124. RY*( 4) C 2         | 0.68 11.05 0.078 |
| 59. CR ( 1) C 4 | /174. RY*( 2) C 6         | 1.29 10.88 0.106 |
| 59. CR ( 1) C 4 | /176. RY*( 4) C 6         | 0.66 11.13 0.076 |
| 59. CR ( 1) C 4 | /554. BD*( 1) C 1 - C 2   | 1.20 10.49 0.101 |
| 59. CR ( 1) C 4 | /558. BD*( 1) C 2 - C 4   | 0.67 10.70 0.076 |
| 59. CR ( 1) C 4 | /565. BD*( 1) C 5 - C 6   | 0.83 10.70 0.084 |
| 59. CR ( 1) C 4 | /568. BD*( 1) C 6 -Se 11  | 0.82 10.18 0.082 |
| 60. CR ( 1) C 5 | /135. RY*( 2) C 3         | 0.78 11.35 0.084 |
| 60. CR ( 1) C 5 | /173. RY*( 1) C 6         | 1.14 11.12 0.101 |
| 60. CR ( 1) C 5 | /174. RY*( 2) C 6         | 1.85 10.88 0.127 |
| 60. CR ( 1) C 5 | /175. RY*( 3) C 6         | 0.54 10.93 0.069 |
| 60. CR ( 1) C 5 | /555. BD*( 1) C 1 - C 3   | 0.76 10.67 0.081 |
| 60. CR ( 1) C 5 | /562. BD*( 1) C 3 - C 7   | 0.66 10.46 0.075 |
| 60. CR ( 1) C 5 | /563. BD*( 1) C 4 - C 6   | 1.23 10.51 0.102 |
| 60. CR ( 1) C 5 | /565. BD*( 1) C 5 - C 6   | 1.21 10.70 0.102 |
| 60. CR ( 1) C 5 | /568. BD*( 1) C 6 -Se 11  | 1.26 10.18 0.102 |
| 61. CR ( 1) C 6 | /148. RY*( 2) C 4         | 1.02 11.25 0.096 |
| 61. CR ( 1) C 6 | /161. RY*( 2) C 5         | 2.09 11.05 0.136 |
| 61. CR ( 1) C 6 | /163. RY*( 4) C 5         | 0.65 11.16 0.076 |
| 61. CR ( 1) C 6 | /558. BD*( 1) C 2 - C 4   | 0.63 10.74 0.074 |
| 61. CR ( 1) C 6 | /561. BD*( 1) C 3 - C 5   | 1.18 10.53 0.100 |
| 61. CR ( 1) C 6 | /565. BD*( 1) C 5 - C 6   | 1.22 10.73 0.103 |
| 61. CR ( 1) C 6 | /567. BD*( 1) C 5 - H 27  | 0.56 10.54 0.069 |
| 61. CR ( 1) C 6 | /568. BD*( 1) C 6 -Se 11  | 1.29 10.22 0.103 |
| 62. CR ( 1) C 7 | /134. RY*( 1) C 3         | 1.20 12.05 0.107 |
| 62. CR ( 1) C 7 | /555. BD*( 1) C 1 - C 3   | 0.87 10.83 0.087 |
| 62. CR ( 1) C 7 | /561. BD*( 1) C 3 - C 5   | 0.54 10.66 0.068 |
| 62. CR ( 1) C 7 | /562. BD*( 1) C 3 - C 7   | 0.56 10.63 0.070 |
| 62. CR ( 1) C 7 | /569. BD*( 1) C 7 - O 8   | 0.68 10.49 0.077 |
| 62. CR ( 1) C 7 | /572. BD*( 1) O 8 - C 10  | 1.11 10.48 0.097 |
| 63. CR ( 1) O 8 | /186. RY*( 1) C 7         | 1.01 19.92 0.127 |

|                   |                            |                  |
|-------------------|----------------------------|------------------|
| 63. CR ( 1) O 8   | /187. RY*( 2) C 7          | 1.12 20.41 0.135 |
| 63. CR ( 1) O 8   | /227. RY*( 3) C 10         | 0.88 19.95 0.118 |
| 64. CR ( 1) O 9   | /186. RY*( 1) C 7          | 5.28 19.81 0.290 |
| 64. CR ( 1) O 9   | /562. BD*( 1) C 3 - C 7    | 0.78 19.29 0.111 |
| 65. CR ( 1) C 10  | /459. RY*( 2) H 30         | 0.53 12.15 0.072 |
| 65. CR ( 1) C 10  | /569. BD*( 1) C 7 - O 8    | 1.10 10.40 0.098 |
| 65. CR ( 1) C 10  | /572. BD*( 1) O 8 - C 10   | 1.48 10.39 0.111 |
| 68. CR ( 3) Se 11 | /173. RY*( 1) C 6          | 0.96 11.34 0.093 |
| 68. CR ( 3) Se 11 | /563. BD*( 1) C 4 - C 6    | 0.76 10.73 0.081 |
| 68. CR ( 3) Se 11 | /565. BD*( 1) C 5 - C 6    | 1.23 10.91 0.104 |
| 80. CR ( 1) C 12  | /355. RY*( 1) C 19         | 0.92 11.39 0.091 |
| 80. CR ( 1) C 12  | /359. RY*( 5) C 19         | 0.60 11.18 0.073 |
| 80. CR ( 1) C 12  | /576. BD*( 1) Se 11 - C 12 | 1.22 10.19 0.100 |
| 80. CR ( 1) C 12  | /590. BD*( 1) C 19 - C 20  | 0.71 10.55 0.078 |
| 80. CR ( 1) C 12  | /591. BD*( 1) C 19 - C 21  | 0.79 10.74 0.083 |
| 81. CR ( 1) N 13  | /108. RY*( 1) C 1          | 1.10 15.39 0.117 |
| 81. CR ( 1) N 13  | /109. RY*( 2) C 1          | 0.55 15.52 0.083 |
| 81. CR ( 1) N 13  | /291. RY*( 2) C 14         | 1.54 15.57 0.139 |
| 81. CR ( 1) N 13  | /295. RY*( 6) C 14         | 0.67 15.24 0.090 |
| 81. CR ( 1) N 13  | /475. RY*( 3) H 33         | 0.51 16.46 0.082 |
| 81. CR ( 1) N 13  | /555. BD*( 1) C 1 - C 3    | 0.59 14.83 0.084 |
| 82. CR ( 1) C 14  | /508. RY*( 1) C 40         | 0.75 10.94 0.081 |
| 82. CR ( 1) C 14  | /557. BD*( 1) C 1 - N 13   | 1.16 10.56 0.100 |
| 83. CR ( 1) O 15  | /290. RY*( 1) C 14         | 5.85 19.67 0.304 |
| 83. CR ( 1) O 15  | /584. BD*( 1) C 14 - C 40  | 0.71 19.25 0.106 |
| 84. CR ( 1) C 16  | /531. RY*( 1) C 43         | 0.83 11.03 0.086 |
| 84. CR ( 1) C 16  | /585. BD*( 1) C 16 - O 17  | 0.67 10.51 0.077 |
| 85. CR ( 1) O 17  | /316. RY*( 1) C 16         | 0.67 19.77 0.103 |
| 85. CR ( 1) O 17  | /317. RY*( 2) C 16         | 1.88 20.21 0.174 |
| 85. CR ( 1) O 17  | /319. RY*( 4) C 16         | 0.69 21.12 0.108 |
| 85. CR ( 1) O 17  | /481. RY*( 4) H 34         | 0.55 20.96 0.096 |
| 86. CR ( 1) O 18  | /316. RY*( 1) C 16         | 6.05 19.66 0.309 |
| 86. CR ( 1) O 18  | /588. BD*( 1) C 16 - C 43  | 0.71 19.25 0.105 |
| 87. CR ( 1) C 19  | /266. RY*( 3) C 12         | 0.72 11.16 0.080 |
| 87. CR ( 1) C 19  | /369. RY*( 2) C 20         | 1.10 11.15 0.099 |
| 87. CR ( 1) C 19  | /382. RY*( 2) C 21         | 2.19 11.29 0.140 |
| 87. CR ( 1) C 19  | /591. BD*( 1) C 19 - C 21  | 1.01 10.71 0.093 |
| 87. CR ( 1) C 19  | /593. BD*( 1) C 20 - C 22  | 0.58 10.71 0.071 |
| 87. CR ( 1) C 19  | /596. BD*( 1) C 21 - C 23  | 1.02 10.52 0.093 |
| 87. CR ( 1) C 19  | /597. BD*( 1) C 21 - H 36  | 0.54 10.50 0.068 |
| 88. CR ( 1) C 20  | /356. RY*( 2) C 19         | 1.31 11.17 0.108 |
| 88. CR ( 1) C 20  | /395. RY*( 2) C 22         | 2.12 11.50 0.139 |
| 88. CR ( 1) C 20  | /577. BD*( 1) C 12 - C 19  | 0.75 10.46 0.079 |
| 88. CR ( 1) C 20  | /591. BD*( 1) C 19 - C 21  | 0.76 10.69 0.081 |
| 88. CR ( 1) C 20  | /593. BD*( 1) C 20 - C 22  | 0.76 10.70 0.080 |
| 88. CR ( 1) C 20  | /598. BD*( 1) C 22 - C 24  | 1.07 10.51 0.095 |
| 89. CR ( 1) C 21  | /355. RY*( 1) C 19         | 1.31 11.34 0.109 |
| 89. CR ( 1) C 21  | /356. RY*( 2) C 19         | 1.68 11.18 0.122 |
| 89. CR ( 1) C 21  | /408. RY*( 2) C 23         | 0.79 11.49 0.085 |
| 89. CR ( 1) C 21  | /489. RY*( 2) H 36         | 0.51 12.36 0.071 |
| 89. CR ( 1) C 21  | /577. BD*( 1) C 12 - C 19  | 1.38 10.46 0.108 |
| 89. CR ( 1) C 21  | /590. BD*( 1) C 19 - C 20  | 1.21 10.50 0.101 |
| 89. CR ( 1) C 21  | /591. BD*( 1) C 19 - C 21  | 0.93 10.69 0.090 |
| 89. CR ( 1) C 21  | /600. BD*( 1) C 23 - C 24  | 0.62 10.70 0.073 |
| 90. CR ( 1) C 22  | /368. RY*( 1) C 20         | 0.62 11.20 0.074 |

|                    |                           |                  |
|--------------------|---------------------------|------------------|
| 90. CR ( 1) C 22   | /369. RY*( 2) C 20        | 0.85 11.13 0.087 |
| 90. CR ( 1) C 22   | /371. RY*( 4) C 20        | 1.13 11.28 0.101 |
| 90. CR ( 1) C 22   | /421. RY*( 2) C 24        | 0.80 11.48 0.086 |
| 90. CR ( 1) C 22   | /494. RY*( 2) H 37        | 0.56 12.29 0.074 |
| 90. CR ( 1) C 22   | /590. BD*( 1) C 19 - C 20 | 1.19 10.51 0.101 |
| 90. CR ( 1) C 22   | /593. BD*( 1) C 20 - C 22 | 0.79 10.70 0.082 |
| 90. CR ( 1) C 22   | /595. BD*( 1) C 20 - H 35 | 0.51 10.49 0.066 |
| 90. CR ( 1) C 22   | /600. BD*( 1) C 23 - C 24 | 0.63 10.70 0.073 |
| 91. CR ( 1) C 23   | /385. RY*( 5) C 21        | 0.65 11.15 0.076 |
| 91. CR ( 1) C 23   | /421. RY*( 2) C 24        | 2.11 11.48 0.139 |
| 91. CR ( 1) C 23   | /499. RY*( 2) H 38        | 0.55 12.28 0.073 |
| 91. CR ( 1) C 23   | /591. BD*( 1) C 19 - C 21 | 0.70 10.69 0.077 |
| 91. CR ( 1) C 23   | /598. BD*( 1) C 22 - C 24 | 1.07 10.51 0.095 |
| 91. CR ( 1) C 23   | /600. BD*( 1) C 23 - C 24 | 0.80 10.70 0.083 |
| 91. CR ( 1) C 23   | /603. BD*( 1) C 24 - H 39 | 0.50 10.49 0.065 |
| 92. CR ( 1) C 24   | /395. RY*( 2) C 22        | 0.76 11.51 0.084 |
| 92. CR ( 1) C 24   | /398. RY*( 5) C 22        | 0.50 10.97 0.066 |
| 92. CR ( 1) C 24   | /408. RY*( 2) C 23        | 2.10 11.49 0.139 |
| 92. CR ( 1) C 24   | /504. RY*( 2) H 39        | 0.55 12.28 0.074 |
| 92. CR ( 1) C 24   | /593. BD*( 1) C 20 - C 22 | 0.63 10.70 0.074 |
| 92. CR ( 1) C 24   | /596. BD*( 1) C 21 - C 23 | 1.07 10.51 0.095 |
| 92. CR ( 1) C 24   | /600. BD*( 1) C 23 - C 24 | 0.79 10.70 0.082 |
| 92. CR ( 1) C 24   | /602. BD*( 1) C 23 - H 38 | 0.50 10.49 0.065 |
| 93. CR ( 1) C 40   | /291. RY*( 2) C 14        | 0.96 11.44 0.094 |
| 93. CR ( 1) C 40   | /532. RY*( 2) C 43        | 0.57 10.80 0.070 |
| 94. CR ( 1) C 43   | /317. RY*( 2) C 16        | 0.73 11.31 0.081 |
| 94. CR ( 1) C 43   | /509. RY*( 2) C 40        | 0.55 10.86 0.069 |
| 95. LP ( 1) O 8    | /186. RY*( 1) C 7         | 1.66 1.51 0.045  |
| 95. LP ( 1) O 8    | /189. RY*( 4) C 7         | 1.60 2.61 0.058  |
| 95. LP ( 1) O 8    | /225. RY*( 1) C 10        | 1.65 1.65 0.047  |
| 95. LP ( 1) O 8    | /227. RY*( 3) C 10        | 0.74 1.54 0.030  |
| 95. LP ( 1) O 8    | /570. BD*( 1) C 7 - O 9   | 5.69 1.08 0.070  |
| 95. LP ( 1) O 8    | /573. BD*( 1) C 10 - H 28 | 0.64 0.95 0.022  |
| 95. LP ( 1) O 8    | /575. BD*( 1) C 10 - H 30 | 2.38 0.95 0.043  |
| 96. LP ( 2) O 8    | /188. RY*( 3) C 7         | 1.79 1.84 0.054  |
| 96. LP ( 2) O 8    | /226. RY*( 2) C 10        | 1.48 1.50 0.044  |
| 96. LP ( 2) O 8    | /571. BD*( 2) C 7 - O 9   | 38.51 0.31 0.100 |
| 96. LP ( 2) O 8    | /573. BD*( 1) C 10 - H 28 | 5.06 0.70 0.056  |
| 96. LP ( 2) O 8    | /574. BD*( 1) C 10 - H 29 | 5.06 0.69 0.055  |
| 97. LP ( 1) O 9    | /186. RY*( 1) C 7         | 12.37 1.64 0.127 |
| 97. LP ( 1) O 9    | /196. RY*( 11) C 7        | 0.75 4.97 0.055  |
| 97. LP ( 1) O 9    | /562. BD*( 1) C 3 - C 7   | 2.24 1.13 0.045  |
| 97. LP ( 1) O 9    | /569. BD*( 1) C 7 - O 8   | 0.98 0.99 0.028  |
| 98. LP ( 2) O 9    | /187. RY*( 2) C 7         | 1.92 1.69 0.053  |
| 98. LP ( 2) O 9    | /189. RY*( 4) C 7         | 1.73 2.30 0.058  |
| 98. LP ( 2) O 9    | /562. BD*( 1) C 3 - C 7   | 12.39 0.68 0.084 |
| 98. LP ( 2) O 9    | /569. BD*( 1) C 7 - O 8   | 28.91 0.55 0.113 |
| 98. LP ( 2) O 9    | /575. BD*( 1) C 10 - H 30 | 0.81 0.64 0.021  |
| 99. LP ( 1) Se 11  | /173. RY*( 1) C 6         | 1.17 1.78 0.041  |
| 99. LP ( 1) Se 11  | /565. BD*( 1) C 5 - C 6   | 3.29 1.35 0.060  |
| 100. LP ( 2) Se 11 | /563. BD*( 1) C 4 - C 6   | 1.73 0.69 0.031  |
| 100. LP ( 2) Se 11 | /565. BD*( 1) C 5 - C 6   | 1.20 0.87 0.030  |
| 100. LP ( 2) Se 11 | /566. BD*( 2) C 5 - C 6   | 8.94 0.26 0.045  |
| 100. LP ( 2) Se 11 | /578. BD*( 1) C 12 - H 31 | 2.37 0.61 0.035  |
| 100. LP ( 2) Se 11 | /579. BD*( 1) C 12 - H 32 | 3.94 0.61 0.045  |

|                          |                            |                   |
|--------------------------|----------------------------|-------------------|
| 101. LP ( 1) N 13        | /110. RY*( 3) C 1          | 1.08 1.53 0.039   |
| 101. LP ( 1) N 13        | /111. RY*( 4) C 1          | 0.78 1.62 0.034   |
| 101. LP ( 1) N 13        | /292. RY*( 3) C 14         | 1.64 1.72 0.051   |
| 101. LP ( 1) N 13        | /297. RY*( 8) C 14         | 0.52 1.68 0.029   |
| 101. LP ( 1) N 13        | /474. RY*( 2) H 33         | 0.74 1.95 0.037   |
| 101. LP ( 1) N 13        | /554. BD*( 1) C 1 - C 2    | 3.77 0.71 0.050   |
| 101. LP ( 1) N 13        | /555. BD*( 1) C 1 - C 3    | 2.77 0.88 0.047   |
| 101. LP ( 1) N 13        | /556. BD*( 2) C 1 - C 3    | 17.55 0.30 0.065  |
| 101. LP ( 1) N 13        | /583. BD*( 2) C 14 - O 15  | 50.40 0.26 0.103  |
| 102. LP ( 1) O 15        | /290. RY*( 1) C 14         | 13.76 1.51 0.129  |
| 102. LP ( 1) O 15        | /580. BD*( 1) N 13 - C 14  | 1.20 1.06 0.032   |
| 102. LP ( 1) O 15        | /584. BD*( 1) C 14 - C 40  | 2.18 1.09 0.044   |
| 103. LP ( 2) O 15        | /291. RY*( 2) C 14         | 1.53 1.62 0.046   |
| 103. LP ( 2) O 15        | /293. RY*( 4) C 14         | 1.81 2.51 0.062   |
| 103. LP ( 2) O 15        | /580. BD*( 1) N 13 - C 14  | 23.79 0.62 0.110  |
| 103. LP ( 2) O 15        | /584. BD*( 1) C 14 - C 40  | 15.11 0.65 0.090  |
| 103. LP ( 2) O 15        | /588. BD*( 1) C 16 - C 43  | 0.75 0.64 0.020   |
| 104. LP ( 1) O 17        | /316. RY*( 1) C 16         | 2.24 1.41 0.050   |
| 104. LP ( 1) O 17        | /319. RY*( 4) C 16         | 1.90 2.76 0.065   |
| 104. LP ( 1) O 17        | /480. RY*( 3) H 34         | 1.29 2.28 0.049   |
| 104. LP ( 1) O 17        | /586. BD*( 1) C 16 - O 18  | 5.42 1.14 0.070   |
| 105. LP ( 2) O 17        | /318. RY*( 3) C 16         | 1.99 1.87 0.057   |
| 105. LP ( 2) O 17        | /479. RY*( 2) H 34         | 1.57 1.81 0.050   |
| 105. LP ( 2) O 17        | /587. BD*( 2) C 16 - O 18  | 41.20 0.32 0.103  |
| 106. LP ( 1) O 18        | /316. RY*( 1) C 16         | 14.35 1.51 0.131  |
| 106. LP ( 1) O 18        | /585. BD*( 1) C 16 - O 17  | 0.86 1.00 0.027   |
| 106. LP ( 1) O 18        | /588. BD*( 1) C 16 - C 43  | 2.14 1.10 0.044   |
| 107. LP ( 2) O 18        | /317. RY*( 2) C 16         | 2.58 1.50 0.057   |
| 107. LP ( 2) O 18        | /319. RY*( 4) C 16         | 1.18 2.41 0.049   |
| 107. LP ( 2) O 18        | /584. BD*( 1) C 14 - C 40  | 0.74 0.66 0.020   |
| 107. LP ( 2) O 18        | /585. BD*( 1) C 16 - O 17  | 27.87 0.56 0.112  |
| 107. LP ( 2) O 18        | /588. BD*( 1) C 16 - C 43  | 13.64 0.65 0.086  |
| 556. BD*( 2) C 1 - C 3   | /112. RY*( 5) C 1          | 1.08 1.28 0.084   |
| 556. BD*( 2) C 1 - C 3   | /137. RY*( 4) C 3          | 0.88 0.75 0.058   |
| 556. BD*( 2) C 1 - C 3   | /559. BD*( 2) C 2 - C 4    | 130.35 0.01 0.072 |
| 556. BD*( 2) C 1 - C 3   | /569. BD*( 1) C 7 - O 8    | 0.80 0.25 0.028   |
| 556. BD*( 2) C 1 - C 3   | /580. BD*( 1) N 13 - C 14  | 0.68 0.34 0.031   |
| 556. BD*( 2) C 1 - C 3   | /581. BD*( 1) N 13 - H 33  | 0.99 0.31 0.039   |
| 559. BD*( 2) C 2 - C 4   | /123. RY*( 3) C 2          | 0.76 0.69 0.068   |
| 559. BD*( 2) C 2 - C 4   | /151. RY*( 5) C 4          | 0.86 1.36 0.101   |
| 566. BD*( 2) C 5 - C 6   | /162. RY*( 3) C 5          | 2.54 0.54 0.094   |
| 566. BD*( 2) C 5 - C 6   | /175. RY*( 3) C 6          | 0.52 0.85 0.053   |
| 566. BD*( 2) C 5 - C 6   | /576. BD*( 1) Se 11 - C 12 | 1.27 0.07 0.023   |
| 569. BD*( 1) C 7 - O 8   | /187. RY*( 2) C 7          | 1.61 1.15 0.162   |
| 569. BD*( 1) C 7 - O 8   | /199. RY*( 1) O 8          | 0.56 1.05 0.093   |
| 569. BD*( 1) C 7 - O 8   | /561. BD*( 1) C 3 - C 5    | 1.05 0.17 0.046   |
| 569. BD*( 1) C 7 - O 8   | /562. BD*( 1) C 3 - C 7    | 0.80 0.14 0.034   |
| 569. BD*( 1) C 7 - O 8   | /570. BD*( 1) C 7 - O 9    | 0.53 0.22 0.039   |
| 569. BD*( 1) C 7 - O 8   | /575. BD*( 1) C 10 - H 30  | 0.50 0.09 0.025   |
| 571. BD*( 2) C 7 - O 9   | /188. RY*( 3) C 7          | 1.52 1.52 0.119   |
| 571. BD*( 2) C 7 - O 9   | /213. RY*( 2) O 9          | 1.10 0.98 0.082   |
| 571. BD*( 2) C 7 - O 9   | /556. BD*( 2) C 1 - C 3    | 33.53 0.05 0.068  |
| 583. BD*( 2) C 14 - O 15 | /292. RY*( 3) C 14         | 1.29 1.46 0.107   |
| 583. BD*( 2) C 14 - O 15 | /297. RY*( 8) C 14         | 0.79 1.42 0.083   |
| 583. BD*( 2) C 14 - O 15 | /304. RY*( 2) O 15         | 1.20 1.00 0.086   |

|                          |                           |      |      |       |
|--------------------------|---------------------------|------|------|-------|
| 583. BD*( 2) C 14 - O 15 | /604. BD*( 1) C 40 - H 41 | 1.04 | 0.37 | 0.048 |
| 583. BD*( 2) C 14 - O 15 | /605. BD*( 1) C 40 - H 42 | 1.15 | 0.37 | 0.050 |
| 587. BD*( 2) C 16 - O 18 | /318. RY*( 3) C 16        | 1.41 | 1.55 | 0.126 |
| 587. BD*( 2) C 16 - O 18 | /324. RY*( 9) C 16        | 0.52 | 1.17 | 0.067 |
| 587. BD*( 2) C 16 - O 18 | /343. RY*( 2) O 18        | 0.81 | 0.95 | 0.076 |
| 587. BD*( 2) C 16 - O 18 | /607. BD*( 1) C 43 - H 44 | 0.88 | 0.39 | 0.049 |
| 587. BD*( 2) C 16 - O 18 | /608. BD*( 1) C 43 - H 45 | 0.89 | 0.39 | 0.049 |
| 592. BD*( 2) C 19 - C 21 | /358. RY*( 4) C 19        | 0.62 | 1.46 | 0.077 |
| 592. BD*( 2) C 19 - C 21 | /383. RY*( 3) C 21        | 2.45 | 0.50 | 0.090 |
| 592. BD*( 2) C 19 - C 21 | /568. BD*( 1) C 6 -Se 11  | 0.50 | 0.08 | 0.016 |
| 592. BD*( 2) C 19 - C 21 | /576. BD*( 1)Se 11 - C 12 | 4.72 | 0.05 | 0.039 |
| 592. BD*( 2) C 19 - C 21 | /578. BD*( 1) C 12 - H 31 | 0.70 | 0.33 | 0.038 |
| 594. BD*( 2) C 20 - C 22 | /370. RY*( 3) C 20        | 0.82 | 0.67 | 0.066 |
| 594. BD*( 2) C 20 - C 22 | /372. RY*( 5) C 20        | 0.54 | 1.53 | 0.081 |
| 594. BD*( 2) C 20 - C 22 | /397. RY*( 4) C 22        | 0.72 | 1.42 | 0.090 |
| 601. BD*( 2) C 23 - C 24 | /410. RY*( 4) C 23        | 0.83 | 1.38 | 0.094 |
| 601. BD*( 2) C 23 - C 24 | /422. RY*( 3) C 24        | 0.89 | 0.65 | 0.066 |
| 601. BD*( 2) C 23 - C 24 | /423. RY*( 4) C 24        | 0.57 | 1.52 | 0.081 |

# NATURAL BOND ORBITAL ANALYSIS:

|       |         | Occupancies |           | Lewis Structure |     | Low |    | High |      |      |
|-------|---------|-------------|-----------|-----------------|-----|-----|----|------|------|------|
|       | Occ.    | -----       | -----     |                 | occ | occ |    |      |      |      |
| Cycle | Thresh. | Lewis       | Non-Lewis | CR              | BD  | 3C  | LP | (L)  | (NL) | Dev  |
| 1(1)  | 1.90    | 204.74027   | 9.25973   | 39              | 53  | 0   | 15 | 21   | 13   | 0.64 |
| 2(2)  | 1.90    | 204.74027   | 9.25973   | 39              | 53  | 0   | 15 | 21   | 13   | 0.64 |
| 3(1)  | 1.80    | 205.89211   | 8.10789   | 39              | 50  | 0   | 18 | 6    | 10   | 0.64 |
| 4(2)  | 1.80    | 205.89211   | 8.10789   | 39              | 50  | 0   | 18 | 6    | 10   | 0.64 |
| 5(1)  | 1.70    | 210.32619   | 3.67381   | 39              | 55  | 0   | 13 | 0    | 10   | 0.25 |
| 6(2)  | 1.70    | 210.32619   | 3.67381   | 39              | 55  | 0   | 13 | 0    | 10   | 0.25 |
| 7(1)  | 1.60    | 210.32619   | 3.67381   | 39              | 55  | 0   | 13 | 0    | 10   | 0.25 |
| 8(2)  | 1.60    | 210.32619   | 3.67381   | 39              | 55  | 0   | 13 | 0    | 10   | 0.25 |
| 9(1)  | 1.50    | 209.81510   | 4.18490   | 39              | 54  | 0   | 14 | 1    | 12   | 0.74 |
| 10(2) | 1.50    | 209.35626   | 4.64374   | 39              | 54  | 0   | 14 | 1    | 12   | 1.04 |
| 11(3) | 1.50    | 209.81510   | 4.18490   | 39              | 54  | 0   | 14 | 1    | 12   | 0.74 |
| 12(1) | 1.70    | 210.32619   | 3.67381   | 39              | 55  | 0   | 13 | 0    | 10   | 0.25 |

Core 77.97738 ( 99.971% of 78)  
Valence Lewis 132.34881 ( 97.315% of 136)

=====  
Total Lewis 210.32619 ( 98.283% of 214)

=====  
Valence non-Lewis 3.28120 ( 1.533% of 214)  
Rydberg non-Lewis 0.39261 ( 0.183% of 214)

=====  
Total non-Lewis 3.67381 ( 1.717% of 214)  
=====

# Second Order Perturbation Theory Analysis of Fock Matrix in NBO Basis

Threshold for printing: 0.50 kcal/mol

| Donor NBO (i)         | Acceptor NBO (j)          | E(2)<br>kcal/mol | E(j)-E(i)<br>a.u. | F(i,j)<br>a.u. |
|-----------------------|---------------------------|------------------|-------------------|----------------|
| =====                 |                           |                  |                   |                |
| within unit 1         |                           |                  |                   |                |
| 1. BD ( 1) C 1 - C 2  | /144. RY*( 1) C 3         | 0.78             | 2.49              | 0.040          |
| 1. BD ( 1) C 1 - C 2  | /145. RY*( 2) C 3         | 0.70             | 1.95              | 0.033          |
| 1. BD ( 1) C 1 - C 2  | /158. RY*( 2) C 4         | 2.14             | 1.83              | 0.056          |
| 1. BD ( 1) C 1 - C 2  | /287. RY*( 1) N 13        | 0.89             | 1.52              | 0.033          |
| 1. BD ( 1) C 1 - C 2  | /599. BD*( 1) C 1 - C 3   | 4.22             | 1.27              | 0.065          |
| 1. BD ( 1) C 1 - C 2  | /601. BD*( 1) C 1 - N 13  | 0.57             | 1.03              | 0.022          |
| 1. BD ( 1) C 1 - C 2  | /602. BD*( 1) C 2 - C 4   | 2.90             | 1.31              | 0.055          |
| 1. BD ( 1) C 1 - C 2  | /604. BD*( 1) C 2 - H 32  | 0.61             | 1.10              | 0.023          |
| 1. BD ( 1) C 1 - C 2  | /606. BD*( 1) C 3 - C 7   | 4.37             | 1.07              | 0.061          |
| 1. BD ( 1) C 1 - C 2  | /608. BD*( 1) C 4 - H 33  | 2.83             | 1.10              | 0.050          |
| 1. BD ( 1) C 1 - C 2  | /625. BD*( 1) N 13 - H 40 | 1.58             | 1.00              | 0.036          |
| 2. BD ( 1) C 1 - C 3  | /131. RY*( 1) C 2         | 0.75             | 2.02              | 0.035          |
| 2. BD ( 1) C 1 - C 3  | /170. RY*( 1) C 5         | 0.59             | 1.88              | 0.030          |
| 2. BD ( 1) C 1 - C 3  | /199. RY*( 4) C 7         | 0.59             | 2.77              | 0.036          |
| 2. BD ( 1) C 1 - C 3  | /287. RY*( 1) N 13        | 0.70             | 1.62              | 0.030          |
| 2. BD ( 1) C 1 - C 3  | /598. BD*( 1) C 1 - C 2   | 3.46             | 1.20              | 0.057          |
| 2. BD ( 1) C 1 - C 3  | /601. BD*( 1) C 1 - N 13  | 2.09             | 1.12              | 0.043          |
| 2. BD ( 1) C 1 - C 3  | /604. BD*( 1) C 2 - H 32  | 1.29             | 1.20              | 0.035          |
| 2. BD ( 1) C 1 - C 3  | /605. BD*( 1) C 3 - C 5   | 4.21             | 1.20              | 0.063          |
| 2. BD ( 1) C 1 - C 3  | /606. BD*( 1) C 3 - C 7   | 2.94             | 1.17              | 0.053          |
| 2. BD ( 1) C 1 - C 3  | /611. BD*( 1) C 5 - H 34  | 1.32             | 1.20              | 0.036          |
| 2. BD ( 1) C 1 - C 3  | /614. BD*( 1) C 7 - O 9   | 1.15             | 1.26              | 0.034          |
| 2. BD ( 1) C 1 - C 3  | /624. BD*( 1) N 13 - C 14 | 2.08             | 1.12              | 0.044          |
| 3. BD ( 2) C 1 - C 3  | /133. RY*( 3) C 2         | 1.10             | 1.01              | 0.032          |
| 3. BD ( 2) C 1 - C 3  | /172. RY*( 3) C 5         | 0.87             | 0.85              | 0.026          |
| 3. BD ( 2) C 1 - C 3  | /200. RY*( 5) C 7         | 0.61             | 1.46              | 0.029          |
| 3. BD ( 2) C 1 - C 3  | /603. BD*( 2) C 2 - C 4   | 10.81            | 0.33              | 0.054          |
| 3. BD ( 2) C 1 - C 3  | /610. BD*( 2) C 5 - C 6   | 13.76            | 0.32              | 0.059          |
| 3. BD ( 2) C 1 - C 3  | /613. BD*( 1) C 7 - O 8   | 1.11             | 0.57              | 0.023          |
| 3. BD ( 2) C 1 - C 3  | /615. BD*( 2) C 7 - O 9   | 18.62            | 0.27              | 0.063          |
| 3. BD ( 2) C 1 - C 3  | /624. BD*( 1) N 13 - C 14 | 1.51             | 0.65              | 0.029          |
| 3. BD ( 2) C 1 - C 3  | /625. BD*( 1) N 13 - H 40 | 1.48             | 0.63              | 0.029          |
| 4. BD ( 1) C 1 - N 13 | /131. RY*( 1) C 2         | 0.53             | 2.06              | 0.030          |
| 4. BD ( 1) C 1 - N 13 | /144. RY*( 1) C 3         | 1.33             | 2.63              | 0.053          |
| 4. BD ( 1) C 1 - N 13 | /300. RY*( 1) C 14        | 1.53             | 1.68              | 0.045          |
| 4. BD ( 1) C 1 - N 13 | /598. BD*( 1) C 1 - C 2   | 0.64             | 1.24              | 0.025          |
| 4. BD ( 1) C 1 - N 13 | /599. BD*( 1) C 1 - C 3   | 2.16             | 1.41              | 0.049          |
| 4. BD ( 1) C 1 - N 13 | /602. BD*( 1) C 2 - C 4   | 0.86             | 1.45              | 0.032          |
| 4. BD ( 1) C 1 - N 13 | /605. BD*( 1) C 3 - C 5   | 2.70             | 1.24              | 0.052          |
| 4. BD ( 1) C 1 - N 13 | /624. BD*( 1) N 13 - C 14 | 0.85             | 1.15              | 0.029          |
| 4. BD ( 1) C 1 - N 13 | /626. BD*( 1) C 14 - C 15 | 1.68             | 1.22              | 0.041          |
| 5. BD ( 1) C 2 - C 4  | /118. RY*( 1) C 1         | 1.42             | 1.95              | 0.047          |
| 5. BD ( 1) C 2 - C 4  | /120. RY*( 3) C 1         | 0.91             | 2.01              | 0.038          |
| 5. BD ( 1) C 2 - C 4  | /183. RY*( 1) C 6         | 1.07             | 1.82              | 0.040          |
| 5. BD ( 1) C 2 - C 4  | /598. BD*( 1) C 1 - C 2   | 2.70             | 1.19              | 0.051          |

|                        |                          |       |      |       |
|------------------------|--------------------------|-------|------|-------|
| 5. BD ( 1) C 2 - C 4   | /601. BD*( 1) C 1 - N 13 | 2.79  | 1.12 | 0.050 |
| 5. BD ( 1) C 2 - C 4   | /604. BD*( 1) C 2 - H 32 | 1.68  | 1.20 | 0.040 |
| 5. BD ( 1) C 2 - C 4   | /607. BD*( 1) C 4 - C 6  | 3.67  | 1.21 | 0.060 |
| 5. BD ( 1) C 2 - C 4   | /608. BD*( 1) C 4 - H 33 | 1.59  | 1.19 | 0.039 |
| 5. BD ( 1) C 2 - C 4   | /612. BD*( 1) C 6 -Se 11 | 3.17  | 0.88 | 0.047 |
| 6. BD ( 2) C 2 - C 4   | /123. RY*( 6) C 1        | 0.62  | 1.83 | 0.032 |
| 6. BD ( 2) C 2 - C 4   | /185. RY*( 3) C 6        | 0.54  | 1.12 | 0.023 |
| 6. BD ( 2) C 2 - C 4   | /600. BD*( 2) C 1 - C 3  | 14.23 | 0.31 | 0.060 |
| 6. BD ( 2) C 2 - C 4   | /610. BD*( 2) C 5 - C 6  | 13.05 | 0.31 | 0.057 |
| 7. BD ( 1) C 2 - H 32  | /118. RY*( 1) C 1        | 0.65  | 1.72 | 0.030 |
| 7. BD ( 1) C 2 - H 32  | /119. RY*( 2) C 1        | 0.88  | 1.83 | 0.036 |
| 7. BD ( 1) C 2 - H 32  | /157. RY*( 1) C 4        | 1.44  | 1.68 | 0.044 |
| 7. BD ( 1) C 2 - H 32  | /599. BD*( 1) C 1 - C 3  | 3.22  | 1.14 | 0.054 |
| 7. BD ( 1) C 2 - H 32  | /601. BD*( 1) C 1 - N 13 | 0.61  | 0.89 | 0.021 |
| 7. BD ( 1) C 2 - H 32  | /602. BD*( 1) C 2 - C 4  | 1.59  | 1.17 | 0.039 |
| 7. BD ( 1) C 2 - H 32  | /607. BD*( 1) C 4 - C 6  | 5.73  | 0.98 | 0.067 |
| 7. BD ( 1) C 2 - H 32  | /608. BD*( 1) C 4 - H 33 | 0.95  | 0.96 | 0.027 |
| 8. BD ( 1) C 3 - C 5   | /119. RY*( 2) C 1        | 1.22  | 1.95 | 0.044 |
| 8. BD ( 1) C 3 - C 5   | /184. RY*( 2) C 6        | 1.45  | 1.48 | 0.042 |
| 8. BD ( 1) C 3 - C 5   | /196. RY*( 1) C 7        | 0.99  | 1.58 | 0.036 |
| 8. BD ( 1) C 3 - C 5   | /599. BD*( 1) C 1 - C 3  | 4.55  | 1.26 | 0.068 |
| 8. BD ( 1) C 3 - C 5   | /601. BD*( 1) C 1 - N 13 | 5.32  | 1.02 | 0.066 |
| 8. BD ( 1) C 3 - C 5   | /606. BD*( 1) C 3 - C 7  | 1.66  | 1.06 | 0.038 |
| 8. BD ( 1) C 3 - C 5   | /609. BD*( 1) C 5 - C 6  | 3.94  | 1.29 | 0.064 |
| 8. BD ( 1) C 3 - C 5   | /611. BD*( 1) C 5 - H 34 | 0.63  | 1.10 | 0.024 |
| 8. BD ( 1) C 3 - C 5   | /612. BD*( 1) C 6 -Se 11 | 5.62  | 0.77 | 0.059 |
| 8. BD ( 1) C 3 - C 5   | /613. BD*( 1) C 7 - O 8  | 2.80  | 0.93 | 0.046 |
| 8. BD ( 1) C 3 - C 5   | /615. BD*( 2) C 7 - O 9  | 0.54  | 0.63 | 0.017 |
| 9. BD ( 1) C 3 - C 7   | /118. RY*( 1) C 1        | 0.85  | 1.88 | 0.036 |
| 9. BD ( 1) C 3 - C 7   | /119. RY*( 2) C 1        | 1.03  | 1.99 | 0.041 |
| 9. BD ( 1) C 3 - C 7   | /170. RY*( 1) C 5        | 1.04  | 1.82 | 0.039 |
| 9. BD ( 1) C 3 - C 7   | /222. RY*( 1) O 9        | 0.72  | 1.81 | 0.032 |
| 9. BD ( 1) C 3 - C 7   | /598. BD*( 1) C 1 - C 2  | 3.78  | 1.13 | 0.058 |
| 9. BD ( 1) C 3 - C 7   | /599. BD*( 1) C 1 - C 3  | 3.98  | 1.30 | 0.064 |
| 9. BD ( 1) C 3 - C 7   | /605. BD*( 1) C 3 - C 5  | 1.29  | 1.13 | 0.034 |
| 9. BD ( 1) C 3 - C 7   | /609. BD*( 1) C 5 - C 6  | 1.49  | 1.33 | 0.040 |
| 9. BD ( 1) C 3 - C 7   | /614. BD*( 1) C 7 - O 9  | 0.94  | 1.19 | 0.030 |
| 9. BD ( 1) C 3 - C 7   | /616. BD*( 1) O 8 - C 10 | 2.83  | 0.96 | 0.047 |
| 10. BD ( 1) C 4 - C 6  | /131. RY*( 1) C 2        | 0.75  | 1.94 | 0.034 |
| 10. BD ( 1) C 4 - C 6  | /132. RY*( 2) C 2        | 1.59  | 2.00 | 0.051 |
| 10. BD ( 1) C 4 - C 6  | /170. RY*( 1) C 5        | 0.87  | 1.80 | 0.035 |
| 10. BD ( 1) C 4 - C 6  | /171. RY*( 2) C 5        | 0.95  | 1.64 | 0.035 |
| 10. BD ( 1) C 4 - C 6  | /602. BD*( 1) C 2 - C 4  | 3.18  | 1.32 | 0.058 |
| 10. BD ( 1) C 4 - C 6  | /604. BD*( 1) C 2 - H 32 | 2.63  | 1.12 | 0.049 |
| 10. BD ( 1) C 4 - C 6  | /608. BD*( 1) C 4 - H 33 | 0.87  | 1.11 | 0.028 |
| 10. BD ( 1) C 4 - C 6  | /609. BD*( 1) C 5 - C 6  | 3.54  | 1.32 | 0.061 |
| 10. BD ( 1) C 4 - C 6  | /611. BD*( 1) C 5 - H 34 | 3.40  | 1.12 | 0.055 |
| 11. BD ( 1) C 4 - H 33 | /131. RY*( 1) C 2        | 1.54  | 1.79 | 0.047 |
| 11. BD ( 1) C 4 - H 33 | /183. RY*( 1) C 6        | 1.12  | 1.60 | 0.038 |
| 11. BD ( 1) C 4 - H 33 | /598. BD*( 1) C 1 - C 2  | 5.65  | 0.97 | 0.066 |
| 11. BD ( 1) C 4 - H 33 | /602. BD*( 1) C 2 - C 4  | 1.52  | 1.18 | 0.038 |
| 11. BD ( 1) C 4 - H 33 | /604. BD*( 1) C 2 - H 32 | 0.95  | 0.97 | 0.027 |
| 11. BD ( 1) C 4 - H 33 | /609. BD*( 1) C 5 - C 6  | 3.20  | 1.17 | 0.055 |
| 12. BD ( 1) C 5 - C 6  | /144. RY*( 1) C 3        | 1.48  | 2.60 | 0.056 |
| 12. BD ( 1) C 5 - C 6  | /145. RY*( 2) C 3        | 0.65  | 2.05 | 0.033 |

|                          |                            |       |      |       |
|--------------------------|----------------------------|-------|------|-------|
| 12. BD ( 1) C 5 - C 6    | /157. RY*( 1) C 4          | 1.03  | 1.92 | 0.040 |
| 12. BD ( 1) C 5 - C 6    | /605. BD*( 1) C 3 - C 5    | 3.32  | 1.21 | 0.057 |
| 12. BD ( 1) C 5 - C 6    | /606. BD*( 1) C 3 - C 7    | 2.01  | 1.18 | 0.044 |
| 12. BD ( 1) C 5 - C 6    | /607. BD*( 1) C 4 - C 6    | 3.19  | 1.23 | 0.056 |
| 12. BD ( 1) C 5 - C 6    | /608. BD*( 1) C 4 - H 33   | 1.64  | 1.21 | 0.040 |
| 12. BD ( 1) C 5 - C 6    | /611. BD*( 1) C 5 - H 34   | 2.30  | 1.22 | 0.047 |
| 13. BD ( 2) C 5 - C 6    | /147. RY*( 4) C 3          | 0.64  | 1.07 | 0.025 |
| 13. BD ( 2) C 5 - C 6    | /159. RY*( 3) C 4          | 1.74  | 1.11 | 0.042 |
| 13. BD ( 2) C 5 - C 6    | /248. RY*( 1) Se 11        | 0.91  | 0.84 | 0.026 |
| 13. BD ( 2) C 5 - C 6    | /600. BD*( 2) C 1 - C 3    | 11.67 | 0.31 | 0.055 |
| 13. BD ( 2) C 5 - C 6    | /603. BD*( 2) C 2 - C 4    | 13.05 | 0.33 | 0.059 |
| 13. BD ( 2) C 5 - C 6    | /620. BD*( 1) Se 11 - C 12 | 0.51  | 0.38 | 0.013 |
| 14. BD ( 1) C 5 - H 34   | /144. RY*( 1) C 3          | 1.80  | 2.36 | 0.058 |
| 14. BD ( 1) C 5 - H 34   | /183. RY*( 1) C 6          | 1.77  | 1.59 | 0.048 |
| 14. BD ( 1) C 5 - H 34   | /599. BD*( 1) C 1 - C 3    | 3.07  | 1.14 | 0.053 |
| 14. BD ( 1) C 5 - H 34   | /607. BD*( 1) C 4 - C 6    | 6.02  | 0.98 | 0.069 |
| 14. BD ( 1) C 5 - H 34   | /609. BD*( 1) C 5 - C 6    | 2.13  | 1.17 | 0.045 |
| 15. BD ( 1) C 6 - Se 11  | /157. RY*( 1) C 4          | 2.06  | 1.74 | 0.054 |
| 15. BD ( 1) C 6 - Se 11  | /170. RY*( 1) C 5          | 1.65  | 1.72 | 0.048 |
| 15. BD ( 1) C 6 - Se 11  | /274. RY*( 1) C 12         | 0.59  | 1.34 | 0.025 |
| 15. BD ( 1) C 6 - Se 11  | /602. BD*( 1) C 2 - C 4    | 2.63  | 1.24 | 0.051 |
| 15. BD ( 1) C 6 - Se 11  | /605. BD*( 1) C 3 - C 5    | 5.19  | 1.03 | 0.065 |
| 15. BD ( 1) C 6 - Se 11  | /609. BD*( 1) C 5 - C 6    | 0.96  | 1.23 | 0.031 |
| 15. BD ( 1) C 6 - Se 11  | /611. BD*( 1) C 5 - H 34   | 0.92  | 1.04 | 0.028 |
| 15. BD ( 1) C 6 - Se 11  | /621. BD*( 1) C 12 - C 21  | 0.92  | 0.99 | 0.027 |
| 16. BD ( 1) C 7 - O 8    | /145. RY*( 2) C 3          | 1.04  | 2.16 | 0.042 |
| 16. BD ( 1) C 7 - O 8    | /237. RY*( 3) C 10         | 1.07  | 1.84 | 0.040 |
| 16. BD ( 1) C 7 - O 8    | /605. BD*( 1) C 3 - C 5    | 1.28  | 1.31 | 0.037 |
| 16. BD ( 1) C 7 - O 8    | /619. BD*( 1) C 10 - H 37  | 0.65  | 1.24 | 0.025 |
| 17. BD ( 1) C 7 - O 9    | /145. RY*( 2) C 3          | 1.28  | 2.29 | 0.048 |
| 17. BD ( 1) C 7 - O 9    | /196. RY*( 1) C 7          | 1.64  | 1.94 | 0.050 |
| 17. BD ( 1) C 7 - O 9    | /599. BD*( 1) C 1 - C 3    | 1.55  | 1.62 | 0.045 |
| 17. BD ( 1) C 7 - O 9    | /606. BD*( 1) C 3 - C 7    | 1.77  | 1.42 | 0.045 |
| 18. BD ( 2) C 7 - O 9    | /600. BD*( 2) C 1 - C 3    | 4.57  | 0.40 | 0.041 |
| 18. BD ( 2) C 7 - O 9    | /615. BD*( 2) C 7 - O 9    | 0.64  | 0.36 | 0.014 |
| 19. BD ( 1) O 8 - C 10   | /196. RY*( 1) C 7          | 1.27  | 1.77 | 0.042 |
| 19. BD ( 1) O 8 - C 10   | /606. BD*( 1) C 3 - C 7    | 2.63  | 1.25 | 0.052 |
| 20. BD ( 1) C 10 - H 35  | /210. RY*( 2) O 8          | 0.53  | 1.51 | 0.025 |
| 20. BD ( 1) C 10 - H 35  | /616. BD*( 1) O 8 - C 10   | 0.50  | 0.79 | 0.018 |
| 21. BD ( 1) C 10 - H 36  | /210. RY*( 2) O 8          | 0.58  | 1.51 | 0.026 |
| 21. BD ( 1) C 10 - H 36  | /616. BD*( 1) O 8 - C 10   | 0.59  | 0.79 | 0.019 |
| 22. BD ( 1) C 10 - H 37  | /613. BD*( 1) C 7 - O 8    | 3.95  | 0.80 | 0.051 |
| 23. BD ( 1) Se 11 - C 12 | /395. RY*( 5) C 21         | 0.65  | 2.07 | 0.033 |
| 23. BD ( 1) Se 11 - C 12 | /607. BD*( 1) C 4 - C 6    | 1.77  | 1.03 | 0.038 |
| 23. BD ( 1) Se 11 - C 12 | /610. BD*( 2) C 5 - C 6    | 0.88  | 0.59 | 0.022 |
| 23. BD ( 1) Se 11 - C 12 | /638. BD*( 1) C 21 - O 22  | 0.71  | 1.09 | 0.025 |
| 23. BD ( 1) Se 11 - C 12 | /639. BD*( 2) C 21 - O 22  | 6.56  | 0.58 | 0.058 |
| 24. BD ( 1) C 12 - C 21  | /404. RY*( 1) O 22         | 0.80  | 1.81 | 0.034 |
| 24. BD ( 1) C 12 - C 21  | /417. RY*( 1) N 23         | 1.84  | 1.70 | 0.050 |
| 24. BD ( 1) C 12 - C 21  | /622. BD*( 1) C 12 - H 38  | 0.59  | 1.06 | 0.022 |
| 24. BD ( 1) C 12 - C 21  | /638. BD*( 1) C 21 - O 22  | 0.80  | 1.21 | 0.028 |
| 24. BD ( 1) C 12 - C 21  | /641. BD*( 1) N 23 - C 24  | 2.90  | 1.08 | 0.050 |
| 25. BD ( 1) C 12 - H 38  | /394. RY*( 4) C 21         | 0.66  | 2.40 | 0.036 |
| 25. BD ( 1) C 12 - H 38  | /638. BD*( 1) C 21 - O 22  | 3.19  | 1.04 | 0.052 |
| 25. BD ( 1) C 12 - H 38  | /639. BD*( 2) C 21 - O 22  | 2.65  | 0.54 | 0.036 |

|                         |                           |                  |
|-------------------------|---------------------------|------------------|
| 26. BD ( 1) C 12 - H 39 | /391. RY*( 1) C 21        | 0.55 1.29 0.024  |
| 26. BD ( 1) C 12 - H 39 | /621. BD*( 1) C 12 - C 21 | 0.54 0.92 0.020  |
| 26. BD ( 1) C 12 - H 39 | /638. BD*( 1) C 21 - O 22 | 1.04 1.04 0.029  |
| 26. BD ( 1) C 12 - H 39 | /640. BD*( 1) C 21 - N 23 | 5.68 0.89 0.065  |
| 27. BD ( 1) N 13 - C 14 | /118. RY*( 1) C 1         | 0.72 1.99 0.034  |
| 27. BD ( 1) N 13 - C 14 | /119. RY*( 2) C 1         | 0.76 2.10 0.036  |
| 27. BD ( 1) N 13 - C 14 | /314. RY*( 2) C 15        | 1.00 1.89 0.039  |
| 27. BD ( 1) N 13 - C 14 | /599. BD*( 1) C 1 - C 3   | 1.62 1.41 0.043  |
| 27. BD ( 1) N 13 - C 14 | /601. BD*( 1) C 1 - N 13  | 1.05 1.16 0.031  |
| 27. BD ( 1) N 13 - C 14 | /629. BD*( 1) C 15 - C 17 | 1.10 1.42 0.035  |
| 28. BD ( 1) N 13 - H 40 | /118. RY*( 1) C 1         | 1.08 1.85 0.040  |
| 28. BD ( 1) N 13 - H 40 | /301. RY*( 2) C 14        | 0.83 2.04 0.037  |
| 28. BD ( 1) N 13 - H 40 | /303. RY*( 4) C 14        | 0.92 3.07 0.048  |
| 28. BD ( 1) N 13 - H 40 | /598. BD*( 1) C 1 - C 2   | 2.12 1.10 0.043  |
| 28. BD ( 1) N 13 - H 40 | /600. BD*( 2) C 1 - C 3   | 1.54 0.69 0.031  |
| 28. BD ( 1) N 13 - H 40 | /627. BD*( 1) C 14 - O 16 | 2.95 1.18 0.053  |
| 29. BD ( 1) C 14 - C 15 | /288. RY*( 2) N 13        | 1.34 1.76 0.044  |
| 29. BD ( 1) C 14 - C 15 | /326. RY*( 1) O 16        | 0.63 1.86 0.031  |
| 29. BD ( 1) C 14 - C 15 | /339. RY*( 1) C 17        | 2.27 1.82 0.058  |
| 29. BD ( 1) C 14 - C 15 | /601. BD*( 1) C 1 - N 13  | 2.94 1.06 0.050  |
| 29. BD ( 1) C 14 - C 15 | /627. BD*( 1) C 14 - O 16 | 0.97 1.21 0.031  |
| 29. BD ( 1) C 14 - C 15 | /629. BD*( 1) C 15 - C 17 | 2.75 1.32 0.054  |
| 29. BD ( 1) C 14 - C 15 | /632. BD*( 1) C 17 - C 18 | 3.41 1.11 0.055  |
| 30. BD ( 1) C 14 - O 16 | /300. RY*( 1) C 14        | 1.66 1.88 0.050  |
| 30. BD ( 1) C 14 - O 16 | /624. BD*( 1) N 13 - C 14 | 0.53 1.36 0.024  |
| 30. BD ( 1) C 14 - O 16 | /625. BD*( 1) N 13 - H 40 | 1.15 1.34 0.035  |
| 30. BD ( 1) C 14 - O 16 | /626. BD*( 1) C 14 - C 15 | 1.57 1.43 0.043  |
| 30. BD ( 1) C 14 - O 16 | /631. BD*( 1) C 15 - H 30 | 0.86 1.42 0.031  |
| 31. BD ( 2) C 14 - O 16 | /316. RY*( 4) C 15        | 0.63 1.03 0.023  |
| 31. BD ( 2) C 14 - O 16 | /628. BD*( 2) C 14 - O 16 | 0.75 0.35 0.016  |
| 31. BD ( 2) C 14 - O 16 | /630. BD*( 2) C 15 - C 17 | 5.13 0.38 0.040  |
| 32. BD ( 1) C 15 - C 17 | /300. RY*( 1) C 14        | 2.15 1.66 0.053  |
| 32. BD ( 1) C 15 - C 17 | /352. RY*( 1) C 18        | 2.20 1.67 0.054  |
| 32. BD ( 1) C 15 - C 17 | /624. BD*( 1) N 13 - C 14 | 2.47 1.13 0.048  |
| 32. BD ( 1) C 15 - C 17 | /626. BD*( 1) C 14 - C 15 | 2.35 1.20 0.048  |
| 32. BD ( 1) C 15 - C 17 | /631. BD*( 1) C 15 - H 30 | 1.65 1.20 0.040  |
| 32. BD ( 1) C 15 - C 17 | /632. BD*( 1) C 17 - C 18 | 2.00 1.19 0.044  |
| 32. BD ( 1) C 15 - C 17 | /633. BD*( 1) C 17 - H 31 | 1.68 1.21 0.040  |
| 32. BD ( 1) C 15 - C 17 | /634. BD*( 1) C 18 - O 19 | 2.32 1.06 0.045  |
| 33. BD ( 2) C 15 - C 17 | /304. RY*( 5) C 14        | 0.76 1.59 0.032  |
| 33. BD ( 2) C 15 - C 17 | /356. RY*( 5) C 18        | 0.96 1.63 0.037  |
| 33. BD ( 2) C 15 - C 17 | /628. BD*( 2) C 14 - O 16 | 17.70 0.29 0.066 |
| 33. BD ( 2) C 15 - C 17 | /636. BD*( 2) C 18 - O 20 | 19.14 0.28 0.067 |
| 34. BD ( 1) C 15 - H 30 | /301. RY*( 2) C 14        | 0.64 1.93 0.031  |
| 34. BD ( 1) C 15 - H 30 | /303. RY*( 4) C 14        | 0.73 2.96 0.042  |
| 34. BD ( 1) C 15 - H 30 | /339. RY*( 1) C 17        | 1.01 1.67 0.037  |
| 34. BD ( 1) C 15 - H 30 | /340. RY*( 2) C 17        | 0.64 1.60 0.029  |
| 34. BD ( 1) C 15 - H 30 | /627. BD*( 1) C 14 - O 16 | 3.46 1.06 0.054  |
| 34. BD ( 1) C 15 - H 30 | /629. BD*( 1) C 15 - C 17 | 1.49 1.17 0.037  |
| 34. BD ( 1) C 15 - H 30 | /633. BD*( 1) C 17 - H 31 | 4.53 0.98 0.059  |
| 35. BD ( 1) C 17 - C 18 | /313. RY*( 1) C 15        | 2.14 1.74 0.055  |
| 35. BD ( 1) C 17 - C 18 | /378. RY*( 1) O 20        | 0.75 1.78 0.033  |
| 35. BD ( 1) C 17 - C 18 | /626. BD*( 1) C 14 - C 15 | 3.40 1.13 0.056  |
| 35. BD ( 1) C 17 - C 18 | /629. BD*( 1) C 15 - C 17 | 2.34 1.33 0.050  |
| 35. BD ( 1) C 17 - C 18 | /635. BD*( 1) C 18 - O 20 | 0.75 1.22 0.027  |

|                         |                           |                 |
|-------------------------|---------------------------|-----------------|
| 35. BD ( 1) C 17 - C 18 | /637. BD*( 1) O 19 - H 41 | 1.69 1.01 0.037 |
| 36. BD ( 1) C 17 - H 31 | /313. RY*( 1) C 15        | 1.05 1.57 0.036 |
| 36. BD ( 1) C 17 - H 31 | /314. RY*( 2) C 15        | 0.66 1.63 0.029 |
| 36. BD ( 1) C 17 - H 31 | /355. RY*( 4) C 18        | 0.69 2.81 0.040 |
| 36. BD ( 1) C 17 - H 31 | /629. BD*( 1) C 15 - C 17 | 1.66 1.16 0.039 |
| 36. BD ( 1) C 17 - H 31 | /631. BD*( 1) C 15 - H 30 | 4.95 0.96 0.062 |
| 36. BD ( 1) C 17 - H 31 | /634. BD*( 1) C 18 - O 19 | 0.50 0.82 0.018 |
| 36. BD ( 1) C 17 - H 31 | /635. BD*( 1) C 18 - O 20 | 3.24 1.05 0.052 |
| 37. BD ( 1) C 18 - O 19 | /340. RY*( 2) C 17        | 0.72 1.97 0.034 |
| 37. BD ( 1) C 18 - O 19 | /629. BD*( 1) C 15 - C 17 | 1.02 1.53 0.035 |
| 38. BD ( 1) C 18 - O 20 | /340. RY*( 2) C 17        | 0.58 2.06 0.031 |
| 38. BD ( 1) C 18 - O 20 | /352. RY*( 1) C 18        | 1.58 1.90 0.049 |
| 38. BD ( 1) C 18 - O 20 | /632. BD*( 1) C 17 - C 18 | 1.40 1.42 0.040 |
| 38. BD ( 1) C 18 - O 20 | /633. BD*( 1) C 17 - H 31 | 0.88 1.44 0.032 |
| 39. BD ( 2) C 18 - O 20 | /342. RY*( 4) C 17        | 0.64 0.97 0.022 |
| 39. BD ( 2) C 18 - O 20 | /630. BD*( 2) C 15 - C 17 | 5.15 0.39 0.040 |
| 39. BD ( 2) C 18 - O 20 | /636. BD*( 2) C 18 - O 20 | 0.73 0.35 0.015 |
| 40. BD ( 1) O 19 - H 41 | /352. RY*( 1) C 18        | 0.95 1.62 0.035 |
| 40. BD ( 1) O 19 - H 41 | /353. RY*( 2) C 18        | 0.72 2.05 0.034 |
| 40. BD ( 1) O 19 - H 41 | /358. RY*( 7) C 18        | 0.69 2.04 0.034 |
| 40. BD ( 1) O 19 - H 41 | /632. BD*( 1) C 17 - C 18 | 3.65 1.15 0.058 |
| 40. BD ( 1) O 19 - H 41 | /635. BD*( 1) C 18 - O 20 | 1.29 1.24 0.036 |
| 41. BD ( 1) C 21 - O 22 | /391. RY*( 1) C 21        | 1.59 1.75 0.047 |
| 41. BD ( 1) C 21 - O 22 | /621. BD*( 1) C 12 - C 21 | 1.44 1.37 0.040 |
| 41. BD ( 1) C 21 - O 22 | /622. BD*( 1) C 12 - H 38 | 0.55 1.35 0.024 |
| 41. BD ( 1) C 21 - O 22 | /642. BD*( 1) N 23 - H 42 | 1.00 1.33 0.033 |
| 42. BD ( 2) C 21 - O 22 | /620. BD*( 1)Se 11 - C 12 | 3.08 0.46 0.034 |
| 42. BD ( 2) C 21 - O 22 | /622. BD*( 1) C 12 - H 38 | 1.41 0.74 0.029 |
| 42. BD ( 2) C 21 - O 22 | /639. BD*( 2) C 21 - O 22 | 0.74 0.38 0.016 |
| 43. BD ( 1) C 21 - N 23 | /274. RY*( 1) C 12        | 0.81 1.53 0.031 |
| 43. BD ( 1) C 21 - N 23 | /430. RY*( 1) C 24        | 0.93 2.03 0.039 |
| 43. BD ( 1) C 21 - N 23 | /431. RY*( 2) C 24        | 0.74 2.18 0.036 |
| 43. BD ( 1) C 21 - N 23 | /623. BD*( 1) C 12 - H 39 | 0.64 1.17 0.024 |
| 43. BD ( 1) C 21 - N 23 | /641. BD*( 1) N 23 - C 24 | 1.07 1.17 0.032 |
| 43. BD ( 1) C 21 - N 23 | /643. BD*( 1) C 24 - C 25 | 1.67 1.25 0.041 |
| 44. BD ( 1) N 23 - C 24 | /391. RY*( 1) C 21        | 1.66 1.54 0.045 |
| 44. BD ( 1) N 23 - C 24 | /443. RY*( 1) C 25        | 0.81 2.06 0.037 |
| 44. BD ( 1) N 23 - C 24 | /456. RY*( 1) C 26        | 0.64 2.04 0.032 |
| 44. BD ( 1) N 23 - C 24 | /621. BD*( 1) C 12 - C 21 | 1.81 1.17 0.041 |
| 44. BD ( 1) N 23 - C 24 | /640. BD*( 1) C 21 - N 23 | 0.91 1.15 0.029 |
| 44. BD ( 1) N 23 - C 24 | /643. BD*( 1) C 24 - C 25 | 0.62 1.24 0.025 |
| 44. BD ( 1) N 23 - C 24 | /644. BD*( 1) C 24 - C 26 | 2.05 1.43 0.048 |
| 44. BD ( 1) N 23 - C 24 | /646. BD*( 1) C 25 - C 27 | 0.83 1.44 0.031 |
| 44. BD ( 1) N 23 - C 24 | /649. BD*( 1) C 26 - C 28 | 2.10 1.26 0.046 |
| 45. BD ( 1) N 23 - H 42 | /392. RY*( 2) C 21        | 0.70 1.90 0.033 |
| 45. BD ( 1) N 23 - H 42 | /394. RY*( 4) C 21        | 0.93 2.51 0.043 |
| 45. BD ( 1) N 23 - H 42 | /430. RY*( 1) C 24        | 1.36 1.89 0.045 |
| 45. BD ( 1) N 23 - H 42 | /638. BD*( 1) C 21 - O 22 | 2.70 1.16 0.050 |
| 45. BD ( 1) N 23 - H 42 | /639. BD*( 2) C 21 - O 22 | 0.85 0.65 0.022 |
| 45. BD ( 1) N 23 - H 42 | /644. BD*( 1) C 24 - C 26 | 2.64 1.29 0.052 |
| 45. BD ( 1) N 23 - H 42 | /645. BD*( 2) C 24 - C 26 | 0.70 0.69 0.021 |
| 46. BD ( 1) C 24 - C 25 | /418. RY*( 2) N 23        | 1.03 1.54 0.036 |
| 46. BD ( 1) C 24 - C 25 | /456. RY*( 1) C 26        | 0.76 1.90 0.034 |
| 46. BD ( 1) C 24 - C 25 | /457. RY*( 2) C 26        | 0.58 1.90 0.030 |
| 46. BD ( 1) C 24 - C 25 | /469. RY*( 1) C 27        | 0.81 1.95 0.036 |

|                         |                           |                  |
|-------------------------|---------------------------|------------------|
| 46. BD ( 1) C 24 - C 25 | /470. RY*( 2) C 27        | 1.68 2.11 0.053  |
| 46. BD ( 1) C 24 - C 25 | /640. BD*( 1) C 21 - N 23 | 2.62 1.01 0.047  |
| 46. BD ( 1) C 24 - C 25 | /641. BD*( 1) N 23 - C 24 | 0.54 1.03 0.021  |
| 46. BD ( 1) C 24 - C 25 | /644. BD*( 1) C 24 - C 26 | 4.09 1.29 0.065  |
| 46. BD ( 1) C 24 - C 25 | /646. BD*( 1) C 25 - C 27 | 2.97 1.30 0.056  |
| 46. BD ( 1) C 24 - C 25 | /648. BD*( 1) C 25 - H 43 | 0.61 1.09 0.023  |
| 46. BD ( 1) C 24 - C 25 | /650. BD*( 1) C 26 - H 44 | 3.04 1.11 0.052  |
| 46. BD ( 1) C 24 - C 25 | /652. BD*( 1) C 27 - H 45 | 2.90 1.10 0.051  |
| 47. BD ( 1) C 24 - C 26 | /418. RY*( 2) N 23        | 0.68 1.63 0.030  |
| 47. BD ( 1) C 24 - C 26 | /443. RY*( 1) C 25        | 0.77 2.02 0.035  |
| 47. BD ( 1) C 24 - C 26 | /482. RY*( 1) C 28        | 0.85 2.03 0.037  |
| 47. BD ( 1) C 24 - C 26 | /483. RY*( 2) C 28        | 1.05 2.18 0.043  |
| 47. BD ( 1) C 24 - C 26 | /641. BD*( 1) N 23 - C 24 | 2.02 1.12 0.043  |
| 47. BD ( 1) C 24 - C 26 | /642. BD*( 1) N 23 - H 42 | 1.69 1.08 0.038  |
| 47. BD ( 1) C 24 - C 26 | /643. BD*( 1) C 24 - C 25 | 3.82 1.19 0.060  |
| 47. BD ( 1) C 24 - C 26 | /648. BD*( 1) C 25 - H 43 | 1.49 1.18 0.037  |
| 47. BD ( 1) C 24 - C 26 | /649. BD*( 1) C 26 - C 28 | 2.66 1.21 0.051  |
| 47. BD ( 1) C 24 - C 26 | /650. BD*( 1) C 26 - H 44 | 1.80 1.20 0.042  |
| 47. BD ( 1) C 24 - C 26 | /655. BD*( 1) C 28 - H 46 | 1.35 1.19 0.036  |
| 48. BD ( 2) C 24 - C 26 | /445. RY*( 3) C 25        | 1.40 1.07 0.037  |
| 48. BD ( 2) C 24 - C 26 | /485. RY*( 4) C 28        | 1.07 0.90 0.030  |
| 48. BD ( 2) C 24 - C 26 | /640. BD*( 1) C 21 - N 23 | 0.87 0.63 0.022  |
| 48. BD ( 2) C 24 - C 26 | /642. BD*( 1) N 23 - H 42 | 0.91 0.61 0.022  |
| 48. BD ( 2) C 24 - C 26 | /647. BD*( 2) C 25 - C 27 | 13.10 0.31 0.057 |
| 48. BD ( 2) C 24 - C 26 | /654. BD*( 2) C 28 - C 29 | 13.50 0.32 0.059 |
| 49. BD ( 1) C 25 - C 27 | /431. RY*( 2) C 24        | 1.93 2.13 0.057  |
| 49. BD ( 1) C 25 - C 27 | /495. RY*( 1) C 29        | 0.92 2.04 0.039  |
| 49. BD ( 1) C 25 - C 27 | /496. RY*( 2) C 29        | 0.95 2.18 0.041  |
| 49. BD ( 1) C 25 - C 27 | /641. BD*( 1) N 23 - C 24 | 3.00 1.12 0.052  |
| 49. BD ( 1) C 25 - C 27 | /643. BD*( 1) C 24 - C 25 | 2.90 1.20 0.053  |
| 49. BD ( 1) C 25 - C 27 | /648. BD*( 1) C 25 - H 43 | 1.74 1.18 0.040  |
| 49. BD ( 1) C 25 - C 27 | /651. BD*( 1) C 27 - C 29 | 2.54 1.22 0.050  |
| 49. BD ( 1) C 25 - C 27 | /652. BD*( 1) C 27 - H 45 | 1.53 1.19 0.038  |
| 49. BD ( 1) C 25 - C 27 | /656. BD*( 1) C 29 - H 47 | 1.57 1.19 0.039  |
| 50. BD ( 2) C 25 - C 27 | /434. RY*( 5) C 24        | 0.56 1.82 0.030  |
| 50. BD ( 2) C 25 - C 27 | /497. RY*( 3) C 29        | 1.38 0.90 0.033  |
| 50. BD ( 2) C 25 - C 27 | /645. BD*( 2) C 24 - C 26 | 13.36 0.32 0.059 |
| 50. BD ( 2) C 25 - C 27 | /654. BD*( 2) C 28 - C 29 | 12.36 0.32 0.056 |
| 51. BD ( 1) C 25 - H 43 | /430. RY*( 1) C 24        | 0.88 1.77 0.035  |
| 51. BD ( 1) C 25 - H 43 | /431. RY*( 2) C 24        | 0.78 1.92 0.035  |
| 51. BD ( 1) C 25 - H 43 | /469. RY*( 1) C 27        | 1.62 1.83 0.049  |
| 51. BD ( 1) C 25 - H 43 | /641. BD*( 1) N 23 - C 24 | 0.59 0.91 0.021  |
| 51. BD ( 1) C 25 - H 43 | /644. BD*( 1) C 24 - C 26 | 3.00 1.17 0.053  |
| 51. BD ( 1) C 25 - H 43 | /646. BD*( 1) C 25 - C 27 | 1.51 1.18 0.038  |
| 51. BD ( 1) C 25 - H 43 | /651. BD*( 1) C 27 - C 29 | 5.11 1.00 0.064  |
| 51. BD ( 1) C 25 - H 43 | /652. BD*( 1) C 27 - H 45 | 0.83 0.97 0.025  |
| 52. BD ( 1) C 26 - C 28 | /430. RY*( 1) C 24        | 1.90 1.88 0.054  |
| 52. BD ( 1) C 26 - C 28 | /495. RY*( 1) C 29        | 0.70 1.93 0.033  |
| 52. BD ( 1) C 26 - C 28 | /496. RY*( 2) C 29        | 1.59 2.07 0.052  |
| 52. BD ( 1) C 26 - C 28 | /641. BD*( 1) N 23 - C 24 | 5.67 1.02 0.068  |
| 52. BD ( 1) C 26 - C 28 | /644. BD*( 1) C 24 - C 26 | 3.18 1.28 0.057  |
| 52. BD ( 1) C 26 - C 28 | /650. BD*( 1) C 26 - H 44 | 0.59 1.10 0.023  |
| 52. BD ( 1) C 26 - C 28 | /653. BD*( 1) C 28 - C 29 | 2.78 1.30 0.054  |
| 52. BD ( 1) C 26 - C 28 | /656. BD*( 1) C 29 - H 47 | 3.29 1.09 0.054  |
| 53. BD ( 1) C 26 - H 44 | /431. RY*( 2) C 24        | 1.98 1.90 0.055  |

|                         |                           |                  |
|-------------------------|---------------------------|------------------|
| 53. BD ( 1) C 26 - H 44 | /482. RY*( 1) C 28        | 1.19 1.80 0.042  |
| 53. BD ( 1) C 26 - H 44 | /641. BD*( 1) N 23 - C 24 | 0.97 0.89 0.026  |
| 53. BD ( 1) C 26 - H 44 | /643. BD*( 1) C 24 - C 25 | 5.75 0.97 0.067  |
| 53. BD ( 1) C 26 - H 44 | /644. BD*( 1) C 24 - C 26 | 1.51 1.15 0.037  |
| 53. BD ( 1) C 26 - H 44 | /653. BD*( 1) C 28 - C 29 | 2.54 1.17 0.049  |
| 54. BD ( 1) C 27 - C 29 | /443. RY*( 1) C 25        | 0.59 1.92 0.030  |
| 54. BD ( 1) C 27 - C 29 | /444. RY*( 2) C 25        | 1.80 1.98 0.054  |
| 54. BD ( 1) C 27 - C 29 | /482. RY*( 1) C 28        | 0.76 1.94 0.034  |
| 54. BD ( 1) C 27 - C 29 | /483. RY*( 2) C 28        | 1.59 2.08 0.052  |
| 54. BD ( 1) C 27 - C 29 | /646. BD*( 1) C 25 - C 27 | 2.80 1.29 0.054  |
| 54. BD ( 1) C 27 - C 29 | /648. BD*( 1) C 25 - H 43 | 3.35 1.08 0.054  |
| 54. BD ( 1) C 27 - C 29 | /652. BD*( 1) C 27 - H 45 | 0.55 1.09 0.022  |
| 54. BD ( 1) C 27 - C 29 | /653. BD*( 1) C 28 - C 29 | 2.82 1.30 0.054  |
| 54. BD ( 1) C 27 - C 29 | /655. BD*( 1) C 28 - H 46 | 3.23 1.09 0.053  |
| 54. BD ( 1) C 27 - C 29 | /656. BD*( 1) C 29 - H 47 | 0.53 1.09 0.022  |
| 55. BD ( 1) C 27 - H 45 | /443. RY*( 1) C 25        | 1.63 1.80 0.049  |
| 55. BD ( 1) C 27 - H 45 | /495. RY*( 1) C 29        | 1.30 1.82 0.044  |
| 55. BD ( 1) C 27 - H 45 | /643. BD*( 1) C 24 - C 25 | 5.60 0.98 0.066  |
| 55. BD ( 1) C 27 - H 45 | /646. BD*( 1) C 25 - C 27 | 1.33 1.17 0.035  |
| 55. BD ( 1) C 27 - H 45 | /648. BD*( 1) C 25 - H 43 | 0.87 0.96 0.026  |
| 55. BD ( 1) C 27 - H 45 | /653. BD*( 1) C 28 - C 29 | 2.50 1.18 0.049  |
| 56. BD ( 1) C 28 - C 29 | /456. RY*( 1) C 26        | 0.95 1.99 0.039  |
| 56. BD ( 1) C 28 - C 29 | /457. RY*( 2) C 26        | 1.02 1.99 0.040  |
| 56. BD ( 1) C 28 - C 29 | /469. RY*( 1) C 27        | 0.88 2.04 0.038  |
| 56. BD ( 1) C 28 - C 29 | /470. RY*( 2) C 27        | 1.01 2.20 0.042  |
| 56. BD ( 1) C 28 - C 29 | /593. RY*( 1) H 47        | 0.51 1.20 0.022  |
| 56. BD ( 1) C 28 - C 29 | /649. BD*( 1) C 26 - C 28 | 2.41 1.21 0.048  |
| 56. BD ( 1) C 28 - C 29 | /650. BD*( 1) C 26 - H 44 | 1.44 1.20 0.037  |
| 56. BD ( 1) C 28 - C 29 | /651. BD*( 1) C 27 - C 29 | 2.54 1.21 0.050  |
| 56. BD ( 1) C 28 - C 29 | /652. BD*( 1) C 27 - H 45 | 1.60 1.19 0.039  |
| 56. BD ( 1) C 28 - C 29 | /655. BD*( 1) C 28 - H 46 | 1.60 1.19 0.039  |
| 56. BD ( 1) C 28 - C 29 | /656. BD*( 1) C 29 - H 47 | 1.67 1.19 0.040  |
| 57. BD ( 2) C 28 - C 29 | /458. RY*( 3) C 26        | 0.92 0.98 0.028  |
| 57. BD ( 2) C 28 - C 29 | /471. RY*( 3) C 27        | 1.38 1.08 0.037  |
| 57. BD ( 2) C 28 - C 29 | /645. BD*( 2) C 24 - C 26 | 13.01 0.31 0.057 |
| 57. BD ( 2) C 28 - C 29 | /647. BD*( 2) C 25 - C 27 | 14.20 0.31 0.059 |
| 58. BD ( 1) C 28 - H 46 | /456. RY*( 1) C 26        | 1.28 1.77 0.043  |
| 58. BD ( 1) C 28 - H 46 | /495. RY*( 1) C 29        | 1.66 1.81 0.049  |
| 58. BD ( 1) C 28 - H 46 | /644. BD*( 1) C 24 - C 26 | 2.72 1.16 0.050  |
| 58. BD ( 1) C 28 - H 46 | /651. BD*( 1) C 27 - C 29 | 5.31 0.99 0.065  |
| 58. BD ( 1) C 28 - H 46 | /653. BD*( 1) C 28 - C 29 | 1.31 1.18 0.035  |
| 58. BD ( 1) C 28 - H 46 | /656. BD*( 1) C 29 - H 47 | 0.85 0.97 0.026  |
| 59. BD ( 1) C 29 - H 47 | /469. RY*( 1) C 27        | 1.31 1.82 0.044  |
| 59. BD ( 1) C 29 - H 47 | /482. RY*( 1) C 28        | 1.70 1.81 0.050  |
| 59. BD ( 1) C 29 - H 47 | /646. BD*( 1) C 25 - C 27 | 2.57 1.17 0.049  |
| 59. BD ( 1) C 29 - H 47 | /649. BD*( 1) C 26 - C 28 | 5.28 0.99 0.065  |
| 59. BD ( 1) C 29 - H 47 | /653. BD*( 1) C 28 - C 29 | 1.34 1.18 0.036  |
| 59. BD ( 1) C 29 - H 47 | /655. BD*( 1) C 28 - H 46 | 0.84 0.97 0.026  |
| 60. CR ( 1) C 1         | /132. RY*( 2) C 2         | 0.95 11.44 0.093 |
| 60. CR ( 1) C 1         | /144. RY*( 1) C 3         | 0.55 11.95 0.073 |
| 60. CR ( 1) C 1         | /145. RY*( 2) C 3         | 1.67 11.40 0.123 |
| 60. CR ( 1) C 1         | /599. BD*( 1) C 1 - C 3   | 1.37 10.73 0.109 |
| 60. CR ( 1) C 1         | /602. BD*( 1) C 2 - C 4   | 0.57 10.77 0.070 |
| 60. CR ( 1) C 1         | /605. BD*( 1) C 3 - C 5   | 1.03 10.56 0.094 |
| 60. CR ( 1) C 1         | /606. BD*( 1) C 3 - C 7   | 1.11 10.53 0.098 |

|                  |                           |                  |
|------------------|---------------------------|------------------|
| 60. CR ( 1) C 1  | /624. BD*( 1) N 13 - C 14 | 1.02 10.48 0.094 |
| 61. CR ( 1) C 2  | /119. RY*( 2) C 1         | 1.36 11.36 0.111 |
| 61. CR ( 1) C 2  | /157. RY*( 1) C 4         | 0.60 11.21 0.073 |
| 61. CR ( 1) C 2  | /158. RY*( 2) C 4         | 1.71 11.23 0.124 |
| 61. CR ( 1) C 2  | /599. BD*( 1) C 1 - C 3   | 0.83 10.67 0.084 |
| 61. CR ( 1) C 2  | /601. BD*( 1) C 1 - N 13  | 0.54 10.42 0.067 |
| 61. CR ( 1) C 2  | /602. BD*( 1) C 2 - C 4   | 0.82 10.70 0.084 |
| 61. CR ( 1) C 2  | /607. BD*( 1) C 4 - C 6   | 1.32 10.51 0.106 |
| 62. CR ( 1) C 3  | /118. RY*( 1) C 1         | 1.15 11.27 0.102 |
| 62. CR ( 1) C 3  | /120. RY*( 3) C 1         | 0.99 11.33 0.095 |
| 62. CR ( 1) C 3  | /171. RY*( 2) C 5         | 0.74 11.04 0.081 |
| 62. CR ( 1) C 3  | /197. RY*( 2) C 7         | 0.60 11.52 0.074 |
| 62. CR ( 1) C 3  | /202. RY*( 7) C 7         | 0.84 11.20 0.086 |
| 62. CR ( 1) C 3  | /598. BD*( 1) C 1 - C 2   | 1.09 10.52 0.096 |
| 62. CR ( 1) C 3  | /599. BD*( 1) C 1 - C 3   | 1.23 10.69 0.103 |
| 62. CR ( 1) C 3  | /601. BD*( 1) C 1 - N 13  | 1.02 10.44 0.093 |
| 62. CR ( 1) C 3  | /609. BD*( 1) C 5 - C 6   | 0.72 10.72 0.079 |
| 62. CR ( 1) C 3  | /613. BD*( 1) C 7 - O 8   | 0.61 10.36 0.073 |
| 63. CR ( 1) C 4  | /132. RY*( 2) C 2         | 1.34 11.38 0.110 |
| 63. CR ( 1) C 4  | /134. RY*( 4) C 2         | 0.65 11.07 0.076 |
| 63. CR ( 1) C 4  | /184. RY*( 2) C 6         | 1.29 10.89 0.106 |
| 63. CR ( 1) C 4  | /186. RY*( 4) C 6         | 0.62 11.13 0.074 |
| 63. CR ( 1) C 4  | /598. BD*( 1) C 1 - C 2   | 1.20 10.49 0.101 |
| 63. CR ( 1) C 4  | /602. BD*( 1) C 2 - C 4   | 0.67 10.70 0.076 |
| 63. CR ( 1) C 4  | /609. BD*( 1) C 5 - C 6   | 0.83 10.69 0.084 |
| 63. CR ( 1) C 4  | /612. BD*( 1) C 6 -Se 11  | 0.84 10.18 0.083 |
| 64. CR ( 1) C 5  | /145. RY*( 2) C 3         | 0.79 11.34 0.085 |
| 64. CR ( 1) C 5  | /183. RY*( 1) C 6         | 1.13 11.12 0.100 |
| 64. CR ( 1) C 5  | /184. RY*( 2) C 6         | 1.86 10.89 0.127 |
| 64. CR ( 1) C 5  | /185. RY*( 3) C 6         | 0.52 10.89 0.067 |
| 64. CR ( 1) C 5  | /599. BD*( 1) C 1 - C 3   | 0.76 10.67 0.081 |
| 64. CR ( 1) C 5  | /606. BD*( 1) C 3 - C 7   | 0.65 10.47 0.075 |
| 64. CR ( 1) C 5  | /607. BD*( 1) C 4 - C 6   | 1.23 10.51 0.102 |
| 64. CR ( 1) C 5  | /609. BD*( 1) C 5 - C 6   | 1.20 10.69 0.102 |
| 64. CR ( 1) C 5  | /612. BD*( 1) C 6 -Se 11  | 1.28 10.18 0.103 |
| 65. CR ( 1) C 6  | /158. RY*( 2) C 4         | 1.04 11.27 0.097 |
| 65. CR ( 1) C 6  | /171. RY*( 2) C 5         | 2.13 11.06 0.137 |
| 65. CR ( 1) C 6  | /173. RY*( 4) C 5         | 0.60 11.16 0.073 |
| 65. CR ( 1) C 6  | /602. BD*( 1) C 2 - C 4   | 0.62 10.74 0.073 |
| 65. CR ( 1) C 6  | /605. BD*( 1) C 3 - C 5   | 1.16 10.53 0.099 |
| 65. CR ( 1) C 6  | /609. BD*( 1) C 5 - C 6   | 1.22 10.73 0.103 |
| 65. CR ( 1) C 6  | /611. BD*( 1) C 5 - H 34  | 0.55 10.54 0.068 |
| 65. CR ( 1) C 6  | /612. BD*( 1) C 6 -Se 11  | 1.33 10.22 0.105 |
| 66. CR ( 1) C 7  | /144. RY*( 1) C 3         | 1.20 12.05 0.108 |
| 66. CR ( 1) C 7  | /599. BD*( 1) C 1 - C 3   | 0.88 10.83 0.087 |
| 66. CR ( 1) C 7  | /605. BD*( 1) C 3 - C 5   | 0.54 10.65 0.068 |
| 66. CR ( 1) C 7  | /606. BD*( 1) C 3 - C 7   | 0.55 10.63 0.069 |
| 66. CR ( 1) C 7  | /613. BD*( 1) C 7 - O 8   | 0.67 10.49 0.077 |
| 66. CR ( 1) C 7  | /616. BD*( 1) O 8 - C 10  | 1.10 10.48 0.096 |
| 67. CR ( 1) O 8  | /196. RY*( 1) C 7         | 1.02 19.92 0.127 |
| 67. CR ( 1) O 8  | /197. RY*( 2) C 7         | 1.09 20.43 0.133 |
| 67. CR ( 1) O 8  | /237. RY*( 3) C 10        | 0.91 19.96 0.121 |
| 68. CR ( 1) O 9  | /196. RY*( 1) C 7         | 5.25 19.81 0.289 |
| 68. CR ( 1) O 9  | /606. BD*( 1) C 3 - C 7   | 0.79 19.29 0.111 |
| 69. CR ( 1) C 10 | /544. RY*( 2) H 37        | 0.56 12.17 0.074 |

|                  |                           |                  |
|------------------|---------------------------|------------------|
| 69. CR ( 1) C 10 | /613. BD*( 1) C 7 - O 8   | 1.11 10.39 0.098 |
| 69. CR ( 1) C 10 | /616. BD*( 1) O 8 - C 10  | 1.50 10.39 0.112 |
| 72. CR ( 3)Se 11 | /183. RY*( 1) C 6         | 0.96 11.37 0.093 |
| 72. CR ( 3)Se 11 | /607. BD*( 1) C 4 - C 6   | 0.74 10.76 0.080 |
| 72. CR ( 3)Se 11 | /609. BD*( 1) C 5 - C 6   | 1.23 10.94 0.104 |
| 84. CR ( 1) C 12 | /392. RY*( 2) C 21        | 1.09 11.36 0.100 |
| 84. CR ( 1) C 12 | /620. BD*( 1)Se 11 - C 12 | 1.05 10.19 0.093 |
| 84. CR ( 1) C 12 | /640. BD*( 1) C 21 - N 23 | 0.60 10.47 0.073 |
| 85. CR ( 1) N 13 | /118. RY*( 1) C 1         | 1.12 15.41 0.117 |
| 85. CR ( 1) N 13 | /119. RY*( 2) C 1         | 0.53 15.52 0.081 |
| 85. CR ( 1) N 13 | /301. RY*( 2) C 14        | 1.44 15.60 0.134 |
| 85. CR ( 1) N 13 | /599. BD*( 1) C 1 - C 3   | 0.59 14.83 0.084 |
| 86. CR ( 1) C 14 | /314. RY*( 2) C 15        | 0.56 11.28 0.071 |
| 86. CR ( 1) C 14 | /601. BD*( 1) C 1 - N 13  | 1.15 10.56 0.099 |
| 86. CR ( 1) C 14 | /629. BD*( 1) C 15 - C 17 | 0.65 10.81 0.075 |
| 87. CR ( 1) C 15 | /301. RY*( 2) C 14        | 1.06 11.46 0.099 |
| 87. CR ( 1) C 15 | /340. RY*( 2) C 17        | 1.86 11.14 0.129 |
| 87. CR ( 1) C 15 | /341. RY*( 3) C 17        | 0.53 11.25 0.069 |
| 87. CR ( 1) C 15 | /624. BD*( 1) N 13 - C 14 | 0.51 10.44 0.067 |
| 87. CR ( 1) C 15 | /629. BD*( 1) C 15 - C 17 | 0.66 10.70 0.075 |
| 87. CR ( 1) C 15 | /632. BD*( 1) C 17 - C 18 | 1.06 10.50 0.095 |
| 88. CR ( 1) O 16 | /300. RY*( 1) C 14        | 5.53 19.74 0.296 |
| 88. CR ( 1) O 16 | /626. BD*( 1) C 14 - C 15 | 0.75 19.29 0.109 |
| 89. CR ( 1) C 17 | /314. RY*( 2) C 15        | 1.59 11.17 0.119 |
| 89. CR ( 1) C 17 | /315. RY*( 3) C 15        | 0.70 11.38 0.080 |
| 89. CR ( 1) C 17 | /353. RY*( 2) C 18        | 0.78 11.40 0.085 |
| 89. CR ( 1) C 17 | /358. RY*( 7) C 18        | 0.58 11.39 0.073 |
| 89. CR ( 1) C 17 | /626. BD*( 1) C 14 - C 15 | 1.08 10.50 0.096 |
| 89. CR ( 1) C 17 | /629. BD*( 1) C 15 - C 17 | 0.72 10.70 0.079 |
| 89. CR ( 1) C 17 | /631. BD*( 1) C 15 - H 30 | 0.53 10.50 0.067 |
| 90. CR ( 1) C 18 | /340. RY*( 2) C 17        | 0.55 11.28 0.071 |
| 90. CR ( 1) C 18 | /629. BD*( 1) C 15 - C 17 | 0.63 10.84 0.074 |
| 90. CR ( 1) C 18 | /634. BD*( 1) C 18 - O 19 | 0.63 10.51 0.074 |
| 91. CR ( 1) O 19 | /352. RY*( 1) C 18        | 0.80 19.88 0.113 |
| 91. CR ( 1) O 19 | /353. RY*( 2) C 18        | 1.52 20.31 0.157 |
| 91. CR ( 1) O 19 | /355. RY*( 4) C 18        | 0.64 21.26 0.104 |
| 91. CR ( 1) O 19 | /566. RY*( 4) H 41        | 0.56 20.96 0.097 |
| 92. CR ( 1) O 20 | /352. RY*( 1) C 18        | 5.57 19.77 0.297 |
| 92. CR ( 1) O 20 | /632. BD*( 1) C 17 - C 18 | 0.75 19.29 0.109 |
| 93. CR ( 1) C 21 | /276. RY*( 3) C 12        | 1.04 10.99 0.096 |
| 93. CR ( 1) C 21 | /641. BD*( 1) N 23 - C 24 | 1.15 10.57 0.099 |
| 94. CR ( 1) O 22 | /391. RY*( 1) C 21        | 5.94 19.61 0.306 |
| 94. CR ( 1) O 22 | /621. BD*( 1) C 12 - C 21 | 0.84 19.24 0.115 |
| 95. CR ( 1) N 23 | /392. RY*( 2) C 21        | 1.76 15.46 0.147 |
| 95. CR ( 1) N 23 | /430. RY*( 1) C 24        | 0.59 15.45 0.085 |
| 95. CR ( 1) N 23 | /431. RY*( 2) C 24        | 0.67 15.60 0.092 |
| 95. CR ( 1) N 23 | /433. RY*( 4) C 24        | 0.88 15.39 0.104 |
| 95. CR ( 1) N 23 | /570. RY*( 3) H 42        | 0.51 16.47 0.082 |
| 95. CR ( 1) N 23 | /644. BD*( 1) C 24 - C 26 | 0.58 14.85 0.083 |
| 96. CR ( 1) C 24 | /444. RY*( 2) C 25        | 0.92 11.43 0.092 |
| 96. CR ( 1) C 24 | /457. RY*( 2) C 26        | 1.85 11.35 0.130 |
| 96. CR ( 1) C 24 | /640. BD*( 1) C 21 - N 23 | 1.08 10.46 0.097 |
| 96. CR ( 1) C 24 | /644. BD*( 1) C 24 - C 26 | 1.41 10.74 0.111 |
| 96. CR ( 1) C 24 | /646. BD*( 1) C 25 - C 27 | 0.57 10.75 0.070 |
| 96. CR ( 1) C 24 | /649. BD*( 1) C 26 - C 28 | 0.92 10.57 0.089 |

|                   |                           |                  |
|-------------------|---------------------------|------------------|
| 96. CR ( 1) C 24  | /650. BD*( 1) C 26 - H 44 | 0.52 10.56 0.066 |
| 97. CR ( 1) C 25  | /430. RY*( 1) C 24        | 1.21 11.29 0.104 |
| 97. CR ( 1) C 25  | /470. RY*( 2) C 27        | 2.12 11.50 0.140 |
| 97. CR ( 1) C 25  | /574. RY*( 2) H 43        | 0.52 12.32 0.071 |
| 97. CR ( 1) C 25  | /641. BD*( 1) N 23 - C 24 | 0.57 10.43 0.069 |
| 97. CR ( 1) C 25  | /644. BD*( 1) C 24 - C 26 | 0.75 10.68 0.080 |
| 97. CR ( 1) C 25  | /646. BD*( 1) C 25 - C 27 | 0.83 10.70 0.084 |
| 97. CR ( 1) C 25  | /651. BD*( 1) C 27 - C 29 | 1.06 10.52 0.095 |
| 98. CR ( 1) C 26  | /431. RY*( 2) C 24        | 2.59 11.43 0.154 |
| 98. CR ( 1) C 26  | /483. RY*( 2) C 28        | 0.79 11.48 0.085 |
| 98. CR ( 1) C 26  | /641. BD*( 1) N 23 - C 24 | 1.03 10.42 0.093 |
| 98. CR ( 1) C 26  | /643. BD*( 1) C 24 - C 25 | 1.21 10.49 0.101 |
| 98. CR ( 1) C 26  | /644. BD*( 1) C 24 - C 26 | 0.73 10.68 0.079 |
| 98. CR ( 1) C 26  | /653. BD*( 1) C 28 - C 29 | 0.64 10.70 0.074 |
| 99. CR ( 1) C 27  | /444. RY*( 2) C 25        | 1.57 11.38 0.119 |
| 99. CR ( 1) C 27  | /446. RY*( 4) C 25        | 0.51 11.00 0.067 |
| 99. CR ( 1) C 27  | /496. RY*( 2) C 29        | 0.81 11.48 0.086 |
| 99. CR ( 1) C 27  | /584. RY*( 2) H 45        | 0.58 12.28 0.075 |
| 99. CR ( 1) C 27  | /643. BD*( 1) C 24 - C 25 | 1.18 10.50 0.100 |
| 99. CR ( 1) C 27  | /646. BD*( 1) C 25 - C 27 | 0.75 10.70 0.080 |
| 99. CR ( 1) C 27  | /648. BD*( 1) C 25 - H 43 | 0.53 10.48 0.067 |
| 99. CR ( 1) C 27  | /653. BD*( 1) C 28 - C 29 | 0.62 10.70 0.073 |
| 100. CR ( 1) C 28 | /496. RY*( 2) C 29        | 2.11 11.48 0.139 |
| 100. CR ( 1) C 28 | /589. RY*( 2) H 46        | 0.55 12.28 0.073 |
| 100. CR ( 1) C 28 | /644. BD*( 1) C 24 - C 26 | 0.69 10.68 0.077 |
| 100. CR ( 1) C 28 | /651. BD*( 1) C 27 - C 29 | 1.07 10.51 0.095 |
| 100. CR ( 1) C 28 | /653. BD*( 1) C 28 - C 29 | 0.82 10.70 0.084 |
| 100. CR ( 1) C 28 | /656. BD*( 1) C 29 - H 47 | 0.51 10.49 0.066 |
| 101. CR ( 1) C 29 | /470. RY*( 2) C 27        | 0.77 11.49 0.084 |
| 101. CR ( 1) C 29 | /483. RY*( 2) C 28        | 2.14 11.48 0.140 |
| 101. CR ( 1) C 29 | /594. RY*( 2) H 47        | 0.56 12.28 0.074 |
| 101. CR ( 1) C 29 | /646. BD*( 1) C 25 - C 27 | 0.63 10.69 0.073 |
| 101. CR ( 1) C 29 | /649. BD*( 1) C 26 - C 28 | 1.04 10.51 0.094 |
| 101. CR ( 1) C 29 | /653. BD*( 1) C 28 - C 29 | 0.80 10.70 0.083 |
| 101. CR ( 1) C 29 | /655. BD*( 1) C 28 - H 46 | 0.50 10.49 0.065 |
| 102. LP ( 1) O 8  | /196. RY*( 1) C 7         | 1.66 1.51 0.045  |
| 102. LP ( 1) O 8  | /199. RY*( 4) C 7         | 1.63 2.60 0.058  |
| 102. LP ( 1) O 8  | /235. RY*( 1) C 10        | 1.64 1.66 0.047  |
| 102. LP ( 1) O 8  | /237. RY*( 3) C 10        | 0.79 1.55 0.031  |
| 102. LP ( 1) O 8  | /614. BD*( 1) C 7 - O 9   | 5.71 1.08 0.070  |
| 102. LP ( 1) O 8  | /617. BD*( 1) C 10 - H 35 | 0.63 0.95 0.022  |
| 102. LP ( 1) O 8  | /619. BD*( 1) C 10 - H 37 | 2.36 0.95 0.043  |
| 103. LP ( 2) O 8  | /198. RY*( 3) C 7         | 1.81 1.84 0.054  |
| 103. LP ( 2) O 8  | /236. RY*( 2) C 10        | 1.51 1.50 0.045  |
| 103. LP ( 2) O 8  | /615. BD*( 2) C 7 - O 9   | 38.70 0.31 0.100 |
| 103. LP ( 2) O 8  | /617. BD*( 1) C 10 - H 35 | 5.02 0.70 0.056  |
| 103. LP ( 2) O 8  | /618. BD*( 1) C 10 - H 36 | 5.02 0.70 0.055  |
| 104. LP ( 1) O 9  | /196. RY*( 1) C 7         | 12.30 1.65 0.127 |
| 104. LP ( 1) O 9  | /606. BD*( 1) C 3 - C 7   | 2.25 1.13 0.045  |
| 104. LP ( 1) O 9  | /613. BD*( 1) C 7 - O 8   | 0.98 0.99 0.028  |
| 105. LP ( 2) O 9  | /197. RY*( 2) C 7         | 1.95 1.71 0.053  |
| 105. LP ( 2) O 9  | /199. RY*( 4) C 7         | 1.69 2.28 0.057  |
| 105. LP ( 2) O 9  | /606. BD*( 1) C 3 - C 7   | 12.51 0.68 0.084 |
| 105. LP ( 2) O 9  | /613. BD*( 1) C 7 - O 8   | 28.81 0.55 0.113 |
| 105. LP ( 2) O 9  | /619. BD*( 1) C 10 - H 37 | 0.80 0.64 0.021  |

|                        |                           |                  |
|------------------------|---------------------------|------------------|
| 106. LP ( 1)Se 11      | /183. RY*( 1) C 6         | 1.15 1.78 0.040  |
| 106. LP ( 1)Se 11      | /609. BD*( 1) C 5 - C 6   | 3.29 1.36 0.060  |
| 107. LP ( 2)Se 11      | /607. BD*( 1) C 4 - C 6   | 1.59 0.70 0.030  |
| 107. LP ( 2)Se 11      | /609. BD*( 1) C 5 - C 6   | 1.04 0.88 0.028  |
| 107. LP ( 2)Se 11      | /610. BD*( 2) C 5 - C 6   | 9.08 0.27 0.045  |
| 107. LP ( 2)Se 11      | /622. BD*( 1) C 12 - H 38 | 2.39 0.61 0.035  |
| 107. LP ( 2)Se 11      | /623. BD*( 1) C 12 - H 39 | 3.92 0.62 0.045  |
| 108. LP ( 1) N 13      | /120. RY*( 3) C 1         | 1.11 1.52 0.040  |
| 108. LP ( 1) N 13      | /121. RY*( 4) C 1         | 0.73 1.59 0.033  |
| 108. LP ( 1) N 13      | /302. RY*( 3) C 14        | 1.60 1.72 0.051  |
| 108. LP ( 1) N 13      | /559. RY*( 2) H 40        | 0.75 1.95 0.037  |
| 108. LP ( 1) N 13      | /598. BD*( 1) C 1 - C 2   | 3.68 0.71 0.049  |
| 108. LP ( 1) N 13      | /599. BD*( 1) C 1 - C 3   | 2.77 0.89 0.048  |
| 108. LP ( 1) N 13      | /600. BD*( 2) C 1 - C 3   | 17.51 0.30 0.065 |
| 108. LP ( 1) N 13      | /628. BD*( 2) C 14 - O 16 | 50.61 0.26 0.102 |
| 109. LP ( 1) O 16      | /300. RY*( 1) C 14        | 13.17 1.58 0.129 |
| 109. LP ( 1) O 16      | /624. BD*( 1) N 13 - C 14 | 1.20 1.06 0.032  |
| 109. LP ( 1) O 16      | /626. BD*( 1) C 14 - C 15 | 2.16 1.13 0.044  |
| 110. LP ( 2) O 16      | /301. RY*( 2) C 14        | 1.40 1.64 0.044  |
| 110. LP ( 2) O 16      | /303. RY*( 4) C 14        | 1.82 2.67 0.064  |
| 110. LP ( 2) O 16      | /624. BD*( 1) N 13 - C 14 | 23.97 0.62 0.110 |
| 110. LP ( 2) O 16      | /626. BD*( 1) C 14 - C 15 | 14.70 0.68 0.091 |
| 111. LP ( 1) O 19      | /352. RY*( 1) C 18        | 2.40 1.52 0.054  |
| 111. LP ( 1) O 19      | /355. RY*( 4) C 18        | 1.67 2.90 0.062  |
| 111. LP ( 1) O 19      | /565. RY*( 3) H 41        | 1.30 2.29 0.049  |
| 111. LP ( 1) O 19      | /635. BD*( 1) C 18 - O 20 | 5.36 1.14 0.070  |
| 112. LP ( 2) O 19      | /354. RY*( 3) C 18        | 2.04 1.85 0.057  |
| 112. LP ( 2) O 19      | /564. RY*( 2) H 41        | 1.56 1.81 0.050  |
| 112. LP ( 2) O 19      | /636. BD*( 2) C 18 - O 20 | 40.59 0.32 0.103 |
| 113. LP ( 1) O 20      | /352. RY*( 1) C 18        | 13.28 1.61 0.131 |
| 113. LP ( 1) O 20      | /632. BD*( 1) C 17 - C 18 | 2.18 1.14 0.045  |
| 113. LP ( 1) O 20      | /634. BD*( 1) C 18 - O 19 | 0.84 1.01 0.026  |
| 114. LP ( 2) O 20      | /353. RY*( 2) C 18        | 2.69 1.59 0.060  |
| 114. LP ( 2) O 20      | /355. RY*( 4) C 18        | 1.04 2.54 0.047  |
| 114. LP ( 2) O 20      | /632. BD*( 1) C 17 - C 18 | 13.36 0.69 0.087 |
| 114. LP ( 2) O 20      | /634. BD*( 1) C 18 - O 19 | 27.85 0.56 0.112 |
| 115. LP ( 1) O 22      | /391. RY*( 1) C 21        | 14.07 1.45 0.128 |
| 115. LP ( 1) O 22      | /621. BD*( 1) C 12 - C 21 | 2.48 1.08 0.047  |
| 115. LP ( 1) O 22      | /640. BD*( 1) C 21 - N 23 | 1.37 1.06 0.034  |
| 116. LP ( 2) O 22      | /392. RY*( 2) C 21        | 1.82 1.51 0.048  |
| 116. LP ( 2) O 22      | /394. RY*( 4) C 21        | 1.52 2.12 0.052  |
| 116. LP ( 2) O 22      | /395. RY*( 5) C 21        | 0.73 1.74 0.033  |
| 116. LP ( 2) O 22      | /621. BD*( 1) C 12 - C 21 | 14.51 0.64 0.088 |
| 116. LP ( 2) O 22      | /640. BD*( 1) C 21 - N 23 | 24.14 0.62 0.110 |
| 117. LP ( 1) N 23      | /393. RY*( 3) C 21        | 1.47 1.65 0.048  |
| 117. LP ( 1) N 23      | /398. RY*( 8) C 21        | 0.57 1.81 0.031  |
| 117. LP ( 1) N 23      | /432. RY*( 3) C 24        | 1.80 1.48 0.050  |
| 117. LP ( 1) N 23      | /569. RY*( 2) H 42        | 0.92 1.87 0.040  |
| 117. LP ( 1) N 23      | /638. BD*( 1) C 21 - O 22 | 1.75 0.78 0.035  |
| 117. LP ( 1) N 23      | /639. BD*( 2) C 21 - O 22 | 42.53 0.27 0.096 |
| 117. LP ( 1) N 23      | /643. BD*( 1) C 24 - C 25 | 2.00 0.72 0.036  |
| 117. LP ( 1) N 23      | /644. BD*( 1) C 24 - C 26 | 1.50 0.91 0.036  |
| 117. LP ( 1) N 23      | /645. BD*( 2) C 24 - C 26 | 20.75 0.31 0.073 |
| 600. BD*( 2) C 1 - C 3 | /122. RY*( 5) C 1         | 1.04 1.30 0.084  |
| 600. BD*( 2) C 1 - C 3 | /147. RY*( 4) C 3         | 0.86 0.75 0.058  |

|                          |                            |        |      |       |
|--------------------------|----------------------------|--------|------|-------|
| 600. BD*( 2) C 1 - C 3   | /603. BD*( 2) C 2 - C 4    | 130.80 | 0.01 | 0.072 |
| 600. BD*( 2) C 1 - C 3   | /613. BD*( 1) C 7 - O 8    | 0.82   | 0.25 | 0.028 |
| 600. BD*( 2) C 1 - C 3   | /624. BD*( 1) N 13 - C 14  | 0.70   | 0.33 | 0.031 |
| 600. BD*( 2) C 1 - C 3   | /625. BD*( 1) N 13 - H 40  | 0.95   | 0.31 | 0.038 |
| 603. BD*( 2) C 2 - C 4   | /133. RY*( 3) C 2          | 0.79   | 0.69 | 0.069 |
| 603. BD*( 2) C 2 - C 4   | /161. RY*( 5) C 4          | 0.84   | 1.38 | 0.101 |
| 610. BD*( 2) C 5 - C 6   | /172. RY*( 3) C 5          | 2.89   | 0.53 | 0.099 |
| 610. BD*( 2) C 5 - C 6   | /185. RY*( 3) C 6          | 0.71   | 0.81 | 0.060 |
| 610. BD*( 2) C 5 - C 6   | /603. BD*( 2) C 2 - C 4    | 123.76 | 0.01 | 0.071 |
| 610. BD*( 2) C 5 - C 6   | /620. BD*( 1) Se 11 - C 12 | 1.27   | 0.07 | 0.022 |
| 613. BD*( 1) C 7 - O 8   | /197. RY*( 2) C 7          | 1.59   | 1.16 | 0.163 |
| 613. BD*( 1) C 7 - O 8   | /209. RY*( 1) O 8          | 0.57   | 1.05 | 0.094 |
| 613. BD*( 1) C 7 - O 8   | /605. BD*( 1) C 3 - C 5    | 1.07   | 0.16 | 0.046 |
| 613. BD*( 1) C 7 - O 8   | /606. BD*( 1) C 3 - C 7    | 0.81   | 0.14 | 0.034 |
| 613. BD*( 1) C 7 - O 8   | /614. BD*( 1) C 7 - O 9    | 0.52   | 0.22 | 0.039 |
| 615. BD*( 2) C 7 - O 9   | /198. RY*( 3) C 7          | 1.50   | 1.53 | 0.119 |
| 615. BD*( 2) C 7 - O 9   | /223. RY*( 2) O 9          | 1.09   | 0.98 | 0.082 |
| 615. BD*( 2) C 7 - O 9   | /600. BD*( 2) C 1 - C 3    | 35.74  | 0.04 | 0.068 |
| 628. BD*( 2) C 14 - O 16 | /302. RY*( 3) C 14         | 1.50   | 1.47 | 0.107 |
| 628. BD*( 2) C 14 - O 16 | /306. RY*( 7) C 14         | 1.52   | 1.02 | 0.091 |
| 628. BD*( 2) C 14 - O 16 | /327. RY*( 2) O 16         | 1.40   | 1.02 | 0.087 |
| 628. BD*( 2) C 14 - O 16 | /630. BD*( 2) C 15 - C 17  | 44.98  | 0.03 | 0.076 |
| 636. BD*( 2) C 18 - O 20 | /354. RY*( 3) C 18         | 1.59   | 1.54 | 0.123 |
| 636. BD*( 2) C 18 - O 20 | /360. RY*( 9) C 18         | 1.00   | 0.76 | 0.069 |
| 636. BD*( 2) C 18 - O 20 | /379. RY*( 2) O 20         | 1.01   | 1.02 | 0.080 |
| 636. BD*( 2) C 18 - O 20 | /630. BD*( 2) C 15 - C 17  | 29.86  | 0.04 | 0.075 |
| 639. BD*( 2) C 21 - O 22 | /393. RY*( 3) C 21         | 1.19   | 1.38 | 0.099 |
| 639. BD*( 2) C 21 - O 22 | /405. RY*( 2) O 22         | 1.15   | 0.97 | 0.083 |
| 639. BD*( 2) C 21 - O 22 | /612. BD*( 1) C 6 - Se 11  | 0.51   | 0.11 | 0.018 |
| 639. BD*( 2) C 21 - O 22 | /620. BD*( 1) Se 11 - C 12 | 5.16   | 0.08 | 0.049 |
| 639. BD*( 2) C 21 - O 22 | /622. BD*( 1) C 12 - H 38  | 0.69   | 0.36 | 0.038 |
| 639. BD*( 2) C 21 - O 22 | /638. BD*( 1) C 21 - O 22  | 2.41   | 0.51 | 0.083 |
| 645. BD*( 2) C 24 - C 26 | /435. RY*( 6) C 24         | 0.84   | 1.29 | 0.081 |
| 645. BD*( 2) C 24 - C 26 | /458. RY*( 3) C 26         | 1.78   | 0.67 | 0.085 |
| 645. BD*( 2) C 24 - C 26 | /640. BD*( 1) C 21 - N 23  | 0.57   | 0.31 | 0.029 |
| 647. BD*( 2) C 25 - C 27 | /445. RY*( 3) C 25         | 0.54   | 0.76 | 0.054 |
| 647. BD*( 2) C 25 - C 27 | /447. RY*( 5) C 25         | 0.73   | 1.45 | 0.087 |
| 647. BD*( 2) C 25 - C 27 | /471. RY*( 3) C 27         | 0.56   | 0.77 | 0.056 |
| 647. BD*( 2) C 25 - C 27 | /472. RY*( 4) C 27         | 0.78   | 1.43 | 0.090 |
| 654. BD*( 2) C 28 - C 29 | /485. RY*( 4) C 28         | 1.75   | 0.58 | 0.086 |
| 654. BD*( 2) C 28 - C 29 | /497. RY*( 3) C 29         | 1.37   | 0.58 | 0.075 |

# NATURAL BOND ORBITAL ANALYSIS:

| Cycle | Thresh. | Occupancies |           | Lewis Structure |     | Low |    | High |      | Dev  |
|-------|---------|-------------|-----------|-----------------|-----|-----|----|------|------|------|
|       |         | Occ.        | -----     | -----           | occ | occ |    |      |      |      |
|       |         | Lewis       | Non-Lewis | CR              | BD  | 3C  | LP | (L)  | (NL) |      |
| ===== |         |             |           |                 |     |     |    |      |      |      |
| 1(1)  | 1.90    | 222.98911   | 11.01089  | 42              | 57  | 0   | 18 | 23   | 16   | 0.81 |
| 2(2)  | 1.90    | 222.98911   | 11.01089  | 42              | 57  | 0   | 18 | 23   | 16   | 0.81 |
| 3(1)  | 1.80    | 226.07281   | 7.92719   | 42              | 55  | 0   | 20 | 6    | 11   | 0.64 |
| 4(2)  | 1.80    | 226.07281   | 7.92719   | 42              | 55  | 0   | 20 | 6    | 11   | 0.64 |
| 5(1)  | 1.70    | 229.10645   | 4.89355   | 42              | 59  | 0   | 16 | 1    | 11   | 0.49 |
| 6(2)  | 1.70    | 229.68741   | 4.31259   | 42              | 59  | 0   | 16 | 1    | 11   | 0.26 |

|       |      |           |         |    |    |   |    |   |    |      |
|-------|------|-----------|---------|----|----|---|----|---|----|------|
| 7(3)  | 1.70 | 229.68741 | 4.31259 | 42 | 59 | 0 | 16 | 1 | 11 | 0.26 |
| 8(1)  | 1.60 | 229.69356 | 4.30644 | 42 | 59 | 0 | 16 | 0 | 11 | 0.26 |
| 9(2)  | 1.60 | 229.69356 | 4.30644 | 42 | 59 | 0 | 16 | 0 | 11 | 0.26 |
| 10(1) | 1.50 | 228.43709 | 5.56291 | 42 | 58 | 0 | 17 | 0 | 13 | 0.74 |
| 11(2) | 1.50 | 228.43709 | 5.56291 | 42 | 58 | 0 | 17 | 0 | 13 | 0.74 |
| 12(1) | 1.60 | 229.69356 | 4.30644 | 42 | 59 | 0 | 16 | 0 | 11 | 0.26 |

-----

-----

|                   |                             |
|-------------------|-----------------------------|
| Core              | 83.97523 ( 99.971% of 84)   |
| Valence Lewis     | 145.71833 ( 97.146% of 150) |
| =====             |                             |
| Total Lewis       | 229.69356 ( 98.160% of 234) |
| -----             |                             |
| Valence non-Lewis | 3.86669 ( 1.652% of 234)    |
| Rydberg non-Lewis | 0.43975 ( 0.188% of 234)    |
| =====             |                             |
| Total non-Lewis   | 4.30644 ( 1.840% of 234)    |

-----

## Compound 12

### Second Order Perturbation Theory Analysis of Fock Matrix in NBO Basis

Threshold for printing: 0.50 kcal/mol

| Donor NBO (i)        | Acceptor NBO (j)          | E(2)     | E(j)-E(i) | F(i,j) |  |  |
|----------------------|---------------------------|----------|-----------|--------|--|--|
|                      |                           | kcal/mol | a.u.      | a.u.   |  |  |
| =====                |                           |          |           |        |  |  |
| =====                |                           |          |           |        |  |  |
| within unit 1        |                           |          |           |        |  |  |
| 1. BD ( 1) C 1 - C 2 | /145. RY*( 1) C 3         | 0.69     | 2.49      | 0.037  |  |  |
| 1. BD ( 1) C 1 - C 2 | /146. RY*( 2) C 3         | 0.84     | 1.95      | 0.036  |  |  |
| 1. BD ( 1) C 1 - C 2 | /159. RY*( 2) C 4         | 2.16     | 1.83      | 0.056  |  |  |
| 1. BD ( 1) C 1 - C 2 | /288. RY*( 1) N 13        | 0.89     | 1.52      | 0.033  |  |  |
| 1. BD ( 1) C 1 - C 2 | /610. BD*( 1) C 1 - C 3   | 4.20     | 1.27      | 0.065  |  |  |
| 1. BD ( 1) C 1 - C 2 | /612. BD*( 1) C 1 - N 13  | 0.59     | 1.03      | 0.022  |  |  |
| 1. BD ( 1) C 1 - C 2 | /613. BD*( 1) C 2 - C 4   | 2.94     | 1.31      | 0.056  |  |  |
| 1. BD ( 1) C 1 - C 2 | /615. BD*( 1) C 2 - H 30  | 0.62     | 1.10      | 0.023  |  |  |
| 1. BD ( 1) C 1 - C 2 | /617. BD*( 1) C 3 - C 7   | 4.36     | 1.07      | 0.061  |  |  |
| 1. BD ( 1) C 1 - C 2 | /619. BD*( 1) C 4 - H 31  | 2.83     | 1.10      | 0.050  |  |  |
| 1. BD ( 1) C 1 - C 2 | /636. BD*( 1) N 13 - H 38 | 1.65     | 1.00      | 0.036  |  |  |
| 2. BD ( 1) C 1 - C 3 | /132. RY*( 1) C 2         | 0.73     | 2.02      | 0.035  |  |  |
| 2. BD ( 1) C 1 - C 3 | /171. RY*( 1) C 5         | 0.56     | 1.88      | 0.029  |  |  |
| 2. BD ( 1) C 1 - C 3 | /200. RY*( 4) C 7         | 0.59     | 2.77      | 0.036  |  |  |
| 2. BD ( 1) C 1 - C 3 | /288. RY*( 1) N 13        | 0.55     | 1.62      | 0.027  |  |  |
| 2. BD ( 1) C 1 - C 3 | /609. BD*( 1) C 1 - C 2   | 3.43     | 1.20      | 0.057  |  |  |
| 2. BD ( 1) C 1 - C 3 | /612. BD*( 1) C 1 - N 13  | 2.10     | 1.12      | 0.043  |  |  |
| 2. BD ( 1) C 1 - C 3 | /615. BD*( 1) C 2 - H 30  | 1.30     | 1.20      | 0.035  |  |  |
| 2. BD ( 1) C 1 - C 3 | /616. BD*( 1) C 3 - C 5   | 4.24     | 1.20      | 0.064  |  |  |
| 2. BD ( 1) C 1 - C 3 | /617. BD*( 1) C 3 - C 7   | 2.95     | 1.17      | 0.053  |  |  |
| 2. BD ( 1) C 1 - C 3 | /622. BD*( 1) C 5 - H 32  | 1.33     | 1.20      | 0.036  |  |  |

|                       |                           |                  |
|-----------------------|---------------------------|------------------|
| 2. BD ( 1) C 1 - C 3  | /625. BD*( 1) C 7 - O 9   | 1.16 1.26 0.034  |
| 2. BD ( 1) C 1 - C 3  | /635. BD*( 1) N 13 - C 14 | 2.09 1.12 0.044  |
| 3. BD ( 2) C 1 - C 3  | /134. RY*( 3) C 2         | 1.11 1.00 0.032  |
| 3. BD ( 2) C 1 - C 3  | /173. RY*( 3) C 5         | 0.87 0.88 0.026  |
| 3. BD ( 2) C 1 - C 3  | /201. RY*( 5) C 7         | 0.60 1.46 0.028  |
| 3. BD ( 2) C 1 - C 3  | /614. BD*( 2) C 2 - C 4   | 10.75 0.33 0.054 |
| 3. BD ( 2) C 1 - C 3  | /621. BD*( 2) C 5 - C 6   | 13.97 0.32 0.059 |
| 3. BD ( 2) C 1 - C 3  | /624. BD*( 1) C 7 - O 8   | 1.19 0.57 0.024  |
| 3. BD ( 2) C 1 - C 3  | /626. BD*( 2) C 7 - O 9   | 18.73 0.27 0.064 |
| 3. BD ( 2) C 1 - C 3  | /635. BD*( 1) N 13 - C 14 | 1.41 0.66 0.028  |
| 3. BD ( 2) C 1 - C 3  | /636. BD*( 1) N 13 - H 38 | 1.43 0.63 0.029  |
| 4. BD ( 1) C 1 - N 13 | /132. RY*( 1) C 2         | 0.52 2.06 0.029  |
| 4. BD ( 1) C 1 - N 13 | /145. RY*( 1) C 3         | 1.26 2.62 0.051  |
| 4. BD ( 1) C 1 - N 13 | /301. RY*( 1) C 14        | 1.81 1.57 0.048  |
| 4. BD ( 1) C 1 - N 13 | /609. BD*( 1) C 1 - C 2   | 0.64 1.23 0.025  |
| 4. BD ( 1) C 1 - N 13 | /610. BD*( 1) C 1 - C 3   | 2.19 1.41 0.050  |
| 4. BD ( 1) C 1 - N 13 | /613. BD*( 1) C 2 - C 4   | 0.87 1.44 0.032  |
| 4. BD ( 1) C 1 - N 13 | /616. BD*( 1) C 3 - C 5   | 2.73 1.23 0.052  |
| 4. BD ( 1) C 1 - N 13 | /635. BD*( 1) N 13 - C 14 | 0.95 1.16 0.030  |
| 4. BD ( 1) C 1 - N 13 | /637. BD*( 1) C 14 - C 15 | 1.75 1.19 0.041  |
| 5. BD ( 1) C 2 - C 4  | /119. RY*( 1) C 1         | 1.38 1.91 0.046  |
| 5. BD ( 1) C 2 - C 4  | /121. RY*( 3) C 1         | 0.95 2.03 0.040  |
| 5. BD ( 1) C 2 - C 4  | /184. RY*( 1) C 6         | 1.07 1.82 0.040  |
| 5. BD ( 1) C 2 - C 4  | /609. BD*( 1) C 1 - C 2   | 2.72 1.20 0.051  |
| 5. BD ( 1) C 2 - C 4  | /612. BD*( 1) C 1 - N 13  | 2.77 1.12 0.050  |
| 5. BD ( 1) C 2 - C 4  | /615. BD*( 1) C 2 - H 30  | 1.68 1.20 0.040  |
| 5. BD ( 1) C 2 - C 4  | /618. BD*( 1) C 4 - C 6   | 3.68 1.21 0.060  |
| 5. BD ( 1) C 2 - C 4  | /619. BD*( 1) C 4 - H 31  | 1.59 1.19 0.039  |
| 5. BD ( 1) C 2 - C 4  | /623. BD*( 1) C 6 - Se 11 | 3.18 0.88 0.047  |
| 6. BD ( 2) C 2 - C 4  | /124. RY*( 6) C 1         | 0.63 1.82 0.032  |
| 6. BD ( 2) C 2 - C 4  | /611. BD*( 2) C 1 - C 3   | 14.30 0.31 0.061 |
| 6. BD ( 2) C 2 - C 4  | /621. BD*( 2) C 5 - C 6   | 12.98 0.31 0.057 |
| 7. BD ( 1) C 2 - H 30 | /119. RY*( 1) C 1         | 0.58 1.68 0.028  |
| 7. BD ( 1) C 2 - H 30 | /120. RY*( 2) C 1         | 0.89 1.83 0.036  |
| 7. BD ( 1) C 2 - H 30 | /158. RY*( 1) C 4         | 1.43 1.68 0.044  |
| 7. BD ( 1) C 2 - H 30 | /610. BD*( 1) C 1 - C 3   | 3.22 1.14 0.054  |
| 7. BD ( 1) C 2 - H 30 | /612. BD*( 1) C 1 - N 13  | 0.60 0.89 0.021  |
| 7. BD ( 1) C 2 - H 30 | /613. BD*( 1) C 2 - C 4   | 1.59 1.18 0.039  |
| 7. BD ( 1) C 2 - H 30 | /618. BD*( 1) C 4 - C 6   | 5.70 0.98 0.067  |
| 7. BD ( 1) C 2 - H 30 | /619. BD*( 1) C 4 - H 31  | 0.94 0.96 0.027  |
| 8. BD ( 1) C 3 - C 5  | /120. RY*( 2) C 1         | 1.22 1.95 0.044  |
| 8. BD ( 1) C 3 - C 5  | /185. RY*( 2) C 6         | 1.46 1.48 0.042  |
| 8. BD ( 1) C 3 - C 5  | /197. RY*( 1) C 7         | 0.97 1.59 0.035  |
| 8. BD ( 1) C 3 - C 5  | /610. BD*( 1) C 1 - C 3   | 4.57 1.26 0.068  |
| 8. BD ( 1) C 3 - C 5  | /612. BD*( 1) C 1 - N 13  | 5.31 1.02 0.066  |
| 8. BD ( 1) C 3 - C 5  | /617. BD*( 1) C 3 - C 7   | 1.67 1.06 0.038  |
| 8. BD ( 1) C 3 - C 5  | /620. BD*( 1) C 5 - C 6   | 3.92 1.29 0.064  |
| 8. BD ( 1) C 3 - C 5  | /622. BD*( 1) C 5 - H 32  | 0.64 1.10 0.024  |
| 8. BD ( 1) C 3 - C 5  | /623. BD*( 1) C 6 - Se 11 | 5.63 0.77 0.059  |
| 8. BD ( 1) C 3 - C 5  | /624. BD*( 1) C 7 - O 8   | 2.78 0.93 0.046  |
| 8. BD ( 1) C 3 - C 5  | /626. BD*( 2) C 7 - O 9   | 0.59 0.63 0.018  |
| 9. BD ( 1) C 3 - C 7  | /119. RY*( 1) C 1         | 0.80 1.85 0.035  |
| 9. BD ( 1) C 3 - C 7  | /120. RY*( 2) C 1         | 1.07 2.00 0.041  |
| 9. BD ( 1) C 3 - C 7  | /171. RY*( 1) C 5         | 1.04 1.82 0.039  |
| 9. BD ( 1) C 3 - C 7  | /223. RY*( 1) O 9         | 0.73 1.81 0.033  |

|                         |                            |       |      |       |
|-------------------------|----------------------------|-------|------|-------|
| 9. BD ( 1) C 3 - C 7    | /609. BD*( 1) C 1 - C 2    | 3.79  | 1.13 | 0.058 |
| 9. BD ( 1) C 3 - C 7    | /610. BD*( 1) C 1 - C 3    | 4.01  | 1.30 | 0.065 |
| 9. BD ( 1) C 3 - C 7    | /616. BD*( 1) C 3 - C 5    | 1.29  | 1.13 | 0.034 |
| 9. BD ( 1) C 3 - C 7    | /620. BD*( 1) C 5 - C 6    | 1.47  | 1.33 | 0.040 |
| 9. BD ( 1) C 3 - C 7    | /625. BD*( 1) C 7 - O 9    | 0.95  | 1.19 | 0.030 |
| 9. BD ( 1) C 3 - C 7    | /627. BD*( 1) O 8 - C 10   | 2.85  | 0.96 | 0.047 |
| 10. BD ( 1) C 4 - C 6   | /132. RY*( 1) C 2          | 0.76  | 1.94 | 0.034 |
| 10. BD ( 1) C 4 - C 6   | /133. RY*( 2) C 2          | 1.55  | 2.01 | 0.050 |
| 10. BD ( 1) C 4 - C 6   | /171. RY*( 1) C 5          | 0.90  | 1.80 | 0.036 |
| 10. BD ( 1) C 4 - C 6   | /172. RY*( 2) C 5          | 0.89  | 1.63 | 0.034 |
| 10. BD ( 1) C 4 - C 6   | /613. BD*( 1) C 2 - C 4    | 3.21  | 1.33 | 0.058 |
| 10. BD ( 1) C 4 - C 6   | /615. BD*( 1) C 2 - H 30   | 2.66  | 1.12 | 0.049 |
| 10. BD ( 1) C 4 - C 6   | /619. BD*( 1) C 4 - H 31   | 0.87  | 1.11 | 0.028 |
| 10. BD ( 1) C 4 - C 6   | /620. BD*( 1) C 5 - C 6    | 3.55  | 1.32 | 0.061 |
| 10. BD ( 1) C 4 - C 6   | /622. BD*( 1) C 5 - H 32   | 3.39  | 1.12 | 0.055 |
| 11. BD ( 1) C 4 - H 31  | /132. RY*( 1) C 2          | 1.54  | 1.79 | 0.047 |
| 11. BD ( 1) C 4 - H 31  | /184. RY*( 1) C 6          | 1.12  | 1.60 | 0.038 |
| 11. BD ( 1) C 4 - H 31  | /609. BD*( 1) C 1 - C 2    | 5.65  | 0.97 | 0.066 |
| 11. BD ( 1) C 4 - H 31  | /613. BD*( 1) C 2 - C 4    | 1.52  | 1.18 | 0.038 |
| 11. BD ( 1) C 4 - H 31  | /615. BD*( 1) C 2 - H 30   | 0.95  | 0.97 | 0.027 |
| 11. BD ( 1) C 4 - H 31  | /620. BD*( 1) C 5 - C 6    | 3.20  | 1.17 | 0.055 |
| 12. BD ( 1) C 5 - C 6   | /145. RY*( 1) C 3          | 1.61  | 2.60 | 0.058 |
| 12. BD ( 1) C 5 - C 6   | /146. RY*( 2) C 3          | 0.57  | 2.06 | 0.031 |
| 12. BD ( 1) C 5 - C 6   | /158. RY*( 1) C 4          | 1.04  | 1.92 | 0.040 |
| 12. BD ( 1) C 5 - C 6   | /616. BD*( 1) C 3 - C 5    | 3.32  | 1.21 | 0.057 |
| 12. BD ( 1) C 5 - C 6   | /617. BD*( 1) C 3 - C 7    | 2.01  | 1.18 | 0.044 |
| 12. BD ( 1) C 5 - C 6   | /618. BD*( 1) C 4 - C 6    | 3.21  | 1.23 | 0.056 |
| 12. BD ( 1) C 5 - C 6   | /619. BD*( 1) C 4 - H 31   | 1.64  | 1.21 | 0.040 |
| 12. BD ( 1) C 5 - C 6   | /622. BD*( 1) C 5 - H 32   | 2.29  | 1.22 | 0.047 |
| 13. BD ( 2) C 5 - C 6   | /148. RY*( 4) C 3          | 0.69  | 1.08 | 0.026 |
| 13. BD ( 2) C 5 - C 6   | /160. RY*( 3) C 4          | 1.78  | 1.11 | 0.042 |
| 13. BD ( 2) C 5 - C 6   | /249. RY*( 1) Se 11        | 0.92  | 0.84 | 0.026 |
| 13. BD ( 2) C 5 - C 6   | /611. BD*( 2) C 1 - C 3    | 11.40 | 0.32 | 0.055 |
| 13. BD ( 2) C 5 - C 6   | /614. BD*( 2) C 2 - C 4    | 13.21 | 0.33 | 0.059 |
| 13. BD ( 2) C 5 - C 6   | /631. BD*( 1) Se 11 - C 12 | 0.54  | 0.38 | 0.014 |
| 14. BD ( 1) C 5 - H 32  | /145. RY*( 1) C 3          | 1.79  | 2.35 | 0.058 |
| 14. BD ( 1) C 5 - H 32  | /184. RY*( 1) C 6          | 1.78  | 1.59 | 0.048 |
| 14. BD ( 1) C 5 - H 32  | /610. BD*( 1) C 1 - C 3    | 3.07  | 1.14 | 0.053 |
| 14. BD ( 1) C 5 - H 32  | /618. BD*( 1) C 4 - C 6    | 6.04  | 0.98 | 0.069 |
| 14. BD ( 1) C 5 - H 32  | /620. BD*( 1) C 5 - C 6    | 2.13  | 1.17 | 0.045 |
| 15. BD ( 1) C 6 - Se 11 | /158. RY*( 1) C 4          | 2.06  | 1.74 | 0.054 |
| 15. BD ( 1) C 6 - Se 11 | /171. RY*( 1) C 5          | 1.67  | 1.72 | 0.048 |
| 15. BD ( 1) C 6 - Se 11 | /275. RY*( 1) C 12         | 0.60  | 1.35 | 0.026 |
| 15. BD ( 1) C 6 - Se 11 | /613. BD*( 1) C 2 - C 4    | 2.64  | 1.24 | 0.051 |
| 15. BD ( 1) C 6 - Se 11 | /616. BD*( 1) C 3 - C 5    | 5.19  | 1.03 | 0.065 |
| 15. BD ( 1) C 6 - Se 11 | /620. BD*( 1) C 5 - C 6    | 0.96  | 1.23 | 0.031 |
| 15. BD ( 1) C 6 - Se 11 | /622. BD*( 1) C 5 - H 32   | 0.91  | 1.04 | 0.028 |
| 15. BD ( 1) C 6 - Se 11 | /632. BD*( 1) C 12 - C 21  | 0.93  | 0.99 | 0.027 |
| 16. BD ( 1) C 7 - O 8   | /146. RY*( 2) C 3          | 1.07  | 2.17 | 0.043 |
| 16. BD ( 1) C 7 - O 8   | /238. RY*( 3) C 10         | 1.01  | 1.84 | 0.039 |
| 16. BD ( 1) C 7 - O 8   | /616. BD*( 1) C 3 - C 5    | 1.27  | 1.31 | 0.037 |
| 16. BD ( 1) C 7 - O 8   | /630. BD*( 1) C 10 - H 35  | 0.65  | 1.24 | 0.025 |
| 17. BD ( 1) C 7 - O 9   | /146. RY*( 2) C 3          | 1.18  | 2.30 | 0.046 |
| 17. BD ( 1) C 7 - O 9   | /197. RY*( 1) C 7          | 1.65  | 1.94 | 0.051 |
| 17. BD ( 1) C 7 - O 9   | /610. BD*( 1) C 1 - C 3    | 1.54  | 1.62 | 0.045 |

|                          |                           |                 |
|--------------------------|---------------------------|-----------------|
| 17. BD ( 1) C 7 - O 9    | /617. BD*( 1) C 3 - C 7   | 1.76 1.42 0.045 |
| 18. BD ( 2) C 7 - O 9    | /611. BD*( 2) C 1 - C 3   | 4.49 0.40 0.041 |
| 18. BD ( 2) C 7 - O 9    | /626. BD*( 2) C 7 - O 9   | 0.65 0.36 0.014 |
| 19. BD ( 1) O 8 - C 10   | /197. RY*( 1) C 7         | 1.27 1.78 0.042 |
| 19. BD ( 1) O 8 - C 10   | /617. BD*( 1) C 3 - C 7   | 2.61 1.26 0.052 |
| 20. BD ( 1) C 10 - H 33  | /211. RY*( 2) O 8         | 0.57 1.51 0.026 |
| 20. BD ( 1) C 10 - H 33  | /627. BD*( 1) O 8 - C 10  | 0.59 0.79 0.019 |
| 21. BD ( 1) C 10 - H 34  | /211. RY*( 2) O 8         | 0.53 1.51 0.025 |
| 22. BD ( 1) C 10 - H 35  | /624. BD*( 1) C 7 - O 8   | 3.94 0.80 0.051 |
| 23. BD ( 1) Se 11 - C 12 | /396. RY*( 5) C 21        | 0.64 2.07 0.033 |
| 23. BD ( 1) Se 11 - C 12 | /618. BD*( 1) C 4 - C 6   | 1.74 1.03 0.038 |
| 23. BD ( 1) Se 11 - C 12 | /621. BD*( 2) C 5 - C 6   | 0.93 0.59 0.022 |
| 23. BD ( 1) Se 11 - C 12 | /650. BD*( 1) C 21 - O 22 | 0.70 1.09 0.025 |
| 23. BD ( 1) Se 11 - C 12 | /651. BD*( 2) C 21 - O 22 | 6.60 0.58 0.059 |
| 24. BD ( 1) C 12 - C 21  | /405. RY*( 1) O 22        | 0.80 1.81 0.034 |
| 24. BD ( 1) C 12 - C 21  | /418. RY*( 1) N 23        | 1.89 1.70 0.051 |
| 24. BD ( 1) C 12 - C 21  | /633. BD*( 1) C 12 - H 36 | 0.59 1.06 0.022 |
| 24. BD ( 1) C 12 - C 21  | /650. BD*( 1) C 21 - O 22 | 0.80 1.21 0.028 |
| 24. BD ( 1) C 12 - C 21  | /653. BD*( 1) N 23 - C 24 | 2.90 1.08 0.050 |
| 25. BD ( 1) C 12 - H 36  | /395. RY*( 4) C 21        | 0.67 2.40 0.036 |
| 25. BD ( 1) C 12 - H 36  | /650. BD*( 1) C 21 - O 22 | 3.21 1.05 0.052 |
| 25. BD ( 1) C 12 - H 36  | /651. BD*( 2) C 21 - O 22 | 2.61 0.54 0.036 |
| 26. BD ( 1) C 12 - H 37  | /392. RY*( 1) C 21        | 0.55 1.29 0.024 |
| 26. BD ( 1) C 12 - H 37  | /632. BD*( 1) C 12 - C 21 | 0.54 0.92 0.020 |
| 26. BD ( 1) C 12 - H 37  | /650. BD*( 1) C 21 - O 22 | 1.04 1.04 0.029 |
| 26. BD ( 1) C 12 - H 37  | /652. BD*( 1) C 21 - N 23 | 5.67 0.89 0.065 |
| 27. BD ( 1) N 13 - C 14  | /119. RY*( 1) C 1         | 0.80 1.95 0.035 |
| 27. BD ( 1) N 13 - C 14  | /120. RY*( 2) C 1         | 0.83 2.10 0.037 |
| 27. BD ( 1) N 13 - C 14  | /314. RY*( 1) C 15        | 0.99 1.60 0.036 |
| 27. BD ( 1) N 13 - C 14  | /610. BD*( 1) C 1 - C 3   | 1.67 1.41 0.043 |
| 27. BD ( 1) N 13 - C 14  | /612. BD*( 1) C 1 - N 13  | 1.19 1.16 0.033 |
| 27. BD ( 1) N 13 - C 14  | /642. BD*( 1) C 15 - H 40 | 0.60 1.18 0.024 |
| 28. BD ( 1) N 13 - H 38  | /119. RY*( 1) C 1         | 1.10 1.82 0.040 |
| 28. BD ( 1) N 13 - H 38  | /302. RY*( 2) C 14        | 0.64 2.01 0.032 |
| 28. BD ( 1) N 13 - H 38  | /305. RY*( 5) C 14        | 1.16 2.54 0.049 |
| 28. BD ( 1) N 13 - H 38  | /609. BD*( 1) C 1 - C 2   | 2.15 1.10 0.044 |
| 28. BD ( 1) N 13 - H 38  | /611. BD*( 2) C 1 - C 3   | 1.48 0.68 0.031 |
| 28. BD ( 1) N 13 - H 38  | /638. BD*( 1) C 14 - O 16 | 2.97 1.18 0.053 |
| 29. BD ( 1) C 14 - C 15  | /289. RY*( 2) N 13        | 1.51 1.73 0.046 |
| 29. BD ( 1) C 14 - C 15  | /327. RY*( 1) O 16        | 0.89 1.79 0.036 |
| 29. BD ( 1) C 14 - C 15  | /340. RY*( 1) C 17        | 1.02 1.46 0.035 |
| 29. BD ( 1) C 14 - C 15  | /612. BD*( 1) C 1 - N 13  | 3.08 1.04 0.051 |
| 29. BD ( 1) C 14 - C 15  | /638. BD*( 1) C 14 - O 16 | 0.71 1.19 0.026 |
| 29. BD ( 1) C 14 - C 15  | /640. BD*( 1) C 15 - C 17 | 1.00 1.02 0.029 |
| 29. BD ( 1) C 14 - C 15  | /641. BD*( 1) C 15 - H 39 | 0.51 1.04 0.020 |
| 29. BD ( 1) C 14 - C 15  | /643. BD*( 1) C 17 - C 18 | 2.35 1.04 0.044 |
| 30. BD ( 1) C 14 - O 16  | /301. RY*( 1) C 14        | 1.74 1.78 0.050 |
| 30. BD ( 1) C 14 - O 16  | /636. BD*( 1) N 13 - H 38 | 1.22 1.34 0.036 |
| 30. BD ( 1) C 14 - O 16  | /637. BD*( 1) C 14 - C 15 | 1.28 1.40 0.038 |
| 31. BD ( 2) C 14 - O 16  | /639. BD*( 2) C 14 - O 16 | 0.60 0.36 0.014 |
| 31. BD ( 2) C 14 - O 16  | /640. BD*( 1) C 15 - C 17 | 1.89 0.71 0.033 |
| 31. BD ( 2) C 14 - O 16  | /641. BD*( 1) C 15 - H 39 | 1.75 0.73 0.032 |
| 32. BD ( 1) C 15 - C 17  | /303. RY*( 3) C 14        | 0.61 1.87 0.030 |
| 32. BD ( 1) C 15 - C 17  | /304. RY*( 4) C 14        | 0.84 2.22 0.039 |
| 32. BD ( 1) C 15 - C 17  | /353. RY*( 1) C 18        | 1.40 1.43 0.040 |

|                         |                            |      |      |       |
|-------------------------|----------------------------|------|------|-------|
| 32. BD ( 1) C 15 - C 17 | /637. BD*( 1) C 14 - C 15  | 0.55 | 1.03 | 0.021 |
| 32. BD ( 1) C 15 - C 17 | /638. BD*( 1) C 14 - O 16  | 1.28 | 1.16 | 0.035 |
| 32. BD ( 1) C 15 - C 17 | /639. BD*( 2) C 14 - O 16  | 2.67 | 0.63 | 0.039 |
| 32. BD ( 1) C 15 - C 17 | /643. BD*( 1) C 17 - C 18  | 0.89 | 1.00 | 0.027 |
| 32. BD ( 1) C 15 - C 17 | /645. BD*( 1) C 17 - H 42  | 0.52 | 0.99 | 0.020 |
| 32. BD ( 1) C 15 - C 17 | /646. BD*( 1) C 18 - O 19  | 3.99 | 0.92 | 0.055 |
| 33. BD ( 1) C 15 - H 39 | /342. RY*( 3) C 17         | 0.55 | 1.43 | 0.025 |
| 33. BD ( 1) C 15 - H 39 | /638. BD*( 1) C 14 - O 16  | 1.98 | 1.03 | 0.041 |
| 33. BD ( 1) C 15 - H 39 | /639. BD*( 2) C 14 - O 16  | 5.17 | 0.50 | 0.048 |
| 33. BD ( 1) C 15 - H 39 | /644. BD*( 1) C 17 - H 41  | 2.84 | 0.86 | 0.044 |
| 34. BD ( 1) C 15 - H 40 | /635. BD*( 1) N 13 - C 14  | 5.67 | 0.87 | 0.064 |
| 34. BD ( 1) C 15 - H 40 | /638. BD*( 1) C 14 - O 16  | 1.15 | 1.02 | 0.031 |
| 34. BD ( 1) C 15 - H 40 | /645. BD*( 1) C 17 - H 42  | 2.97 | 0.85 | 0.045 |
| 35. BD ( 1) C 17 - C 18 | /315. RY*( 2) C 15         | 0.70 | 1.41 | 0.028 |
| 35. BD ( 1) C 17 - C 18 | /379. RY*( 1) O 20         | 0.75 | 1.78 | 0.033 |
| 35. BD ( 1) C 17 - C 18 | /637. BD*( 1) C 14 - C 15  | 1.61 | 1.08 | 0.038 |
| 35. BD ( 1) C 17 - C 18 | /640. BD*( 1) C 15 - C 17  | 0.59 | 1.04 | 0.022 |
| 35. BD ( 1) C 17 - C 18 | /647. BD*( 1) C 18 - O 20  | 0.56 | 1.20 | 0.023 |
| 35. BD ( 1) C 17 - C 18 | /649. BD*( 1) O 19 - H 43  | 1.82 | 0.98 | 0.038 |
| 36. BD ( 1) C 17 - H 41 | /314. RY*( 1) C 15         | 0.89 | 1.33 | 0.031 |
| 36. BD ( 1) C 17 - H 41 | /641. BD*( 1) C 15 - H 39  | 2.85 | 0.89 | 0.045 |
| 36. BD ( 1) C 17 - H 41 | /647. BD*( 1) C 18 - O 20  | 1.83 | 1.03 | 0.039 |
| 36. BD ( 1) C 17 - H 41 | /648. BD*( 2) C 18 - O 20  | 5.19 | 0.50 | 0.047 |
| 37. BD ( 1) C 17 - H 42 | /315. RY*( 2) C 15         | 0.69 | 1.25 | 0.026 |
| 37. BD ( 1) C 17 - H 42 | /357. RY*( 5) C 18         | 0.57 | 1.55 | 0.027 |
| 37. BD ( 1) C 17 - H 42 | /642. BD*( 1) C 15 - H 40  | 2.58 | 0.91 | 0.043 |
| 37. BD ( 1) C 17 - H 42 | /647. BD*( 1) C 18 - O 20  | 1.77 | 1.03 | 0.038 |
| 37. BD ( 1) C 17 - H 42 | /648. BD*( 2) C 18 - O 20  | 5.22 | 0.50 | 0.048 |
| 38. BD ( 1) C 18 - O 19 | /341. RY*( 2) C 17         | 0.56 | 1.63 | 0.027 |
| 38. BD ( 1) C 18 - O 19 | /640. BD*( 1) C 15 - C 17  | 0.93 | 1.27 | 0.031 |
| 39. BD ( 1) C 18 - O 20 | /353. RY*( 1) C 18         | 1.55 | 1.81 | 0.047 |
| 39. BD ( 1) C 18 - O 20 | /643. BD*( 1) C 17 - C 18  | 1.13 | 1.38 | 0.036 |
| 40. BD ( 2) C 18 - O 20 | /644. BD*( 1) C 17 - H 41  | 1.79 | 0.74 | 0.032 |
| 40. BD ( 2) C 18 - O 20 | /645. BD*( 1) C 17 - H 42  | 1.83 | 0.73 | 0.033 |
| 40. BD ( 2) C 18 - O 20 | /648. BD*( 2) C 18 - O 20  | 0.71 | 0.36 | 0.015 |
| 41. BD ( 1) O 19 - H 43 | /353. RY*( 1) C 18         | 1.12 | 1.53 | 0.037 |
| 41. BD ( 1) O 19 - H 43 | /354. RY*( 2) C 18         | 0.92 | 1.97 | 0.038 |
| 41. BD ( 1) O 19 - H 43 | /359. RY*( 7) C 18         | 0.61 | 2.47 | 0.035 |
| 41. BD ( 1) O 19 - H 43 | /643. BD*( 1) C 17 - C 18  | 3.77 | 1.10 | 0.058 |
| 41. BD ( 1) O 19 - H 43 | /647. BD*( 1) C 18 - O 20  | 1.29 | 1.24 | 0.036 |
| 42. BD ( 1) C 21 - O 22 | /392. RY*( 1) C 21         | 1.60 | 1.75 | 0.047 |
| 42. BD ( 1) C 21 - O 22 | /632. BD*( 1) C 12 - C 21  | 1.44 | 1.38 | 0.040 |
| 42. BD ( 1) C 21 - O 22 | /633. BD*( 1) C 12 - H 36  | 0.55 | 1.35 | 0.024 |
| 42. BD ( 1) C 21 - O 22 | /654. BD*( 1) N 23 - H 44  | 1.00 | 1.34 | 0.033 |
| 43. BD ( 2) C 21 - O 22 | /631. BD*( 1) Se 11 - C 12 | 3.07 | 0.46 | 0.034 |
| 43. BD ( 2) C 21 - O 22 | /633. BD*( 1) C 12 - H 36  | 1.41 | 0.74 | 0.029 |
| 43. BD ( 2) C 21 - O 22 | /651. BD*( 2) C 21 - O 22  | 0.74 | 0.38 | 0.016 |
| 44. BD ( 1) C 21 - N 23 | /275. RY*( 1) C 12         | 0.80 | 1.54 | 0.031 |
| 44. BD ( 1) C 21 - N 23 | /431. RY*( 1) C 24         | 0.94 | 2.04 | 0.039 |
| 44. BD ( 1) C 21 - N 23 | /432. RY*( 2) C 24         | 0.74 | 2.18 | 0.036 |
| 44. BD ( 1) C 21 - N 23 | /634. BD*( 1) C 12 - H 37  | 0.64 | 1.17 | 0.024 |
| 44. BD ( 1) C 21 - N 23 | /653. BD*( 1) N 23 - C 24  | 1.07 | 1.17 | 0.032 |
| 44. BD ( 1) C 21 - N 23 | /655. BD*( 1) C 24 - C 25  | 1.67 | 1.25 | 0.041 |
| 45. BD ( 1) N 23 - C 24 | /392. RY*( 1) C 21         | 1.66 | 1.54 | 0.045 |
| 45. BD ( 1) N 23 - C 24 | /444. RY*( 1) C 25         | 0.81 | 2.06 | 0.037 |

|                         |                           |                  |
|-------------------------|---------------------------|------------------|
| 45. BD ( 1) N 23 - C 24 | /457. RY*( 1) C 26        | 0.64 2.04 0.032  |
| 45. BD ( 1) N 23 - C 24 | /632. BD*( 1) C 12 - C 21 | 1.81 1.17 0.041  |
| 45. BD ( 1) N 23 - C 24 | /652. BD*( 1) C 21 - N 23 | 0.91 1.15 0.029  |
| 45. BD ( 1) N 23 - C 24 | /655. BD*( 1) C 24 - C 25 | 0.61 1.24 0.025  |
| 45. BD ( 1) N 23 - C 24 | /656. BD*( 1) C 24 - C 26 | 2.05 1.43 0.048  |
| 45. BD ( 1) N 23 - C 24 | /658. BD*( 1) C 25 - C 27 | 0.83 1.44 0.031  |
| 45. BD ( 1) N 23 - C 24 | /661. BD*( 1) C 26 - C 28 | 2.10 1.26 0.046  |
| 46. BD ( 1) N 23 - H 44 | /393. RY*( 2) C 21        | 0.70 1.90 0.033  |
| 46. BD ( 1) N 23 - H 44 | /395. RY*( 4) C 21        | 0.93 2.51 0.043  |
| 46. BD ( 1) N 23 - H 44 | /431. RY*( 1) C 24        | 1.37 1.89 0.046  |
| 46. BD ( 1) N 23 - H 44 | /650. BD*( 1) C 21 - O 22 | 2.71 1.16 0.050  |
| 46. BD ( 1) N 23 - H 44 | /651. BD*( 2) C 21 - O 22 | 0.84 0.65 0.022  |
| 46. BD ( 1) N 23 - H 44 | /656. BD*( 1) C 24 - C 26 | 2.66 1.29 0.052  |
| 46. BD ( 1) N 23 - H 44 | /657. BD*( 2) C 24 - C 26 | 0.69 0.69 0.021  |
| 47. BD ( 1) C 24 - C 25 | /419. RY*( 2) N 23        | 1.01 1.53 0.035  |
| 47. BD ( 1) C 24 - C 25 | /457. RY*( 1) C 26        | 0.76 1.90 0.034  |
| 47. BD ( 1) C 24 - C 25 | /458. RY*( 2) C 26        | 0.58 1.90 0.030  |
| 47. BD ( 1) C 24 - C 25 | /470. RY*( 1) C 27        | 0.81 1.95 0.036  |
| 47. BD ( 1) C 24 - C 25 | /471. RY*( 2) C 27        | 1.68 2.11 0.053  |
| 47. BD ( 1) C 24 - C 25 | /652. BD*( 1) C 21 - N 23 | 2.63 1.01 0.047  |
| 47. BD ( 1) C 24 - C 25 | /653. BD*( 1) N 23 - C 24 | 0.54 1.03 0.021  |
| 47. BD ( 1) C 24 - C 25 | /656. BD*( 1) C 24 - C 26 | 4.08 1.29 0.065  |
| 47. BD ( 1) C 24 - C 25 | /658. BD*( 1) C 25 - C 27 | 2.97 1.30 0.056  |
| 47. BD ( 1) C 24 - C 25 | /660. BD*( 1) C 25 - H 45 | 0.61 1.09 0.023  |
| 47. BD ( 1) C 24 - C 25 | /662. BD*( 1) C 26 - H 46 | 3.04 1.11 0.052  |
| 47. BD ( 1) C 24 - C 25 | /664. BD*( 1) C 27 - H 47 | 2.90 1.10 0.051  |
| 48. BD ( 1) C 24 - C 26 | /419. RY*( 2) N 23        | 0.70 1.62 0.030  |
| 48. BD ( 1) C 24 - C 26 | /444. RY*( 1) C 25        | 0.77 2.02 0.035  |
| 48. BD ( 1) C 24 - C 26 | /483. RY*( 1) C 28        | 0.84 2.03 0.037  |
| 48. BD ( 1) C 24 - C 26 | /484. RY*( 2) C 28        | 1.05 2.18 0.043  |
| 48. BD ( 1) C 24 - C 26 | /653. BD*( 1) N 23 - C 24 | 2.02 1.12 0.043  |
| 48. BD ( 1) C 24 - C 26 | /654. BD*( 1) N 23 - H 44 | 1.69 1.08 0.038  |
| 48. BD ( 1) C 24 - C 26 | /655. BD*( 1) C 24 - C 25 | 3.82 1.19 0.060  |
| 48. BD ( 1) C 24 - C 26 | /660. BD*( 1) C 25 - H 45 | 1.49 1.18 0.037  |
| 48. BD ( 1) C 24 - C 26 | /661. BD*( 1) C 26 - C 28 | 2.66 1.21 0.051  |
| 48. BD ( 1) C 24 - C 26 | /662. BD*( 1) C 26 - H 46 | 1.80 1.20 0.042  |
| 48. BD ( 1) C 24 - C 26 | /667. BD*( 1) C 28 - H 48 | 1.35 1.19 0.036  |
| 49. BD ( 2) C 24 - C 26 | /446. RY*( 3) C 25        | 1.40 1.07 0.037  |
| 49. BD ( 2) C 24 - C 26 | /486. RY*( 4) C 28        | 1.10 0.90 0.030  |
| 49. BD ( 2) C 24 - C 26 | /652. BD*( 1) C 21 - N 23 | 0.85 0.63 0.022  |
| 49. BD ( 2) C 24 - C 26 | /654. BD*( 1) N 23 - H 44 | 0.89 0.61 0.022  |
| 49. BD ( 2) C 24 - C 26 | /659. BD*( 2) C 25 - C 27 | 13.10 0.31 0.057 |
| 49. BD ( 2) C 24 - C 26 | /666. BD*( 2) C 28 - C 29 | 13.52 0.32 0.059 |
| 50. BD ( 1) C 25 - C 27 | /432. RY*( 2) C 24        | 1.93 2.13 0.057  |
| 50. BD ( 1) C 25 - C 27 | /496. RY*( 1) C 29        | 0.92 2.04 0.039  |
| 50. BD ( 1) C 25 - C 27 | /497. RY*( 2) C 29        | 0.95 2.18 0.041  |
| 50. BD ( 1) C 25 - C 27 | /653. BD*( 1) N 23 - C 24 | 3.00 1.12 0.052  |
| 50. BD ( 1) C 25 - C 27 | /655. BD*( 1) C 24 - C 25 | 2.90 1.20 0.053  |
| 50. BD ( 1) C 25 - C 27 | /660. BD*( 1) C 25 - H 45 | 1.74 1.18 0.040  |
| 50. BD ( 1) C 25 - C 27 | /663. BD*( 1) C 27 - C 29 | 2.54 1.22 0.050  |
| 50. BD ( 1) C 25 - C 27 | /664. BD*( 1) C 27 - H 47 | 1.53 1.19 0.038  |
| 50. BD ( 1) C 25 - C 27 | /668. BD*( 1) C 29 - H 49 | 1.57 1.19 0.039  |
| 51. BD ( 2) C 25 - C 27 | /435. RY*( 5) C 24        | 0.56 1.82 0.030  |
| 51. BD ( 2) C 25 - C 27 | /498. RY*( 3) C 29        | 1.38 0.90 0.033  |
| 51. BD ( 2) C 25 - C 27 | /657. BD*( 2) C 24 - C 26 | 13.35 0.32 0.059 |

|                         |                           |                  |
|-------------------------|---------------------------|------------------|
| 51. BD ( 2) C 25 - C 27 | /666. BD*( 2) C 28 - C 29 | 12.36 0.32 0.056 |
| 52. BD ( 1) C 25 - H 45 | /431. RY*( 1) C 24        | 0.88 1.77 0.035  |
| 52. BD ( 1) C 25 - H 45 | /432. RY*( 2) C 24        | 0.78 1.92 0.035  |
| 52. BD ( 1) C 25 - H 45 | /470. RY*( 1) C 27        | 1.62 1.83 0.049  |
| 52. BD ( 1) C 25 - H 45 | /653. BD*( 1) N 23 - C 24 | 0.59 0.91 0.021  |
| 52. BD ( 1) C 25 - H 45 | /656. BD*( 1) C 24 - C 26 | 3.00 1.16 0.053  |
| 52. BD ( 1) C 25 - H 45 | /658. BD*( 1) C 25 - C 27 | 1.51 1.18 0.038  |
| 52. BD ( 1) C 25 - H 45 | /663. BD*( 1) C 27 - C 29 | 5.11 1.00 0.064  |
| 52. BD ( 1) C 25 - H 45 | /664. BD*( 1) C 27 - H 47 | 0.83 0.97 0.025  |
| 53. BD ( 1) C 26 - C 28 | /431. RY*( 1) C 24        | 1.91 1.88 0.054  |
| 53. BD ( 1) C 26 - C 28 | /496. RY*( 1) C 29        | 0.70 1.93 0.033  |
| 53. BD ( 1) C 26 - C 28 | /497. RY*( 2) C 29        | 1.59 2.07 0.052  |
| 53. BD ( 1) C 26 - C 28 | /653. BD*( 1) N 23 - C 24 | 5.67 1.02 0.068  |
| 53. BD ( 1) C 26 - C 28 | /656. BD*( 1) C 24 - C 26 | 3.18 1.28 0.057  |
| 53. BD ( 1) C 26 - C 28 | /662. BD*( 1) C 26 - H 46 | 0.59 1.10 0.023  |
| 53. BD ( 1) C 26 - C 28 | /665. BD*( 1) C 28 - C 29 | 2.78 1.30 0.054  |
| 53. BD ( 1) C 26 - C 28 | /668. BD*( 1) C 29 - H 49 | 3.30 1.09 0.054  |
| 54. BD ( 1) C 26 - H 46 | /432. RY*( 2) C 24        | 1.98 1.90 0.055  |
| 54. BD ( 1) C 26 - H 46 | /483. RY*( 1) C 28        | 1.19 1.80 0.042  |
| 54. BD ( 1) C 26 - H 46 | /653. BD*( 1) N 23 - C 24 | 0.97 0.89 0.026  |
| 54. BD ( 1) C 26 - H 46 | /655. BD*( 1) C 24 - C 25 | 5.74 0.97 0.067  |
| 54. BD ( 1) C 26 - H 46 | /656. BD*( 1) C 24 - C 26 | 1.51 1.15 0.037  |
| 54. BD ( 1) C 26 - H 46 | /665. BD*( 1) C 28 - C 29 | 2.54 1.17 0.049  |
| 55. BD ( 1) C 27 - C 29 | /444. RY*( 1) C 25        | 0.59 1.92 0.030  |
| 55. BD ( 1) C 27 - C 29 | /445. RY*( 2) C 25        | 1.80 1.98 0.054  |
| 55. BD ( 1) C 27 - C 29 | /483. RY*( 1) C 28        | 0.76 1.94 0.034  |
| 55. BD ( 1) C 27 - C 29 | /484. RY*( 2) C 28        | 1.59 2.08 0.052  |
| 55. BD ( 1) C 27 - C 29 | /658. BD*( 1) C 25 - C 27 | 2.80 1.29 0.054  |
| 55. BD ( 1) C 27 - C 29 | /660. BD*( 1) C 25 - H 45 | 3.35 1.08 0.054  |
| 55. BD ( 1) C 27 - C 29 | /664. BD*( 1) C 27 - H 47 | 0.55 1.09 0.022  |
| 55. BD ( 1) C 27 - C 29 | /665. BD*( 1) C 28 - C 29 | 2.82 1.30 0.054  |
| 55. BD ( 1) C 27 - C 29 | /667. BD*( 1) C 28 - H 48 | 3.23 1.09 0.053  |
| 55. BD ( 1) C 27 - C 29 | /668. BD*( 1) C 29 - H 49 | 0.53 1.09 0.022  |
| 56. BD ( 1) C 27 - H 47 | /444. RY*( 1) C 25        | 1.63 1.80 0.049  |
| 56. BD ( 1) C 27 - H 47 | /496. RY*( 1) C 29        | 1.30 1.82 0.044  |
| 56. BD ( 1) C 27 - H 47 | /655. BD*( 1) C 24 - C 25 | 5.60 0.98 0.066  |
| 56. BD ( 1) C 27 - H 47 | /658. BD*( 1) C 25 - C 27 | 1.33 1.17 0.035  |
| 56. BD ( 1) C 27 - H 47 | /660. BD*( 1) C 25 - H 45 | 0.87 0.96 0.026  |
| 56. BD ( 1) C 27 - H 47 | /665. BD*( 1) C 28 - C 29 | 2.50 1.18 0.049  |
| 57. BD ( 1) C 28 - C 29 | /457. RY*( 1) C 26        | 0.95 1.99 0.039  |
| 57. BD ( 1) C 28 - C 29 | /458. RY*( 2) C 26        | 1.02 1.99 0.040  |
| 57. BD ( 1) C 28 - C 29 | /470. RY*( 1) C 27        | 0.88 2.04 0.038  |
| 57. BD ( 1) C 28 - C 29 | /471. RY*( 2) C 27        | 1.01 2.20 0.042  |
| 57. BD ( 1) C 28 - C 29 | /604. RY*( 1) H 49        | 0.51 1.20 0.022  |
| 57. BD ( 1) C 28 - C 29 | /661. BD*( 1) C 26 - C 28 | 2.41 1.21 0.048  |
| 57. BD ( 1) C 28 - C 29 | /662. BD*( 1) C 26 - H 46 | 1.44 1.20 0.037  |
| 57. BD ( 1) C 28 - C 29 | /663. BD*( 1) C 27 - C 29 | 2.54 1.21 0.050  |
| 57. BD ( 1) C 28 - C 29 | /664. BD*( 1) C 27 - H 47 | 1.60 1.19 0.039  |
| 57. BD ( 1) C 28 - C 29 | /667. BD*( 1) C 28 - H 48 | 1.60 1.19 0.039  |
| 57. BD ( 1) C 28 - C 29 | /668. BD*( 1) C 29 - H 49 | 1.67 1.19 0.040  |
| 58. BD ( 2) C 28 - C 29 | /459. RY*( 3) C 26        | 0.92 0.98 0.028  |
| 58. BD ( 2) C 28 - C 29 | /472. RY*( 3) C 27        | 1.38 1.09 0.037  |
| 58. BD ( 2) C 28 - C 29 | /657. BD*( 2) C 24 - C 26 | 12.99 0.31 0.057 |
| 58. BD ( 2) C 28 - C 29 | /659. BD*( 2) C 25 - C 27 | 14.18 0.31 0.059 |
| 59. BD ( 1) C 28 - H 48 | /457. RY*( 1) C 26        | 1.28 1.77 0.043  |

|                         |                           |      |       |       |
|-------------------------|---------------------------|------|-------|-------|
| 59. BD ( 1) C 28 - H 48 | /496. RY*( 1) C 29        | 1.66 | 1.82  | 0.049 |
| 59. BD ( 1) C 28 - H 48 | /656. BD*( 1) C 24 - C 26 | 2.72 | 1.16  | 0.050 |
| 59. BD ( 1) C 28 - H 48 | /663. BD*( 1) C 27 - C 29 | 5.31 | 0.99  | 0.065 |
| 59. BD ( 1) C 28 - H 48 | /665. BD*( 1) C 28 - C 29 | 1.31 | 1.18  | 0.035 |
| 59. BD ( 1) C 28 - H 48 | /668. BD*( 1) C 29 - H 49 | 0.85 | 0.97  | 0.026 |
| 60. BD ( 1) C 29 - H 49 | /470. RY*( 1) C 27        | 1.31 | 1.82  | 0.044 |
| 60. BD ( 1) C 29 - H 49 | /483. RY*( 1) C 28        | 1.70 | 1.81  | 0.050 |
| 60. BD ( 1) C 29 - H 49 | /658. BD*( 1) C 25 - C 27 | 2.57 | 1.17  | 0.049 |
| 60. BD ( 1) C 29 - H 49 | /661. BD*( 1) C 26 - C 28 | 5.28 | 0.99  | 0.065 |
| 60. BD ( 1) C 29 - H 49 | /665. BD*( 1) C 28 - C 29 | 1.34 | 1.18  | 0.036 |
| 60. BD ( 1) C 29 - H 49 | /667. BD*( 1) C 28 - H 48 | 0.84 | 0.97  | 0.026 |
| 61. CR ( 1) C 1         | /133. RY*( 2) C 2         | 0.95 | 11.45 | 0.093 |
| 61. CR ( 1) C 1         | /145. RY*( 1) C 3         | 0.67 | 11.95 | 0.080 |
| 61. CR ( 1) C 1         | /146. RY*( 2) C 3         | 1.48 | 11.41 | 0.116 |
| 61. CR ( 1) C 1         | /147. RY*( 3) C 3         | 0.51 | 11.04 | 0.067 |
| 61. CR ( 1) C 1         | /610. BD*( 1) C 1 - C 3   | 1.35 | 10.73 | 0.108 |
| 61. CR ( 1) C 1         | /613. BD*( 1) C 2 - C 4   | 0.57 | 10.77 | 0.070 |
| 61. CR ( 1) C 1         | /616. BD*( 1) C 3 - C 5   | 1.03 | 10.56 | 0.094 |
| 61. CR ( 1) C 1         | /617. BD*( 1) C 3 - C 7   | 1.11 | 10.53 | 0.098 |
| 61. CR ( 1) C 1         | /635. BD*( 1) N 13 - C 14 | 1.03 | 10.48 | 0.095 |
| 62. CR ( 1) C 2         | /120. RY*( 2) C 1         | 1.36 | 11.36 | 0.111 |
| 62. CR ( 1) C 2         | /158. RY*( 1) C 4         | 0.60 | 11.21 | 0.074 |
| 62. CR ( 1) C 2         | /159. RY*( 2) C 4         | 1.71 | 11.22 | 0.124 |
| 62. CR ( 1) C 2         | /610. BD*( 1) C 1 - C 3   | 0.83 | 10.67 | 0.084 |
| 62. CR ( 1) C 2         | /612. BD*( 1) C 1 - N 13  | 0.54 | 10.42 | 0.067 |
| 62. CR ( 1) C 2         | /613. BD*( 1) C 2 - C 4   | 0.83 | 10.70 | 0.084 |
| 62. CR ( 1) C 2         | /618. BD*( 1) C 4 - C 6   | 1.31 | 10.51 | 0.106 |
| 63. CR ( 1) C 3         | /119. RY*( 1) C 1         | 1.12 | 11.23 | 0.100 |
| 63. CR ( 1) C 3         | /121. RY*( 3) C 1         | 1.05 | 11.36 | 0.097 |
| 63. CR ( 1) C 3         | /172. RY*( 2) C 5         | 0.70 | 11.03 | 0.079 |
| 63. CR ( 1) C 3         | /198. RY*( 2) C 7         | 0.60 | 11.51 | 0.074 |
| 63. CR ( 1) C 3         | /203. RY*( 7) C 7         | 0.83 | 11.19 | 0.086 |
| 63. CR ( 1) C 3         | /609. BD*( 1) C 1 - C 2   | 1.09 | 10.52 | 0.096 |
| 63. CR ( 1) C 3         | /610. BD*( 1) C 1 - C 3   | 1.24 | 10.69 | 0.104 |
| 63. CR ( 1) C 3         | /612. BD*( 1) C 1 - N 13  | 1.02 | 10.45 | 0.093 |
| 63. CR ( 1) C 3         | /620. BD*( 1) C 5 - C 6   | 0.72 | 10.72 | 0.079 |
| 63. CR ( 1) C 3         | /624. BD*( 1) C 7 - O 8   | 0.61 | 10.35 | 0.073 |
| 64. CR ( 1) C 4         | /133. RY*( 2) C 2         | 1.29 | 11.38 | 0.108 |
| 64. CR ( 1) C 4         | /135. RY*( 4) C 2         | 0.74 | 11.07 | 0.081 |
| 64. CR ( 1) C 4         | /185. RY*( 2) C 6         | 1.29 | 10.88 | 0.106 |
| 64. CR ( 1) C 4         | /187. RY*( 4) C 6         | 0.62 | 11.14 | 0.074 |
| 64. CR ( 1) C 4         | /609. BD*( 1) C 1 - C 2   | 1.20 | 10.49 | 0.101 |
| 64. CR ( 1) C 4         | /613. BD*( 1) C 2 - C 4   | 0.68 | 10.70 | 0.076 |
| 64. CR ( 1) C 4         | /620. BD*( 1) C 5 - C 6   | 0.83 | 10.69 | 0.084 |
| 64. CR ( 1) C 4         | /623. BD*( 1) C 6 -Se 11  | 0.83 | 10.18 | 0.083 |
| 65. CR ( 1) C 5         | /146. RY*( 2) C 3         | 0.86 | 11.35 | 0.088 |
| 65. CR ( 1) C 5         | /184. RY*( 1) C 6         | 1.12 | 11.12 | 0.100 |
| 65. CR ( 1) C 5         | /185. RY*( 2) C 6         | 1.88 | 10.88 | 0.128 |
| 65. CR ( 1) C 5         | /186. RY*( 3) C 6         | 0.52 | 10.91 | 0.067 |
| 65. CR ( 1) C 5         | /610. BD*( 1) C 1 - C 3   | 0.76 | 10.67 | 0.081 |
| 65. CR ( 1) C 5         | /617. BD*( 1) C 3 - C 7   | 0.65 | 10.47 | 0.075 |
| 65. CR ( 1) C 5         | /618. BD*( 1) C 4 - C 6   | 1.23 | 10.51 | 0.102 |
| 65. CR ( 1) C 5         | /620. BD*( 1) C 5 - C 6   | 1.21 | 10.69 | 0.102 |
| 65. CR ( 1) C 5         | /623. BD*( 1) C 6 -Se 11  | 1.28 | 10.18 | 0.103 |
| 66. CR ( 1) C 6         | /159. RY*( 2) C 4         | 1.03 | 11.26 | 0.096 |

|                   |                            |                  |
|-------------------|----------------------------|------------------|
| 66. CR ( 1) C 6   | /161. RY*( 4) C 4          | 0.50 11.05 0.067 |
| 66. CR ( 1) C 6   | /172. RY*( 2) C 5          | 2.10 11.04 0.136 |
| 66. CR ( 1) C 6   | /174. RY*( 4) C 5          | 0.53 11.20 0.069 |
| 66. CR ( 1) C 6   | /613. BD*( 1) C 2 - C 4    | 0.62 10.74 0.073 |
| 66. CR ( 1) C 6   | /616. BD*( 1) C 3 - C 5    | 1.16 10.53 0.099 |
| 66. CR ( 1) C 6   | /620. BD*( 1) C 5 - C 6    | 1.22 10.73 0.103 |
| 66. CR ( 1) C 6   | /622. BD*( 1) C 5 - H 32   | 0.55 10.54 0.068 |
| 66. CR ( 1) C 6   | /623. BD*( 1) C 6 -Se 11   | 1.33 10.22 0.105 |
| 67. CR ( 1) C 7   | /145. RY*( 1) C 3          | 1.19 12.04 0.107 |
| 67. CR ( 1) C 7   | /610. BD*( 1) C 1 - C 3    | 0.87 10.83 0.087 |
| 67. CR ( 1) C 7   | /616. BD*( 1) C 3 - C 5    | 0.54 10.65 0.068 |
| 67. CR ( 1) C 7   | /617. BD*( 1) C 3 - C 7    | 0.55 10.63 0.069 |
| 67. CR ( 1) C 7   | /624. BD*( 1) C 7 - O 8    | 0.67 10.49 0.077 |
| 67. CR ( 1) C 7   | /627. BD*( 1) O 8 - C 10   | 1.11 10.48 0.096 |
| 68. CR ( 1) O 8   | /197. RY*( 1) C 7          | 1.01 19.93 0.127 |
| 68. CR ( 1) O 8   | /198. RY*( 2) C 7          | 1.10 20.42 0.134 |
| 68. CR ( 1) O 8   | /238. RY*( 3) C 10         | 0.86 19.96 0.117 |
| 69. CR ( 1) O 9   | /197. RY*( 1) C 7          | 5.26 19.81 0.289 |
| 69. CR ( 1) O 9   | /617. BD*( 1) C 3 - C 7    | 0.79 19.29 0.111 |
| 70. CR ( 1) C 10  | /535. RY*( 2) H 35         | 0.54 12.16 0.072 |
| 70. CR ( 1) C 10  | /624. BD*( 1) C 7 - O 8    | 1.11 10.40 0.098 |
| 70. CR ( 1) C 10  | /627. BD*( 1) O 8 - C 10   | 1.49 10.39 0.111 |
| 73. CR ( 3) Se 11 | /184. RY*( 1) C 6          | 0.96 11.37 0.093 |
| 73. CR ( 3) Se 11 | /618. BD*( 1) C 4 - C 6    | 0.75 10.76 0.081 |
| 73. CR ( 3) Se 11 | /620. BD*( 1) C 5 - C 6    | 1.22 10.94 0.104 |
| 85. CR ( 1) C 12  | /393. RY*( 2) C 21         | 1.09 11.36 0.100 |
| 85. CR ( 1) C 12  | /631. BD*( 1) Se 11 - C 12 | 1.05 10.19 0.093 |
| 85. CR ( 1) C 12  | /652. BD*( 1) C 21 - N 23  | 0.60 10.47 0.073 |
| 86. CR ( 1) N 13  | /119. RY*( 1) C 1          | 1.08 15.37 0.115 |
| 86. CR ( 1) N 13  | /120. RY*( 2) C 1          | 0.58 15.52 0.085 |
| 86. CR ( 1) N 13  | /302. RY*( 2) C 14         | 1.75 15.56 0.148 |
| 86. CR ( 1) N 13  | /610. BD*( 1) C 1 - C 3    | 0.59 14.83 0.084 |
| 87. CR ( 1) C 14  | /316. RY*( 3) C 15         | 0.52 11.40 0.069 |
| 87. CR ( 1) C 14  | /612. BD*( 1) C 1 - N 13   | 1.18 10.55 0.100 |
| 88. CR ( 1) C 15  | /302. RY*( 2) C 14         | 0.85 11.42 0.088 |
| 88. CR ( 1) C 15  | /305. RY*( 5) C 14         | 0.53 11.95 0.071 |
| 88. CR ( 1) C 15  | /635. BD*( 1) N 13 - C 14  | 0.59 10.44 0.071 |
| 89. CR ( 1) O 16  | /301. RY*( 1) C 14         | 5.93 19.63 0.306 |
| 89. CR ( 1) O 16  | /637. BD*( 1) C 14 - C 15  | 0.76 19.25 0.109 |
| 90. CR ( 1) C 17  | /317. RY*( 4) C 15         | 0.72 11.15 0.080 |
| 90. CR ( 1) C 17  | /354. RY*( 2) C 18         | 0.78 11.33 0.084 |
| 91. CR ( 1) C 18  | /340. RY*( 1) C 17         | 0.66 11.01 0.076 |
| 91. CR ( 1) C 18  | /343. RY*( 4) C 17         | 0.54 11.34 0.070 |
| 91. CR ( 1) C 18  | /646. BD*( 1) C 18 - O 19  | 0.66 10.51 0.076 |
| 92. CR ( 1) O 19  | /353. RY*( 1) C 18         | 0.74 19.78 0.108 |
| 92. CR ( 1) O 19  | /354. RY*( 2) C 18         | 1.77 20.23 0.169 |
| 92. CR ( 1) O 19  | /356. RY*( 4) C 18         | 0.71 21.10 0.110 |
| 92. CR ( 1) O 19  | /577. RY*( 4) H 43         | 0.55 20.96 0.096 |
| 93. CR ( 1) O 20  | /353. RY*( 1) C 18         | 5.96 19.67 0.307 |
| 93. CR ( 1) O 20  | /643. BD*( 1) C 17 - C 18  | 0.74 19.25 0.108 |
| 94. CR ( 1) C 21  | /277. RY*( 3) C 12         | 1.09 10.99 0.098 |
| 94. CR ( 1) C 21  | /653. BD*( 1) N 23 - C 24  | 1.15 10.57 0.099 |
| 95. CR ( 1) O 22  | /392. RY*( 1) C 21         | 5.95 19.61 0.306 |
| 95. CR ( 1) O 22  | /632. BD*( 1) C 12 - C 21  | 0.84 19.24 0.115 |
| 96. CR ( 1) N 23  | /393. RY*( 2) C 21         | 1.76 15.46 0.147 |

|                   |                           |                  |
|-------------------|---------------------------|------------------|
| 96. CR ( 1) N 23  | /431. RY*( 1) C 24        | 0.58 15.45 0.085 |
| 96. CR ( 1) N 23  | /432. RY*( 2) C 24        | 0.68 15.60 0.092 |
| 96. CR ( 1) N 23  | /434. RY*( 4) C 24        | 0.88 15.38 0.104 |
| 96. CR ( 1) N 23  | /581. RY*( 3) H 44        | 0.51 16.47 0.082 |
| 96. CR ( 1) N 23  | /656. BD*( 1) C 24 - C 26 | 0.58 14.85 0.083 |
| 97. CR ( 1) C 24  | /445. RY*( 2) C 25        | 0.92 11.43 0.092 |
| 97. CR ( 1) C 24  | /458. RY*( 2) C 26        | 1.85 11.35 0.129 |
| 97. CR ( 1) C 24  | /652. BD*( 1) C 21 - N 23 | 1.08 10.46 0.097 |
| 97. CR ( 1) C 24  | /656. BD*( 1) C 24 - C 26 | 1.41 10.74 0.110 |
| 97. CR ( 1) C 24  | /658. BD*( 1) C 25 - C 27 | 0.57 10.75 0.070 |
| 97. CR ( 1) C 24  | /661. BD*( 1) C 26 - C 28 | 0.92 10.57 0.089 |
| 97. CR ( 1) C 24  | /662. BD*( 1) C 26 - H 46 | 0.52 10.56 0.066 |
| 98. CR ( 1) C 25  | /431. RY*( 1) C 24        | 1.22 11.29 0.105 |
| 98. CR ( 1) C 25  | /471. RY*( 2) C 27        | 2.12 11.50 0.140 |
| 98. CR ( 1) C 25  | /585. RY*( 2) H 45        | 0.52 12.32 0.071 |
| 98. CR ( 1) C 25  | /653. BD*( 1) N 23 - C 24 | 0.57 10.43 0.069 |
| 98. CR ( 1) C 25  | /656. BD*( 1) C 24 - C 26 | 0.75 10.68 0.080 |
| 98. CR ( 1) C 25  | /658. BD*( 1) C 25 - C 27 | 0.83 10.70 0.084 |
| 98. CR ( 1) C 25  | /663. BD*( 1) C 27 - C 29 | 1.06 10.52 0.095 |
| 99. CR ( 1) C 26  | /432. RY*( 2) C 24        | 2.58 11.43 0.153 |
| 99. CR ( 1) C 26  | /484. RY*( 2) C 28        | 0.79 11.48 0.085 |
| 99. CR ( 1) C 26  | /653. BD*( 1) N 23 - C 24 | 1.03 10.42 0.093 |
| 99. CR ( 1) C 26  | /655. BD*( 1) C 24 - C 25 | 1.20 10.49 0.101 |
| 99. CR ( 1) C 26  | /656. BD*( 1) C 24 - C 26 | 0.73 10.68 0.079 |
| 99. CR ( 1) C 26  | /665. BD*( 1) C 28 - C 29 | 0.64 10.70 0.074 |
| 100. CR ( 1) C 27 | /445. RY*( 2) C 25        | 1.57 11.38 0.119 |
| 100. CR ( 1) C 27 | /447. RY*( 4) C 25        | 0.51 11.00 0.067 |
| 100. CR ( 1) C 27 | /497. RY*( 2) C 29        | 0.81 11.48 0.086 |
| 100. CR ( 1) C 27 | /595. RY*( 2) H 47        | 0.58 12.28 0.075 |
| 100. CR ( 1) C 27 | /655. BD*( 1) C 24 - C 25 | 1.18 10.50 0.100 |
| 100. CR ( 1) C 27 | /658. BD*( 1) C 25 - C 27 | 0.75 10.70 0.080 |
| 100. CR ( 1) C 27 | /660. BD*( 1) C 25 - H 45 | 0.53 10.48 0.067 |
| 100. CR ( 1) C 27 | /665. BD*( 1) C 28 - C 29 | 0.62 10.71 0.073 |
| 101. CR ( 1) C 28 | /497. RY*( 2) C 29        | 2.11 11.48 0.139 |
| 101. CR ( 1) C 28 | /600. RY*( 2) H 48        | 0.55 12.28 0.073 |
| 101. CR ( 1) C 28 | /656. BD*( 1) C 24 - C 26 | 0.69 10.68 0.077 |
| 101. CR ( 1) C 28 | /663. BD*( 1) C 27 - C 29 | 1.07 10.51 0.095 |
| 101. CR ( 1) C 28 | /665. BD*( 1) C 28 - C 29 | 0.82 10.70 0.084 |
| 101. CR ( 1) C 28 | /668. BD*( 1) C 29 - H 49 | 0.51 10.49 0.066 |
| 102. CR ( 1) C 29 | /471. RY*( 2) C 27        | 0.78 11.49 0.084 |
| 102. CR ( 1) C 29 | /484. RY*( 2) C 28        | 2.15 11.48 0.140 |
| 102. CR ( 1) C 29 | /605. RY*( 2) H 49        | 0.56 12.28 0.074 |
| 102. CR ( 1) C 29 | /658. BD*( 1) C 25 - C 27 | 0.63 10.69 0.073 |
| 102. CR ( 1) C 29 | /661. BD*( 1) C 26 - C 28 | 1.04 10.51 0.094 |
| 102. CR ( 1) C 29 | /665. BD*( 1) C 28 - C 29 | 0.80 10.70 0.083 |
| 102. CR ( 1) C 29 | /667. BD*( 1) C 28 - H 48 | 0.50 10.49 0.065 |
| 103. LP ( 1) O 8  | /197. RY*( 1) C 7         | 1.65 1.52 0.045  |
| 103. LP ( 1) O 8  | /200. RY*( 4) C 7         | 1.62 2.60 0.058  |
| 103. LP ( 1) O 8  | /236. RY*( 1) C 10        | 1.66 1.66 0.047  |
| 103. LP ( 1) O 8  | /238. RY*( 3) C 10        | 0.72 1.55 0.030  |
| 103. LP ( 1) O 8  | /625. BD*( 1) C 7 - O 9   | 5.70 1.08 0.070  |
| 103. LP ( 1) O 8  | /629. BD*( 1) C 10 - H 34 | 0.64 0.95 0.022  |
| 103. LP ( 1) O 8  | /630. BD*( 1) C 10 - H 35 | 2.37 0.95 0.043  |
| 104. LP ( 2) O 8  | /199. RY*( 3) C 7         | 1.80 1.84 0.054  |
| 104. LP ( 2) O 8  | /237. RY*( 2) C 10        | 1.44 1.49 0.044  |

|                    |                           |                  |
|--------------------|---------------------------|------------------|
| 104. LP ( 2) O 8   | /626. BD*( 2) C 7 - O 9   | 38.61 0.31 0.100 |
| 104. LP ( 2) O 8   | /628. BD*( 1) C 10 - H 33 | 5.04 0.70 0.055  |
| 104. LP ( 2) O 8   | /629. BD*( 1) C 10 - H 34 | 5.03 0.70 0.056  |
| 105. LP ( 1) O 9   | /197. RY*( 1) C 7         | 12.33 1.65 0.127 |
| 105. LP ( 1) O 9   | /208. RY*( 12) C 7        | 0.51 10.74 0.067 |
| 105. LP ( 1) O 9   | /617. BD*( 1) C 3 - C 7   | 2.26 1.13 0.045  |
| 105. LP ( 1) O 9   | /624. BD*( 1) C 7 - O 8   | 0.98 0.99 0.028  |
| 106. LP ( 2) O 9   | /198. RY*( 2) C 7         | 1.95 1.70 0.053  |
| 106. LP ( 2) O 9   | /200. RY*( 4) C 7         | 1.70 2.28 0.058  |
| 106. LP ( 2) O 9   | /617. BD*( 1) C 3 - C 7   | 12.44 0.68 0.084 |
| 106. LP ( 2) O 9   | /624. BD*( 1) C 7 - O 8   | 28.87 0.55 0.113 |
| 106. LP ( 2) O 9   | /630. BD*( 1) C 10 - H 35 | 0.80 0.64 0.021  |
| 107. LP ( 1) Se 11 | /184. RY*( 1) C 6         | 1.15 1.78 0.040  |
| 107. LP ( 1) Se 11 | /620. BD*( 1) C 5 - C 6   | 3.27 1.36 0.060  |
| 108. LP ( 2) Se 11 | /618. BD*( 1) C 4 - C 6   | 1.72 0.70 0.031  |
| 108. LP ( 2) Se 11 | /620. BD*( 1) C 5 - C 6   | 1.11 0.88 0.028  |
| 108. LP ( 2) Se 11 | /621. BD*( 2) C 5 - C 6   | 8.58 0.27 0.044  |
| 108. LP ( 2) Se 11 | /633. BD*( 1) C 12 - H 36 | 2.40 0.61 0.035  |
| 108. LP ( 2) Se 11 | /634. BD*( 1) C 12 - H 37 | 3.92 0.62 0.045  |
| 109. LP ( 1) N 13  | /121. RY*( 3) C 1         | 1.06 1.55 0.039  |
| 109. LP ( 1) N 13  | /122. RY*( 4) C 1         | 0.78 1.63 0.034  |
| 109. LP ( 1) N 13  | /303. RY*( 3) C 14        | 1.62 1.51 0.048  |
| 109. LP ( 1) N 13  | /550. RY*( 2) H 38        | 0.74 1.97 0.037  |
| 109. LP ( 1) N 13  | /609. BD*( 1) C 1 - C 2   | 3.61 0.71 0.048  |
| 109. LP ( 1) N 13  | /610. BD*( 1) C 1 - C 3   | 2.69 0.88 0.047  |
| 109. LP ( 1) N 13  | /611. BD*( 2) C 1 - C 3   | 18.13 0.30 0.066 |
| 109. LP ( 1) N 13  | /639. BD*( 2) C 14 - O 16 | 48.43 0.26 0.102 |
| 110. LP ( 1) O 16  | /301. RY*( 1) C 14        | 13.88 1.47 0.128 |
| 110. LP ( 1) O 16  | /635. BD*( 1) N 13 - C 14 | 1.33 1.06 0.034  |
| 110. LP ( 1) O 16  | /637. BD*( 1) C 14 - C 15 | 2.25 1.09 0.044  |
| 111. LP ( 2) O 16  | /302. RY*( 2) C 14        | 1.87 1.60 0.050  |
| 111. LP ( 2) O 16  | /304. RY*( 4) C 14        | 1.01 1.83 0.040  |
| 111. LP ( 2) O 16  | /305. RY*( 5) C 14        | 1.10 2.14 0.045  |
| 111. LP ( 2) O 16  | /635. BD*( 1) N 13 - C 14 | 24.49 0.62 0.111 |
| 111. LP ( 2) O 16  | /637. BD*( 1) C 14 - C 15 | 14.00 0.65 0.087 |
| 112. LP ( 1) O 19  | /353. RY*( 1) C 18        | 2.31 1.42 0.051  |
| 112. LP ( 1) O 19  | /356. RY*( 4) C 18        | 1.92 2.74 0.065  |
| 112. LP ( 1) O 19  | /576. RY*( 3) H 43        | 1.29 2.27 0.049  |
| 112. LP ( 1) O 19  | /647. BD*( 1) C 18 - O 20 | 5.42 1.14 0.070  |
| 113. LP ( 2) O 19  | /355. RY*( 3) C 18        | 2.01 1.87 0.057  |
| 113. LP ( 2) O 19  | /575. RY*( 2) H 43        | 1.55 1.81 0.049  |
| 113. LP ( 2) O 19  | /648. BD*( 2) C 18 - O 20 | 41.24 0.32 0.103 |
| 114. LP ( 1) O 20  | /353. RY*( 1) C 18        | 14.14 1.52 0.131 |
| 114. LP ( 1) O 20  | /365. RY*( 13) C 18       | 0.76 3.79 0.048  |
| 114. LP ( 1) O 20  | /643. BD*( 1) C 17 - C 18 | 2.20 1.09 0.044  |
| 114. LP ( 1) O 20  | /646. BD*( 1) C 18 - O 19 | 0.88 1.00 0.027  |
| 115. LP ( 2) O 20  | /354. RY*( 2) C 18        | 2.62 1.51 0.058  |
| 115. LP ( 2) O 20  | /356. RY*( 4) C 18        | 1.17 2.38 0.049  |
| 115. LP ( 2) O 20  | /637. BD*( 1) C 14 - C 15 | 0.74 0.67 0.020  |
| 115. LP ( 2) O 20  | /643. BD*( 1) C 17 - C 18 | 13.96 0.64 0.086 |
| 115. LP ( 2) O 20  | /646. BD*( 1) C 18 - O 19 | 27.80 0.56 0.112 |
| 116. LP ( 1) O 22  | /392. RY*( 1) C 21        | 14.07 1.45 0.128 |
| 116. LP ( 1) O 22  | /632. BD*( 1) C 12 - C 21 | 2.48 1.08 0.047  |
| 116. LP ( 1) O 22  | /652. BD*( 1) C 21 - N 23 | 1.37 1.06 0.034  |
| 117. LP ( 2) O 22  | /393. RY*( 2) C 21        | 1.82 1.51 0.048  |

|                          |                            |                   |
|--------------------------|----------------------------|-------------------|
| 117. LP ( 2) O 22        | /395. RY*( 4) C 21         | 1.52 2.11 0.052   |
| 117. LP ( 2) O 22        | /396. RY*( 5) C 21         | 0.73 1.75 0.033   |
| 117. LP ( 2) O 22        | /632. BD*( 1) C 12 - C 21  | 14.50 0.64 0.088  |
| 117. LP ( 2) O 22        | /652. BD*( 1) C 21 - N 23  | 24.13 0.62 0.110  |
| 118. LP ( 1) N 23        | /394. RY*( 3) C 21         | 1.47 1.65 0.048   |
| 118. LP ( 1) N 23        | /399. RY*( 8) C 21         | 0.57 1.80 0.031   |
| 118. LP ( 1) N 23        | /433. RY*( 3) C 24         | 1.81 1.48 0.050   |
| 118. LP ( 1) N 23        | /580. RY*( 2) H 44         | 0.92 1.87 0.040   |
| 118. LP ( 1) N 23        | /650. BD*( 1) C 21 - O 22  | 1.74 0.78 0.035   |
| 118. LP ( 1) N 23        | /651. BD*( 2) C 21 - O 22  | 42.73 0.27 0.097  |
| 118. LP ( 1) N 23        | /655. BD*( 1) C 24 - C 25  | 1.97 0.72 0.036   |
| 118. LP ( 1) N 23        | /656. BD*( 1) C 24 - C 26  | 1.48 0.91 0.035   |
| 118. LP ( 1) N 23        | /657. BD*( 2) C 24 - C 26  | 20.90 0.31 0.073  |
| 611. BD*( 2) C 1 - C 3   | /123. RY*( 5) C 1          | 1.08 1.27 0.085   |
| 611. BD*( 2) C 1 - C 3   | /148. RY*( 4) C 3          | 0.73 0.76 0.054   |
| 611. BD*( 2) C 1 - C 3   | /149. RY*( 5) C 3          | 0.55 1.61 0.068   |
| 611. BD*( 2) C 1 - C 3   | /614. BD*( 2) C 2 - C 4    | 150.66 0.01 0.072 |
| 611. BD*( 2) C 1 - C 3   | /624. BD*( 1) C 7 - O 8    | 0.84 0.25 0.029   |
| 611. BD*( 2) C 1 - C 3   | /635. BD*( 1) N 13 - C 14  | 0.66 0.34 0.030   |
| 611. BD*( 2) C 1 - C 3   | /636. BD*( 1) N 13 - H 38  | 0.96 0.31 0.038   |
| 614. BD*( 2) C 2 - C 4   | /134. RY*( 3) C 2          | 0.88 0.67 0.072   |
| 614. BD*( 2) C 2 - C 4   | /162. RY*( 5) C 4          | 0.81 1.39 0.100   |
| 621. BD*( 2) C 5 - C 6   | /173. RY*( 3) C 5          | 2.58 0.56 0.096   |
| 621. BD*( 2) C 5 - C 6   | /186. RY*( 3) C 6          | 0.63 0.83 0.058   |
| 621. BD*( 2) C 5 - C 6   | /614. BD*( 2) C 2 - C 4    | 130.87 0.01 0.071 |
| 621. BD*( 2) C 5 - C 6   | /631. BD*( 1) Se 11 - C 12 | 1.35 0.07 0.023   |
| 624. BD*( 1) C 7 - O 8   | /198. RY*( 2) C 7          | 1.61 1.16 0.163   |
| 624. BD*( 1) C 7 - O 8   | /210. RY*( 1) O 8          | 0.57 1.05 0.094   |
| 624. BD*( 1) C 7 - O 8   | /616. BD*( 1) C 3 - C 5    | 1.05 0.16 0.045   |
| 624. BD*( 1) C 7 - O 8   | /617. BD*( 1) C 3 - C 7    | 0.80 0.14 0.034   |
| 624. BD*( 1) C 7 - O 8   | /625. BD*( 1) C 7 - O 9    | 0.53 0.22 0.039   |
| 626. BD*( 2) C 7 - O 9   | /199. RY*( 3) C 7          | 1.50 1.53 0.119   |
| 626. BD*( 2) C 7 - O 9   | /224. RY*( 2) O 9          | 1.09 0.98 0.082   |
| 626. BD*( 2) C 7 - O 9   | /611. BD*( 2) C 1 - C 3    | 34.06 0.05 0.067  |
| 639. BD*( 2) C 14 - O 16 | /303. RY*( 3) C 14         | 0.91 1.24 0.085   |
| 639. BD*( 2) C 14 - O 16 | /328. RY*( 2) O 16         | 1.21 1.04 0.090   |
| 639. BD*( 2) C 14 - O 16 | /640. BD*( 1) C 15 - C 17  | 1.04 0.36 0.048   |
| 639. BD*( 2) C 14 - O 16 | /641. BD*( 1) C 15 - H 39  | 0.91 0.37 0.046   |
| 648. BD*( 2) C 18 - O 20 | /355. RY*( 3) C 18         | 1.38 1.55 0.125   |
| 648. BD*( 2) C 18 - O 20 | /361. RY*( 9) C 18         | 0.66 1.22 0.078   |
| 648. BD*( 2) C 18 - O 20 | /380. RY*( 2) O 20         | 0.79 0.96 0.075   |
| 648. BD*( 2) C 18 - O 20 | /644. BD*( 1) C 17 - H 41  | 0.90 0.38 0.049   |
| 648. BD*( 2) C 18 - O 20 | /645. BD*( 1) C 17 - H 42  | 0.92 0.38 0.049   |
| 651. BD*( 2) C 21 - O 22 | /394. RY*( 3) C 21         | 1.19 1.38 0.099   |
| 651. BD*( 2) C 21 - O 22 | /406. RY*( 2) O 22         | 1.15 0.97 0.083   |
| 651. BD*( 2) C 21 - O 22 | /623. BD*( 1) C 6 - Se 11  | 0.51 0.11 0.018   |
| 651. BD*( 2) C 21 - O 22 | /631. BD*( 1) Se 11 - C 12 | 5.14 0.08 0.049   |
| 651. BD*( 2) C 21 - O 22 | /633. BD*( 1) C 12 - H 36  | 0.69 0.36 0.038   |
| 651. BD*( 2) C 21 - O 22 | /650. BD*( 1) C 21 - O 22  | 2.33 0.51 0.081   |
| 657. BD*( 2) C 24 - C 26 | /436. RY*( 6) C 24         | 0.84 1.28 0.081   |
| 657. BD*( 2) C 24 - C 26 | /459. RY*( 3) C 26         | 1.77 0.67 0.085   |
| 657. BD*( 2) C 24 - C 26 | /652. BD*( 1) C 21 - N 23  | 0.56 0.31 0.029   |
| 659. BD*( 2) C 25 - C 27 | /446. RY*( 3) C 25         | 0.54 0.76 0.055   |
| 659. BD*( 2) C 25 - C 27 | /448. RY*( 5) C 25         | 0.73 1.45 0.087   |
| 659. BD*( 2) C 25 - C 27 | /472. RY*( 3) C 27         | 0.54 0.78 0.055   |

|                          |                    |      |      |       |
|--------------------------|--------------------|------|------|-------|
| 659. BD*( 2) C 25 - C 27 | /473. RY*( 4) C 27 | 0.79 | 1.43 | 0.090 |
| 666. BD*( 2) C 28 - C 29 | /486. RY*( 4) C 28 | 1.69 | 0.59 | 0.084 |
| 666. BD*( 2) C 28 - C 29 | /498. RY*( 3) C 29 | 1.38 | 0.58 | 0.076 |

# NATURAL BOND ORBITAL ANALYSIS:

| Cycle | Thresh. | Occupancies |           | Lewis Structure |     | Low |    | High |      | Dev  |
|-------|---------|-------------|-----------|-----------------|-----|-----|----|------|------|------|
|       |         | Occ.        | -----     | -----           | occ | occ |    |      |      |      |
|       |         | Lewis       | Non-Lewis | CR              | BD  | 3C  | LP | (L)  | (NL) |      |
| ===== |         |             |           |                 |     |     |    |      |      |      |
| 1(1)  | 1.90    | 225.92376   | 10.07624  | 42              | 59  | 0   | 17 | 24   | 15   | 0.64 |
| 2(2)  | 1.90    | 225.92376   | 10.07624  | 42              | 59  | 0   | 17 | 24   | 15   | 0.64 |
| 3(1)  | 1.80    | 228.28308   | 7.71692   | 42              | 57  | 0   | 19 | 5    | 11   | 0.64 |
| 4(2)  | 1.80    | 228.28308   | 7.71692   | 42              | 57  | 0   | 19 | 5    | 11   | 0.64 |
| 5(1)  | 1.70    | 231.81065   | 4.18935   | 42              | 60  | 0   | 16 | 0    | 11   | 0.26 |
| 6(2)  | 1.70    | 231.81065   | 4.18935   | 42              | 60  | 0   | 16 | 0    | 11   | 0.26 |
| 7(1)  | 1.60    | 231.81065   | 4.18935   | 42              | 60  | 0   | 16 | 0    | 11   | 0.26 |
| 8(2)  | 1.60    | 231.81065   | 4.18935   | 42              | 60  | 0   | 16 | 0    | 11   | 0.26 |
| 9(1)  | 1.50    | 231.30265   | 4.69735   | 42              | 59  | 0   | 17 | 0    | 13   | 0.74 |
| 10(2) | 1.50    | 230.83781   | 5.16219   | 42              | 59  | 0   | 17 | 0    | 13   | 1.04 |
| 11(3) | 1.50    | 231.30265   | 4.69735   | 42              | 59  | 0   | 17 | 0    | 13   | 0.74 |
| 12(1) | 1.70    | 231.81065   | 4.18935   | 42              | 60  | 0   | 16 | 0    | 11   | 0.26 |
| ----- |         |             |           |                 |     |     |    |      |      |      |

|                   |                             |
|-------------------|-----------------------------|
| -----             |                             |
| Core              | 83.97564 ( 99.971% of 84)   |
| Valence Lewis     | 147.83501 ( 97.260% of 152) |
| =====             |                             |
| Total Lewis       | 231.81065 ( 98.225% of 236) |
| -----             |                             |
| Valence non-Lewis | 3.74241 ( 1.586% of 236)    |
| Rydberg non-Lewis | 0.44693 ( 0.189% of 236)    |
| =====             |                             |
| Total non-Lewis   | 4.18935 ( 1.775% of 236)    |
| -----             |                             |
